# Supplementary material for: Identification of a novel cuproptosis-related gene signature and integrative analyses in patients with lower-grade gliomas
Source: Front Immunol. 2022 Aug 15;13:933973. doi: 10.3389/fimmu.2022.933973 (PMC9420977; doi:10.3389/fimmu.2022.933973)
Supplement: Supplementary file 2 [file Table_1.xlsx]

## Sheet: TableS1
Supplementary Table 1. Summary of 13 cuproptosis related genes.
Gene	Description	Type
FDX1	Ferredoxin 1	cuproptosis
LIPT1	Lipoyltransferase 1	cuproptosis
LIAS	Lipoic Acid Synthetase	cuproptosis
DLD	Dihydrolipoamide Dehydrogenase	cuproptosis
DBT	Dihydrolipoamide Branched Chain Transacylase E2	cuproptosis
GCSH	Glycine Cleavage System Protein H	cuproptosis
DLST	Dihydrolipoamide S-Succinyltransferase	cuproptosis
DLAT	Dihydrolipoamide S-Acetyltransferase	cuproptosis
PDHA1	Pyruvate Dehydrogenase E1 Subunit Alpha 1	cuproptosis
PDHB	Pyruvate Dehydrogenase E1 Subunit Beta	cuproptosis
SLC31A1	Solute Carrier Family 31 Member 1	cuproptosis
ATP7A	ATPase Copper Transporting Alpha	cuproptosis
ATP7B	ATPase Copper Transporting Beta	cuproptosis

## Sheet: Table S2
Supplementary Table 2. Clinical characteristics of patients with LGG enrolled from SYSUCC.
ID	Gender	Age	Tumor location	Grade	IDH1/2 mutation	1p/19q deleption	Methylation of MGMT promoter
Patient 1	Female	27	right frontal lobe	II	Yes	No	Yes
Patient 2	Male	35	right insula, right temporal insula	II	No	Yes	Yes
Patient 3	Female	27	left frontotemporal insula	II	Yes	No	Yes
Patient 4	Male	65	left temporal insula	II	Yes	No	Yes
Patient 5	Female	43	left frontotemporal lobe	III	Yes	Yes	Yes

## Sheet: Table S3
Supplementary Table 3. Oligo sequences used in quantitative real-time PCR.
Species	Gene	Primer Sequence
Homo sapiens	C21orf62	Forward	CACAAGGGAAAACACCATTCGG
		Reverse	CTGGTTCGCTCTACTGCAAG
Homo sapiens	DRAXIN	Forward	CATTGCCCTACCCCGAGAAG
		Reverse	CCCTGCGTCTCTTGTGCTC
Homo sapiens	ITPRID2	Forward	CGGAGACGGAGGATCTGTC
		Reverse	AGTGAGGCTCCCAAAGGTGT
Homo sapiens	MAP3K1	Forward	TCTCACCATATAGCCCTGAGGA
		Reverse	AGGAAAGAGTTAGGCCCTATCTG
Homo sapiens	MOXD1	Forward	AGAGTTTGCGGTTATTGAATCCT
		Reverse	CGCTGTCGTTAAAGTTGTTGC

## Sheet: Table S4
Supplementary Table 4. The activation states of GOBP and KEGG terms between CRG clusters by GSVA.
Term	logFC	AveExpr	t	P.Value	adj.P.Value	B
GOBP_ENDOPLASMIC_RETICULUM_TO_GOLGI_VESICLE_MEDIATED_TRANSPORT	-0.428072	-0.0354765	-20.1071	7.3981e-67	3.87734e-63	141.48
GOBP_COPII_COATED_VESICLE_BUDDING	-0.502786	-0.0334761	-19.964	3.72766e-66	9.76834e-63	139.874
GOBP_GOLGI_VESICLE_TRANSPORT	-0.368549	-0.0349345	-19.0098	1.73144e-61	3.02482e-58	129.203
GOBP_NUCLEAR_PORE_ORGANIZATION	-0.58788	-0.0365283	-18.2812	5.96087e-58	7.81023e-55	121.116
GOBP_NUCLEAR_PORE_COMPLEX_ASSEMBLY	-0.599008	-0.0357714	-18.1411	2.83165e-57	2.96814e-54	119.569
GOBP_VESICLE_TARGETING_ROUGH_ER_TO_CIS_GOLGI	-0.457116	-0.0400431	-18.0678	6.39839e-57	5.589e-54	118.759
GOBP_PROTEIN_K48_LINKED_UBIQUITINATION	-0.403162	-0.0366182	-18.016	1.13679e-56	8.5113e-54	118.189
GOBP_POSITIVE_REGULATION_OF_PROTEIN_POLYUBIQUITINATION	-0.465005	-0.03884	-17.8228	9.67614e-56	5.66741e-53	116.062
GOBP_GOLGI_ORGANIZATION	-0.342547	-0.0309413	-17.8223	9.73224e-56	5.66741e-53	116.057
GOBP_PROTEASOME_MEDIATED_UBIQUITIN_DEPENDENT_PROTEIN_CATABOLIC_PROCESS	-0.328203	-0.0345665	-17.6947	3.99193e-55	2.09217e-52	114.655
GOBP_REGULATION_OF_PROTEIN_POLYUBIQUITINATION	-0.371351	-0.0403312	-17.6766	4.88061e-55	2.32539e-52	114.456
GOBP_PROTEIN_LOCALIZATION_TO_MICROTUBULE_ORGANIZING_CENTER	-0.437684	-0.0395221	-17.6237	8.75588e-55	3.82413e-52	113.875
GOBP_VESICLE_TARGETING	-0.376443	-0.0373701	-17.5909	1.25747e-54	5.06955e-52	113.516
GOBP_VESICLE_TARGETING_TO_FROM_OR_WITHIN_GOLGI	-0.422243	-0.0384093	-17.5468	2.04493e-54	7.65533e-52	113.033
GOBP_COPII_COATED_VESICLE_CARGO_LOADING	-0.52404	-0.035589	-17.523	2.65855e-54	9.28899e-52	112.773
GOBP_PROTEASOMAL_PROTEIN_CATABOLIC_PROCESS	-0.308164	-0.0361632	-17.289	3.49399e-53	1.10535e-50	110.215
GOBP_VESICLE_BUDDING_FROM_MEMBRANE	-0.369592	-0.0375989	-17.2867	3.58537e-53	1.10535e-50	110.189
GOBP_REGULATION_OF_ER_TO_GOLGI_VESICLE_MEDIATED_TRANSPORT	-0.431547	-0.0268456	-17.253	5.19092e-53	1.51142e-50	109.822
GOBP_PROTEIN_POLYUBIQUITINATION	-0.341857	-0.0329081	-17.2316	6.56447e-53	1.81076e-50	109.589
GOBP_BLASTOCYST_GROWTH	-0.43078	-0.0375747	-17.1311	1.97799e-52	5.18333e-50	108.494
GOBP_INTRA_GOLGI_VESICLE_MEDIATED_TRANSPORT	-0.381273	-0.0410647	-17.0154	7.0254e-52	1.75334e-49	107.235
GOBP_PROTEIN_LOCALIZATION_TO_CYTOSKELETON	-0.338015	-0.0377232	-16.9057	2.33158e-51	5.55446e-49	106.044
GOBP_SOMATIC_DIVERSIFICATION_OF_IMMUNE_RECEPTORS_VIA_SOMATIC_MUTATION	-0.426283	-0.0470431	-16.8683	3.50498e-51	7.98678e-49	105.64
GOBP_REGULATION_OF_TRANSLATION_IN_RESPONSE_TO_ENDOPLASMIC_RETICULUM_STRESS	-0.542829	-0.0474079	-16.8433	4.60492e-51	1.0056e-48	105.369
GOBP_ENDOPLASMIC_RETICULUM_ORGANIZATION	-0.326792	-0.0409455	-16.6816	2.68249e-50	5.62358e-48	103.619
GOBP_AMINO_ACID_ACTIVATION	-0.439943	-0.0403137	-16.6634	3.27102e-50	6.59362e-48	103.422
GOBP_PEPTIDYL_ARGININE_N_METHYLATION	-0.40752	-0.0464707	-16.6505	3.76035e-50	7.29926e-48	103.284
GOBP_ENDOPLASMIC_RETICULUM_MEMBRANE_ORGANIZATION	-0.416368	-0.0405136	-16.6048	6.18633e-50	1.15795e-47	102.79
GOBP_PROTEIN_K11_LINKED_UBIQUITINATION	-0.408293	-0.0449828	-16.5651	9.52096e-50	1.72067e-47	102.362
GOBP_REGULATION_OF_CENTROSOME_CYCLE	-0.327631	-0.045583	-16.5466	1.16335e-49	2.03238e-47	102.163
GOBP_TRANSLATIONAL_TERMINATION	-0.434007	-0.0486019	-16.5415	1.22978e-49	2.07913e-47	102.108
GOBP_STRESS_GRANULE_ASSEMBLY	-0.453099	-0.0341243	-16.5288	1.41215e-49	2.31284e-47	101.97
GOBP_MITOCHONDRIAL_RNA_METABOLIC_PROCESS	-0.40815	-0.0409063	-16.4548	3.14896e-49	5.00112e-47	101.174
GOBP_INNER_CELL_MASS_CELL_PROLIFERATION	-0.475126	-0.0507021	-16.4042	5.44924e-49	8.39985e-47	100.63
GOBP_PROTEIN_K63_LINKED_UBIQUITINATION	-0.315753	-0.0426965	-16.3968	5.89899e-49	8.83331e-47	100.551
GOBP_PROTEIN_MONOUBIQUITINATION	-0.374071	-0.0391743	-16.3921	6.20753e-49	9.03713e-47	100.5
GOBP_REGULATION_OF_TRANSCRIPTION_INVOLVED_IN_G1_S_TRANSITION_OF_MITOTIC_CELL_CYCLE	-0.355246	-0.0467602	-16.3734	7.60505e-49	1.07725e-46	100.299
GOBP_MICROTUBULE_ORGANIZING_CENTER_ORGANIZATION	-0.319685	-0.0425809	-16.3411	1.0778e-48	1.48651e-46	99.9526
GOBP_REGULATION_OF_CELLULAR_RESPONSE_TO_HEAT	-0.410601	-0.0447348	-16.2887	1.89957e-48	2.55273e-46	99.39
GOBP_REGULATION_OF_TRANSLATION_IN_RESPONSE_TO_STRESS	-0.477976	-0.0477582	-16.2837	2.00565e-48	2.62791e-46	99.3361
GOBP_ERAD_PATHWAY	-0.313846	-0.0399875	-16.2272	3.69201e-48	4.71947e-46	98.7303
GOBP_POSITIVE_REGULATION_OF_MITOTIC_CELL_CYCLE	-0.298473	-0.0370249	-16.1955	5.19651e-48	6.4845e-46	98.391
GOBP_POSITIVE_REGULATION_OF_PROTEIN_MODIFICATION_BY_SMALL_PROTEIN_CONJUGATION_OR_REMOVAL	-0.289619	-0.038718	-16.1343	1.00424e-47	1.224e-45	97.737
GOBP_PROTEIN_AUTOUBIQUITINATION	-0.316422	-0.0351219	-16.1277	1.07817e-47	1.28425e-45	97.6665
GOBP_MITOTIC_CYTOKINESIS	-0.317931	-0.0469364	-16.1106	1.29683e-47	1.51038e-45	97.4832
GOBP_MITOCHONDRIAL_FISSION	-0.316377	-0.0373713	-16.1036	1.39838e-47	1.59324e-45	97.4084
GOBP_PROTEIN_MODIFICATION_BY_SMALL_PROTEIN_REMOVAL	-0.339059	-0.0279016	-16.064	2.14157e-47	2.38808e-45	96.9853
GOBP_PORE_COMPLEX_ASSEMBLY	-0.416577	-0.0435772	-16.0391	2.79786e-47	3.05491e-45	96.7199
GOBP_REGULATION_OF_TRANSLATIONAL_INITIATION_IN_RESPONSE_TO_STRESS	-0.483623	-0.0455776	-16.0271	3.18361e-47	3.33559e-45	96.5917
GOBP_UBIQUITIN_DEPENDENT_ERAD_PATHWAY	-0.328554	-0.0389289	-16.0264	3.20749e-47	3.33559e-45	96.5843
GOBP_REGULATION_OF_TRANSLATIONAL_TERMINATION	-0.411393	-0.0554094	-16.0253	3.24585e-47	3.33559e-45	96.5725
GOBP_MANNOSYLATION	-0.318609	-0.0484778	-16.0121	3.74206e-47	3.77157e-45	96.4313
GOBP_REGULATION_OF_TRANSLATIONAL_INITIATION_BY_EIF2_ALPHA_PHOSPHORYLATION	-0.547034	-0.0320337	-16.0065	3.97339e-47	3.92916e-45	96.3717
GOBP_PROTEIN_MANNOSYLATION	-0.319898	-0.0478621	-15.9616	6.43137e-47	6.242e-45	95.8937
GOBP_METHYLGUANOSINE_CAP_DECAPPING	-0.446046	-0.0436395	-15.94	8.10689e-47	7.72513e-45	95.6639
GOBP_POSITIVE_REGULATION_OF_ORGANELLE_ASSEMBLY	-0.296484	-0.034287	-15.9188	1.01849e-46	9.53193e-45	95.4374
GOBP_ER_NUCLEUS_SIGNALING_PATHWAY	-0.37694	-0.036228	-15.8944	1.32261e-46	1.2161e-44	95.178
GOBP_MICROTUBULE_CYTOSKELETON_ORGANIZATION_INVOLVED_IN_MITOSIS	-0.335164	-0.0430837	-15.856	1.99555e-46	1.80322e-44	94.7698
GOBP_PROTEIN_QUALITY_CONTROL_FOR_MISFOLDED_OR_INCOMPLETELY_SYNTHESIZED_PROTEINS	-0.397613	-0.0403011	-15.8429	2.29665e-46	2.04013e-44	94.6303
GOBP_VESICLE_CARGO_LOADING	-0.405905	-0.0235259	-15.823	2.84266e-46	2.45488e-44	94.4186
GOBP_REGULATION_OF_PROTEIN_K63_LINKED_UBIQUITINATION	-0.357808	-0.0390755	-15.8225	2.85724e-46	2.45488e-44	94.4135
GOBP_AUTOPHAGOSOME_MATURATION	-0.359704	-0.033546	-15.7717	4.91827e-46	4.15752e-44	93.8744
GOBP_ESTABLISHMENT_OF_ORGANELLE_LOCALIZATION	-0.235212	-0.0408189	-15.7352	7.26491e-46	6.04372e-44	93.4872
GOBP_ESTABLISHMENT_OF_MITOTIC_SPINDLE_LOCALIZATION	-0.348259	-0.0356775	-15.7135	9.15475e-46	7.41509e-44	93.2577
GOBP_DEADENYLATION_DEPENDENT_DECAPPING_OF_NUCLEAR_TRANSCRIBED_MRNA	-0.487152	-0.0414645	-15.7131	9.19635e-46	7.41509e-44	93.2532
GOBP_SOMATIC_DIVERSIFICATION_OF_IMMUNE_RECEPTORS	-0.322139	-0.0433288	-15.6943	1.12369e-45	8.92312e-44	93.0543
GOBP_ESTABLISHMENT_OF_PROTEIN_LOCALIZATION_TO_ORGANELLE	-0.275835	-0.0378429	-15.6876	1.20794e-45	9.44898e-44	92.9826
GOBP_POSITIVE_REGULATION_OF_DNA_TEMPLATED_TRANSCRIPTION_INITIATION	-0.369548	-0.042292	-15.6539	1.72917e-45	1.33273e-43	92.6265
GOBP_RESPONSE_TO_RADIATION	-0.182655	-0.0384747	-15.6511	1.78228e-45	1.35376e-43	92.5965
GOBP_VESICLE_ORGANIZATION	-0.252387	-0.0378969	-15.6187	2.51612e-45	1.88386e-43	92.2542
GOBP_CYTOKINESIS	-0.243603	-0.0386645	-15.5696	4.24498e-45	3.13351e-43	91.7351
GOBP_POSTREPLICATION_REPAIR	-0.407769	-0.0457019	-15.5581	4.79858e-45	3.49296e-43	91.6134
GOBP_SOMATIC_DIVERSIFICATION_OF_IMMUNOGLOBULINS	-0.320278	-0.0435102	-15.541	5.75541e-45	4.13207e-43	91.433
GOBP_REGULATION_OF_TELOMERE_MAINTENANCE_VIA_TELOMERE_LENGTHENING	-0.387354	-0.0332535	-15.4274	1.92417e-44	1.36278e-42	90.2351
GOBP_POSITIVE_REGULATION_OF_VIRAL_GENOME_REPLICATION	-0.339721	-0.0436848	-15.3935	2.75353e-44	1.92416e-42	89.8794
GOBP_REGULATION_OF_ORGANELLE_ASSEMBLY	-0.262844	-0.0333787	-15.39	2.85904e-44	1.97161e-42	89.8421
GOBP_MITOTIC_SPINDLE_ORGANIZATION	-0.32631	-0.0443993	-15.3385	4.93374e-44	3.34872e-42	89.3006
GOBP_PEPTIDYL_ARGININE_METHYLATION	-0.32497	-0.0402006	-15.3375	4.98378e-44	3.34872e-42	89.2906
GOBP_RNA_DECAPPING	-0.393298	-0.0455609	-15.3199	6.00697e-44	3.98513e-42	89.1053
GOBP_POSITIVE_REGULATION_OF_MITOTIC_CELL_CYCLE_PHASE_TRANSITION	-0.297454	-0.0364276	-15.3064	6.92556e-44	4.53711e-42	88.964
GOBP_RETROGRADE_VESICLE_MEDIATED_TRANSPORT_GOLGI_TO_ENDOPLASMIC_RETICULUM	-0.334585	-0.0436706	-15.3032	7.16617e-44	4.63678e-42	88.9301
GOBP_MACROAUTOPHAGY	-0.289659	-0.0346471	-15.2483	1.28023e-43	8.18257e-42	88.3543
GOBP_CYTOSKELETON_DEPENDENT_CYTOKINESIS	-0.267925	-0.0425767	-15.2381	1.42515e-43	8.99903e-42	88.2479
GOBP_REGULATION_OF_CYTOKINESIS	-0.249136	-0.0338521	-15.2282	1.5835e-43	9.87989e-42	88.1433
GOBP_PROTEIN_CONTAINING_COMPLEX_DISASSEMBLY	-0.257418	-0.035898	-15.221	1.70872e-43	1.05357e-41	88.0678
GOBP_MITOCHONDRIAL_GENOME_MAINTENANCE	-0.305313	-0.0421519	-15.1981	2.17481e-43	1.32537e-41	87.8284
GOBP_MITOTIC_SPINDLE_ASSEMBLY	-0.341522	-0.0432621	-15.1702	2.91708e-43	1.75729e-41	87.537
GOBP_TOR_SIGNALING	-0.256976	-0.0373009	-15.1427	3.89798e-43	2.32151e-41	87.2493
GOBP_ENDOSOME_ORGANIZATION	-0.313703	-0.0375221	-15.1241	4.74558e-43	2.79456e-41	87.0541
GOBP_NUCLEUS_ORGANIZATION	-0.313277	-0.0328355	-15.1062	5.72509e-43	3.33391e-41	86.8679
GOBP_OLIGOSACCHARIDE_LIPID_INTERMEDIATE_BIOSYNTHETIC_PROCESS	-0.461547	-0.0514644	-15.0913	6.69665e-43	3.85683e-41	86.7123
GOBP_SPINDLE_ORGANIZATION	-0.277233	-0.0388412	-15.0609	9.22511e-43	5.20642e-41	86.3944
GOBP_REGULATION_OF_SPINDLE_ORGANIZATION	-0.307214	-0.0371413	-15.0607	9.23864e-43	5.20642e-41	86.393
GOBP_TELOMERE_MAINTENANCE_VIA_TELOMERE_LENGTHENING	-0.362297	-0.0362511	-15.0508	1.02517e-42	5.71589e-41	86.2897
GOBP_TELOMERE_CAPPING	-0.365182	-0.0362484	-15.0272	1.31387e-42	7.2484e-41	86.0435
GOBP_MITOTIC_CELL_CYCLE_PHASE_TRANSITION	-0.268829	-0.0375781	-15.0171	1.46086e-42	7.97536e-41	85.9383
GOBP_POST_GOLGI_VESICLE_MEDIATED_TRANSPORT	-0.309052	-0.0375859	-15.0015	1.72155e-42	9.30171e-41	85.7753
GOBP_RESPONSE_TO_AMINO_ACID_STARVATION	-0.297345	-0.0405138	-14.9966	1.81277e-42	9.69463e-41	85.7241
GOBP_PEPTIDYL_THREONINE_MODIFICATION	-0.261149	-0.0377696	-14.9927	1.88798e-42	9.99486e-41	85.6838
GOBP_REGULATION_OF_TELOMERE_CAPPING	-0.339306	-0.0374384	-14.9838	2.07319e-42	1.08656e-40	85.5909
GOBP_RESPONSE_TO_ENDOPLASMIC_RETICULUM_STRESS	-0.265302	-0.0373561	-14.9797	2.16428e-42	1.12307e-40	85.5482
GOBP_ESTABLISHMENT_OF_RNA_LOCALIZATION	-0.369745	-0.0286046	-14.9678	2.45077e-42	1.25926e-40	85.4249
GOBP_POSITIVE_REGULATION_OF_TRANSLATIONAL_INITIATION	-0.336235	-0.0315725	-14.9645	2.53802e-42	1.29143e-40	85.3901
GOBP_PROTEIN_IMPORT	-0.263305	-0.0395206	-14.9599	2.66368e-42	1.34234e-40	85.3422
GOBP_TRICARBOXYLIC_ACID_CYCLE	-0.401105	-0.03849	-14.9468	3.05436e-42	1.52456e-40	85.2064
GOBP_REGULATION_OF_MACROAUTOPHAGY	-0.292213	-0.0361979	-14.9165	4.1982e-42	2.07573e-40	84.8907
GOBP_RNA_INTERFERENCE	-0.409516	-0.0325741	-14.8903	5.52309e-42	2.70528e-40	84.6186
GOBP_NUCLEOBASE_CONTAINING_COMPOUND_TRANSPORT	-0.31438	-0.034148	-14.8843	5.87965e-42	2.85326e-40	84.5565
GOBP_IRE1_MEDIATED_UNFOLDED_PROTEIN_RESPONSE	-0.390764	-0.0406051	-14.8708	6.7689e-42	3.25466e-40	84.4167
GOBP_PHOSPHATIDYLINOSITOL_BIOSYNTHETIC_PROCESS	-0.240216	-0.0387158	-14.8662	7.10487e-42	3.38515e-40	84.3687
GOBP_REGULATION_OF_INTRACELLULAR_STEROID_HORMONE_RECEPTOR_SIGNALING_PATHWAY	-0.257696	-0.0377223	-14.8263	1.07859e-41	5.09268e-40	83.9544
GOBP_RNA_DEPENDENT_DNA_BIOSYNTHETIC_PROCESS	-0.36571	-0.0356622	-14.8163	1.19642e-41	5.59862e-40	83.8516
GOBP_NUCLEOTIDE_SUGAR_METABOLIC_PROCESS	-0.313976	-0.0508595	-14.814	1.22576e-41	5.68512e-40	83.8275
GOBP_REGULATION_OF_INTRACELLULAR_ESTROGEN_RECEPTOR_SIGNALING_PATHWAY	-0.288711	-0.0359824	-14.7934	1.52062e-41	6.99083e-40	83.6136
GOBP_TELOMERE_MAINTENANCE	-0.361648	-0.0354095	-14.7784	1.77707e-41	8.09879e-40	83.459
GOBP_VACUOLAR_TRANSPORT	-0.291558	-0.0296967	-14.7635	2.07621e-41	9.38055e-40	83.3046
GOBP_GOLGI_LOCALIZATION	-0.373192	-0.0483201	-14.7601	2.15202e-41	9.63995e-40	83.269
GOBP_MITOCHONDRIAL_FUSION	-0.308246	-0.0457675	-14.7547	2.27577e-41	1.01079e-39	83.2136
GOBP_NEGATIVE_REGULATION_OF_DNA_BIOSYNTHETIC_PROCESS	-0.295093	-0.0436316	-14.7357	2.77664e-41	1.22289e-39	83.0162
GOBP_POSITIVE_REGULATION_OF_MITOCHONDRIAL_FISSION	-0.361065	-0.0296452	-14.6968	4.16243e-41	1.81794e-39	82.6145
GOBP_CENTROSOME_DUPLICATION	-0.314806	-0.0422242	-14.6951	4.23651e-41	1.835e-39	82.597
GOBP_INTRACELLULAR_ESTROGEN_RECEPTOR_SIGNALING_PATHWAY	-0.2654	-0.0333093	-14.6801	4.95321e-41	2.12785e-39	82.4419
GOBP_POSITIVE_REGULATION_OF_G1_S_TRANSITION_OF_MITOTIC_CELL_CYCLE	-0.23502	-0.0279685	-14.6709	5.44854e-41	2.32161e-39	82.3473
GOBP_PROTEIN_LOCALIZATION_TO_ENDOPLASMIC_RETICULUM	-0.285907	-0.0408269	-14.6591	6.16452e-41	2.6055e-39	82.2248
GOBP_REGULATION_OF_TELOMERE_MAINTENANCE	-0.3772	-0.0326784	-14.6534	6.54026e-41	2.73022e-39	82.1661
GOBP_MONOUBIQUITINATED_PROTEIN_DEUBIQUITINATION	-0.412456	-0.037084	-14.653	6.56379e-41	2.73022e-39	82.1626
GOBP_RESPONSE_TO_LIGHT_STIMULUS	-0.154693	-0.0374227	-14.6508	6.71814e-41	2.77242e-39	82.1395
GOBP_SIGNAL_TRANSDUCTION_IN_RESPONSE_TO_DNA_DAMAGE	-0.312311	-0.0404782	-14.6464	7.03396e-41	2.88008e-39	82.0939
GOBP_POSITIVE_REGULATION_OF_CHROMOSOME_ORGANIZATION	-0.360171	-0.0350117	-14.6212	9.14074e-41	3.71369e-39	81.834
GOBP_REGULATION_OF_INTRACELLULAR_TRANSPORT	-0.202294	-0.0390321	-14.6039	1.09321e-40	4.40731e-39	81.6564
GOBP_POSITIVE_REGULATION_OF_TELOMERE_MAINTENANCE_VIA_TELOMERE_LENGTHENING	-0.366097	-0.0342983	-14.6021	1.11451e-40	4.45888e-39	81.6373
GOBP_NUCLEAR_TRANSPORT	-0.300204	-0.0361014	-14.5997	1.14258e-40	4.53403e-39	81.6126
GOBP_HISTONE_UBIQUITINATION	-0.385044	-0.0309	-14.599	1.15059e-40	4.53403e-39	81.6056
GOBP_NEGATIVE_REGULATION_OF_CELLULAR_MACROMOLECULE_BIOSYNTHETIC_PROCESS	-0.248651	-0.0260651	-14.5666	1.611e-40	6.30094e-39	81.2717
GOBP_RESPONSE_TO_TOPOLOGICALLY_INCORRECT_PROTEIN	-0.285417	-0.0351315	-14.5609	1.70956e-40	6.63689e-39	81.2128
GOBP_REGULATION_OF_DNA_METABOLIC_PROCESS	-0.285323	-0.0347839	-14.5599	1.72615e-40	6.65201e-39	81.2032
GOBP_MICROTUBULE_ANCHORING_AT_MICROTUBULE_ORGANIZING_CENTER	-0.406039	-0.0299101	-14.5577	1.76726e-40	6.76075e-39	81.1799
GOBP_MITOTIC_SISTER_CHROMATID_COHESION	-0.406096	-0.0419915	-14.5524	1.86666e-40	7.08926e-39	81.1256
GOBP_NEGATIVE_REGULATION_OF_DNA_METABOLIC_PROCESS	-0.289046	-0.0376617	-14.5429	2.06043e-40	7.76887e-39	81.0276
GOBP_RESPONSE_TO_LEUCINE	-0.45018	-0.0327206	-14.5372	2.18493e-40	8.17946e-39	80.9694
GOBP_REGULATION_OF_PROTEIN_LOCALIZATION_TO_CENTROSOME	-0.432673	-0.0461384	-14.5196	2.62261e-40	9.74829e-39	80.7882
GOBP_POSITIVE_REGULATION_OF_CELL_CYCLE	-0.231828	-0.0360391	-14.5129	2.81115e-40	1.03755e-38	80.7193
GOBP_PHOSPHORYLATION_OF_RNA_POLYMERASE_II_C_TERMINAL_DOMAIN	-0.4508	-0.0399012	-14.5074	2.97435e-40	1.09011e-38	80.6633
GOBP_REGULATION_OF_CHROMOSOME_ORGANIZATION	-0.358258	-0.0369393	-14.4815	3.88868e-40	1.41532e-38	80.3974
GOBP_CELLULAR_RESPONSE_TO_LIGHT_STIMULUS	-0.199267	-0.040658	-14.47	4.38423e-40	1.58467e-38	80.2784
GOBP_REGULATION_OF_AUTOPHAGY	-0.243073	-0.0365258	-14.464	4.66457e-40	1.67445e-38	80.2169
GOBP_CELL_CYCLE_G2_M_PHASE_TRANSITION	-0.282032	-0.0438121	-14.4628	4.72237e-40	1.68367e-38	80.2047
GOBP_MRNA_METHYLATION	-0.478916	-0.0350291	-14.439	6.03545e-40	2.13728e-38	79.9613
GOBP_ENDOSOMAL_TRANSPORT	-0.266268	-0.0345817	-14.4345	6.32666e-40	2.22537e-38	79.9145
GOBP_PROTEIN_LOCALIZATION_TO_GOLGI_APPARATUS	-0.329251	-0.0354673	-14.4336	6.38434e-40	2.23069e-38	79.9055
GOBP_NUCLEAR_EXPORT	-0.343908	-0.0325004	-14.432	6.49219e-40	2.25335e-38	79.8889
GOBP_NEGATIVE_REGULATION_OF_CELLULAR_CATABOLIC_PROCESS	-0.231031	-0.0356334	-14.4285	6.72872e-40	2.32008e-38	79.8534
GOBP_NEGATIVE_REGULATION_OF_CATABOLIC_PROCESS	-0.212335	-0.0343888	-14.4216	7.22685e-40	2.47555e-38	79.7826
GOBP_ORGANELLE_FUSION	-0.23412	-0.0410135	-14.4186	7.45359e-40	2.53664e-38	79.7519
GOBP_ENDOPLASMIC_RETICULUM_UNFOLDED_PROTEIN_RESPONSE	-0.295368	-0.0352965	-14.4088	8.24733e-40	2.78866e-38	79.6515
GOBP_RNA_LOCALIZATION	-0.360791	-0.0297822	-14.3966	9.35495e-40	3.1429e-38	79.5265
GOBP_REGULATION_OF_MICROTUBULE_BASED_PROCESS	-0.205921	-0.0321175	-14.3931	9.70308e-40	3.2391e-38	79.4903
GOBP_CELLULAR_RESPONSE_TO_TOPOLOGICALLY_INCORRECT_PROTEIN	-0.294579	-0.0329092	-14.3877	1.02574e-39	3.40248e-38	79.4351
GOBP_REGULATION_OF_TOR_SIGNALING	-0.247654	-0.0374193	-14.3632	1.32133e-39	4.35541e-38	79.1839
GOBP_CELL_CYCLE_G1_S_PHASE_TRANSITION	-0.238852	-0.033881	-14.3537	1.45647e-39	4.77085e-38	79.0873
GOBP_MISMATCH_REPAIR	-0.368855	-0.0436789	-14.3497	1.51764e-39	4.94035e-38	79.0465
GOBP_INSULIN_METABOLIC_PROCESS	-0.334432	-0.042136	-14.3166	2.13413e-39	6.9043e-38	78.7083
GOBP_HISTONE_MONOUBIQUITINATION	-0.382394	-0.0313418	-14.2967	2.62046e-39	8.42568e-38	78.5046
GOBP_REGULATION_OF_CENTRIOLE_REPLICATION	-0.356697	-0.0379702	-14.2858	2.93182e-39	9.36932e-38	78.3933
GOBP_NUCLEOTIDE_EXCISION_REPAIR	-0.338268	-0.0376632	-14.2757	3.25246e-39	1.0331e-37	78.2903
GOBP_MRNA_TRANSPORT	-0.376323	-0.0292615	-14.2519	4.15717e-39	1.31251e-37	78.0468
GOBP_REGULATION_OF_DNA_REPLICATION	-0.324167	-0.035897	-14.2446	4.47686e-39	1.40498e-37	77.9733
GOBP_GOLGI_VESICLE_BUDDING	-0.462528	-0.0395605	-14.2391	4.73773e-39	1.478e-37	77.9172
GOBP_REGULATION_OF_CELL_CYCLE_PHASE_TRANSITION	-0.271196	-0.0358783	-14.2273	5.34837e-39	1.65863e-37	77.7969
GOBP_PROTEIN_METHYLATION	-0.30626	-0.0308272	-14.2194	5.80331e-39	1.78913e-37	77.7159
GOBP_NEGATIVE_REGULATION_OF_ORGANELLE_ORGANIZATION	-0.195092	-0.0397457	-14.2175	5.91389e-39	1.81255e-37	77.6972
GOBP_PROTEIN_TARGETING	-0.236307	-0.0398905	-14.2081	6.51732e-39	1.98589e-37	77.6008
GOBP_POSITIVE_REGULATION_OF_ORGANELLE_ORGANIZATION	-0.196042	-0.0373397	-14.2045	6.76407e-39	2.04916e-37	77.5639
GOBP_MICROTUBULE_ANCHORING	-0.347028	-0.0308879	-14.1916	7.71733e-39	2.32451e-37	77.4331
GOBP_GLYCOSYLATION	-0.218097	-0.0449476	-14.1796	8.73165e-39	2.615e-37	77.3107
GOBP_REGULATION_OF_TRANSLATIONAL_ELONGATION	-0.278561	-0.0430234	-14.1651	1.0135e-38	3.01804e-37	77.1628
GOBP_MAINTENANCE_OF_SISTER_CHROMATID_COHESION	-0.425603	-0.0411482	-14.1636	1.02834e-38	3.04493e-37	77.1484
GOBP_HISTONE_MRNA_METABOLIC_PROCESS	-0.401083	-0.0414959	-14.1558	1.11438e-38	3.28116e-37	77.0687
GOBP_POSITIVE_REGULATION_OF_TELOMERE_MAINTENANCE	-0.356266	-0.0337712	-14.1478	1.20911e-38	3.54021e-37	76.9877
GOBP_TRANSCRIPTION_BY_RNA_POLYMERASE_III	-0.37495	-0.039342	-14.1407	1.30065e-38	3.78706e-37	76.9154
GOBP_REGULATION_OF_STEM_CELL_DIFFERENTIATION	-0.280201	-0.0304432	-14.1383	1.33266e-38	3.85882e-37	76.8912
GOBP_POSITIVE_REGULATION_OF_DNA_METABOLIC_PROCESS	-0.278669	-0.036119	-14.1364	1.35892e-38	3.91323e-37	76.8719
GOBP_HISTONE_H2A_UBIQUITINATION	-0.385082	-0.0320341	-14.1337	1.39802e-38	4.00383e-37	76.8437
GOBP_REGULATION_OF_CELLULAR_PROTEIN_CATABOLIC_PROCESS	-0.232066	-0.0390663	-14.1027	1.92016e-38	5.46932e-37	76.5289
GOBP_CELLULAR_RESPONSE_TO_HEAT	-0.258869	-0.028853	-14.0974	2.02738e-38	5.74352e-37	76.475
GOBP_REGULATION_OF_PROTEASOMAL_PROTEIN_CATABOLIC_PROCESS	-0.245369	-0.0375264	-14.0962	2.05104e-38	5.77931e-37	76.4635
GOBP_NEGATIVE_REGULATION_OF_RNA_CATABOLIC_PROCESS	-0.277471	-0.0344204	-14.0909	2.16519e-38	6.06831e-37	76.4098
GOBP_REGULATION_OF_TRANSCRIPTION_BY_RNA_POLYMERASE_III	-0.387497	-0.0383788	-14.0839	2.32758e-38	6.48876e-37	76.3381
GOBP_ENDOSOME_TO_LYSOSOME_TRANSPORT	-0.281385	-0.0277534	-14.0822	2.36711e-38	6.56404e-37	76.3214
GOBP_CELLULAR_RESPONSE_TO_RADIATION	-0.221139	-0.0436502	-14.0794	2.43678e-38	6.72167e-37	76.2926
GOBP_ACETYL_COA_BIOSYNTHETIC_PROCESS	-0.337297	-0.0374697	-14.0737	2.58282e-38	7.0872e-37	76.2349
GOBP_ORGANELLE_DISASSEMBLY	-0.249592	-0.0408448	-14.0715	2.64202e-38	7.21188e-37	76.2124
GOBP_P_BODY_ASSEMBLY	-0.412733	-0.0331872	-14.0672	2.75972e-38	7.49415e-37	76.1691
GOBP_REGULATION_OF_TRANSLATIONAL_INITIATION	-0.334044	-0.034158	-14.061	2.94081e-38	7.94473e-37	76.1061
GOBP_REGULATION_OF_RESPONSE_TO_DNA_DAMAGE_STIMULUS	-0.288807	-0.0379691	-14.0506	3.27044e-38	8.76799e-37	76.0007
GOBP_CHROMOSOME_LOCALIZATION	-0.334704	-0.049734	-14.0499	3.29294e-38	8.76799e-37	75.9939
GOBP_SISTER_CHROMATID_COHESION	-0.365431	-0.0364158	-14.0498	3.29573e-38	8.76799e-37	75.9931
GOBP_VIRAL_RNA_GENOME_REPLICATION	-0.278104	-0.0369014	-14.0397	3.65427e-38	9.67274e-37	75.8906
GOBP_DOUBLE_STRAND_BREAK_REPAIR_VIA_NONHOMOLOGOUS_END_JOINING	-0.349959	-0.0404252	-14.0293	4.0663e-38	1.07093e-36	75.7847
GOBP_GOLGI_TO_PLASMA_MEMBRANE_TRANSPORT	-0.290091	-0.0377706	-14.0238	4.29905e-38	1.12657e-36	75.7295
GOBP_REGULATION_OF_DNA_BIOSYNTHETIC_PROCESS	-0.265211	-0.0393547	-14.0066	5.12549e-38	1.33645e-36	75.555
GOBP_LYSOSOMAL_TRANSPORT	-0.276274	-0.0292938	-14.005	5.20998e-38	1.35176e-36	75.5388
GOBP_REGULATION_OF_DNA_REPAIR	-0.312568	-0.0362499	-14.0004	5.4581e-38	1.40916e-36	75.4927
GOBP_PROTEIN_LOCALIZATION_TO_CHROMOSOME	-0.381112	-0.0372093	-13.9974	5.63226e-38	1.44699e-36	75.4615
GOBP_DNA_INTEGRITY_CHECKPOINT_SIGNALING	-0.345118	-0.0403409	-13.9963	5.69434e-38	1.45581e-36	75.4507
GOBP_INTEGRATED_STRESS_RESPONSE_SIGNALING	-0.367646	-0.0449252	-13.9875	6.22706e-38	1.58427e-36	75.3619
GOBP_CELLULAR_RESPONSE_TO_LEUCINE	-0.425729	-0.0403409	-13.9809	6.6614e-38	1.68659e-36	75.2951
GOBP_ESTABLISHMENT_OF_PROTEIN_LOCALIZATION_TO_ENDOPLASMIC_RETICULUM	-0.304193	-0.0390029	-13.9614	8.12553e-38	2.0474e-36	75.098
GOBP_INTERSTRAND_CROSS_LINK_REPAIR	-0.384898	-0.0518849	-13.959	8.32689e-38	2.0881e-36	75.0737
GOBP_RESPONSE_TO_UV	-0.27961	-0.0377344	-13.9546	8.70457e-38	2.17241e-36	75.0297
GOBP_REGULATION_OF_MITOCHONDRIAL_FISSION	-0.289206	-0.0330736	-13.9527	8.88339e-38	2.20653e-36	75.0096
GOBP_REGULATION_OF_NUCLEOBASE_CONTAINING_COMPOUND_TRANSPORT	-0.461709	-0.0347959	-13.949	9.22353e-38	2.28021e-36	74.9723
GOBP_GOLGI_TO_PLASMA_MEMBRANE_PROTEIN_TRANSPORT	-0.266013	-0.0394035	-13.9413	9.96833e-38	2.45277e-36	74.8953
GOBP_SPINDLE_LOCALIZATION	-0.267759	-0.0384561	-13.9154	1.29834e-37	3.17973e-36	74.6331
GOBP_SPINDLE_ASSEMBLY	-0.276317	-0.0349569	-13.9103	1.36733e-37	3.3331e-36	74.5818
GOBP_V_D_J_RECOMBINATION	-0.360034	-0.0426132	-13.9036	1.46305e-37	3.54993e-36	74.5147
GOBP_IMPORT_INTO_NUCLEUS	-0.267263	-0.036692	-13.8761	1.93591e-37	4.67563e-36	74.2369
GOBP_METHYLATION	-0.2747	-0.0328553	-13.8687	2.08751e-37	5.01865e-36	74.1621
GOBP_STEROID_HORMONE_MEDIATED_SIGNALING_PATHWAY	-0.218397	-0.0342886	-13.8437	2.68912e-37	6.43548e-36	73.911
GOBP_REGULATION_OF_MITOTIC_CELL_CYCLE	-0.243133	-0.037255	-13.841	2.76567e-37	6.58857e-36	73.8831
GOBP_CYTOSOLIC_TRANSPORT	-0.27464	-0.0333848	-13.8402	2.78809e-37	6.61194e-36	73.8751
GOBP_RESPONSE_TO_X_RAY	-0.340138	-0.036473	-13.8243	3.27431e-37	7.73002e-36	73.7157
GOBP_DNA_BIOSYNTHETIC_PROCESS	-0.278167	-0.0405154	-13.8222	3.34546e-37	7.86258e-36	73.6944
GOBP_REGULATION_OF_CILIUM_ASSEMBLY	-0.23763	-0.0327366	-13.8168	3.53432e-37	8.26936e-36	73.6399
GOBP_REGULATION_OF_MITOTIC_CELL_CYCLE_PHASE_TRANSITION	-0.261668	-0.0354879	-13.8156	3.57581e-37	8.32926e-36	73.6283
GOBP_ORGANELLE_FISSION	-0.242428	-0.0420155	-13.8091	3.82207e-37	8.86349e-36	73.5623
GOBP_ENDOPLASMIC_RETICULUM_TUBULAR_NETWORK_ORGANIZATION	-0.3945	-0.0403638	-13.8003	4.17774e-37	9.64561e-36	73.474
GOBP_REGULATION_OF_HEMATOPOIETIC_PROGENITOR_CELL_DIFFERENTIATION	-0.351416	-0.0363632	-13.798	4.27565e-37	9.82837e-36	73.451
GOBP_NEGATIVE_REGULATION_OF_INTRACELLULAR_STEROID_HORMONE_RECEPTOR_SIGNALING_PATHWAY	-0.268543	-0.0354744	-13.7947	4.42078e-37	1.01176e-35	73.4179
GOBP_PHOSPHATIDYLINOSITOL_METABOLIC_PROCESS	-0.217599	-0.0388584	-13.7866	4.79966e-37	1.0937e-35	73.3364
GOBP_ER_OVERLOAD_RESPONSE	-0.400124	-0.0317492	-13.7849	4.88475e-37	1.10827e-35	73.319
GOBP_DOUBLE_STRAND_BREAK_REPAIR	-0.327824	-0.0385491	-13.7686	5.75946e-37	1.30109e-35	73.1556
GOBP_POSITIVE_REGULATION_OF_CELL_MORPHOGENESIS_INVOLVED_IN_DIFFERENTIATION	-0.204563	-0.0394608	-13.763	6.09714e-37	1.37146e-35	73.0991
GOBP_DNA_TEMPLATED_TRANSCRIPTION_INITIATION	-0.284836	-0.0402189	-13.7613	6.19932e-37	1.38849e-35	73.0826
GOBP_BLASTOCYST_DEVELOPMENT	-0.213793	-0.035529	-13.7562	6.52769e-37	1.45581e-35	73.0314
GOBP_REGULATION_OF_PROTEIN_CATABOLIC_PROCESS	-0.212688	-0.0363863	-13.7528	6.75954e-37	1.50113e-35	72.9968
GOBP_REGULATION_OF_DOUBLE_STRAND_BREAK_REPAIR	-0.314472	-0.0397479	-13.749	7.02148e-37	1.54842e-35	72.9591
GOBP_NLS_BEARING_PROTEIN_IMPORT_INTO_NUCLEUS	-0.337192	-0.0404634	-13.7489	7.03154e-37	1.54842e-35	72.9577
GOBP_REGULATION_OF_HEMATOPOIETIC_STEM_CELL_DIFFERENTIATION	-0.373214	-0.039934	-13.7375	7.89163e-37	1.72928e-35	72.8432
GOBP_ASPARTATE_FAMILY_AMINO_ACID_BIOSYNTHETIC_PROCESS	-0.266771	-0.0349779	-13.7371	7.91887e-37	1.72928e-35	72.8398
GOBP_PROTEIN_DENEDDYLATION	-0.458473	-0.042669	-13.7345	8.12921e-37	1.76785e-35	72.8138
GOBP_TRANSCRIPTION_INITIATION_FROM_RNA_POLYMERASE_II_PROMOTER	-0.317091	-0.041275	-13.723	9.13369e-37	1.97808e-35	72.6983
GOBP_HISTONE_H3_K36_METHYLATION	-0.402896	-0.0299158	-13.7151	9.89283e-37	2.13368e-35	72.6191
GOBP_PROTEIN_LOCALIZATION_TO_VACUOLE	-0.26682	-0.0369774	-13.7108	1.03396e-36	2.2209e-35	72.5753
GOBP_REGULATION_OF_PROTEASOMAL_UBIQUITIN_DEPENDENT_PROTEIN_CATABOLIC_PROCESS	-0.254196	-0.0366516	-13.6971	1.18742e-36	2.54012e-35	72.438
GOBP_REGULATION_OF_PROTEIN_MODIFICATION_BY_SMALL_PROTEIN_CONJUGATION_OR_REMOVAL	-0.237	-0.0375602	-13.6941	1.22326e-36	2.60615e-35	72.4085
GOBP_CELL_CYCLE_CHECKPOINT_SIGNALING	-0.337911	-0.0417798	-13.6924	1.24448e-36	2.64062e-35	72.3915
GOBP_PROTEIN_LOCALIZATION_TO_NUCLEUS	-0.26432	-0.0352352	-13.6898	1.27843e-36	2.70172e-35	72.3648
GOBP_PROTEIN_TARGETING_TO_VACUOLE	-0.327521	-0.0356112	-13.678	1.4398e-36	3.03052e-35	72.2469
GOBP_CELLULAR_RESPONSE_TO_GLUCOSE_STARVATION	-0.233165	-0.0447608	-13.6721	1.52834e-36	3.20401e-35	72.1877
GOBP_TELOMERE_ORGANIZATION	-0.307558	-0.0360979	-13.6622	1.68807e-36	3.52477e-35	72.0891
GOBP_RNA_PHOSPHODIESTER_BOND_HYDROLYSIS_EXONUCLEOLYTIC	-0.36061	-0.0323319	-13.6301	2.33447e-36	4.85514e-35	71.7676
GOBP_SNRNA_TRANSCRIPTION	-0.333775	-0.0441822	-13.6296	2.3463e-36	4.86045e-35	71.7626
GOBP_SISTER_CHROMATID_SEGREGATION	-0.348805	-0.0454198	-13.6241	2.47808e-36	5.11324e-35	71.7084
GOBP_POSITIVE_REGULATION_OF_CELL_CYCLE_PHASE_TRANSITION	-0.266748	-0.0355551	-13.6236	2.49093e-36	5.11959e-35	71.7033
GOBP_MRNA_3_END_PROCESSING	-0.370222	-0.032365	-13.6175	2.65075e-36	5.4268e-35	71.6416
GOBP_REGULATION_OF_CELL_CYCLE_G2_M_PHASE_TRANSITION	-0.298278	-0.0418154	-13.6168	2.66855e-36	5.44196e-35	71.635
GOBP_REGULATION_OF_DNA_TEMPLATED_TRANSCRIPTION_INITIATION	-0.329335	-0.0362228	-13.5997	3.17117e-36	6.44191e-35	71.4638
GOBP_REGULATION_OF_PROTEIN_STABILITY	-0.217467	-0.0370491	-13.5979	3.22724e-36	6.53049e-35	71.4465
GOBP_REGULATION_OF_UBIQUITIN_DEPENDENT_PROTEIN_CATABOLIC_PROCESS	-0.245124	-0.0371867	-13.593	3.39021e-36	6.83388e-35	71.3976
GOBP_POSITIVE_REGULATION_OF_CELL_CYCLE_G2_M_PHASE_TRANSITION	-0.326409	-0.0438921	-13.5919	3.42953e-36	6.88665e-35	71.3862
GOBP_CELLULAR_COMPONENT_DISASSEMBLY	-0.19494	-0.0345542	-13.5908	3.46769e-36	6.9367e-35	71.3752
GOBP_REGULATION_OF_DNA_DAMAGE_CHECKPOINT	-0.418438	-0.0473708	-13.5816	3.80437e-36	7.58126e-35	71.2833
GOBP_NUCLEAR_ENVELOPE_ORGANIZATION	-0.306756	-0.0416556	-13.5713	4.21931e-36	8.37629e-35	71.1806
GOBP_METAPHASE_PLATE_CONGRESSION	-0.357757	-0.0531694	-13.5617	4.64481e-36	9.1862e-35	71.0854
GOBP_MICROTUBULE_ORGANIZING_CENTER_LOCALIZATION	-0.315865	-0.0345142	-13.5578	4.83097e-36	9.51847e-35	71.0464
GOBP_NEGATIVE_REGULATION_OF_MACROAUTOPHAGY	-0.312832	-0.0342539	-13.5557	4.93384e-36	9.68474e-35	71.0255
GOBP_AUTOPHAGOSOME_ORGANIZATION	-0.263103	-0.0356746	-13.5511	5.16806e-36	1.01066e-34	70.9795
GOBP_RESPONSE_TO_HYDROXYUREA	-0.36113	-0.0430937	-13.547	5.3874e-36	1.04964e-34	70.9383
GOBP_REGULATION_OF_TELOMERASE_ACTIVITY	-0.286752	-0.0399114	-13.5316	6.29042e-36	1.22104e-34	70.7846
GOBP_GLYCEROPHOSPHOLIPID_BIOSYNTHETIC_PROCESS	-0.194181	-0.0382602	-13.5225	6.88685e-36	1.33188e-34	70.6948
GOBP_PROTEIN_ACYLATION	-0.265658	-0.031489	-13.516	7.35195e-36	1.4166e-34	70.63
GOBP_NEGATIVE_REGULATION_OF_TELOMERE_MAINTENANCE	-0.378839	-0.0352241	-13.5155	7.38917e-36	1.41856e-34	70.625
GOBP_POSITIVE_REGULATION_OF_RIG_I_SIGNALING_PATHWAY	-0.351568	-0.0380514	-13.5092	7.87581e-36	1.50647e-34	70.5617
GOBP_HISTONE_MODIFICATION	-0.287364	-0.0278856	-13.508	7.96793e-36	1.51854e-34	70.5502
GOBP_REGULATION_OF_SISTER_CHROMATID_COHESION	-0.381242	-0.0437034	-13.5021	8.45472e-36	1.60548e-34	70.4914
GOBP_RESPONSE_TO_ANTIBIOTIC	-0.213548	-0.037614	-13.4955	9.03225e-36	1.70895e-34	70.4259
GOBP_PIGMENT_GRANULE_LOCALIZATION	-0.269426	-0.0458201	-13.4905	9.50086e-36	1.79115e-34	70.3757
GOBP_VESICLE_LOCALIZATION	-0.23937	-0.0408514	-13.4837	1.01715e-35	1.91071e-34	70.3081
GOBP_MRNA_TRANSCRIPTION	-0.301032	-0.0393235	-13.4703	1.16296e-35	2.17681e-34	70.1752
GOBP_SENSORY_PERCEPTION_OF_SMELL	0.204	0.124652	13.4645	1.23224e-35	2.29829e-34	70.1179
GOBP_NEGATIVE_REGULATION_OF_ERBB_SIGNALING_PATHWAY	-0.276372	-0.0437262	-13.462	1.26351e-35	2.34825e-34	70.093
GOBP_PEPTIDYL_SERINE_MODIFICATION	-0.183489	-0.0325361	-13.4357	1.6446e-35	3.04571e-34	69.8316
GOBP_REGULATION_OF_CHROMATIN_ORGANIZATION	-0.357081	-0.0305858	-13.4325	1.69779e-35	3.13314e-34	69.8001
GOBP_PROTEIN_EXIT_FROM_ENDOPLASMIC_RETICULUM	-0.310399	-0.0361237	-13.4317	1.7127e-35	3.14956e-34	69.7914
GOBP_RNA_EXPORT_FROM_NUCLEUS	-0.390233	-0.0227852	-13.4254	1.82419e-35	3.34287e-34	69.7289
GOBP_SOMATIC_DIVERSIFICATION_OF_IMMUNOGLOBULINS_INVOLVED_IN_IMMUNE_RESPONSE	-0.269686	-0.0452035	-13.42	1.92566e-35	3.5165e-34	69.6752
GOBP_REGULATION_OF_SPINDLE_ASSEMBLY	-0.30521	-0.0328695	-13.4142	2.03987e-35	3.71214e-34	69.6181
GOBP_POSITIVE_REGULATION_OF_CELL_CYCLE_PROCESS	-0.238535	-0.0347324	-13.4131	2.0634e-35	3.74196e-34	69.6067
GOBP_PROTEIN_K48_LINKED_DEUBIQUITINATION	-0.322923	-0.0316138	-13.411	2.10652e-35	3.79605e-34	69.5862
GOBP_RESPONSE_TO_IONIZING_RADIATION	-0.289101	-0.0437993	-13.4109	2.10771e-35	3.79605e-34	69.5856
GOBP_REGULATION_OF_DNA_RECOMBINATION	-0.280083	-0.0386528	-13.4049	2.23831e-35	4.01746e-34	69.526
GOBP_PEPTIDYL_METHIONINE_MODIFICATION	-0.39701	-0.0359867	-13.4016	2.31398e-35	4.1391e-34	69.493
GOBP_NEGATIVE_REGULATION_OF_CHROMOSOME_ORGANIZATION	-0.340491	-0.0421753	-13.4007	2.33452e-35	4.16164e-34	69.4843
GOBP_CELLULAR_RESPONSE_TO_PROSTAGLANDIN_E_STIMULUS	-0.307525	-0.0359845	-13.3997	2.3574e-35	4.18818e-34	69.4746
GOBP_DNA_GEOMETRIC_CHANGE	-0.373216	-0.0333475	-13.3925	2.53333e-35	4.48554e-34	69.4032
GOBP_DSRNA_PROCESSING	-0.312546	-0.0217641	-13.3887	2.63357e-35	4.64081e-34	69.3648
GOBP_PROTEIN_DEPHOSPHORYLATION	-0.212725	-0.0378313	-13.3885	2.63874e-35	4.64081e-34	69.3628
GOBP_POSITIVE_REGULATION_OF_CELL_CYCLE_CHECKPOINT	-0.37935	-0.0543806	-13.3845	2.74514e-35	4.81181e-34	69.3236
GOBP_RETROGRADE_TRANSPORT_ENDOSOME_TO_GOLGI	-0.293483	-0.0311907	-13.3819	2.81898e-35	4.92476e-34	69.2973
GOBP_POSITIVE_REGULATION_OF_TRANSCRIPTION_ELONGATION_FROM_RNA_POLYMERASE_II_PROMOTER	-0.392899	-0.0345132	-13.3762	2.98146e-35	5.19131e-34	69.2417
GOBP_POSITIVE_REGULATION_OF_DNA_REPLICATION	-0.283945	-0.0341124	-13.3733	3.07029e-35	5.32828e-34	69.2126
GOBP_PROTEIN_LOCALIZATION_TO_CHROMOSOME_TELOMERIC_REGION	-0.418281	-0.0306914	-13.3599	3.50929e-35	6.07003e-34	69.0801
GOBP_CELL_AGING	-0.209279	-0.0366531	-13.3549	3.68978e-35	6.36123e-34	69.0304
GOBP_COLUMNAR_CUBOIDAL_EPITHELIAL_CELL_DEVELOPMENT	-0.217034	-0.0239532	-13.3493	3.90222e-35	6.70542e-34	68.9749
GOBP_NUCLEOTIDE_SUGAR_TRANSMEMBRANE_TRANSPORT	-0.411108	-0.0455659	-13.3458	4.04096e-35	6.92113e-34	68.9402
GOBP_RNA_POLYMERASE_II_PREINITIATION_COMPLEX_ASSEMBLY	-0.304693	-0.0436042	-13.3427	4.16688e-35	7.11356e-34	68.9098
GOBP_REGULATION_OF_INTRACELLULAR_PROTEIN_TRANSPORT	-0.193299	-0.0425973	-13.3413	4.22665e-35	7.19217e-34	68.8957
GOBP_PHOSPHATIDYLINOSITOL_PHOSPHATE_BIOSYNTHETIC_PROCESS	-0.260425	-0.0360754	-13.3291	4.77179e-35	8.09351e-34	68.7754
GOBP_CHROMOSOME_SEGREGATION	-0.306739	-0.0436047	-13.327	4.87252e-35	8.2377e-34	68.7547
GOBP_REGULATION_OF_RETROGRADE_PROTEIN_TRANSPORT_ER_TO_CYTOSOL	-0.30938	-0.0487528	-13.3137	5.56755e-35	9.38249e-34	68.6225
GOBP_PROTEIN_K63_LINKED_DEUBIQUITINATION	-0.327533	-0.0320011	-13.3082	5.87938e-35	9.87623e-34	68.5684
GOBP_NEGATIVE_REGULATION_OF_CELL_CYCLE_PROCESS	-0.264804	-0.0379015	-13.3011	6.30952e-35	1.05649e-33	68.4984
GOBP_REGULATION_OF_AUTOPHAGOSOME_MATURATION	-0.360336	-0.0374405	-13.2971	6.5686e-35	1.09637e-33	68.4585
GOBP_CELLULAR_RESPONSE_TO_UNFOLDED_PROTEIN	-0.268001	-0.0328873	-13.2967	6.59422e-35	1.09715e-33	68.4547
GOBP_PROTEIN_EXPORT_FROM_NUCLEUS	-0.248766	-0.0462911	-13.2953	6.68878e-35	1.10936e-33	68.4406
GOBP_ERROR_PRONE_TRANSLESION_SYNTHESIS	-0.454809	-0.0381972	-13.2938	6.78423e-35	1.12165e-33	68.4265
GOBP_NEGATIVE_REGULATION_OF_DNA_REPAIR	-0.315126	-0.0421758	-13.2896	7.07854e-35	1.16662e-33	68.3844
GOBP_TRANSLESION_SYNTHESIS	-0.37804	-0.0454814	-13.2879	7.19366e-35	1.18188e-33	68.3684
GOBP_PROTEIN_AUTOPHOSPHORYLATION	-0.19498	-0.0379786	-13.2848	7.4236e-35	1.21585e-33	68.3372
GOBP_NEGATIVE_REGULATION_OF_CELLULAR_AMIDE_METABOLIC_PROCESS	-0.221787	-0.0234888	-13.2777	7.97023e-35	1.30131e-33	68.2668
GOBP_REGULATION_OF_HISTONE_UBIQUITINATION	-0.389372	-0.0453071	-13.2687	8.71253e-35	1.41809e-33	68.1785
GOBP_POSITIVE_REGULATION_OF_INTRACELLULAR_TRANSPORT	-0.202173	-0.0414297	-13.2681	8.76513e-35	1.42223e-33	68.1725
GOBP_DNA_TEMPLATED_TRANSCRIPTION_TERMINATION	-0.377991	-0.0487727	-13.26	9.50002e-35	1.53672e-33	68.0927
GOBP_VESICLE_MEDIATED_TRANSPORT_TO_THE_PLASMA_MEMBRANE	-0.243581	-0.0406199	-13.2553	9.95568e-35	1.60547e-33	68.0462
GOBP_MITOTIC_SISTER_CHROMATID_SEGREGATION	-0.35209	-0.0486001	-13.2535	1.01351e-34	1.62939e-33	68.0285
GOBP_NEGATIVE_REGULATION_OF_CELL_CYCLE_PHASE_TRANSITION	-0.278294	-0.0373852	-13.2531	1.01752e-34	1.63083e-33	68.0246
GOBP_POSITIVE_REGULATION_OF_HISTONE_H3_K4_METHYLATION	-0.408972	-0.0296457	-13.2488	1.06184e-34	1.69667e-33	67.9823
GOBP_REGULATION_OF_GLUCOSE_METABOLIC_PROCESS	-0.143553	-0.0335974	-13.2478	1.07275e-34	1.70891e-33	67.9722
GOBP_PROTEIN_DEMANNOSYLATION	-0.382709	-0.0399462	-13.222	1.38622e-34	2.20157e-33	67.718
GOBP_RESPONSE_TO_STARVATION	-0.198559	-0.0291556	-13.2163	1.46752e-34	2.32365e-33	67.6615
GOBP_CORTICOSTEROID_RECEPTOR_SIGNALING_PATHWAY	-0.323796	-0.0448054	-13.2144	1.49534e-34	2.36057e-33	67.6429
GOBP_MITOTIC_RECOMBINATION	-0.360641	-0.0471386	-13.2136	1.50661e-34	2.37122e-33	67.6355
GOBP_IN_UTERO_EMBRYONIC_DEVELOPMENT	-0.187331	-0.0325299	-13.2102	1.55873e-34	2.4459e-33	67.6017
GOBP_CELLULAR_RESPONSE_TO_STARVATION	-0.210582	-0.0330213	-13.2067	1.6144e-34	2.52569e-33	67.567
GOBP_REGULATION_OF_PROTEIN_CONTAINING_COMPLEX_DISASSEMBLY	-0.224346	-0.0377667	-13.2046	1.64789e-34	2.57041e-33	67.5466
GOBP_TRANSPORT_ALONG_MICROTUBULE	-0.244168	-0.0408297	-13.1978	1.76275e-34	2.74141e-33	67.4798
GOBP_CELLULAR_RESPONSE_TO_UV	-0.261719	-0.0412522	-13.1931	1.84699e-34	2.86393e-33	67.4335
GOBP_RNA_STABILIZATION	-0.283371	-0.0312738	-13.1873	1.95567e-34	3.0235e-33	67.3768
GOBP_REGULATION_OF_ERAD_PATHWAY	-0.303777	-0.0385149	-13.1864	1.97428e-34	3.04329e-33	67.3674
GOBP_NUCLEAR_TRANSCRIBED_MRNA_CATABOLIC_PROCESS_NONSENSE_MEDIATED_DECAY	-0.358181	-0.0346419	-13.1834	2.03433e-34	3.12666e-33	67.3377
GOBP_MULTICELLULAR_ORGANISM_AGING	-0.231894	-0.0332905	-13.1814	2.07496e-34	3.17978e-33	67.3181
GOBP_ESTABLISHMENT_OF_SPINDLE_ORIENTATION	-0.251548	-0.0355211	-13.1757	2.19455e-34	3.35324e-33	67.2626
GOBP_CENTRIOLE_CENTRIOLE_COHESION	-0.368115	-0.0428157	-13.1737	2.23879e-34	3.4109e-33	67.2428
GOBP_RNA_3_END_PROCESSING	-0.331557	-0.0302297	-13.1725	2.26481e-34	3.44054e-33	67.2313
GOBP_POSITIVE_REGULATION_OF_VIRAL_PROCESS	-0.267383	-0.04168	-13.1694	2.33593e-34	3.53832e-33	67.2007
GOBP_REGULATION_OF_RNA_EXPORT_FROM_NUCLEUS	-0.486803	-0.0270274	-13.1678	2.37294e-34	3.58403e-33	67.1851
GOBP_NEGATIVE_REGULATION_OF_TELOMERE_MAINTENANCE_VIA_TELOMERE_LENGTHENING	-0.378039	-0.0359933	-13.1674	2.38293e-34	3.58878e-33	67.1809
GOBP_ENDOCYTIC_RECYCLING	-0.238485	-0.0419865	-13.1572	2.63738e-34	3.9606e-33	67.0803
GOBP_SMOOTHENED_SIGNALING_PATHWAY	-0.208638	-0.0319685	-13.1452	2.9707e-34	4.44842e-33	66.9623
GOBP_NON_MOTILE_CILIUM_ASSEMBLY	-0.296426	-0.0394295	-13.143	3.03607e-34	4.53334e-33	66.9408
GOBP_SINGLE_STRAND_BREAK_REPAIR	-0.371392	-0.0269752	-13.1389	3.16128e-34	4.70689e-33	66.9007
GOBP_PROTEIN_CONTAINING_COMPLEX_LOCALIZATION	-0.218122	-0.0392382	-13.1339	3.32175e-34	4.93181e-33	66.8516
GOBP_MITOTIC_G2_M_TRANSITION_CHECKPOINT	-0.334014	-0.0383627	-13.1117	4.13714e-34	6.12507e-33	66.634
GOBP_MITOCHONDRIAL_DNA_REPLICATION	-0.402487	-0.0377831	-13.1065	4.35488e-34	6.4126e-33	66.5831
GOBP_REGULATION_OF_HELICASE_ACTIVITY	-0.402923	-0.0366993	-13.1065	4.35582e-34	6.4126e-33	66.5829
GOBP_HISTONE_H3_K4_METHYLATION	-0.341826	-0.0315072	-13.1055	4.39856e-34	6.45738e-33	66.5732
GOBP_POSITIVE_REGULATION_OF_CILIUM_ASSEMBLY	-0.267265	-0.0447964	-13.0982	4.7303e-34	6.925e-33	66.5012
GOBP_CIRCADIAN_REGULATION_OF_GENE_EXPRESSION	-0.217004	-0.0333474	-13.0659	6.51027e-34	9.50427e-33	66.1845
GOBP_REGULATION_OF_CHROMATIN_ASSEMBLY_OR_DISASSEMBLY	-0.341223	-0.0297453	-13.0636	6.6583e-34	9.69338e-33	66.1622
GOBP_REGULATION_OF_MITOPHAGY	-0.329374	-0.038982	-13.0616	6.79355e-34	9.86287e-33	66.1423
GOBP_RECOMBINATIONAL_REPAIR	-0.331013	-0.0389766	-13.057	7.10496e-34	1.02865e-32	66.0979
GOBP_CYTOSKELETON_DEPENDENT_INTRACELLULAR_TRANSPORT	-0.22002	-0.0430851	-13.0474	7.81065e-34	1.1277e-32	66.004
GOBP_VACUOLE_ORGANIZATION	-0.252331	-0.0355047	-13.0379	8.58131e-34	1.23557e-32	65.9107
GOBP_REGULATION_OF_CHROMATIN_ASSEMBLY	-0.370216	-0.0253047	-13.0376	8.60802e-34	1.23602e-32	65.9076
GOBP_POSITIVE_REGULATION_OF_RNA_SPLICING	-0.304096	-0.0381918	-13.0202	1.02159e-33	1.46288e-32	65.7379
GOBP_POSITIVE_REGULATION_OF_DNA_METHYLATION_DEPENDENT_HETEROCHROMATIN_ASSEMBLY	-0.403101	-0.0423067	-13.0194	1.02948e-33	1.47017e-32	65.7302
GOBP_SNRNA_TRANSCRIPTION_BY_RNA_POLYMERASE_II	-0.3343	-0.0422219	-13.0163	1.06173e-33	1.5121e-32	65.6997
GOBP_POSITIVE_REGULATION_OF_DNA_REPAIR	-0.289158	-0.0361414	-13.0112	1.11658e-33	1.58591e-32	65.6497
GOBP_NEGATIVE_REGULATION_OF_INTRACELLULAR_ESTROGEN_RECEPTOR_SIGNALING_PATHWAY	-0.321019	-0.0322524	-13.0088	1.14372e-33	1.62006e-32	65.6259
GOBP_CELLULAR_SENESCENCE	-0.20828	-0.0365753	-13.003	1.21072e-33	1.71034e-32	65.5695
GOBP_LATE_ENDOSOME_TO_VACUOLE_TRANSPORT	-0.316638	-0.0396556	-13.0009	1.23585e-33	1.74115e-32	65.5491
GOBP_REGULATION_OF_CELL_CYCLE_CHECKPOINT	-0.336473	-0.0513603	-12.9947	1.31314e-33	1.84508e-32	65.489
GOBP_HISTONE_PHOSPHORYLATION	-0.244874	-0.0416565	-12.9942	1.32003e-33	1.84981e-32	65.4838
GOBP_SUCKLING_BEHAVIOR	-0.283113	-0.0236957	-12.9845	1.45283e-33	2.03047e-32	65.3888
GOBP_LATE_ENDOSOME_TO_LYSOSOME_TRANSPORT	-0.350679	-0.0384092	-12.9808	1.5071e-33	2.10072e-32	65.3524
GOBP_REGULATION_OF_HISTONE_H3_K4_METHYLATION	-0.358362	-0.0329028	-12.9778	1.55175e-33	2.15211e-32	65.3235
GOBP_RNA_METHYLATION	-0.359687	-0.0339985	-12.9778	1.55218e-33	2.15211e-32	65.3232
GOBP_PEPTIDYL_THREONINE_DEPHOSPHORYLATION	-0.322301	-0.0481412	-12.9709	1.66075e-33	2.29657e-32	65.2562
GOBP_POSITIVE_REGULATION_OF_INTRACELLULAR_PROTEIN_TRANSPORT	-0.204344	-0.0438097	-12.9679	1.70975e-33	2.35811e-32	65.2274
GOBP_PERK_MEDIATED_UNFOLDED_PROTEIN_RESPONSE	-0.343248	-0.0411058	-12.9671	1.7234e-33	2.37069e-32	65.2195
GOBP_PROTEIN_STABILIZATION	-0.204955	-0.0370775	-12.959	1.867e-33	2.5615e-32	65.1401
GOBP_VESICLE_MEDIATED_TRANSPORT_BETWEEN_ENDOSOMAL_COMPARTMENTS	-0.269931	-0.0394133	-12.9582	1.88206e-33	2.57543e-32	65.1322
GOBP_DNA_REPLICATION	-0.3194	-0.0371414	-12.9543	1.95443e-33	2.66749e-32	65.0948
GOBP_3_UTR_MEDIATED_MRNA_STABILIZATION	-0.291635	-0.0226534	-12.9503	2.03315e-33	2.76773e-32	65.0556
GOBP_DNA_SYNTHESIS_INVOLVED_IN_DNA_REPAIR	-0.331005	-0.0414567	-12.9461	2.11951e-33	2.87781e-32	65.0144
GOBP_ESTABLISHMENT_OF_PROTEIN_LOCALIZATION_TO_VACUOLE	-0.274612	-0.0363308	-12.9455	2.13178e-33	2.887e-32	65.0087
GOBP_MITOCHONDRIAL_RNA_PROCESSING	-0.408376	-0.0359205	-12.9436	2.17211e-33	2.93403e-32	64.9901
GOBP_PROTEASOME_ASSEMBLY	-0.38854	-0.0562662	-12.94	2.25106e-33	3.03285e-32	64.9547
GOBP_NEGATIVE_REGULATION_OF_DNA_REPLICATION	-0.305081	-0.0323678	-12.9284	2.52345e-33	3.39113e-32	64.8415
GOBP_ANAPHASE_PROMOTING_COMPLEX_DEPENDENT_CATABOLIC_PROCESS	-0.337778	-0.0428355	-12.9183	2.78542e-33	3.73361e-32	64.7436
GOBP_NUCLEAR_CHROMOSOME_SEGREGATION	-0.295674	-0.0437846	-12.9175	2.80668e-33	3.7525e-32	64.736
GOBP_POSITIVE_REGULATION_OF_TRANSCRIPTION_BY_RNA_POLYMERASE_III	-0.423758	-0.0353532	-12.9165	2.83468e-33	3.7803e-32	64.7262
GOBP_ENDOPLASMIC_RETICULUM_TO_CYTOSOL_TRANSPORT	-0.354093	-0.040984	-12.9111	2.98913e-33	3.97615e-32	64.6736
GOBP_NEGATIVE_REGULATION_OF_CELL_CYCLE	-0.227439	-0.0364727	-12.9099	3.02639e-33	4.01203e-32	64.6613
GOBP_MITOTIC_NUCLEAR_DIVISION	-0.288083	-0.0451708	-12.9097	3.03142e-33	4.01203e-32	64.6597
GOBP_INNER_MITOCHONDRIAL_MEMBRANE_ORGANIZATION	-0.30101	-0.0534164	-12.9065	3.12744e-33	4.1287e-32	64.6288
GOBP_MITOCHONDRIAL_CALCIUM_ION_TRANSMEMBRANE_TRANSPORT	-0.306598	-0.0384705	-12.9033	3.22788e-33	4.25059e-32	64.5974
GOBP_REGULATION_OF_CIRCADIAN_RHYTHM	-0.222622	-0.0320622	-12.8998	3.34039e-33	4.38771e-32	64.5635
GOBP_ACETYL_COA_BIOSYNTHETIC_PROCESS_FROM_PYRUVATE	-0.392388	-0.0312678	-12.8967	3.44305e-33	4.50687e-32	64.5335
GOBP_REGULATION_OF_NUCLEOCYTOPLASMIC_TRANSPORT	-0.24826	-0.0396735	-12.8966	3.4483e-33	4.50687e-32	64.532
GOBP_MITOTIC_METAPHASE_PLATE_CONGRESSION	-0.359534	-0.0534818	-12.8925	3.58794e-33	4.6777e-32	64.4926
GOBP_POSITIVE_REGULATION_OF_RESPONSE_TO_DNA_DAMAGE_STIMULUS	-0.263123	-0.0364603	-12.8744	4.28428e-33	5.57169e-32	64.3168
GOBP_REGULATION_OF_ISOTYPE_SWITCHING	-0.260901	-0.0418922	-12.8591	4.97997e-33	6.4604e-32	64.1676
GOBP_EARLY_ENDOSOME_TO_GOLGI_TRANSPORT	-0.371119	-0.0382885	-12.8575	5.06006e-33	6.5481e-32	64.1518
GOBP_POSITIVE_REGULATION_OF_PROTEOLYSIS_INVOLVED_IN_CELLULAR_PROTEIN_CATABOLIC_PROCESS	-0.213088	-0.0413732	-12.8532	5.27753e-33	6.81269e-32	64.1101
GOBP_PHOSPHOLIPID_BIOSYNTHETIC_PROCESS	-0.190169	-0.0373112	-12.8508	5.40072e-33	6.95459e-32	64.0873
GOBP_POSITIVE_REGULATION_OF_UBIQUITIN_DEPENDENT_PROTEIN_CATABOLIC_PROCESS	-0.214741	-0.0397735	-12.8409	5.94903e-33	7.64188e-32	63.9914
GOBP_REGULATION_OF_IRE1_MEDIATED_UNFOLDED_PROTEIN_RESPONSE	-0.377249	-0.0364382	-12.8312	6.54283e-33	8.3841e-32	63.8971
GOBP_MODULATION_BY_HOST_OF_VIRAL_GENOME_REPLICATION	-0.290569	-0.0302631	-12.8288	6.69673e-33	8.54711e-32	63.8741
GOBP_POSITIVE_REGULATION_OF_ENDOPLASMIC_RETICULUM_UNFOLDED_PROTEIN_RESPONSE	-0.333313	-0.0363661	-12.8288	6.70266e-33	8.54711e-32	63.8732
GOBP_PROTEIN_SUMOYLATION	-0.235924	-0.0349998	-12.8277	6.77138e-33	8.61379e-32	63.8631
GOBP_POSITIVE_REGULATION_OF_PROTEIN_BINDING	-0.20257	-0.036992	-12.8119	7.90714e-33	1.00342e-31	63.7094
GOBP_PEPTIDYL_LYSINE_MODIFICATION	-0.261691	-0.0288304	-12.8105	8.01017e-33	1.01404e-31	63.6965
GOBP_GOLGI_TO_ENDOSOME_TRANSPORT	-0.328381	-0.0373151	-12.8092	8.11764e-33	1.02318e-31	63.6833
GOBP_TELOMERE_MAINTENANCE_VIA_RECOMBINATION	-0.389131	-0.047502	-12.8091	8.12141e-33	1.02318e-31	63.6829
GOBP_NUCLEAR_TRANSCRIBED_MRNA_CATABOLIC_PROCESS	-0.345379	-0.0285533	-12.8083	8.18906e-33	1.02727e-31	63.6747
GOBP_INTRACELLULAR_RECEPTOR_SIGNALING_PATHWAY	-0.183441	-0.0343859	-12.8082	8.1931e-33	1.02727e-31	63.6742
GOBP_NEGATIVE_REGULATION_OF_TELOMERE_MAINTENANCE_VIA_TELOMERASE	-0.385982	-0.0378701	-12.7999	8.88761e-33	1.11169e-31	63.5935
GOBP_PEPTIDYL_LYSINE_METHYLATION	-0.296469	-0.0291551	-12.7924	9.5661e-33	1.19371e-31	63.5206
GOBP_CELLULAR_RESPONSE_TO_LEUCINE_STARVATION	-0.367211	-0.043245	-12.7871	1.00721e-32	1.25387e-31	63.4695
GOBP_POSITIVE_REGULATION_OF_PROTEIN_CATABOLIC_PROCESS	-0.198696	-0.0383434	-12.776	1.12308e-32	1.3948e-31	63.3616
GOBP_PROTEIN_N_LINKED_GLYCOSYLATION	-0.287289	-0.0454001	-12.7683	1.21086e-32	1.50027e-31	63.287
GOBP_RNA_CATABOLIC_PROCESS	-0.292111	-0.0296406	-12.7599	1.3137e-32	1.62384e-31	63.2062
GOBP_POSITIVE_REGULATION_OF_DOUBLE_STRAND_BREAK_REPAIR	-0.307886	-0.0382338	-12.7578	1.34149e-32	1.6543e-31	63.1855
GOBP_AMINOACYL_TRNA_METABOLISM_INVOLVED_IN_TRANSLATIONAL_FIDELITY	-0.405804	-0.0456856	-12.7412	1.57651e-32	1.93955e-31	63.0255
GOBP_ESTABLISHMENT_OF_PROTEIN_LOCALIZATION_TO_MEMBRANE	-0.209731	-0.041464	-12.74	1.59549e-32	1.95831e-31	63.0136
GOBP_ARACHIDONIC_ACID_METABOLIC_PROCESS	0.205764	-0.0137945	12.7273	1.80644e-32	2.21204e-31	62.8905
GOBP_POSITIVE_REGULATION_OF_MRNA_METABOLIC_PROCESS	-0.32219	-0.0311409	-12.721	1.91981e-32	2.34539e-31	62.8302
GOBP_MITOCHONDRION_LOCALIZATION	-0.217298	-0.0397534	-12.7042	2.26145e-32	2.75634e-31	62.6679
GOBP_POSITIVE_REGULATION_OF_METAPHASE_ANAPHASE_TRANSITION_OF_CELL_CYCLE	-0.34103	-0.0461629	-12.7038	2.26996e-32	2.76029e-31	62.6641
GOBP_HEMATOPOIETIC_STEM_CELL_DIFFERENTIATION	-0.281561	-0.0384123	-12.6925	2.53355e-32	3.07369e-31	62.5553
GOBP_POSITIVE_REGULATION_OF_PROTEIN_LOCALIZATION	-0.163563	-0.0361921	-12.686	2.69933e-32	3.26724e-31	62.4925
GOBP_REGULATION_OF_CELL_MORPHOGENESIS_INVOLVED_IN_DIFFERENTIATION	-0.186126	-0.0395267	-12.6854	2.716e-32	3.27985e-31	62.4863
GOBP_HISTONE_METHYLATION	-0.300331	-0.028749	-12.6787	2.89876e-32	3.4925e-31	62.4218
GOBP_HISTONE_H2A_MONOUBIQUITINATION	-0.353909	-0.0317432	-12.675	3.00603e-32	3.61344e-31	62.3858
GOBP_REGULATION_OF_PHOSPHOPROTEIN_PHOSPHATASE_ACTIVITY	-0.226368	-0.0375545	-12.6675	3.23128e-32	3.87532e-31	62.3142
GOBP_HISTONE_DEUBIQUITINATION	-0.381837	-0.0318646	-12.6656	3.29145e-32	3.93847e-31	62.2959
GOBP_NON_MEMBRANE_BOUNDED_ORGANELLE_ASSEMBLY	-0.215434	-0.0351143	-12.656	3.61498e-32	4.31575e-31	62.203
GOBP_TETRAPYRROLE_BIOSYNTHETIC_PROCESS	-0.233323	-0.0410723	-12.6526	3.73787e-32	4.45232e-31	62.1698
GOBP_PROTEIN_ACETYLATION	-0.273259	-0.0283233	-12.6507	3.80592e-32	4.52309e-31	62.152
GOBP_NEGATIVE_REGULATION_OF_TOR_SIGNALING	-0.249728	-0.0383642	-12.6486	3.88575e-32	4.60751e-31	62.1314
GOBP_ENDOPLASMIC_RETICULUM_MANNOSE_TRIMMING	-0.411346	-0.0327674	-12.6418	4.15177e-32	4.91183e-31	62.0658
GOBP_ESTABLISHMENT_OF_SISTER_CHROMATID_COHESION	-0.398209	-0.0311394	-12.6286	4.71814e-32	5.5642e-31	61.939
GOBP_MITOTIC_DNA_INTEGRITY_CHECKPOINT_SIGNALING	-0.301744	-0.0388468	-12.6283	4.73305e-32	5.5642e-31	61.9359
GOBP_PROTEIN_DEGLYCOSYLATION	-0.321593	-0.041419	-12.6282	4.73504e-32	5.5642e-31	61.9355
GOBP_NUCLEOBASE_BIOSYNTHETIC_PROCESS	-0.333456	-0.0459761	-12.6199	5.13482e-32	6.02049e-31	61.8552
GOBP_REGULATION_OF_DOUBLE_STRAND_BREAK_REPAIR_VIA_HOMOLOGOUS_RECOMBINATION	-0.317166	-0.0388273	-12.619	5.17838e-32	6.05801e-31	61.8468
GOBP_POST_TRANSLATIONAL_PROTEIN_MODIFICATION	-0.274873	-0.0487466	-12.6144	5.41659e-32	6.32257e-31	61.8022
GOBP_EXTRACELLULAR_VESICLE_BIOGENESIS	-0.251359	-0.0447211	-12.6076	5.78364e-32	6.73601e-31	61.7372
GOBP_PROTEIN_O_LINKED_MANNOSYLATION	-0.259112	-0.0450866	-12.6059	5.88027e-32	6.82693e-31	61.7208
GOBP_RNA_DESTABILIZATION	-0.332303	-0.0278392	-12.6058	5.88776e-32	6.82693e-31	61.7196
GOBP_TRANSCRIPTION_PREINITIATION_COMPLEX_ASSEMBLY	-0.308242	-0.0395406	-12.6049	5.93653e-32	6.86829e-31	61.7114
GOBP_AUTOPHAGY_OF_MITOCHONDRION	-0.23819	-0.038436	-12.6013	6.14713e-32	7.09627e-31	61.6768
GOBP_MRNA_CATABOLIC_PROCESS	-0.296974	-0.0288684	-12.5948	6.54813e-32	7.54258e-31	61.6142
GOBP_MRNA_MODIFICATION	-0.384852	-0.0360893	-12.5922	6.71763e-32	7.72085e-31	61.5889
GOBP_POSITIVE_REGULATION_OF_TRANSCRIPTION_BY_RNA_POLYMERASE_I	-0.384279	-0.0310552	-12.5893	6.90664e-32	7.92072e-31	61.5614
GOBP_DE_NOVO_PROTEIN_FOLDING	-0.274934	-0.0390941	-12.5876	7.0208e-32	8.03406e-31	61.5451
GOBP_TRNA_METABOLIC_PROCESS	-0.330439	-0.0328856	-12.5841	7.26717e-32	8.29787e-31	61.511
GOBP_NEGATIVE_REGULATION_OF_DOUBLE_STRAND_BREAK_REPAIR_VIA_HOMOLOGOUS_RECOMBINATION	-0.34023	-0.0426216	-12.5783	7.68146e-32	8.75186e-31	61.456
GOBP_POSITIVE_REGULATION_OF_CELLULAR_PROTEIN_CATABOLIC_PROCESS	-0.20449	-0.041315	-12.5721	8.16303e-32	9.28036e-31	61.3958
GOBP_MRNA_CLEAVAGE_INVOLVED_IN_MRNA_PROCESSING	-0.409392	-0.0212918	-12.5705	8.284e-32	9.3975e-31	61.3812
GOBP_NUCLEAR_MEMBRANE_ORGANIZATION	-0.302327	-0.040636	-12.5695	8.36561e-32	9.46958e-31	61.3715
GOBP_REGULATION_OF_MRNA_CATABOLIC_PROCESS	-0.28906	-0.0298668	-12.5661	8.65035e-32	9.7708e-31	61.3383
GOBP_REGULATION_OF_HISTONE_MODIFICATION	-0.256369	-0.0299465	-12.5616	9.03636e-32	1.01849e-30	61.295
GOBP_POSITIVE_REGULATION_OF_PROTEIN_SUMOYLATION	-0.301627	-0.0420013	-12.5565	9.49197e-32	1.06754e-30	61.2463
GOBP_HEMATOPOIETIC_STEM_CELL_PROLIFERATION	-0.208047	-0.0413048	-12.555	9.62608e-32	1.08031e-30	61.2324
GOBP_POSITIVE_REGULATION_OF_RESPONSE_TO_ENDOPLASMIC_RETICULUM_STRESS	-0.274729	-0.0338491	-12.5526	9.85812e-32	1.10398e-30	61.2088
GOBP_POSITIVE_REGULATION_OF_ISOTYPE_SWITCHING	-0.273649	-0.0417172	-12.5518	9.92995e-32	1.10966e-30	61.2016
GOBP_REGULATION_OF_SMOOTHENED_SIGNALING_PATHWAY	-0.219979	-0.0293977	-12.5464	1.04687e-31	1.16737e-30	61.1492
GOBP_NEGATIVE_REGULATION_OF_AUTOPHAGY	-0.227707	-0.0370947	-12.5441	1.07053e-31	1.19122e-30	61.1271
GOBP_REGULATION_OF_CHROMOSOME_SEGREGATION	-0.330688	-0.0421483	-12.5217	1.32903e-31	1.47573e-30	60.9127
GOBP_COTRANSLATIONAL_PROTEIN_TARGETING_TO_MEMBRANE	-0.297322	-0.0401427	-12.5098	1.49129e-31	1.6524e-30	60.7986
GOBP_MITOTIC_CELL_CYCLE_CHECKPOINT_SIGNALING	-0.305454	-0.0424921	-12.5095	1.49458e-31	1.65256e-30	60.7964
GOBP_REGULATION_OF_NUCLEAR_CELL_CYCLE_DNA_REPLICATION	-0.311339	-0.0462652	-12.5051	1.56086e-31	1.7222e-30	60.7534
GOBP_MICROTUBULE_ANCHORING_AT_CENTROSOME	-0.352635	-0.0298351	-12.5014	1.61745e-31	1.7809e-30	60.7181
GOBP_ESTABLISHMENT_OF_PROTEIN_LOCALIZATION_TO_PLASMA_MEMBRANE	-0.237404	-0.0422447	-12.4934	1.74742e-31	1.91997e-30	60.6415
GOBP_POSITIVE_REGULATION_OF_UBIQUITIN_PROTEIN_TRANSFERASE_ACTIVITY	-0.251923	-0.0357114	-12.4926	1.76031e-31	1.93008e-30	60.6343
GOBP_REGULATION_OF_MITOTIC_SPINDLE_ASSEMBLY	-0.292855	-0.0397975	-12.4848	1.89795e-31	2.07665e-30	60.5596
GOBP_POSITIVE_REGULATION_OF_DNA_TEMPLATED_TRANSCRIPTION_ELONGATION	-0.36932	-0.0302469	-12.4791	2.00622e-31	2.19054e-30	60.5047
GOBP_CELLULAR_RESPONSE_TO_STEROID_HORMONE_STIMULUS	-0.170675	-0.0265252	-12.4782	2.02364e-31	2.20497e-30	60.4961
GOBP_RESPONSE_TO_MISFOLDED_PROTEIN	-0.340276	-0.0397644	-12.4699	2.1917e-31	2.37937e-30	60.4171
GOBP_POSITIVE_REGULATION_OF_CHROMATIN_ORGANIZATION	-0.382349	-0.0378061	-12.4698	2.19278e-31	2.37937e-30	60.4166
GOBP_REGULATION_OF_EMBRYONIC_DEVELOPMENT	-0.208278	-0.02461	-12.4587	2.44068e-31	2.63795e-30	60.3104
GOBP_PIGMENT_BIOSYNTHETIC_PROCESS	-0.192992	-0.0324949	-12.4587	2.44115e-31	2.63795e-30	60.3102
GOBP_POSITIVE_REGULATION_OF_PROTEASOMAL_UBIQUITIN_DEPENDENT_PROTEIN_CATABOLIC_PROCESS	-0.225014	-0.0396241	-12.4559	2.50801e-31	2.70462e-30	60.2835
GOBP_GLYCOPROTEIN_BIOSYNTHETIC_PROCESS	-0.19003	-0.0416546	-12.4554	2.52037e-31	2.71237e-30	60.2786
GOBP_REGULATION_OF_CELL_CYCLE_G1_S_PHASE_TRANSITION	-0.198517	-0.0308548	-12.4449	2.78901e-31	2.99533e-30	60.1782
GOBP_POSITIVE_REGULATION_OF_DNA_RECOMBINATION	-0.281054	-0.0370631	-12.44	2.92389e-31	3.13376e-30	60.1314
GOBP_CYTOPLASMIC_TRANSLATIONAL_INITIATION	-0.352836	-0.0408469	-12.4352	3.06308e-31	3.27624e-30	60.0854
GOBP_REGULATION_OF_CYTOPLASMIC_TRANSLATIONAL_ELONGATION	-0.297142	-0.0418108	-12.4267	3.32442e-31	3.54853e-30	60.0042
GOBP_POSITIVE_REGULATION_OF_PROTEIN_AUTOPHOSPHORYLATION	-0.234786	-0.0427886	-12.4108	3.87259e-31	4.12525e-30	59.853
GOBP_PROTEIN_LOCALIZATION_TO_MITOCHONDRION	-0.237594	-0.0413514	-12.4087	3.95348e-31	4.20288e-30	59.8325
GOBP_TRANSLATIONAL_INITIATION	-0.299212	-0.0349576	-12.4069	4.0228e-31	4.26792e-30	59.8153
GOBP_NEGATIVE_REGULATION_OF_EPIDERMAL_GROWTH_FACTOR_ACTIVATED_RECEPTOR_ACTIVITY	-0.294776	-0.0392838	-12.4065	4.03695e-31	4.27427e-30	59.8118
GOBP_MITOCHONDRIAL_GENE_EXPRESSION	-0.338455	-0.0364114	-12.4058	4.06447e-31	4.29473e-30	59.8051
GOBP_RIBONUCLEOSIDE_MONOPHOSPHATE_BIOSYNTHETIC_PROCESS	-0.223331	-0.0440762	-12.4038	4.14083e-31	4.36661e-30	59.7866
GOBP_EMBRYONIC_BRAIN_DEVELOPMENT	-0.290221	-0.0314454	-12.3999	4.30025e-31	4.52562e-30	59.7492
GOBP_POSITIVE_REGULATION_OF_CELLULAR_AMIDE_METABOLIC_PROCESS	-0.233093	-0.0350997	-12.3989	4.34228e-31	4.5607e-30	59.7396
GOBP_SELECTIVE_AUTOPHAGY	-0.246611	-0.0381449	-12.3986	4.35605e-31	4.56601e-30	59.7364
GOBP_MITOPHAGY	-0.255263	-0.0429262	-12.3914	4.66608e-31	4.88122e-30	59.6683
GOBP_METAPHASE_ANAPHASE_TRANSITION_OF_CELL_CYCLE	-0.338285	-0.046811	-12.3901	4.72456e-31	4.93255e-30	59.656
GOBP_TRNA_METHYLATION	-0.356733	-0.0327853	-12.3883	4.80725e-31	5.0089e-30	59.6388
GOBP_REGULATION_OF_CELL_PROJECTION_ASSEMBLY	-0.181379	-0.0394818	-12.378	5.31141e-31	5.52323e-30	59.54
GOBP_HISTONE_H3_K4_TRIMETHYLATION	-0.365721	-0.0329238	-12.3754	5.44194e-31	5.64777e-30	59.5159
GOBP_DNA_STRAND_ELONGATION	-0.382751	-0.039188	-12.3726	5.59118e-31	5.79118e-30	59.4891
GOBP_DNA_RECOMBINATION	-0.26876	-0.0395484	-12.3722	5.61207e-31	5.80135e-30	59.4854
GOBP_REGULATION_OF_TRANSLATIONAL_FIDELITY	-0.360541	-0.0421039	-12.3685	5.81663e-31	6.00098e-30	59.4499
GOBP_RESPONSE_TO_LEUKEMIA_INHIBITORY_FACTOR	-0.170691	-0.0380488	-12.3666	5.92112e-31	6.09678e-30	59.4323
GOBP_NEGATIVE_REGULATION_OF_MITOTIC_CELL_CYCLE	-0.238776	-0.0366794	-12.3613	6.2301e-31	6.40235e-30	59.3819
GOBP_MITOTIC_DNA_REPLICATION_CHECKPOINT_SIGNALING	-0.408883	-0.0552571	-12.3547	6.63894e-31	6.80914e-30	59.3189
GOBP_BRAIN_MORPHOGENESIS	-0.240033	-0.0316034	-12.353	6.74832e-31	6.9078e-30	59.3027
GOBP_MRNA_CLEAVAGE	-0.358737	-0.0291018	-12.352	6.8171e-31	6.96461e-30	59.2927
GOBP_CIRCADIAN_RHYTHM	-0.182606	-0.0333184	-12.3517	6.83433e-31	6.96862e-30	59.2902
GOBP_GOLGI_RIBBON_FORMATION	-0.365083	-0.0331502	-12.3469	7.15388e-31	7.28029e-30	59.2449
GOBP_RNA_POLYADENYLATION	-0.35314	-0.028561	-12.3371	7.86321e-31	7.98665e-30	59.1512
GOBP_NEGATIVE_REGULATION_OF_DNA_RECOMBINATION	-0.266532	-0.0415605	-12.3362	7.92939e-31	8.03829e-30	59.1429
GOBP_CELLULAR_RESPONSE_TO_IONIZING_RADIATION	-0.260662	-0.0466769	-12.3357	7.96742e-31	8.06125e-30	59.1382
GOBP_REGULATION_OF_ENDOPLASMIC_RETICULUM_UNFOLDED_PROTEIN_RESPONSE	-0.286747	-0.0395035	-12.3323	8.23002e-31	8.31089e-30	59.106
GOBP_PEPTIDYL_LYSINE_ACETYLATION	-0.275439	-0.028417	-12.3265	8.69939e-31	8.76798e-30	59.0511
GOBP_POSITIVE_REGULATION_OF_TELOMERASE_ACTIVITY	-0.252375	-0.0407777	-12.3263	8.72193e-31	8.77383e-30	59.0485
GOBP_NEGATIVE_REGULATION_OF_PROTEIN_EXIT_FROM_ENDOPLASMIC_RETICULUM	-0.310918	-0.0428295	-12.3228	9.02093e-31	9.05722e-30	59.0151
GOBP_PROTEIN_LOCALIZATION_TO_LYSOSOME	-0.238931	-0.0392497	-12.3167	9.55897e-31	9.57908e-30	58.9577
GOBP_REGULATION_OF_VACUOLE_ORGANIZATION	-0.267283	-0.034529	-12.315	9.71966e-31	9.72152e-30	58.9412
GOBP_CELL_CYCLE_DNA_REPLICATION	-0.350123	-0.0434308	-12.3139	9.82162e-31	9.80478e-30	58.9309
GOBP_REGULATION_OF_CHROMOSOME_SEPARATION	-0.326314	-0.0460605	-12.3125	9.95776e-31	9.92179e-30	58.9172
GOBP_RAP_PROTEIN_SIGNAL_TRANSDUCTION	-0.297973	-0.0408506	-12.3032	1.08763e-30	1.08165e-29	58.8298
GOBP_GLUTAMINE_METABOLIC_PROCESS	-0.265655	-0.0285225	-12.2993	1.12937e-30	1.12103e-29	58.7925
GOBP_REGULATION_OF_DEPHOSPHORYLATION	-0.200354	-0.0373893	-12.2863	1.27931e-30	1.26746e-29	58.669
GOBP_NEGATIVE_REGULATION_OF_CELL_CYCLE_G2_M_PHASE_TRANSITION	-0.288901	-0.0408903	-12.2781	1.38306e-30	1.36766e-29	58.5917
GOBP_POSITIVE_REGULATION_OF_CHROMOSOME_SEPARATION	-0.317015	-0.044906	-12.2753	1.42114e-30	1.40267e-29	58.5648
GOBP_MAINTENANCE_OF_ORGANELLE_LOCATION	-0.34271	-0.0177443	-12.267	1.53815e-30	1.51531e-29	58.4864
GOBP_MRNA_EXPORT_FROM_NUCLEUS	-0.373941	-0.0270329	-12.2667	1.54238e-30	1.51662e-29	58.4837
GOBP_REGULATION_OF_CHROMOSOME_CONDENSATION	-0.462036	-0.034416	-12.2622	1.61029e-30	1.58043e-29	58.441
GOBP_REGULATION_OF_DNA_DEPENDENT_DNA_REPLICATION	-0.339973	-0.0414731	-12.2604	1.63835e-30	1.60497e-29	58.4239
GOBP_RIBOSOMAL_SUBUNIT_EXPORT_FROM_NUCLEUS	-0.43202	-0.0389239	-12.2574	1.68589e-30	1.64846e-29	58.3956
GOBP_DEPHOSPHORYLATION	-0.180568	-0.0364876	-12.2556	1.71651e-30	1.67527e-29	58.3778
GOBP_LIPOPROTEIN_BIOSYNTHETIC_PROCESS	-0.220807	-0.0399383	-12.2522	1.77224e-30	1.72645e-29	58.3461
GOBP_POSITIVE_REGULATION_OF_TRANSLATION	-0.255665	-0.0322677	-12.2444	1.90966e-30	1.85687e-29	58.2721
GOBP_ESTABLISHMENT_OF_PIGMENT_GRANULE_LOCALIZATION	-0.24991	-0.0484059	-12.2312	2.16591e-30	2.10213e-29	58.1474
GOBP_REGULATION_OF_PROTEIN_ACETYLATION	-0.207676	-0.0325773	-12.2282	2.23004e-30	2.16038e-29	58.1185
GOBP_RESPONSE_TO_HEAT	-0.180005	-0.0323858	-12.218	2.45699e-30	2.37585e-29	58.0224
GOBP_PROTEIN_DESTABILIZATION	-0.227047	-0.042246	-12.2177	2.4644e-30	2.37863e-29	58.0195
GOBP_GLYCEROLIPID_BIOSYNTHETIC_PROCESS	-0.164114	-0.0395429	-12.217	2.48042e-30	2.38969e-29	58.013
GOBP_ORGANELLE_MEMBRANE_FUSION	-0.211515	-0.0429498	-12.2163	2.49789e-30	2.4021e-29	58.0061
GOBP_REGULATION_OF_GENE_SILENCING_BY_RNA	-0.256423	-0.03462	-12.2135	2.56517e-30	2.46228e-29	57.9798
GOBP_REGULATION_OF_PROTEIN_LOCALIZATION_TO_CHROMOSOME_TELOMERIC_REGION	-0.456175	-0.029253	-12.2097	2.6596e-30	2.54825e-29	57.9439
GOBP_GPI_ANCHOR_METABOLIC_PROCESS	-0.297933	-0.0456679	-12.2055	2.768e-30	2.64728e-29	57.9044
GOBP_NCRNA_TRANSCRIPTION	-0.299873	-0.0410413	-12.1914	3.1664e-30	3.02279e-29	57.7711
GOBP_POSITIVE_REGULATION_OF_CELL_PROJECTION_ORGANIZATION	-0.178079	-0.0359188	-12.1696	3.89608e-30	3.71261e-29	57.5657
GOBP_ATTACHMENT_OF_MITOTIC_SPINDLE_MICROTUBULES_TO_KINETOCHORE	-0.404944	-0.0571615	-12.1542	4.51192e-30	4.29165e-29	57.4203
GOBP_GMP_BIOSYNTHETIC_PROCESS	-0.332746	-0.0409873	-12.1525	4.58687e-30	4.35504e-29	57.404
GOBP_RHYTHMIC_PROCESS	-0.164349	-0.0317688	-12.1506	4.67174e-30	4.4276e-29	57.3858
GOBP_DNA_DOUBLE_STRAND_BREAK_PROCESSING	-0.308376	-0.0339082	-12.1394	5.19438e-30	4.91403e-29	57.2808
GOBP_POSITIVE_REGULATION_OF_POSTTRANSCRIPTIONAL_GENE_SILENCING	-0.296426	-0.0326238	-12.1322	5.56334e-30	5.2536e-29	57.2128
GOBP_REGULATION_OF_MRNA_METABOLIC_PROCESS	-0.290114	-0.0284546	-12.1306	5.64695e-30	5.32296e-29	57.198
GOBP_POSITIVE_REGULATION_OF_PLASMA_MEMBRANE_BOUNDED_CELL_PROJECTION_ASSEMBLY	-0.193385	-0.043177	-12.1225	6.10045e-30	5.74012e-29	57.1215
GOBP_NUCLEAR_TRANSCRIBED_MRNA_CATABOLIC_PROCESS_DEADENYLATION_DEPENDENT_DECAY	-0.333997	-0.0258279	-12.1223	6.11219e-30	5.74086e-29	57.1196
GOBP_REGULATION_OF_HEXOKINASE_ACTIVITY	-0.266621	-0.0462902	-12.1153	6.53165e-30	6.12386e-29	57.0539
GOBP_HISTONE_H2A_ACETYLATION	-0.341945	-0.0397707	-12.1145	6.58057e-30	6.15871e-29	57.0465
GOBP_POSITIVE_REGULATION_OF_TRANSCRIPTION_OF_NUCLEOLAR_LARGE_RRNA_BY_RNA_POLYMERASE_I	-0.381677	-0.0408222	-12.1093	6.91699e-30	6.46202e-29	56.9971
GOBP_MITOTIC_G2_DNA_DAMAGE_CHECKPOINT_SIGNALING	-0.302197	-0.0356652	-12.1043	7.25119e-30	6.76218e-29	56.9503
GOBP_REGULATION_OF_MICROTUBULE_CYTOSKELETON_ORGANIZATION	-0.218494	-0.0337231	-12.1026	7.3682e-30	6.8591e-29	56.9345
GOBP_NEGATIVE_REGULATION_OF_RESPONSE_TO_DNA_DAMAGE_STIMULUS	-0.242112	-0.0430459	-12.0913	8.20096e-30	7.62079e-29	56.8284
GOBP_TRANSCRIPTION_ELONGATION_FROM_RNA_POLYMERASE_II_PROMOTER	-0.321095	-0.0345594	-12.0877	8.4862e-30	7.87189e-29	56.7945
GOBP_MICROTUBULE_NUCLEATION	-0.283272	-0.0333899	-12.0658	1.04445e-29	9.66254e-29	56.5889
GOBP_MULTIVESICULAR_BODY_ORGANIZATION	-0.323706	-0.0439959	-12.0657	1.04535e-29	9.66254e-29	56.588
GOBP_POSITIVE_REGULATION_OF_DNA_BIOSYNTHETIC_PROCESS	-0.242281	-0.0380711	-12.0652	1.05062e-29	9.69416e-29	56.583
GOBP_PROTEIN_O_LINKED_GLYCOSYLATION	-0.186382	-0.0437136	-12.0599	1.10502e-29	1.01782e-28	56.533
GOBP_SMALL_RNA_LOADING_ONTO_RISC	-0.45317	-0.0245035	-12.0592	1.1118e-29	1.02227e-28	56.527
GOBP_UDP_N_ACETYLGLUCOSAMINE_METABOLIC_PROCESS	-0.319606	-0.0406447	-12.0586	1.11826e-29	1.02641e-28	56.5212
GOBP_CEREBRAL_CORTEX_DEVELOPMENT	-0.232677	-0.0331092	-12.0578	1.12728e-29	1.03288e-28	56.5133
GOBP_PIGMENT_ACCUMULATION	-0.333669	-0.0637416	-12.0555	1.15166e-29	1.05338e-28	56.4921
GOBP_NEGATIVE_REGULATION_OF_MRNA_CATABOLIC_PROCESS	-0.232075	-0.0344901	-12.042	1.30952e-29	1.19568e-28	56.3648
GOBP_REGULATION_OF_HISTONE_METHYLATION	-0.307326	-0.0263025	-12.041	1.32087e-29	1.20394e-28	56.3563
GOBP_REGULATION_OF_HEMATOPOIETIC_STEM_CELL_PROLIFERATION	-0.283093	-0.0403637	-12.0352	1.39574e-29	1.26998e-28	56.3017
GOBP_RIG_I_SIGNALING_PATHWAY	-0.292991	-0.0442646	-12.0298	1.46878e-29	1.33412e-28	56.2511
GOBP_CELLULAR_NITROGEN_COMPOUND_CATABOLIC_PROCESS	-0.208041	-0.0333519	-12.0267	1.51291e-29	1.37183e-28	56.2218
GOBP_DNA_DEPENDENT_DNA_REPLICATION	-0.329745	-0.0389379	-12.025	1.53672e-29	1.39101e-28	56.2064
GOBP_AUTOPHAGY_OF_NUCLEUS	-0.32995	-0.0302273	-12.0169	1.659e-29	1.49911e-28	56.1305
GOBP_REGULATION_OF_VESICLE_SIZE	-0.375455	-0.044564	-12.0142	1.70233e-29	1.53562e-28	56.105
GOBP_IMP_BIOSYNTHETIC_PROCESS	-0.294138	-0.0371749	-12.0063	1.83456e-29	1.65205e-28	56.0309
GOBP_REGULATION_OF_RRNA_PROCESSING	-0.385997	-0.0403052	-12.0014	1.92108e-29	1.72699e-28	55.9852
GOBP_REGULATION_OF_PROTEIN_DEPHOSPHORYLATION	-0.219714	-0.0415165	-11.9943	2.05536e-29	1.84455e-28	55.9183
GOBP_REGULATION_OF_CYTOPLASMIC_TRANSLATION	-0.252619	-0.0385633	-11.9799	2.35335e-29	2.10836e-28	55.7842
GOBP_CELLULAR_RESPONSE_TO_EXTRACELLULAR_STIMULUS	-0.162813	-0.0339065	-11.9766	2.42967e-29	2.17302e-28	55.7526
GOBP_PROTEIN_LOCALIZATION_TO_CHROMATIN	-0.329701	-0.0415353	-11.9671	2.65571e-29	2.37113e-28	55.6645
GOBP_RNA_MODIFICATION	-0.304029	-0.0334871	-11.9563	2.94137e-29	2.62173e-28	55.5633
GOBP_POSITIVE_REGULATION_OF_ERYTHROCYTE_DIFFERENTIATION	-0.247608	-0.0292521	-11.9519	3.06603e-29	2.72819e-28	55.5222
GOBP_NEGATIVE_REGULATION_OF_MITOTIC_CELL_CYCLE_PHASE_TRANSITION	-0.247906	-0.036233	-11.9493	3.14273e-29	2.79171e-28	55.4977
GOBP_INTRACELLULAR_PROTEIN_TRANSMEMBRANE_TRANSPORT	-0.257309	-0.0412587	-11.9472	3.20563e-29	2.84276e-28	55.4781
GOBP_TELOMERE_MAINTENANCE_IN_RESPONSE_TO_DNA_DAMAGE	-0.368467	-0.0470307	-11.9269	3.88154e-29	3.43634e-28	55.2886
GOBP_FORMATION_OF_EXTRACHROMOSOMAL_CIRCULAR_DNA	-0.333095	-0.0441042	-11.9254	3.93721e-29	3.47975e-28	55.2745
GOBP_NEGATIVE_REGULATION_OF_SIGNAL_TRANSDUCTION_BY_P53_CLASS_MEDIATOR	-0.237701	-0.0421951	-11.9246	3.96378e-29	3.49734e-28	55.2678
GOBP_HISTONE_H2B_UBIQUITINATION	-0.386757	-0.0342276	-11.9234	4.01133e-29	3.53334e-28	55.256
GOBP_COENZYME_A_METABOLIC_PROCESS	-0.234018	-0.049871	-11.9138	4.39113e-29	3.8614e-28	55.1664
GOBP_PEPTIDYL_LYSINE_TRIMETHYLATION	-0.301138	-0.0331845	-11.8834	5.84544e-29	5.13165e-28	54.8831
GOBP_RESPONSE_TO_NERVE_GROWTH_FACTOR	-0.225447	-0.028997	-11.8764	6.24173e-29	5.47038e-28	54.8181
GOBP_POSITIVE_REGULATION_OF_HISTONE_METHYLATION	-0.321587	-0.025583	-11.876	6.26448e-29	5.48116e-28	54.8145
GOBP_REGULATION_OF_RIG_I_SIGNALING_PATHWAY	-0.274891	-0.042349	-11.8746	6.34892e-29	5.54579e-28	54.8013
GOBP_SMOOTHENED_SIGNALING_PATHWAY_INVOLVED_IN_DORSAL_VENTRAL_NEURAL_TUBE_PATTERNING	-0.320487	-0.0324033	-11.8724	6.48044e-29	5.65125e-28	54.781
GOBP_SCF_DEPENDENT_PROTEASOMAL_UBIQUITIN_DEPENDENT_PROTEIN_CATABOLIC_PROCESS	-0.234246	-0.0407846	-11.8565	7.52489e-29	6.55116e-28	54.633
GOBP_MAINTENANCE_OF_CELL_NUMBER	-0.244587	-0.0255738	-11.8552	7.61758e-29	6.62085e-28	54.6209
GOBP_POSITIVE_REGULATION_OF_PROTEIN_ACETYLATION	-0.193895	-0.034158	-11.8505	7.96148e-29	6.9083e-28	54.5771
GOBP_SUBSTRATE_DEPENDENT_CELL_MIGRATION	-0.257088	-0.0394722	-11.8493	8.04684e-29	6.97082e-28	54.5666
GOBP_MIRNA_METABOLIC_PROCESS	-0.34459	-0.0276079	-11.8404	8.74723e-29	7.56505e-28	54.4839
GOBP_ORGANELLE_TRANSPORT_ALONG_MICROTUBULE	-0.25846	-0.0464151	-11.835	9.20692e-29	7.9495e-28	54.4332
GOBP_RESPONSE_TO_STEROL_DEPLETION	-0.282474	-0.0364974	-11.8186	1.07278e-28	9.24743e-28	54.2818
GOBP_PEROXISOMAL_TRANSPORT	-0.294166	-0.0416021	-11.8113	1.14892e-28	9.88747e-28	54.2139
GOBP_CELLULAR_RESPONSE_TO_STEROL_DEPLETION	-0.288994	-0.0366269	-11.8056	1.21212e-28	1.04143e-27	54.1608
GOBP_PRE_MIRNA_PROCESSING	-0.382726	-0.0215499	-11.8043	1.22741e-28	1.05139e-27	54.1484
GOBP_ATTACHMENT_OF_SPINDLE_MICROTUBULES_TO_KINETOCHORE	-0.372112	-0.0521454	-11.8042	1.22773e-28	1.05139e-27	54.1482
GOBP_NUCLEIC_ACID_PHOSPHODIESTER_BOND_HYDROLYSIS	-0.245135	-0.0350034	-11.7742	1.62624e-28	1.39039e-27	53.8698
GOBP_HETEROCHROMATIN_ORGANIZATION	-0.293452	-0.0296816	-11.7696	1.69839e-28	1.44972e-27	53.8268
GOBP_C_TERMINAL_PROTEIN_AMINO_ACID_MODIFICATION	-0.312698	-0.0545265	-11.7671	1.73777e-28	1.48092e-27	53.8041
GOBP_POSITIVE_REGULATION_OF_CELL_CYCLE_G1_S_PHASE_TRANSITION	-0.197053	-0.029574	-11.7606	1.84685e-28	1.57132e-27	53.7438
GOBP_CHROMOSOME_SEPARATION	-0.300301	-0.0450911	-11.7485	2.06706e-28	1.75583e-27	53.6323
GOBP_PERICARDIUM_DEVELOPMENT	-0.244199	-0.0158131	-11.7451	2.13508e-28	1.81068e-27	53.6002
GOBP_POSITIVE_REGULATION_OF_DOUBLE_STRAND_BREAK_REPAIR_VIA_HOMOLOGOUS_RECOMBINATION	-0.317004	-0.0387074	-11.7381	2.2794e-28	1.92994e-27	53.5354
GOBP_HISTONE_H3_K9_METHYLATION	-0.294626	-0.0248874	-11.7264	2.54128e-28	2.1482e-27	53.4277
GOBP_ORGANIC_CYCLIC_COMPOUND_CATABOLIC_PROCESS	-0.177505	-0.0332683	-11.7182	2.74247e-28	2.31454e-27	53.3523
GOBP_NEGATIVE_REGULATION_OF_RHO_PROTEIN_SIGNAL_TRANSDUCTION	-0.258658	-0.0380149	-11.7107	2.94285e-28	2.47966e-27	53.2825
GOBP_PROTEIN_TARGETING_TO_LYSOSOME	-0.291913	-0.0382639	-11.7076	3.02837e-28	2.54762e-27	53.2541
GOBP_TRNA_WOBBLE_BASE_MODIFICATION	-0.326755	-0.0457724	-11.7045	3.11665e-28	2.61769e-27	53.2257
GOBP_TYPE_B_PANCREATIC_CELL_DEVELOPMENT	-0.221916	-0.0193839	-11.7016	3.20361e-28	2.68642e-27	53.1984
GOBP_ANDROGEN_RECEPTOR_SIGNALING_PATHWAY	-0.218008	-0.0377249	-11.7009	3.22386e-28	2.69908e-27	53.1922
GOBP_PRIMARY_MIRNA_PROCESSING	-0.347318	-0.0224304	-11.6985	3.29617e-28	2.75522e-27	53.1702
GOBP_CELLULAR_PIGMENTATION	-0.205714	-0.0416319	-11.6944	3.42328e-28	2.85691e-27	53.1327
GOBP_NEGATIVE_REGULATION_OF_MRNA_METABOLIC_PROCESS	-0.257736	-0.0319584	-11.693	3.47027e-28	2.89152e-27	53.1192
GOBP_HISTONE_H4_ACETYLATION	-0.293726	-0.0287891	-11.6852	3.73212e-28	3.10477e-27	53.0472
GOBP_NEGATIVE_REGULATION_OF_RECEPTOR_SIGNALING_PATHWAY_VIA_JAK_STAT	-0.220971	-0.0422303	-11.6801	3.91229e-28	3.24949e-27	53.0005
GOBP_MITOTIC_INTRA_S_DNA_DAMAGE_CHECKPOINT_SIGNALING	-0.344281	-0.0472801	-11.664	4.54425e-28	3.76842e-27	52.8523
GOBP_MACROMOLECULE_DEACYLATION	-0.215099	-0.0390495	-11.6583	4.79048e-28	3.96633e-27	52.8
GOBP_ARP2_3_COMPLEX_MEDIATED_ACTIN_NUCLEATION	-0.223702	-0.0508857	-11.6556	4.9138e-28	4.06202e-27	52.7748
GOBP_SRP_DEPENDENT_COTRANSLATIONAL_PROTEIN_TARGETING_TO_MEMBRANE	-0.261004	-0.0390236	-11.6485	5.24912e-28	4.33238e-27	52.7095
GOBP_ESCRT_COMPLEX_DISASSEMBLY	-0.388774	-0.0394772	-11.6396	5.70052e-28	4.69755e-27	52.6278
GOBP_ZINC_ION_TRANSPORT	-0.202418	-0.0501797	-11.6315	6.14667e-28	5.05725e-27	52.5532
GOBP_POSITIVE_REGULATION_OF_ESTABLISHMENT_OF_PROTEIN_LOCALIZATION	-0.148162	-0.0362441	-11.6176	6.99359e-28	5.74504e-27	52.4254
GOBP_GLYCOLIPID_BIOSYNTHETIC_PROCESS	-0.194544	-0.0472125	-11.6154	7.13572e-28	5.85263e-27	52.4054
GOBP_N_TERMINAL_PROTEIN_AMINO_ACID_MODIFICATION	-0.243044	-0.0388244	-11.6152	7.15085e-28	5.85588e-27	52.4034
GOBP_REGULATION_OF_TRANSCRIPTION_ELONGATION_FROM_RNA_POLYMERASE_II_PROMOTER	-0.335945	-0.0302026	-11.615	7.16529e-28	5.85855e-27	52.4014
GOBP_POSITIVE_REGULATION_OF_TELOMERE_CAPPING	-0.229086	-0.039628	-11.6056	7.81656e-28	6.38109e-27	52.3152
GOBP_REGULATION_OF_MICROTUBULE_BINDING	-0.312522	-0.0498435	-11.6042	7.91783e-28	6.45371e-27	52.3025
GOBP_DETERMINATION_OF_ADULT_LIFESPAN	-0.311981	-0.0419054	-11.582	9.72692e-28	7.91596e-27	52.0987
GOBP_POSITIVE_REGULATION_OF_VACUOLE_ORGANIZATION	-0.26478	-0.0433893	-11.581	9.81764e-28	7.9774e-27	52.0895
GOBP_CELLULAR_RESPONSE_TO_INCREASED_OXYGEN_LEVELS	-0.313004	-0.0406789	-11.5711	1.07573e-27	8.72743e-27	51.999
GOBP_POSITIVE_REGULATION_OF_ESTABLISHMENT_OF_PROTEIN_LOCALIZATION_TO_MITOCHONDRION	-0.227822	-0.0455177	-11.5688	1.09895e-27	8.902e-27	51.9779
GOBP_DNA_CONFORMATION_CHANGE	-0.256184	-0.0302867	-11.5658	1.13e-27	9.1394e-27	51.9503
GOBP_REGULATION_OF_CELL_AGING	-0.199696	-0.0392228	-11.5629	1.16133e-27	9.37829e-27	51.9232
GOBP_POSITIVE_REGULATION_OF_AUTOPHAGY	-0.21345	-0.0350173	-11.5625	1.16559e-27	9.3982e-27	51.9196
GOBP_REGULATION_OF_PROTEIN_SERINE_THREONINE_KINASE_ACTIVITY	-0.140142	-0.0393161	-11.5574	1.22098e-27	9.82971e-27	51.8737
GOBP_FORMATION_OF_TRANSLATION_PREINITIATION_COMPLEX	-0.37228	-0.0410055	-11.5391	1.44665e-27	1.16287e-26	51.7057
GOBP_PROTEIN_TRANSMEMBRANE_TRANSPORT	-0.238571	-0.0413783	-11.537	1.47491e-27	1.18377e-26	51.6866
GOBP_REGULATION_OF_PROTEIN_EXIT_FROM_ENDOPLASMIC_RETICULUM	-0.23355	-0.0392364	-11.5357	1.49352e-27	1.19687e-26	51.6742
GOBP_CENTRIOLE_ASSEMBLY	-0.287749	-0.0359704	-11.5296	1.57968e-27	1.26399e-26	51.6186
GOBP_NEGATIVE_REGULATION_OF_SMALL_GTPASE_MEDIATED_SIGNAL_TRANSDUCTION	-0.196576	-0.0384747	-11.5274	1.61229e-27	1.28811e-26	51.5984
GOBP_REGULATION_OF_PROTEIN_LOCALIZATION_TO_NUCLEUS	-0.223894	-0.0344111	-11.527	1.61851e-27	1.29111e-26	51.5946
GOBP_INTRACELLULAR_TRANSPORT_OF_VIRUS	-0.282827	-0.0227625	-11.526	1.63272e-27	1.30047e-26	51.586
GOBP_REGULATION_OF_EARLY_ENDOSOME_TO_LATE_ENDOSOME_TRANSPORT	-0.304297	-0.0381459	-11.5239	1.66496e-27	1.32414e-26	51.5666
GOBP_NUCLEAR_BODY_ORGANIZATION	-0.249978	-0.0404888	-11.5212	1.7063e-27	1.35496e-26	51.5423
GOBP_STEM_CELL_DIFFERENTIATION	-0.153357	-0.0235461	-11.5188	1.74469e-27	1.38334e-26	51.5203
GOBP_MITOCHONDRIAL_TRANSLATION	-0.340472	-0.0362236	-11.5185	1.74993e-27	1.3854e-26	51.5173
GOBP_SNRNA_METABOLIC_PROCESS	-0.296087	-0.0287052	-11.5096	1.90044e-27	1.50229e-26	51.4356
GOBP_EXTRAEMBRYONIC_MEMBRANE_DEVELOPMENT	-0.325348	-0.0407724	-11.5057	1.96933e-27	1.5544e-26	51.4004
GOBP_MITOCHONDRIAL_TRANSCRIPTION	-0.274151	-0.0449747	-11.5002	2.07156e-27	1.63264e-26	51.3503
GOBP_MICROTUBULE_BASED_TRANSPORT	-0.200109	-0.0376503	-11.4942	2.19033e-27	1.72365e-26	51.2951
GOBP_PROTEIN_TARGETING_TO_PEROXISOME	-0.308482	-0.0378258	-11.4899	2.27923e-27	1.79092e-26	51.2557
GOBP_TRNA_MODIFICATION	-0.326337	-0.0315406	-11.4833	2.42147e-27	1.89984e-26	51.1958
GOBP_MULTIVESICULAR_BODY_SORTING_PATHWAY	-0.242658	-0.0446312	-11.4814	2.46361e-27	1.93001e-26	51.1787
GOBP_PHOSPHATIDYLINOSITOL_3_PHOSPHATE_BIOSYNTHETIC_PROCESS	-0.357167	-0.0219575	-11.4773	2.55793e-27	2.00091e-26	51.1415
GOBP_HISTONE_H4_K20_METHYLATION	-0.395853	-0.0365408	-11.4743	2.62972e-27	2.05223e-26	51.1141
GOBP_REGULATION_OF_VIRAL_INDUCED_CYTOPLASMIC_PATTERN_RECOGNITION_RECEPTOR_SIGNALING_PATHWAY	-0.261364	-0.0426731	-11.4743	2.63137e-27	2.05223e-26	51.1135
GOBP_REGULATION_OF_SIGNAL_TRANSDUCTION_BY_P53_CLASS_MEDIATOR	-0.228259	-0.0391812	-11.4717	2.69536e-27	2.09902e-26	51.0897
GOBP_TROPHECTODERMAL_CELL_DIFFERENTIATION	-0.26067	-0.0358587	-11.4674	2.80319e-27	2.17975e-26	51.0509
GOBP_REGULATION_OF_ESTABLISHMENT_OF_PROTEIN_LOCALIZATION_TO_CHROMOSOME	-0.431429	-0.0342607	-11.4672	2.80866e-27	2.18077e-26	51.0489
GOBP_PROTEIN_LOCALIZATION_TO_PHAGOPHORE_ASSEMBLY_SITE	-0.297627	-0.0368731	-11.4655	2.8533e-27	2.21215e-26	51.0333
GOBP_REGULATION_OF_STEM_CELL_POPULATION_MAINTENANCE	-0.229146	-0.02688	-11.4607	2.98254e-27	2.30893e-26	50.9895
GOBP_REGULATION_OF_AUTOPHAGY_OF_MITOCHONDRION	-0.23513	-0.0391803	-11.4592	3.02225e-27	2.33623e-26	50.9764
GOBP_TELOMERASE_RNA_LOCALIZATION	-0.399794	-0.0401716	-11.458	3.05614e-27	2.35894e-26	50.9653
GOBP_TRIGLYCERIDE_RICH_LIPOPROTEIN_PARTICLE_REMODELING	0.268901	-0.00945735	11.45	3.29068e-27	2.53624e-26	50.8921
GOBP_REGULATION_OF_PROTEIN_SUMOYLATION	-0.24847	-0.0312425	-11.4427	3.51783e-27	2.70733e-26	50.826
GOBP_ISOTYPE_SWITCHING_TO_IGG_ISOTYPES	-0.281656	-0.0474826	-11.4417	3.55165e-27	2.72935e-26	50.8166
GOBP_CYTOPLASMIC_SEQUESTERING_OF_PROTEIN	-0.240426	-0.0468012	-11.4393	3.62934e-27	2.78497e-26	50.7952
GOBP_POSITIVE_REGULATION_OF_ERAD_PATHWAY	-0.292178	-0.0428288	-11.4382	3.66876e-27	2.8111e-26	50.7845
GOBP_CYTOPLASMIC_TRANSLATIONAL_ELONGATION	-0.267665	-0.0396812	-11.428	4.02631e-27	3.08057e-26	50.6924
GOBP_GLYCOPROTEIN_METABOLIC_PROCESS	-0.169029	-0.0396132	-11.4277	4.03767e-27	3.08476e-26	50.6896
GOBP_REGULATION_OF_DOUBLE_STRAND_BREAK_REPAIR_VIA_NONHOMOLOGOUS_END_JOINING	-0.297897	-0.0382649	-11.4258	4.11083e-27	3.13608e-26	50.6718
GOBP_GLANDULAR_EPITHELIAL_CELL_DEVELOPMENT	-0.212049	-0.0256361	-11.4222	4.24884e-27	3.23665e-26	50.6392
GOBP_ENDOSOME_TRANSPORT_VIA_MULTIVESICULAR_BODY_SORTING_PATHWAY	-0.268567	-0.044875	-11.422	4.258e-27	3.23892e-26	50.637
GOBP_BLASTOCYST_FORMATION	-0.218026	-0.0393456	-11.4207	4.30811e-27	3.27229e-26	50.6254
GOBP_PROTEIN_TARGETING_TO_MEMBRANE	-0.192865	-0.0405124	-11.4182	4.40723e-27	3.34274e-26	50.6029
GOBP_POSITIVE_REGULATION_OF_CELLULAR_COMPONENT_BIOGENESIS	-0.151251	-0.0359162	-11.4165	4.47792e-27	3.39144e-26	50.5872
GOBP_POSITIVE_REGULATION_OF_MRNA_3_END_PROCESSING	-0.314614	-0.0396417	-11.4146	4.55406e-27	3.44413e-26	50.5705
GOBP_ESTABLISHMENT_OF_PROTEIN_LOCALIZATION_TO_TELOMERE	-0.397864	-0.0283333	-11.4096	4.77148e-27	3.60336e-26	50.5243
GOBP_PROTEIN_TARGETING_TO_MITOCHONDRION	-0.226444	-0.0456888	-11.4064	4.91241e-27	3.70445e-26	50.4955
GOBP_PURINE_NUCLEOSIDE_MONOPHOSPHATE_BIOSYNTHETIC_PROCESS	-0.245851	-0.04498	-11.4029	5.07164e-27	3.81903e-26	50.4639
GOBP_NEURAL_CREST_FORMATION	-0.247561	-0.0510445	-11.3861	5.91726e-27	4.44941e-26	50.3113
GOBP_CENTROMERIC_SISTER_CHROMATID_COHESION	-0.32376	-0.0494418	-11.3814	6.17651e-27	4.63769e-26	50.2688
GOBP_MEMBRANE_FUSION	-0.172211	-0.0386249	-11.375	6.55363e-27	4.91381e-26	50.2102
GOBP_MIDBODY_ABSCISSION	-0.295127	-0.0507987	-11.3337	9.56699e-27	7.16294e-26	49.8357
GOBP_RNA_PHOSPHODIESTER_BOND_HYDROLYSIS	-0.253949	-0.0330429	-11.3326	9.65783e-27	7.22064e-26	49.8264
GOBP_REGULATION_OF_MITOCHONDRIAL_GENE_EXPRESSION	-0.337144	-0.0363808	-11.3286	1.00218e-26	7.48212e-26	49.7897
GOBP_NEGATIVE_REGULATION_OF_NUCLEAR_DIVISION	-0.281923	-0.0458452	-11.3245	1.0401e-26	7.75412e-26	49.753
GOBP_REGULATION_OF_EXOSOMAL_SECRETION	-0.240571	-0.0393974	-11.322	1.0648e-26	7.92701e-26	49.7298
GOBP_HISTONE_MRNA_CATABOLIC_PROCESS	-0.371569	-0.0323579	-11.3201	1.0828e-26	8.04958e-26	49.7132
GOBP_SYNAPTIC_VESICLE_CYTOSKELETAL_TRANSPORT	-0.281251	-0.049877	-11.3194	1.08975e-26	8.08981e-26	49.7068
GOBP_VIRAL_GENE_EXPRESSION	-0.251626	-0.0422375	-11.3024	1.27341e-26	9.43983e-26	49.5527
GOBP_MULTICELLULAR_ORGANISM_GROWTH	-0.14548	-0.0269831	-11.3007	1.29296e-26	9.57118e-26	49.5376
GOBP_POSITIVE_REGULATION_OF_CELL_GROWTH	-0.165124	-0.0329993	-11.3003	1.29783e-26	9.59372e-26	49.5339
GOBP_PROTEIN_LOCALIZATION_TO_CHROMOSOME_CENTROMERIC_REGION	-0.391758	-0.0484435	-11.299	1.31351e-26	9.69595e-26	49.522
GOBP_TRANSCRIPTION_BY_RNA_POLYMERASE_I	-0.31764	-0.03435	-11.2982	1.32242e-26	9.74797e-26	49.5153
GOBP_VIRAL_RELEASE_FROM_HOST_CELL	-0.283195	-0.0370884	-11.2957	1.35313e-26	9.96029e-26	49.4926
GOBP_PROTEIN_FOLDING	-0.212483	-0.0417752	-11.2729	1.66682e-26	1.22522e-25	49.2862
GOBP_TORC1_SIGNALING	-0.236248	-0.0394404	-11.2721	1.67919e-26	1.23258e-25	49.2789
GOBP_REGULATION_OF_RESPONSE_TO_ENDOPLASMIC_RETICULUM_STRESS	-0.22698	-0.0375057	-11.2681	1.74145e-26	1.2765e-25	49.2429
GOBP_POSITIVE_REGULATION_OF_EXOSOMAL_SECRETION	-0.239073	-0.0449505	-11.2673	1.75305e-26	1.2832e-25	49.2363
GOBP_TRNA_PROCESSING	-0.30636	-0.0334143	-11.2589	1.89253e-26	1.38337e-25	49.1605
GOBP_POSITIVE_REGULATION_OF_CYCLIN_DEPENDENT_PROTEIN_KINASE_ACTIVITY	-0.212473	-0.0382927	-11.2541	1.97853e-26	1.44422e-25	49.1165
GOBP_NEGATIVE_REGULATION_OF_ENDOPLASMIC_RETICULUM_UNFOLDED_PROTEIN_RESPONSE	-0.27118	-0.0481323	-11.2503	2.04649e-26	1.49175e-25	49.0831
GOBP_PEPTIDYL_LYSINE_MONOMETHYLATION	-0.294018	-0.0387142	-11.2354	2.34378e-26	1.70608e-25	48.9489
GOBP_HEMATOPOIETIC_PROGENITOR_CELL_DIFFERENTIATION	-0.204498	-0.0355583	-11.2322	2.41483e-26	1.75536e-25	48.9193
GOBP_NCRNA_CATABOLIC_PROCESS	-0.268043	-0.0383594	-11.2287	2.49118e-26	1.80835e-25	48.8885
GOBP_CENTROSOME_SEPARATION	-0.320207	-0.0572729	-11.2198	2.70215e-26	1.95878e-25	48.8081
GOBP_NEGATIVE_REGULATION_OF_TELOMERASE_ACTIVITY	-0.318881	-0.0496297	-11.2162	2.7926e-26	2.02155e-25	48.7755
GOBP_PYRAMIDAL_NEURON_DEVELOPMENT	-0.247469	-0.0428043	-11.2159	2.79913e-26	2.02348e-25	48.7732
GOBP_POSITIVE_REGULATION_OF_NUCLEOCYTOPLASMIC_TRANSPORT	-0.234967	-0.0390295	-11.2069	3.03899e-26	2.19385e-25	48.6918
GOBP_NEGATIVE_REGULATION_OF_STEM_CELL_DIFFERENTIATION	-0.273904	-0.0413011	-11.2027	3.15684e-26	2.27579e-25	48.6541
GOBP_REGULATION_OF_MRNA_PROCESSING	-0.289873	-0.0284749	-11.1909	3.51219e-26	2.52848e-25	48.5486
GOBP_POSITIVE_REGULATION_OF_AXON_EXTENSION	-0.249174	-0.0397709	-11.1885	3.5895e-26	2.5806e-25	48.527
GOBP_DNA_TEMPLATED_TRANSCRIPTION_ELONGATION	-0.305847	-0.0297421	-11.1856	3.68708e-26	2.64712e-25	48.5005
GOBP_DNA_DAMAGE_RESPONSE_SIGNAL_TRANSDUCTION_BY_P53_CLASS_MEDIATOR	-0.211388	-0.0436504	-11.1853	3.69537e-26	2.64944e-25	48.4983
GOBP_NEGATIVE_REGULATION_OF_CELLULAR_PROTEIN_CATABOLIC_PROCESS	-0.221077	-0.0357325	-11.1814	3.83071e-26	2.74272e-25	48.4627
GOBP_HISTONE_H3_K36_DEMETHYLATION	-0.330627	-0.0440353	-11.1791	3.91043e-26	2.79598e-25	48.4423
GOBP_PIGMENTATION	-0.164552	-0.0345105	-11.1767	3.99553e-26	2.85294e-25	48.421
GOBP_POSITIVE_REGULATION_OF_MRNA_PROCESSING	-0.256923	-0.0410946	-11.1683	4.31197e-26	3.0747e-25	48.3455
GOBP_DEMETHYLATION	-0.222058	-0.0379455	-11.1668	4.37362e-26	3.11442e-25	48.3315
GOBP_POSITIVE_REGULATION_OF_SMOOTHENED_SIGNALING_PATHWAY	-0.212987	-0.0319517	-11.1655	4.42443e-26	3.14633e-25	48.3201
GOBP_SIGNAL_TRANSDUCTION_BY_P53_CLASS_MEDIATOR	-0.190855	-0.0387216	-11.1605	4.63056e-26	3.28845e-25	48.275
GOBP_EPOXYGENASE_P450_PATHWAY	0.255763	0.0138146	11.1567	4.79191e-26	3.39843e-25	48.2411
GOBP_REGULATION_OF_MRNA_SPLICING_VIA_SPLICEOSOME	-0.283583	-0.0287591	-11.1543	4.89613e-26	3.46765e-25	48.2198
GOBP_NUCLEOSIDE_MONOPHOSPHATE_BIOSYNTHETIC_PROCESS	-0.206305	-0.0463784	-11.1511	5.0408e-26	3.5653e-25	48.191
GOBP_REGULATION_OF_MRNA_3_END_PROCESSING	-0.326088	-0.0335278	-11.1499	5.09399e-26	3.59806e-25	48.1806
GOBP_PEPTIDYL_ASPARAGINE_MODIFICATION	-0.329143	-0.0453963	-11.1475	5.20863e-26	3.67408e-25	48.1586
GOBP_NEURONAL_STEM_CELL_POPULATION_MAINTENANCE	-0.299694	-0.0315425	-11.1401	5.57108e-26	3.92447e-25	48.092
GOBP_VIRAL_TRANSLATION	-0.354884	-0.0465811	-11.1279	6.2189e-26	4.37493e-25	47.9832
GOBP_PRO_B_CELL_DIFFERENTIATION	-0.334653	-0.0266384	-11.1158	6.93879e-26	4.87482e-25	47.8748
GOBP_CELLULAR_RESPONSE_TO_REACTIVE_NITROGEN_SPECIES	-0.218383	-0.0363038	-11.1145	7.01934e-26	4.92482e-25	47.8633
GOBP_REGULATION_OF_ATTACHMENT_OF_SPINDLE_MICROTUBULES_TO_KINETOCHORE	-0.378379	-0.0548824	-11.1124	7.15515e-26	5.01339e-25	47.8444
GOBP_NUCLEAR_TRANSCRIBED_MRNA_POLY_A_TAIL_SHORTENING	-0.316899	-0.0257763	-11.1107	7.26818e-26	5.08578e-25	47.8289
GOBP_NEGATIVE_REGULATION_OF_PROTEIN_CATABOLIC_PROCESS	-0.179638	-0.0315397	-11.107	7.51463e-26	5.25123e-25	47.7959
GOBP_POSITIVE_REGULATION_OF_MUSCLE_HYPERTROPHY	-0.218853	-0.0150439	-11.1032	7.77336e-26	5.42479e-25	47.7624
GOBP_HEPARAN_SULFATE_PROTEOGLYCAN_BIOSYNTHETIC_PROCESS	-0.253716	-0.042403	-11.1005	7.97063e-26	5.55507e-25	47.7376
GOBP_NEGATIVE_REGULATION_OF_HISTONE_MODIFICATION	-0.264327	-0.0384346	-11.0998	8.01852e-26	5.58101e-25	47.7317
GOBP_PROTEIN_AUTO_ADP_RIBOSYLATION	-0.300712	-0.0346081	-11.0957	8.32091e-26	5.78381e-25	47.695
GOBP_ADIPOSE_TISSUE_DEVELOPMENT	-0.186044	-0.0342503	-11.0954	8.34662e-26	5.79399e-25	47.692
GOBP_CERAMIDE_TRANSPORT	-0.25135	-0.0415542	-11.0948	8.38942e-26	5.816e-25	47.6869
GOBP_RESPONSE_TO_EPIDERMAL_GROWTH_FACTOR	-0.223626	-0.0358055	-11.0937	8.47285e-26	5.86608e-25	47.6771
GOBP_REGULATION_OF_MITOTIC_SISTER_CHROMATID_SEGREGATION	-0.30767	-0.0472963	-11.0838	9.26213e-26	6.40407e-25	47.589
GOBP_CELLULAR_RESPONSE_TO_KETONE	-0.156118	-0.0262824	-11.0806	9.53538e-26	6.57654e-25	47.5602
GOBP_CELL_CELL_SIGNALING_BY_WNT	-0.147691	-0.0289183	-11.0806	9.53668e-26	6.57654e-25	47.5601
GOBP_POSITIVE_REGULATION_OF_CELL_SUBSTRATE_JUNCTION_ORGANIZATION	-0.230723	-0.0384001	-11.0736	1.01553e-25	6.99392e-25	47.4979
GOBP_REGULATION_OF_CYTOPLASMIC_TRANSPORT	-0.28539	-0.0346957	-11.0728	1.02278e-25	7.03464e-25	47.4909
GOBP_GOLGI_TO_VACUOLE_TRANSPORT	-0.257763	-0.0402275	-11.0699	1.05024e-25	7.21405e-25	47.4646
GOBP_POSITIVE_REGULATION_OF_DENDRITE_MORPHOGENESIS	-0.27162	-0.0453315	-11.0574	1.17557e-25	8.06433e-25	47.3531
GOBP_DNA_REPLICATION_INITIATION	-0.332061	-0.0422897	-11.0278	1.53452e-25	1.0513e-24	47.0894
GOBP_PROTEIN_LOCALIZATION_TO_CILIUM	-0.228896	-0.0352566	-11.0276	1.53733e-25	1.05185e-24	47.0876
GOBP_PEPTIDYL_TYROSINE_DEPHOSPHORYLATION	-0.180775	-0.0373564	-11.0142	1.73443e-25	1.18515e-24	46.9683
GOBP_COMMISSURAL_NEURON_AXON_GUIDANCE	-0.297647	-0.0296206	-11.0102	1.79806e-25	1.22703e-24	46.9326
GOBP_MITOCHONDRIAL_PROTEIN_PROCESSING	-0.307785	-0.0462862	-11.0097	1.80615e-25	1.23095e-24	46.9282
GOBP_MITOCHONDRIAL_DNA_METABOLIC_PROCESS	-0.30073	-0.0428609	-11.0077	1.83809e-25	1.25109e-24	46.9108
GOBP_PYRAMIDAL_NEURON_DIFFERENTIATION	-0.249293	-0.0424254	-11.0052	1.88105e-25	1.27868e-24	46.888
GOBP_RETICULOPHAGY	-0.269998	-0.0448613	-11.0026	1.92446e-25	1.30649e-24	46.8654
GOBP_GTP_METABOLIC_PROCESS	-0.246331	-0.0544451	-11.0001	1.96908e-25	1.33505e-24	46.8427
GOBP_NEGATIVE_REGULATION_OF_GENE_EXPRESSION_EPIGENETIC	-0.284697	-0.0284971	-10.9929	2.10041e-25	1.42225e-24	46.7788
GOBP_POSITIVE_REGULATION_OF_MACROAUTOPHAGY	-0.232671	-0.0340615	-10.9922	2.11409e-25	1.42967e-24	46.7724
GOBP_ADULT_FEEDING_BEHAVIOR	0.262836	0.00444196	10.9916	2.12593e-25	1.43583e-24	46.7669
GOBP_ESTABLISHMENT_OF_MITOCHONDRION_LOCALIZATION	-0.233176	-0.0486865	-10.9749	2.46905e-25	1.66542e-24	46.6189
GOBP_POSITIVE_REGULATION_OF_UBIQUITIN_PROTEIN_LIGASE_ACTIVITY	-0.286813	-0.0373313	-10.973	2.51195e-25	1.69217e-24	46.6018
GOBP_CHAPERONE_MEDIATED_PROTEIN_FOLDING	-0.23	-0.0399249	-10.9657	2.68101e-25	1.80374e-24	46.5374
GOBP_TRICARBOXYLIC_ACID_METABOLIC_PROCESS	-0.273272	-0.0318105	-10.9643	2.71598e-25	1.82493e-24	46.5246
GOBP_APPENDAGE_DEVELOPMENT	-0.140299	-0.0172085	-10.9612	2.79068e-25	1.87272e-24	46.4977
GOBP_LATERAL_VENTRICLE_DEVELOPMENT	-0.243468	-0.031849	-10.9557	2.93316e-25	1.96582e-24	46.4484
GOBP_POSITIVE_REGULATION_OF_CYTOKINESIS	-0.207734	-0.0191363	-10.9368	3.47469e-25	2.32578e-24	46.2808
GOBP_MRNA_PROCESSING	-0.278084	-0.0280069	-10.9356	3.5114e-25	2.34735e-24	46.2704
GOBP_CLATHRIN_DEPENDENT_ENDOCYTOSIS	-0.24902	-0.0330895	-10.931	3.65875e-25	2.44274e-24	46.2298
GOBP_REGULATION_OF_DNA_DAMAGE_RESPONSE_SIGNAL_TRANSDUCTION_BY_P53_CLASS_MEDIATOR	-0.21265	-0.0461477	-10.9279	3.76084e-25	2.50771e-24	46.2025
GOBP_TRNA_WOBBLE_URIDINE_MODIFICATION	-0.307695	-0.0490672	-10.9261	3.8224e-25	2.54552e-24	46.1865
GOBP_TRANSPORT_OF_VIRUS	-0.205594	-0.0297042	-10.9228	3.93665e-25	2.61827e-24	46.1573
GOBP_REGULATION_OF_TOLL_LIKE_RECEPTOR_3_SIGNALING_PATHWAY	-0.327026	-0.0451297	-10.9185	4.09192e-25	2.71809e-24	46.1191
GOBP_TOXIN_TRANSPORT	-0.219743	-0.0339671	-10.9176	4.12472e-25	2.73641e-24	46.1112
GOBP_UBIQUINONE_METABOLIC_PROCESS	-0.278381	-0.0487691	-10.904	4.65728e-25	3.08582e-24	45.991
GOBP_PALLIUM_DEVELOPMENT	-0.185998	-0.0291671	-10.9027	4.71057e-25	3.11718e-24	45.9798
GOBP_RAS_PROTEIN_SIGNAL_TRANSDUCTION	-0.163356	-0.0385919	-10.9001	4.82189e-25	3.18683e-24	45.9567
GOBP_LYTIC_VACUOLE_ORGANIZATION	-0.238546	-0.0383909	-10.8994	4.85334e-25	3.20357e-24	45.9502
GOBP_REGULATION_OF_RAS_PROTEIN_SIGNAL_TRANSDUCTION	-0.164753	-0.0377713	-10.8959	5.00727e-25	3.30102e-24	45.9194
GOBP_CELL_GROWTH	-0.130668	-0.0338158	-10.8917	5.19743e-25	3.42207e-24	45.8825
GOBP_NEGATIVE_REGULATION_OF_HIPPO_SIGNALING	-0.269249	-0.0523369	-10.8916	5.20412e-25	3.42218e-24	45.8812
GOBP_REGULATION_OF_RNA_BINDING	-0.316858	-0.0387683	-10.8827	5.63274e-25	3.6994e-24	45.8029
GOBP_PROTEIN_LOCALIZATION_TO_ENDOSOME	-0.260483	-0.0404175	-10.8747	6.0535e-25	3.97076e-24	45.7316
GOBP_POSITIVE_REGULATION_OF_RRNA_PROCESSING	-0.414698	-0.0349898	-10.8706	6.27536e-25	4.11114e-24	45.696
GOBP_ESTABLISHMENT_OF_PROTEIN_LOCALIZATION_TO_MITOCHONDRIAL_MEMBRANE	-0.278714	-0.0503159	-10.8699	6.31618e-25	4.13272e-24	45.6896
GOBP_REGULATION_OF_PROTEIN_COMPLEX_STABILITY	-0.278515	-0.0544423	-10.8659	6.54351e-25	4.27612e-24	45.6546
GOBP_REGULATION_OF_RAC_PROTEIN_SIGNAL_TRANSDUCTION	-0.270229	-0.0376654	-10.8634	6.69197e-25	4.3677e-24	45.6325
GOBP_REGULATION_OF_DNA_METHYLATION_DEPENDENT_HETEROCHROMATIN_ASSEMBLY	-0.308002	-0.0351338	-10.8591	6.95411e-25	4.53314e-24	45.5944
GOBP_ENTEROENDOCRINE_CELL_DIFFERENTIATION	-0.191421	-0.0147346	-10.8541	7.27097e-25	4.7338e-24	45.5504
GOBP_REGULATION_OF_RNA_SPLICING	-0.261411	-0.0297318	-10.8501	7.53541e-25	4.89988e-24	45.515
GOBP_CELLULAR_CARBOHYDRATE_METABOLIC_PROCESS	-0.121752	-0.0354207	-10.8479	7.68639e-25	4.99186e-24	45.4954
GOBP_ER_ASSOCIATED_MISFOLDED_PROTEIN_CATABOLIC_PROCESS	-0.385685	-0.0406348	-10.8436	7.9856e-25	5.17977e-24	45.4576
GOBP_NEURAL_TUBE_FORMATION	-0.200381	-0.0393302	-10.8402	8.22677e-25	5.3296e-24	45.4282
GOBP_NEGATIVE_REGULATION_OF_INTRINSIC_APOPTOTIC_SIGNALING_PATHWAY_BY_P53_CLASS_MEDIATOR	-0.225524	-0.0397371	-10.83	9.01313e-25	5.83183e-24	45.3379
GOBP_NEGATIVE_REGULATION_OF_DNA_DEPENDENT_DNA_REPLICATION	-0.322279	-0.0373952	-10.8283	9.1496e-25	5.91283e-24	45.323
GOBP_MITOTIC_CHROMOSOME_CONDENSATION	-0.355552	-0.0563246	-10.8281	9.16939e-25	5.91832e-24	45.3209
GOBP_NEGATIVE_REGULATION_OF_KINASE_ACTIVITY	-0.141399	-0.0424311	-10.8272	9.23912e-25	5.95599e-24	45.3134
GOBP_NEGATIVE_REGULATION_OF_METAPHASE_ANAPHASE_TRANSITION_OF_CELL_CYCLE	-0.307925	-0.0473197	-10.8248	9.43889e-25	6.0773e-24	45.2922
GOBP_REGULATION_OF_DNA_TEMPLATED_TRANSCRIPTION_ELONGATION	-0.312015	-0.0267907	-10.8214	9.73194e-25	6.2583e-24	45.262
GOBP_EMBRYONIC_DIGIT_MORPHOGENESIS	-0.193461	-0.0272173	-10.8068	1.10808e-24	7.11698e-24	45.1336
GOBP_NEGATIVE_REGULATION_OF_PROTEIN_POLYUBIQUITINATION	-0.251986	-0.042084	-10.7997	1.1795e-24	7.56642e-24	45.0718
GOBP_REGULATION_OF_GTP_BINDING	-0.237272	-0.0402433	-10.7843	1.35295e-24	8.66847e-24	44.9361
GOBP_ANTIMICROBIAL_HUMORAL_RESPONSE	0.193068	0.0223735	10.7772	1.44118e-24	9.22252e-24	44.8736
GOBP_REGULATION_OF_ANDROGEN_RECEPTOR_SIGNALING_PATHWAY	-0.211471	-0.0401504	-10.7705	1.52851e-24	9.76939e-24	44.8154
GOBP_POSITIVE_REGULATION_OF_HISTONE_MODIFICATION	-0.221617	-0.0267127	-10.769	1.54937e-24	9.89066e-24	44.802
GOBP_REGULATION_OF_GENE_EXPRESSION_EPIGENETIC	-0.248802	-0.0277754	-10.7683	1.5591e-24	9.94067e-24	44.7958
GOBP_POSITIVE_REGULATION_OF_NEURON_PROJECTION_DEVELOPMENT	-0.178509	-0.0356716	-10.768	1.56314e-24	9.9543e-24	44.7933
GOBP_SMALL_NUCLEOLAR_RIBONUCLEOPROTEIN_COMPLEX_ASSEMBLY	-0.30862	-0.0568331	-10.7663	1.58693e-24	1.00936e-23	44.7783
GOBP_PURINE_NUCLEOBASE_BIOSYNTHETIC_PROCESS	-0.292123	-0.0449406	-10.7515	1.81017e-24	1.14995e-23	44.6482
GOBP_NEGATIVE_REGULATION_OF_TRANSFERASE_ACTIVITY	-0.143054	-0.0423526	-10.7463	1.89474e-24	1.20222e-23	44.603
GOBP_APPENDAGE_MORPHOGENESIS	-0.145779	-0.0163445	-10.7311	2.16819e-24	1.37406e-23	44.4697
GOBP_ASTRAL_MICROTUBULE_ORGANIZATION	-0.294016	-0.0359934	-10.726	2.26889e-24	1.43614e-23	44.4247
GOBP_PRENYLATION	-0.255358	-0.0441087	-10.7239	2.31064e-24	1.46081e-23	44.4067
GOBP_INTRINSIC_APOPTOTIC_SIGNALING_PATHWAY_IN_RESPONSE_TO_OXIDATIVE_STRESS	-0.204385	-0.041019	-10.7212	2.36738e-24	1.49487e-23	44.3827
GOBP_NEGATIVE_REGULATION_OF_TYROSINE_PHOSPHORYLATION_OF_STAT_PROTEIN	-0.263574	-0.0477688	-10.7195	2.40297e-24	1.51552e-23	44.368
GOBP_POSITIVE_REGULATION_OF_PROTEIN_SERINE_THREONINE_KINASE_ACTIVITY	-0.129184	-0.0371939	-10.7162	2.47244e-24	1.55746e-23	44.3398
GOBP_HISTONE_H4_K16_ACETYLATION	-0.323783	-0.0318543	-10.7143	2.51622e-24	1.58313e-23	44.3224
GOBP_PEPTIDYL_HISTIDINE_MODIFICATION	-0.295978	-0.0457127	-10.7126	2.55426e-24	1.60514e-23	44.3076
GOBP_REGULATION_OF_DNA_STRAND_ELONGATION	-0.327832	-0.0413976	-10.7124	2.55781e-24	1.60544e-23	44.3062
GOBP_CALCIUM_IMPORT_INTO_THE_MITOCHONDRION	-0.320975	-0.0348228	-10.707	2.68264e-24	1.68179e-23	44.2591
GOBP_REGULATION_OF_PROTEIN_AUTOPHOSPHORYLATION	-0.208445	-0.0468984	-10.7042	2.74997e-24	1.72193e-23	44.2346
GOBP_CYTOKINETIC_PROCESS	-0.239048	-0.0478491	-10.704	2.75596e-24	1.72363e-23	44.2324
GOBP_REGULATION_OF_ESTABLISHMENT_OF_PROTEIN_LOCALIZATION_TO_MITOCHONDRION	-0.200364	-0.0420571	-10.7036	2.76428e-24	1.72677e-23	44.2294
GOBP_UBIQUITIN_RECYCLING	-0.277431	-0.0435238	-10.6999	2.85795e-24	1.78316e-23	44.1965
GOBP_CELLULAR_RESPONSE_TO_INSULIN_STIMULUS	-0.151668	-0.0303689	-10.6948	2.98928e-24	1.86288e-23	44.152
GOBP_NEGATIVE_REGULATION_OF_PROTEIN_DEPHOSPHORYLATION	-0.235871	-0.0470916	-10.6878	3.1799e-24	1.97932e-23	44.0909
GOBP_POSITIVE_REGULATION_OF_FILOPODIUM_ASSEMBLY	-0.198601	-0.0455122	-10.6835	3.30278e-24	2.05336e-23	44.0534
GOBP_VIRAL_GENOME_REPLICATION	-0.218272	-0.0336122	-10.6831	3.31322e-24	2.05741e-23	44.0503
GOBP_REGULATION_OF_PROTEIN_IMPORT	-0.200563	-0.0382949	-10.6829	3.3186e-24	2.05832e-23	44.0487
GOBP_COPPER_ION_HOMEOSTASIS	-0.208987	-0.0464292	-10.6823	3.33817e-24	2.06801e-23	44.0429
GOBP_NEGATIVE_REGULATION_OF_ORGANELLE_ASSEMBLY	-0.224834	-0.0338194	-10.6678	3.79388e-24	2.34755e-23	43.9163
GOBP_POSITIVE_REGULATION_OF_LAMELLIPODIUM_ASSEMBLY	-0.290135	-0.0314444	-10.6661	3.85024e-24	2.37961e-23	43.9017
GOBP_REGULATION_OF_HISTONE_H3_K9_METHYLATION	-0.261839	-0.0300403	-10.6653	3.87648e-24	2.39301e-23	43.895
GOBP_MAINTENANCE_OF_PROTEIN_LOCATION_IN_NUCLEUS	-0.219406	-0.0530877	-10.6584	4.12003e-24	2.54036e-23	43.8347
GOBP_DOSAGE_COMPENSATION	-0.32999	-0.028966	-10.6582	4.12819e-24	2.5424e-23	43.8328
GOBP_POSITIVE_REGULATION_OF_TELOMERASE_RNA_LOCALIZATION_TO_CAJAL_BODY	-0.393781	-0.0394092	-10.6567	4.18092e-24	2.57185e-23	43.8202
GOBP_GLUCOSE_METABOLIC_PROCESS	-0.117956	-0.0319658	-10.6551	4.24021e-24	2.60527e-23	43.8063
GOBP_REGULATION_OF_CYCLIN_DEPENDENT_PROTEIN_KINASE_ACTIVITY	-0.176776	-0.0424053	-10.6523	4.34629e-24	2.66732e-23	43.7819
GOBP_REGULATION_OF_PROTEIN_EXPORT_FROM_NUCLEUS	-0.192185	-0.0479687	-10.6474	4.53773e-24	2.78155e-23	43.7392
GOBP_POSITIVE_REGULATION_OF_FOCAL_ADHESION_ASSEMBLY	-0.211137	-0.0380817	-10.6131	6.13719e-24	3.75759e-23	43.4407
GOBP_REGULATION_OF_GLUCONEOGENESIS	-0.148947	-0.0332053	-10.611	6.25523e-24	3.8254e-23	43.4218
GOBP_REGULATION_OF_MITOTIC_NUCLEAR_DIVISION	-0.236828	-0.0447683	-10.6081	6.41354e-24	3.91764e-23	43.3971
GOBP_ERYTHROCYTE_HOMEOSTASIS	-0.184683	-0.0328863	-10.6016	6.78996e-24	4.14275e-23	43.3407
GOBP_PROTEIN_LOCALIZATION_TO_MICROTUBULE	-0.225563	-0.0386545	-10.6008	6.83741e-24	4.16684e-23	43.3338
GOBP_MITOTIC_CYTOKINETIC_PROCESS	-0.285309	-0.0494541	-10.5925	7.35431e-24	4.47665e-23	43.2618
GOBP_MAINTENANCE_OF_PROTEIN_LOCATION	-0.175191	-0.0431718	-10.5735	8.69425e-24	5.28615e-23	43.0962
GOBP_NEGATIVE_REGULATION_OF_NUCLEAR_TRANSCRIBED_MRNA_CATABOLIC_PROCESS_DEADENYLATION_DEPENDENT_DECAY	-0.361396	-0.0342376	-10.5698	8.97991e-24	5.4535e-23	43.0643
GOBP_NEGATIVE_REGULATION_OF_PHOSPHOPROTEIN_PHOSPHATASE_ACTIVITY	-0.201628	-0.0471348	-10.5598	9.79711e-24	5.9429e-23	42.9782
GOBP_REGULATION_OF_PEPTIDYL_LYSINE_ACETYLATION	-0.173206	-0.0340099	-10.556	1.01334e-23	6.1398e-23	42.9448
GOBP_CELLULAR_COPPER_ION_HOMEOSTASIS	-0.206722	-0.0480414	-10.551	1.05879e-23	6.40773e-23	42.9014
GOBP_REGULATION_OF_MRNA_POLYADENYLATION	-0.322747	-0.0321303	-10.5479	1.08758e-23	6.57441e-23	42.8749
GOBP_PROTEIN_INSERTION_INTO_ER_MEMBRANE	-0.297547	-0.0460111	-10.5438	1.12738e-23	6.80714e-23	42.8393
GOBP_NUCLEOSOME_MOBILIZATION	-0.330406	-0.0374226	-10.5372	1.19444e-23	7.20373e-23	42.7822
GOBP_RESPONSE_TO_INSULIN	-0.142836	-0.0298368	-10.5292	1.28147e-23	7.71977e-23	42.7127
GOBP_OLEFINIC_COMPOUND_METABOLIC_PROCESS	0.147624	-0.0157784	10.5252	1.32636e-23	7.98101e-23	42.6786
GOBP_MYELOID_CELL_HOMEOSTASIS	-0.17955	-0.0339413	-10.5223	1.36023e-23	8.17544e-23	42.6537
GOBP_NEGATIVE_REGULATION_OF_PROTEIN_TYROSINE_KINASE_ACTIVITY	-0.20637	-0.0472123	-10.5158	1.43966e-23	8.64293e-23	42.5976
GOBP_HISTONE_DEACETYLATION	-0.222136	-0.0379305	-10.5136	1.46803e-23	8.80317e-23	42.5783
GOBP_INTRINSIC_APOPTOTIC_SIGNALING_PATHWAY	-0.165789	-0.0399593	-10.4948	1.73086e-23	1.03673e-22	42.4154
GOBP_REGULATION_OF_PHOSPHATASE_ACTIVITY	-0.166856	-0.0357595	-10.4937	1.74736e-23	1.04543e-22	42.4061
GOBP_ICOSANOID_METABOLIC_PROCESS	0.146627	-0.0206717	10.4933	1.7533e-23	1.04778e-22	42.4027
GOBP_PIGMENT_GRANULE_MATURATION	-0.338157	-0.0624405	-10.4918	1.77558e-23	1.05989e-22	42.3902
GOBP_CEREBRAL_CORTEX_RADIALLY_ORIENTED_CELL_MIGRATION	-0.263179	-0.0457161	-10.4814	1.94545e-23	1.15997e-22	42.2999
GOBP_BODY_MORPHOGENESIS	-0.166888	-0.0239836	-10.48	1.96866e-23	1.17247e-22	42.2882
GOBP_SEMINIFEROUS_TUBULE_DEVELOPMENT	-0.255589	-0.0419588	-10.4692	2.1628e-23	1.28664e-22	42.1952
GOBP_EMBRYONIC_BODY_MORPHOGENESIS	-0.264458	-0.0288273	-10.4663	2.21869e-23	1.31838e-22	42.17
GOBP_CELLULAR_RESPONSE_TO_ANTIBIOTIC	-0.235552	-0.0365817	-10.4615	2.31217e-23	1.37237e-22	42.1292
GOBP_NEGATIVE_REGULATION_OF_DEFENSE_RESPONSE_TO_VIRUS	-0.250017	-0.0492388	-10.4542	2.46381e-23	1.46073e-22	42.0663
GOBP_HISTONE_H3_K9_MODIFICATION	-0.2399	-0.0267912	-10.4524	2.50269e-23	1.48091e-22	42.0509
GOBP_ALTERNATIVE_MRNA_SPLICING_VIA_SPLICEOSOME	-0.261904	-0.0258582	-10.4524	2.5035e-23	1.48091e-22	42.0506
GOBP_VENTRICULAR_SYSTEM_DEVELOPMENT	-0.224637	-0.0349925	-10.4516	2.52125e-23	1.48973e-22	42.0436
GOBP_POSITIVE_REGULATION_OF_HISTONE_H3_K9_METHYLATION	-0.263993	-0.0276798	-10.4474	2.61539e-23	1.54361e-22	42.0073
GOBP_MIRNA_CATABOLIC_PROCESS	-0.28862	-0.027255	-10.4406	2.77565e-23	1.63636e-22	41.9485
GOBP_DNA_STRAND_ELONGATION_INVOLVED_IN_DNA_REPLICATION	-0.397944	-0.049643	-10.433	2.96416e-23	1.74552e-22	41.8836
GOBP_CEREBRAL_CORTEX_CELL_MIGRATION	-0.246561	-0.0416362	-10.4289	3.07201e-23	1.80701e-22	41.8482
GOBP_RAB_PROTEIN_SIGNAL_TRANSDUCTION	-0.246222	-0.0383468	-10.4258	3.15669e-23	1.85473e-22	41.8214
GOBP_CELLULAR_RESPONSE_TO_CHEMICAL_STRESS	-0.150433	-0.0339603	-10.4246	3.18922e-23	1.87175e-22	41.8112
GOBP_REGULATION_OF_CARBOHYDRATE_METABOLIC_PROCESS	-0.111858	-0.0330865	-10.424	3.20557e-23	1.87924e-22	41.8062
GOBP_CELLULAR_RESPONSE_TO_OXYGEN_LEVELS	-0.136002	-0.037385	-10.4214	3.27828e-23	1.91872e-22	41.784
GOBP_PROTEOGLYCAN_BIOSYNTHETIC_PROCESS	-0.210306	-0.0428569	-10.4213	3.28023e-23	1.91872e-22	41.7834
GOBP_ESTABLISHMENT_OF_ENDOTHELIAL_INTESTINAL_BARRIER	-0.245254	-0.0343192	-10.4173	3.3985e-23	1.98568e-22	41.7484
GOBP_AGING	-0.126032	-0.0332486	-10.4046	3.79344e-23	2.21396e-22	41.6397
GOBP_POSITIVE_REGULATION_OF_MRNA_SPLICING_VIA_SPLICEOSOME	-0.252134	-0.0418217	-10.3975	4.03549e-23	2.35261e-22	41.5786
GOBP_DNA_LIGATION	-0.271861	-0.0521818	-10.3969	4.05498e-23	2.36135e-22	41.5738
GOBP_INTESTINAL_EPITHELIAL_CELL_DEVELOPMENT	-0.243346	-0.0282612	-10.3817	4.62863e-23	2.69242e-22	41.443
GOBP_POSITIVE_REGULATION_OF_DOUBLE_STRAND_BREAK_REPAIR_VIA_NONHOMOLOGOUS_END_JOINING	-0.3054	-0.0343374	-10.3705	5.09739e-23	2.9618e-22	41.3476
GOBP_NUCLEOSIDE_BISPHOSPHATE_BIOSYNTHETIC_PROCESS	-0.195044	-0.0438847	-10.3697	5.13444e-23	2.98002e-22	41.3405
GOBP_FOLIC_ACID_CONTAINING_COMPOUND_BIOSYNTHETIC_PROCESS	-0.335834	-0.0480914	-10.3606	5.55523e-23	3.22068e-22	41.2626
GOBP_PROTEIN_TRANSMEMBRANE_IMPORT_INTO_INTRACELLULAR_ORGANELLE	-0.248678	-0.0438799	-10.3551	5.82438e-23	3.37299e-22	41.2158
GOBP_NEGATIVE_REGULATION_OF_TRANSLATIONAL_INITIATION	-0.272877	-0.0393063	-10.3525	5.95729e-23	3.44616e-22	41.1935
GOBP_PROTECTION_FROM_NON_HOMOLOGOUS_END_JOINING_AT_TELOMERE	-0.325302	-0.0507445	-10.3323	7.09578e-23	4.10022e-22	41.0207
GOBP_HOMEOSTASIS_OF_NUMBER_OF_CELLS	-0.168022	-0.0331063	-10.3319	7.1221e-23	4.11089e-22	41.017
GOBP_RESPONSE_TO_NITRIC_OXIDE	-0.206604	-0.037767	-10.3284	7.33992e-23	4.23196e-22	40.9872
GOBP_NCRNA_3_END_PROCESSING	-0.268756	-0.0325632	-10.3094	8.6504e-23	4.98206e-22	40.8248
GOBP_REGULATION_OF_DIGESTIVE_SYSTEM_PROCESS	0.151105	-0.00888465	10.3088	8.69109e-23	5e-22	40.8202
GOBP_GLYCEROPHOSPHOLIPID_METABOLIC_PROCESS	-0.141226	-0.037497	-10.2998	9.3978e-23	5.40064e-22	40.7429
GOBP_REGULATION_OF_ALTERNATIVE_MRNA_SPLICING_VIA_SPLICEOSOME	-0.250721	-0.025801	-10.2992	9.44369e-23	5.42107e-22	40.7381
GOBP_REPLICATION_FORK_PROCESSING	-0.272222	-0.0419033	-10.2978	9.55643e-23	5.47979e-22	40.7264
GOBP_PROTEIN_INSERTION_INTO_MEMBRANE	-0.234651	-0.0419529	-10.2952	9.77651e-23	5.59986e-22	40.7039
GOBP_LATE_ENDOSOME_TO_VACUOLE_TRANSPORT_VIA_MULTIVESICULAR_BODY_SORTING_PATHWAY	-0.259428	-0.0483298	-10.2659	1.25856e-22	7.20099e-22	40.4543
GOBP_NEGATIVE_REGULATION_OF_DEPHOSPHORYLATION	-0.197475	-0.0441284	-10.2643	1.27498e-22	7.28697e-22	40.4414
GOBP_MEMBRANE_PROTEIN_INTRACELLULAR_DOMAIN_PROTEOLYSIS	-0.304758	-0.0404357	-10.263	1.29004e-22	7.36504e-22	40.4298
GOBP_REGULATION_OF_WNT_SIGNALING_PATHWAY	-0.131373	-0.0293982	-10.2609	1.31369e-22	7.49188e-22	40.4119
GOBP_PROTEIN_LOCALIZATION_TO_NUCLEAR_BODY	-0.396887	-0.0265033	-10.2537	1.39688e-22	7.95767e-22	40.3512
GOBP_PROTEIN_LOCALIZATION_TO_NUCLEOLUS	-0.328989	-0.0366044	-10.2523	1.41469e-22	8.05038e-22	40.3387
GOBP_POSITIVE_REGULATION_OF_PROTEIN_LOCALIZATION_TO_NUCLEUS	-0.230718	-0.0324463	-10.2492	1.45181e-22	8.25265e-22	40.3131
GOBP_DNA_DEPENDENT_DNA_REPLICATION_MAINTENANCE_OF_FIDELITY	-0.281806	-0.0406496	-10.2484	1.46269e-22	8.30546e-22	40.3057
GOBP_PROTEIN_DEMETHYLATION	-0.27356	-0.04417	-10.2478	1.47014e-22	8.33872e-22	40.3007
GOBP_ESTABLISHMENT_OF_CELL_POLARITY	-0.166227	-0.0339591	-10.2451	1.50389e-22	8.52096e-22	40.2782
GOBP_REGULATION_OF_TRANSCRIPTION_BY_RNA_POLYMERASE_I	-0.304431	-0.0338853	-10.2445	1.51255e-22	8.56078e-22	40.2726
GOBP_RESPONSE_TO_GAMMA_RADIATION	-0.247134	-0.0432232	-10.2293	1.72341e-22	9.7437e-22	40.1436
GOBP_PROTEIN_FOLDING_IN_ENDOPLASMIC_RETICULUM	-0.342976	-0.0428932	-10.2212	1.84736e-22	1.04332e-21	40.0749
GOBP_DNA_REPLICATION_CHECKPOINT_SIGNALING	-0.341553	-0.0559083	-10.218	1.89817e-22	1.07086e-21	40.0481
GOBP_PEROXISOME_ORGANIZATION	-0.225726	-0.0408252	-10.2179	1.90061e-22	1.07108e-21	40.0469
GOBP_REGULATION_OF_PROTEIN_LOCALIZATION_TO_CILIUM	-0.290267	-0.0528878	-10.2115	2.00805e-22	1.13042e-21	39.9925
GOBP_POSITIVE_REGULATION_OF_PROTEIN_EXPORT_FROM_NUCLEUS	-0.209203	-0.0407988	-10.1999	2.21743e-22	1.24695e-21	39.8945
GOBP_DNA_MODIFICATION	-0.161787	-0.0348056	-10.1973	2.26841e-22	1.27425e-21	39.872
GOBP_MAINTENANCE_OF_PROTEIN_LOCATION_IN_CELL	-0.186576	-0.0491906	-10.1767	2.70544e-22	1.51812e-21	39.6979
GOBP_POSTTRANSLATIONAL_PROTEIN_TARGETING_TO_ENDOPLASMIC_RETICULUM_MEMBRANE	-0.283486	-0.042641	-10.176	2.72181e-22	1.52567e-21	39.692
GOBP_PROTEIN_ADP_RIBOSYLATION	-0.204131	-0.041766	-10.1728	2.79727e-22	1.56629e-21	39.6649
GOBP_ORGANELLE_INHERITANCE	-0.251773	-0.0458557	-10.1658	2.96859e-22	1.66044e-21	39.6062
GOBP_REGULATION_OF_CELLULAR_CARBOHYDRATE_METABOLIC_PROCESS	-0.104781	-0.0319245	-10.1635	3.0279e-22	1.6903e-21	39.5866
GOBP_HORMONE_MEDIATED_SIGNALING_PATHWAY	-0.13427	-0.0267064	-10.1635	3.02842e-22	1.6903e-21	39.5865
GOBP_POSITIVE_REGULATION_OF_DNA_DEPENDENT_DNA_REPLICATION	-0.322899	-0.0516291	-10.1618	3.07325e-22	1.7135e-21	39.572
GOBP_ERBB_SIGNALING_PATHWAY	-0.150797	-0.0361771	-10.1576	3.18455e-22	1.77367e-21	39.5368
GOBP_TRANSLATIONAL_ELONGATION	-0.218679	-0.0397964	-10.1571	3.19719e-22	1.77882e-21	39.5329
GOBP_FIBROBLAST_MIGRATION	-0.193162	-0.041096	-10.1547	3.26442e-22	1.8143e-21	39.5123
GOBP_MITOCHONDRIAL_TRNA_PROCESSING	-0.335401	-0.037496	-10.1295	4.0489e-22	2.24791e-21	39.2995
GOBP_NEGATIVE_REGULATION_OF_PHOSPHORUS_METABOLIC_PROCESS	-0.127241	-0.0387427	-10.1262	4.16437e-22	2.30957e-21	39.2717
GOBP_RESPONSE_TO_ACID_CHEMICAL	-0.129392	-0.0268577	-10.1242	4.23477e-22	2.34613e-21	39.2552
GOBP_REGULATION_OF_PROTEIN_DEACETYLATION	-0.184201	-0.0361884	-10.1142	4.61444e-22	2.55378e-21	39.1703
GOBP_RRNA_TRANSCRIPTION	-0.304044	-0.0374344	-10.0989	5.25486e-22	2.90514e-21	39.0419
GOBP_POSITIVE_REGULATION_OF_WNT_SIGNALING_PATHWAY	-0.16166	-0.0253808	-10.0938	5.49017e-22	3.03203e-21	38.9986
GOBP_POSITIVE_REGULATION_BY_HOST_OF_VIRAL_TRANSCRIPTION	-0.306255	-0.0339686	-10.0902	5.65987e-22	3.12246e-21	38.9685
GOBP_RRNA_METHYLATION	-0.303174	-0.046262	-10.085	5.91377e-22	3.2591e-21	38.9252
GOBP_MITOCHONDRIAL_CALCIUM_ION_HOMEOSTASIS	-0.228282	-0.0365746	-10.0801	6.165e-22	3.39399e-21	38.8841
GOBP_N_GLYCAN_PROCESSING	-0.235747	-0.0494524	-10.0761	6.38205e-22	3.50979e-21	38.8499
GOBP_SUPPRESSION_OF_VIRAL_RELEASE_BY_HOST	-0.268019	-0.0432236	-10.0736	6.51605e-22	3.57973e-21	38.8294
GOBP_ESTABLISHMENT_OR_MAINTENANCE_OF_CELL_POLARITY	-0.151646	-0.0377679	-10.0692	6.76491e-22	3.71256e-21	38.7923
GOBP_REGULATION_OF_ERYTHROCYTE_DIFFERENTIATION	-0.202248	-0.0320233	-10.0681	6.83005e-22	3.74438e-21	38.7829
GOBP_REGULATION_OF_CELLULAR_RESPONSE_TO_TRANSFORMING_GROWTH_FACTOR_BETA_STIMULUS	-0.143687	-0.0301599	-10.067	6.8927e-22	3.77478e-21	38.7738
GOBP_MEIOTIC_CELL_CYCLE	-0.149062	-0.0369969	-10.0559	7.57566e-22	4.14447e-21	38.6805
GOBP_NEGATIVE_REGULATION_OF_CALCINEURIN_MEDIATED_SIGNALING	-0.184478	-0.0436692	-10.0499	7.9722e-22	4.35686e-21	38.6301
GOBP_NEGATIVE_REGULATION_OF_PROTEIN_CONTAINING_COMPLEX_DISASSEMBLY	-0.180415	-0.0352833	-10.0487	8.05293e-22	4.3964e-21	38.6201
GOBP_WATER_SOLUBLE_VITAMIN_METABOLIC_PROCESS	-0.151571	-0.0375614	-10.0465	8.20718e-22	4.47594e-21	38.6014
GOBP_KERATINIZATION	0.179175	0.0362249	10.0415	8.56003e-22	4.66352e-21	38.5598
GOBP_PHOSPHATE_ION_TRANSMEMBRANE_TRANSPORT	-0.225132	-0.0447441	-10.0375	8.85588e-22	4.8197e-21	38.5262
GOBP_AMP_BIOSYNTHETIC_PROCESS	-0.246763	-0.0498386	-10.0372	8.87465e-22	4.8249e-21	38.5241
GOBP_HISTONE_H3_K9_TRIMETHYLATION	-0.279161	-0.0348586	-10.0351	9.03738e-22	4.90828e-21	38.5062
GOBP_POSITIVE_REGULATION_OF_GROWTH	-0.119851	-0.0257186	-10.0339	9.13337e-22	4.95528e-21	38.4957
GOBP_DNA_PACKAGING	-0.199293	-0.0287714	-10.0307	9.37894e-22	5.08325e-21	38.4695
GOBP_DNA_METHYLATION_OR_DEMETHYLATION	-0.165453	-0.0332192	-10.0275	9.64074e-22	5.21974e-21	38.4423
GOBP_REGULATION_OF_NON_MOTILE_CILIUM_ASSEMBLY	-0.257282	-0.0474349	-10.0262	9.7451e-22	5.2708e-21	38.4317
GOBP_NUCLEOBASE_METABOLIC_PROCESS	-0.184635	-0.0327973	-10.0234	9.98044e-22	5.39252e-21	38.4081
GOBP_PROTEIN_LOCALIZATION_TO_CONDENSED_CHROMOSOME	-0.366515	-0.0554437	-10.019	1.03572e-21	5.59031e-21	38.3715
GOBP_CELLULAR_RESPONSE_TO_MANGANESE_ION	-0.236047	-0.037607	-9.99853	1.23184e-21	6.64203e-21	38.2002
GOBP_POSITIVE_REGULATION_OF_CANONICAL_WNT_SIGNALING_PATHWAY	-0.160542	-0.025089	-9.99348	1.28566e-21	6.92513e-21	38.1579
GOBP_TELENCEPHALON_DEVELOPMENT	-0.156698	-0.0269986	-9.9926	1.29525e-21	6.96959e-21	38.1506
GOBP_POSITIVE_REGULATION_OF_DENDRITIC_SPINE_MORPHOGENESIS	-0.303296	-0.0504824	-9.98991	1.32498e-21	7.12228e-21	38.1282
GOBP_MAINTENANCE_OF_PROTEIN_LOCALIZATION_IN_ORGANELLE	-0.201857	-0.0494061	-9.98944	1.33034e-21	7.14376e-21	38.1242
GOBP_PROTEIN_LOCALIZATION_TO_CILIARY_MEMBRANE	-0.274246	-0.0365104	-9.98921	1.33292e-21	7.15031e-21	38.1223
GOBP_NEGATIVE_REGULATION_OF_PROTEASOMAL_PROTEIN_CATABOLIC_PROCESS	-0.210156	-0.030282	-9.96923	1.57806e-21	8.45666e-21	37.9555
GOBP_POLYOL_CATABOLIC_PROCESS	-0.218073	-0.033694	-9.96531	1.63113e-21	8.73211e-21	37.9228
GOBP_PROTEIN_LOCALIZATION_TO_NUCLEOPLASM	-0.355868	-0.0250648	-9.95852	1.72724e-21	9.2372e-21	37.8663
GOBP_MODULATION_BY_HOST_OF_VIRAL_PROCESS	-0.18918	-0.0233268	-9.95447	1.78732e-21	9.54878e-21	37.8325
GOBP_SKELETAL_MUSCLE_CONTRACTION	0.161201	-0.0273175	9.95097	1.84082e-21	9.8246e-21	37.8034
GOBP_ESTABLISHMENT_OF_TISSUE_POLARITY	-0.161219	-0.0321676	-9.95073	1.84464e-21	9.83496e-21	37.8013
GOBP_POSITIVE_REGULATION_OF_ESTABLISHMENT_OF_PROTEIN_LOCALIZATION_TO_TELOMERE	-0.40663	-0.0278082	-9.94944	1.86471e-21	9.93187e-21	37.7906
GOBP_INTRACELLULAR_LIPID_TRANSPORT	-0.170235	-0.0404249	-9.9472	1.90035e-21	1.01103e-20	37.7719
GOBP_NON_LYTIC_VIRAL_RELEASE	-0.287471	-0.0399233	-9.94709	1.90208e-21	1.01103e-20	37.771
GOBP_RAC_PROTEIN_SIGNAL_TRANSDUCTION	-0.237232	-0.0390771	-9.94556	1.92676e-21	1.02311e-20	37.7583
GOBP_POSITIVE_REGULATION_OF_PHOSPHOPROTEIN_PHOSPHATASE_ACTIVITY	-0.234092	-0.0318082	-9.94408	1.95106e-21	1.03467e-20	37.7459
GOBP_CELLULAR_AMINO_ACID_METABOLIC_PROCESS	-0.121245	-0.0331109	-9.94399	1.95246e-21	1.03467e-20	37.7452
GOBP_SPERMATID_NUCLEUS_DIFFERENTIATION	-0.173002	-0.0115041	-9.94065	2.00819e-21	1.06312e-20	37.7174
GOBP_NEGATIVE_REGULATION_OF_CELL_AGING	-0.211168	-0.0311094	-9.93733	2.0651e-21	1.09215e-20	37.6898
GOBP_NCRNA_PROCESSING	-0.282005	-0.0264308	-9.93639	2.08162e-21	1.09977e-20	37.6819
GOBP_GLYCOSYL_COMPOUND_BIOSYNTHETIC_PROCESS	-0.231426	-0.0367183	-9.93325	2.13747e-21	1.12815e-20	37.6558
GOBP_REGULATION_OF_MIRNA_METABOLIC_PROCESS	-0.27822	-0.0264148	-9.92495	2.29223e-21	1.20861e-20	37.5867
GOBP_TRANSFORMING_GROWTH_FACTOR_BETA_RECEPTOR_SIGNALING_PATHWAY	-0.151885	-0.0290601	-9.91848	2.42036e-21	1.27488e-20	37.533
GOBP_NEGATIVE_REGULATION_OF_INTRACELLULAR_TRANSPORT	-0.17018	-0.0367887	-9.91255	2.54421e-21	1.33878e-20	37.4837
GOBP_ACETYL_COA_METABOLIC_PROCESS	-0.206453	-0.0271698	-9.9092	2.61694e-21	1.37566e-20	37.4559
GOBP_POSITIVE_REGULATION_OF_CYTOPLASMIC_TRANSLATION	-0.302833	-0.0312039	-9.90601	2.68809e-21	1.41165e-20	37.4294
GOBP_DNA_METHYLATION_DEPENDENT_HETEROCHROMATIN_ASSEMBLY	-0.276139	-0.0383258	-9.90316	2.75337e-21	1.44448e-20	37.4057
GOBP_ACTIVATION_OF_NF_KAPPAB_INDUCING_KINASE_ACTIVITY	-0.237031	-0.0348464	-9.89558	2.93441e-21	1.53792e-20	37.3428
GOBP_LIPOPROTEIN_METABOLIC_PROCESS	-0.159147	-0.0381437	-9.8928	3.0037e-21	1.57267e-20	37.3197
GOBP_POSITIVE_REGULATION_OF_MITOCHONDRIAL_TRANSLATION	-0.347113	-0.0377355	-9.89104	3.04836e-21	1.59446e-20	37.3051
GOBP_NEGATIVE_REGULATION_OF_CELLULAR_SENESCENCE	-0.223215	-0.0283521	-9.88742	3.14246e-21	1.64204e-20	37.2751
GOBP_FACULTATIVE_HETEROCHROMATIN_ASSEMBLY	-0.280927	-0.0346231	-9.88385	3.23834e-21	1.69045e-20	37.2454
GOBP_VITAMIN_D_RECEPTOR_SIGNALING_PATHWAY	-0.241766	-0.0362344	-9.86502	3.79241e-21	1.97771e-20	37.0894
GOBP_CYTOPLASMIC_PATTERN_RECOGNITION_RECEPTOR_SIGNALING_PATHWAY_IN_RESPONSE_TO_VIRUS	-0.242282	-0.0444411	-9.86195	3.8914e-21	2.02732e-20	37.064
GOBP_REGULATION_OF_CELL_SIZE	-0.143041	-0.037256	-9.85873	3.99796e-21	2.0789e-20	37.0373
GOBP_NEGATIVE_REGULATION_OF_CELL_CYCLE_G1_S_PHASE_TRANSITION	-0.162087	-0.0296937	-9.85871	3.99834e-21	2.0789e-20	37.0372
GOBP_VIRAL_PROCESS	-0.185813	-0.0352617	-9.85409	4.15633e-21	2.1589e-20	36.9989
GOBP_PROTEIN_DNA_COMPLEX_SUBUNIT_ORGANIZATION	-0.201011	-0.0323635	-9.84595	4.44941e-21	2.30885e-20	36.9316
GOBP_TELOMERIC_LOOP_DISASSEMBLY	-0.304783	-0.0477051	-9.84443	4.50648e-21	2.33615e-20	36.919
GOBP_RNA_SPLICING	-0.251957	-0.0278774	-9.83421	4.90929e-21	2.54245e-20	36.8345
GOBP_HISTONE_LYSINE_DEMETHYLATION	-0.27399	-0.0435139	-9.83088	5.04785e-21	2.61163e-20	36.807
GOBP_RESPONSE_TO_MITOCHONDRIAL_DEPOLARISATION	-0.220298	-0.0474001	-9.81869	5.58966e-21	2.8891e-20	36.7063
GOBP_INSULIN_RECEPTOR_SIGNALING_PATHWAY	-0.15138	-0.0262008	-9.81592	5.72024e-21	2.95367e-20	36.6835
GOBP_REGULATION_OF_CANONICAL_WNT_SIGNALING_PATHWAY	-0.127698	-0.0298446	-9.81351	5.83668e-21	3.01083e-20	36.6636
GOBP_GASTRIC_ACID_SECRETION	0.206891	-0.00920755	9.81212	5.90488e-21	3.04302e-20	36.6521
GOBP_CRISTAE_FORMATION	-0.233099	-0.0587817	-9.80039	6.51265e-21	3.35293e-20	36.5554
GOBP_NEURAL_TUBE_DEVELOPMENT	-0.165851	-0.0362015	-9.79473	6.82803e-21	3.51184e-20	36.5087
GOBP_THYMUS_DEVELOPMENT	-0.186554	-0.018868	-9.78631	7.32449e-21	3.7635e-20	36.4394
GOBP_POSITIVE_REGULATION_OF_TOR_SIGNALING	-0.202115	-0.0417935	-9.78556	7.37092e-21	3.78364e-20	36.4331
GOBP_FIBROBLAST_APOPTOTIC_PROCESS	-0.251988	-0.0260139	-9.78335	7.5075e-21	3.84998e-20	36.415
GOBP_ANTIBACTERIAL_HUMORAL_RESPONSE	0.185483	0.0250152	9.78294	7.53361e-21	3.8596e-20	36.4116
GOBP_NEGATIVE_REGULATION_OF_PHOSPHORYLATION	-0.120362	-0.0384662	-9.78119	7.64438e-21	3.91252e-20	36.3971
GOBP_REGULATION_OF_PERK_MEDIATED_UNFOLDED_PROTEIN_RESPONSE	-0.265239	-0.0455048	-9.78077	7.67121e-21	3.92242e-20	36.3937
GOBP_NEGATIVE_REGULATION_OF_GTPASE_ACTIVITY	-0.17587	-0.0398217	-9.77353	8.14806e-21	4.16218e-20	36.3341
GOBP_CILIUM_ORGANIZATION	-0.177531	-0.0327294	-9.76421	8.80566e-21	4.49372e-20	36.2575
GOBP_REGULATION_OF_LYMPHOID_PROGENITOR_CELL_DIFFERENTIATION	-0.323551	-0.0259557	-9.75908	9.19035e-21	4.68547e-20	36.2153
GOBP_REGULATION_OF_NUCLEAR_TRANSCRIBED_MRNA_CATABOLIC_PROCESS_DEADENYLATION_DEPENDENT_DECAY	-0.281507	-0.0321812	-9.75689	9.35941e-21	4.76702e-20	36.1973
GOBP_POSITIVE_REGULATION_OF_CAMP_MEDIATED_SIGNALING	0.209741	-0.0189441	9.75132	9.80359e-21	4.98841e-20	36.1515
GOBP_POSITIVE_REGULATION_OF_GLUCOSE_IMPORT	-0.187322	-0.0172266	-9.75035	9.88253e-21	5.0237e-20	36.1436
GOBP_NEGATIVE_REGULATION_OF_PROTEASOMAL_UBIQUITIN_DEPENDENT_PROTEIN_CATABOLIC_PROCESS	-0.216885	-0.0354996	-9.74501	1.03321e-20	5.24715e-20	36.0996
GOBP_FOLIC_ACID_CONTAINING_COMPOUND_METABOLIC_PROCESS	-0.210254	-0.0391598	-9.73741	1.10058e-20	5.58385e-20	36.0373
GOBP_CELLULAR_RESPONSE_TO_ALCOHOL	-0.131933	-0.0258629	-9.73582	1.11518e-20	5.65248e-20	36.0242
GOBP_REGULATION_OF_MITOCHONDRION_ORGANIZATION	-0.141634	-0.0437585	-9.73137	1.1572e-20	5.85981e-20	35.9877
GOBP_RESPONSE_TO_TRANSFORMING_GROWTH_FACTOR_BETA	-0.148017	-0.0288462	-9.72814	1.18872e-20	6.01361e-20	35.9612
GOBP_POSITIVE_REGULATION_OF_TRANSCRIPTION_FROM_RNA_POLYMERASE_II_PROMOTER_INVOLVED_IN_CELLULAR_RESPONSE_TO_CHEMICAL_STIMULUS	-0.265517	-0.0264678	-9.72262	1.2445e-20	6.28968e-20	35.9159
GOBP_NEGATIVE_REGULATION_BY_HOST_OF_VIRAL_PROCESS	-0.216274	-0.00335671	-9.72126	1.25865e-20	6.35507e-20	35.9047
GOBP_RESPONSE_TO_MANGANESE_ION	-0.200061	-0.0401245	-9.72067	1.2648e-20	6.37998e-20	35.8999
GOBP_NEGATIVE_REGULATION_OF_MRNA_PROCESSING	-0.295551	-0.0371138	-9.71944	1.27776e-20	6.43917e-20	35.8899
GOBP_TETRAPYRROLE_METABOLIC_PROCESS	-0.149916	-0.0339199	-9.71731	1.30061e-20	6.54627e-20	35.8724
GOBP_REGULATION_OF_CELL_SUBSTRATE_JUNCTION_ORGANIZATION	-0.197404	-0.0378463	-9.71722	1.30151e-20	6.54627e-20	35.8717
GOBP_REGULATION_OF_CELL_DIVISION	-0.112399	-0.0316849	-9.71629	1.31163e-20	6.59083e-20	35.864
GOBP_CHROMATIN_REMODELING	-0.201613	-0.0264669	-9.71399	1.33691e-20	6.71143e-20	35.8452
GOBP_POSITIVE_REGULATION_OF_DENDRITIC_CELL_CYTOKINE_PRODUCTION	-0.260478	-0.0445697	-9.7078	1.40735e-20	7.05832e-20	35.7945
GOBP_SECRETORY_GRANULE_ORGANIZATION	-0.148717	-0.0295088	-9.70086	1.49074e-20	7.46936e-20	35.7376
GOBP_PROTEIN_O_LINKED_GLYCOSYLATION_VIA_SERINE	-0.234052	-0.0365248	-9.70036	1.49695e-20	7.49333e-20	35.7335
GOBP_POSITIVE_REGULATION_OF_LAMELLIPODIUM_ORGANIZATION	-0.237286	-0.0346089	-9.69852	1.51991e-20	7.60102e-20	35.7185
GOBP_COENZYME_A_BIOSYNTHETIC_PROCESS	-0.21209	-0.0510197	-9.69798	1.52681e-20	7.62821e-20	35.714
GOBP_UBIQUITIN_DEPENDENT_PROTEIN_CATABOLIC_PROCESS_VIA_THE_MULTIVESICULAR_BODY_SORTING_PATHWAY	-0.241395	-0.0392041	-9.69235	1.59963e-20	7.98443e-20	35.668
GOBP_MICROTUBULE_POLYMERIZATION	-0.195489	-0.0373723	-9.68817	1.65602e-20	8.25802e-20	35.6338
GOBP_TELENCEPHALON_GLIAL_CELL_MIGRATION	-0.255127	-0.0459108	-9.68078	1.76057e-20	8.77107e-20	35.5734
GOBP_REGULATION_OF_NUCLEAR_DIVISION	-0.185608	-0.0424889	-9.67881	1.7896e-20	8.90723e-20	35.5572
GOBP_ESTABLISHMENT_OF_PROTEIN_LOCALIZATION_TO_CHROMOSOME	-0.306523	-0.0370372	-9.67726	1.81269e-20	9.01359e-20	35.5446
GOBP_ANOIKIS	-0.196883	-0.0392706	-9.67192	1.89459e-20	9.41191e-20	35.5009
GOBP_REGULATION_OF_DEACETYLASE_ACTIVITY	-0.258991	-0.0313399	-9.6702	1.92166e-20	9.53734e-20	35.4869
GOBP_POSITIVE_REGULATION_OF_ATP_DEPENDENT_ACTIVITY	-0.149597	-0.0401701	-9.66964	1.93066e-20	9.57294e-20	35.4823
GOBP_RESPONSE_TO_UV_C	-0.273737	-0.0486482	-9.65849	2.11723e-20	1.04881e-19	35.3913
GOBP_SYNAPTIC_VESICLE_TRANSPORT	-0.228738	-0.0451082	-9.65285	2.21815e-20	1.09776e-19	35.3453
GOBP_POSITIVE_REGULATION_OF_STEM_CELL_DIFFERENTIATION	-0.171999	-0.0165703	-9.65055	2.26067e-20	1.11775e-19	35.3265
GOBP_HAIR_FOLLICLE_MATURATION	-0.198673	-0.0315003	-9.63787	2.51036e-20	1.24004e-19	35.2231
GOBP_CELLULAR_RESPONSE_TO_ABIOTIC_STIMULUS	-0.138737	-0.0389758	-9.63389	2.59408e-20	1.28018e-19	35.1907
GOBP_VACUOLAR_ACIDIFICATION	-0.234035	-0.0356971	-9.63169	2.64165e-20	1.30244e-19	35.1728
GOBP_NEGATIVE_REGULATION_OF_PHOSPHATASE_ACTIVITY	-0.158949	-0.0426487	-9.60904	3.18409e-20	1.5684e-19	34.9884
GOBP_HEMATOPOIETIC_STEM_CELL_HOMEOSTASIS	-0.195469	-0.0417836	-9.60703	3.23733e-20	1.59313e-19	34.972
GOBP_FUSION_OF_SPERM_TO_EGG_PLASMA_MEMBRANE_INVOLVED_IN_SINGLE_FERTILIZATION	0.193091	0.0150027	9.60315	3.34245e-20	1.64332e-19	34.9405
GOBP_MICROTUBULE_POLYMERIZATION_OR_DEPOLYMERIZATION	-0.180071	-0.0326664	-9.59569	3.55408e-20	1.74562e-19	34.8799
GOBP_RIBOSE_PHOSPHATE_BIOSYNTHETIC_PROCESS	-0.123419	-0.0440809	-9.59559	3.55718e-20	1.74562e-19	34.879
GOBP_CELLULAR_RESPONSE_TO_PEPTIDE_HORMONE_STIMULUS	-0.129453	-0.0268394	-9.59287	3.63752e-20	1.78337e-19	34.857
GOBP_PTERIDINE_CONTAINING_COMPOUND_METABOLIC_PROCESS	-0.185969	-0.0421049	-9.59258	3.64629e-20	1.786e-19	34.8546
GOBP_MITOCHONDRIAL_MEMBRANE_ORGANIZATION	-0.166069	-0.0505099	-9.5899	3.72747e-20	1.82406e-19	34.8329
GOBP_RNA_SPLICING_VIA_TRANSESTERIFICATION_REACTIONS	-0.252708	-0.0273949	-9.58835	3.77536e-20	1.84577e-19	34.8203
GOBP_REGULATION_OF_NUCLEAR_TRANSCRIBED_MRNA_POLY_A_TAIL_SHORTENING	-0.304767	-0.0315509	-9.5858	3.85559e-20	1.88324e-19	34.7995
GOBP_REGULATION_OF_EXECUTION_PHASE_OF_APOPTOSIS	0.205063	-0.0199542	9.58499	3.8812e-20	1.89398e-19	34.793
GOBP_ERYTHROCYTE_DEVELOPMENT	-0.177255	-0.0295362	-9.58162	3.99031e-20	1.94542e-19	34.7656
GOBP_HISTONE_EXCHANGE	-0.220894	-0.030015	-9.56957	4.40581e-20	2.14599e-19	34.6678
GOBP_CORPUS_CALLOSUM_DEVELOPMENT	-0.239737	-0.0401987	-9.56836	4.44989e-20	2.16545e-19	34.658
GOBP_NEGATIVE_REGULATION_OF_CHROMATIN_BINDING	-0.288713	-0.0220209	-9.56693	4.50214e-20	2.18884e-19	34.6465
GOBP_NUCLEAR_MIGRATION	-0.235944	-0.0400177	-9.55243	5.07161e-20	2.46342e-19	34.5289
GOBP_PIGMENT_METABOLIC_PROCESS	-0.140354	-0.0248902	-9.55091	5.13512e-20	2.49196e-19	34.5166
GOBP_POST_EMBRYONIC_DEVELOPMENT	-0.176515	-0.0194336	-9.54761	5.27618e-20	2.55804e-19	34.4899
GOBP_RIBOSE_PHOSPHATE_METABOLIC_PROCESS	-0.113063	-0.0380645	-9.54109	5.56583e-20	2.69598e-19	34.4371
GOBP_MEMBRANE_BIOGENESIS	-0.173731	-0.0461452	-9.53392	5.90265e-20	2.85649e-19	34.3791
GOBP_CELL_CELL_ADHESION_MEDIATED_BY_CADHERIN	-0.153938	-0.0324745	-9.53027	6.08197e-20	2.94055e-19	34.3496
GOBP_CYTOPLASMIC_MICROTUBULE_ORGANIZATION	-0.192684	-0.0312845	-9.5275	6.22143e-20	3.00521e-19	34.3272
GOBP_PLASMA_MEMBRANE_FUSION	0.177039	0.003802	9.52068	6.57917e-20	3.17509e-19	34.272
GOBP_POSITIVE_REGULATION_OF_PEPTIDYL_LYSINE_ACETYLATION	-0.151092	-0.032935	-9.51793	6.72879e-20	3.24431e-19	34.2498
GOBP_NEGATIVE_REGULATION_OF_FATTY_ACID_METABOLIC_PROCESS	-0.146745	-0.0203806	-9.51666	6.79931e-20	3.27529e-19	34.2395
GOBP_RIBONUCLEOPROTEIN_COMPLEX_BIOGENESIS	-0.265992	-0.0295046	-9.51461	6.91402e-20	3.32749e-19	34.223
GOBP_VIRAL_PROTEIN_PROCESSING	-0.246221	-0.0493079	-9.50091	7.73393e-20	3.71867e-19	34.1124
GOBP_LIPID_DROPLET_ORGANIZATION	-0.183498	-0.0424562	-9.4872	8.65055e-20	4.15559e-19	34.0019
GOBP_POSITIVE_REGULATION_OF_PROTEIN_DEPHOSPHORYLATION	-0.193574	-0.0421212	-9.47822	9.30856e-20	4.4676e-19	33.9295
GOBP_MOTOR_BEHAVIOR	-0.225133	-0.0286179	-9.47319	9.6987e-20	4.65058e-19	33.889
GOBP_INTRINSIC_APOPTOTIC_SIGNALING_PATHWAY_IN_RESPONSE_TO_ENDOPLASMIC_RETICULUM_STRESS	-0.174133	-0.0439301	-9.45815	1.09644e-19	5.25268e-19	33.7679
GOBP_EMBRYONIC_APPENDAGE_MORPHOGENESIS	-0.135822	-0.0162333	-9.4578	1.09956e-19	5.26282e-19	33.7651
GOBP_HISTONE_H3_ACETYLATION	-0.238655	-0.0295533	-9.45548	1.12059e-19	5.35858e-19	33.7464
GOBP_EXONUCLEOLYTIC_CATABOLISM_OF_DEADENYLATED_MRNA	-0.3283	-0.04815	-9.44491	1.22133e-19	5.83501e-19	33.6615
GOBP_CHAPERONE_COFACTOR_DEPENDENT_PROTEIN_REFOLDING	-0.219589	-0.0367725	-9.43911	1.28042e-19	6.11172e-19	33.6149
GOBP_REGULATION_OF_PROTEIN_TARGETING	-0.157753	-0.0415943	-9.43402	1.33457e-19	6.3644e-19	33.574
GOBP_PLACENTA_BLOOD_VESSEL_DEVELOPMENT	-0.17535	-0.0322433	-9.43322	1.3432e-19	6.39975e-19	33.5676
GOBP_REGULATION_OF_FIBROBLAST_MIGRATION	-0.17793	-0.0386521	-9.42089	1.4849e-19	7.06843e-19	33.4687
GOBP_NUCLEAR_MEMBRANE_REASSEMBLY	-0.271841	-0.0451932	-9.41794	1.52092e-19	7.23332e-19	33.445
GOBP_VESICLE_CYTOSKELETAL_TRAFFICKING	-0.18645	-0.0460846	-9.41748	1.52662e-19	7.25388e-19	33.4413
GOBP_IRON_SULFUR_CLUSTER_ASSEMBLY	-0.272978	-0.0397894	-9.41517	1.55563e-19	7.385e-19	33.4227
GOBP_REGULATION_OF_CHOLESTEROL_ESTERIFICATION	0.222533	-0.0151068	9.41211	1.59474e-19	7.56383e-19	33.3982
GOBP_N_TERMINAL_PROTEIN_AMINO_ACID_ACETYLATION	-0.264061	-0.0359822	-9.41156	1.60184e-19	7.59062e-19	33.3939
GOBP_UV_DAMAGE_EXCISION_REPAIR	-0.303309	-0.0321987	-9.40614	1.67399e-19	7.92535e-19	33.3504
GOBP_POSITIVE_REGULATION_OF_GLUCOSE_TRANSMEMBRANE_TRANSPORT	-0.17566	-0.0152373	-9.40515	1.68743e-19	7.98179e-19	33.3425
GOBP_SMAD_PROTEIN_COMPLEX_ASSEMBLY	-0.272256	-0.037938	-9.405	1.68954e-19	7.98455e-19	33.3413
GOBP_REGULATION_OF_PROTEIN_CONTAINING_COMPLEX_ASSEMBLY	-0.135384	-0.0372356	-9.38309	2.01825e-19	9.52939e-19	33.1658
GOBP_LUNG_ALVEOLUS_DEVELOPMENT	-0.153004	-0.024759	-9.38216	2.03347e-19	9.59265e-19	33.1584
GOBP_NEGATIVE_REGULATION_OF_FATTY_ACID_BIOSYNTHETIC_PROCESS	-0.167506	-0.0096927	-9.38184	2.03877e-19	9.60901e-19	33.1559
GOBP_CANONICAL_WNT_SIGNALING_PATHWAY	-0.121569	-0.0282519	-9.37856	2.0936e-19	9.85854e-19	33.1297
GOBP_ANTIMICROBIAL_HUMORAL_IMMUNE_RESPONSE_MEDIATED_BY_ANTIMICROBIAL_PEPTIDE	0.17295	0.0234919	9.35829	2.46704e-19	1.16066e-18	32.9677
GOBP_NEGATIVE_REGULATION_OF_PROTEOLYSIS_INVOLVED_IN_CELLULAR_PROTEIN_CATABOLIC_PROCESS	-0.200132	-0.0331676	-9.35637	2.50565e-19	1.17777e-18	32.9524
GOBP_GMP_METABOLIC_PROCESS	-0.174837	-0.0323867	-9.35477	2.53845e-19	1.19212e-18	32.9396
GOBP_MITOCHONDRION_MORPHOGENESIS	-0.201341	-0.0357142	-9.35437	2.54662e-19	1.19488e-18	32.9364
GOBP_PORPHYRIN_CONTAINING_COMPOUND_METABOLIC_PROCESS	-0.151469	-0.0335448	-9.34679	2.70767e-19	1.26931e-18	32.8759
GOBP_CEREBELLAR_CORTEX_DEVELOPMENT	-0.187458	-0.0339731	-9.34478	2.7519e-19	1.28889e-18	32.8599
GOBP_RESPONSE_TO_L_GLUTAMATE	-0.229579	-0.0397084	-9.34246	2.80408e-19	1.31216e-18	32.8414
GOBP_REGULATION_OF_DNA_TEMPLATED_TRANSCRIPTION_IN_RESPONSE_TO_STRESS	-0.20436	-0.0409707	-9.33449	2.99046e-19	1.39734e-18	32.7779
GOBP_NEGATIVE_REGULATION_OF_CELL_FATE_COMMITMENT	0.225369	-0.00294164	9.33445	2.99144e-19	1.39734e-18	32.7776
GOBP_ACTIN_NUCLEATION	-0.163501	-0.0488351	-9.32952	3.11293e-19	1.45279e-18	32.7383
GOBP_NEGATIVE_REGULATION_OF_INTRINSIC_APOPTOTIC_SIGNALING_PATHWAY	-0.16334	-0.0370143	-9.32113	3.33119e-19	1.55327e-18	32.6714
GOBP_NUCLEAR_TRANSCRIBED_MRNA_CATABOLIC_PROCESS_EXONUCLEOLYTIC	-0.308089	-0.0489309	-9.31988	3.36498e-19	1.56763e-18	32.6615
GOBP_POSITIVE_REGULATION_OF_NEUROGENESIS	-0.131351	-0.0313027	-9.31967	3.37053e-19	1.56882e-18	32.6598
GOBP_RESPONSE_TO_PEPTIDE_HORMONE	-0.114966	-0.0250022	-9.31557	3.48395e-19	1.62018e-18	32.6272
GOBP_CENTRAL_NERVOUS_SYSTEM_NEURON_AXONOGENESIS	-0.229768	-0.0375096	-9.31404	3.52729e-19	1.63888e-18	32.615
GOBP_MITOTIC_G1_S_TRANSITION_CHECKPOINT_SIGNALING	-0.211223	-0.0384075	-9.31186	3.5896e-19	1.66635e-18	32.5977
GOBP_REGULATION_OF_CELL_MORPHOGENESIS	-0.136726	-0.0382438	-9.29628	4.06993e-19	1.88765e-18	32.4738
GOBP_VESICLE_TRANSPORT_ALONG_MICROTUBULE	-0.223754	-0.0446325	-9.29303	4.17779e-19	1.93597e-18	32.448
GOBP_MEIOTIC_SPINDLE_ORGANIZATION	-0.263716	-0.050497	-9.29037	4.26819e-19	1.97611e-18	32.4269
GOBP_REGULATION_OF_OXIDATIVE_STRESS_INDUCED_INTRINSIC_APOPTOTIC_SIGNALING_PATHWAY	-0.185172	-0.0402944	-9.28764	4.36329e-19	2.01836e-18	32.4052
GOBP_IMP_METABOLIC_PROCESS	-0.184187	-0.0372123	-9.28624	4.41265e-19	2.03939e-18	32.3941
GOBP_TRANSFERRIN_TRANSPORT	-0.268486	-0.0491189	-9.28573	4.43073e-19	2.04594e-18	32.39
GOBP_REGULATION_OF_BINDING	-0.13147	-0.0326274	-9.28114	4.59757e-19	2.12112e-18	32.3536
GOBP_ENDODERM_DEVELOPMENT	-0.162711	-0.0278934	-9.28082	4.60939e-19	2.1247e-18	32.351
GOBP_PHOSPHOLIPID_METABOLIC_PROCESS	-0.126437	-0.036297	-9.28063	4.61645e-19	2.12608e-18	32.3495
GOBP_SENSORY_PERCEPTION_OF_TASTE	0.135679	0.0146297	9.27531	4.81807e-19	2.21699e-18	32.3073
GOBP_REGULATION_OF_PROTEIN_BINDING	-0.128367	-0.0356008	-9.27045	5.01017e-19	2.30336e-18	32.2688
GOBP_CELL_DEATH_IN_RESPONSE_TO_OXIDATIVE_STRESS	-0.1452	-0.0366701	-9.26914	5.06342e-19	2.3258e-18	32.2583
GOBP_PROTEIN_DNA_COMPLEX_ASSEMBLY	-0.181672	-0.035343	-9.26689	5.15565e-19	2.36592e-18	32.2405
GOBP_NEGATIVE_REGULATION_OF_PROTEIN_LOCALIZATION_TO_NUCLEUS	-0.186133	-0.0318974	-9.26679	5.15979e-19	2.36592e-18	32.2397
GOBP_HYDROGEN_PEROXIDE_METABOLIC_PROCESS	0.152367	-0.0170107	9.2554	5.65417e-19	2.59034e-18	32.1495
GOBP_CENTROMERE_COMPLEX_ASSEMBLY	-0.312365	-0.0568026	-9.24918	5.94375e-19	2.72063e-18	32.1002
GOBP_PH_REDUCTION	-0.182677	-0.0344727	-9.23775	6.51425e-19	2.97916e-18	32.0098
GOBP_ACTIN_MYOSIN_FILAMENT_SLIDING	0.221086	-0.0256987	9.23006	6.92841e-19	3.16581e-18	31.949
GOBP_REGULATION_OF_GLUCAN_BIOSYNTHETIC_PROCESS	-0.154456	-0.0314475	-9.22719	7.09011e-19	3.23687e-18	31.9263
GOBP_INDUCTION_OF_POSITIVE_CHEMOTAXIS	0.213461	-0.00474508	9.21863	7.59317e-19	3.46352e-18	31.8586
GOBP_OXYGEN_TRANSPORT	0.296633	-0.0049488	9.2175	7.66187e-19	3.49181e-18	31.8498
GOBP_LIPOSACCHARIDE_METABOLIC_PROCESS	-0.157961	-0.044392	-9.2133	7.92436e-19	3.6083e-18	31.8165
GOBP_POSITIVE_REGULATION_OF_BINDING	-0.145348	-0.0324201	-9.2128	7.95595e-19	3.61954e-18	31.8126
GOBP_REGULATION_OF_GENERATION_OF_PRECURSOR_METABOLITES_AND_ENERGY	-0.122061	-0.0360979	-9.21123	8.05621e-19	3.66198e-18	31.8003
GOBP_LIPOPROTEIN_LOCALIZATION	-0.217856	-0.0141977	-9.20794	8.27143e-19	3.75655e-18	31.7742
GOBP_REGULATION_OF_ACTIVIN_RECEPTOR_SIGNALING_PATHWAY	-0.177442	-0.0258724	-9.20757	8.29579e-19	3.76388e-18	31.7713
GOBP_MATURATION_OF_5_8S_RRNA	-0.29976	-0.0364786	-9.20748	8.30194e-19	3.76388e-18	31.7706
GOBP_SULFUR_COMPOUND_BIOSYNTHETIC_PROCESS	-0.127064	-0.0415349	-9.2022	8.65998e-19	3.92281e-18	31.729
GOBP_MONOSACCHARIDE_METABOLIC_PROCESS	-0.105825	-0.0334733	-9.19751	8.9906e-19	4.06906e-18	31.692
GOBP_MAINTENANCE_OF_PROTEIN_LOCALIZATION_IN_ENDOPLASMIC_RETICULUM	-0.22177	-0.0498173	-9.19633	9.07614e-19	4.10423e-18	31.6827
GOBP_RESPONSE_TO_OXIDATIVE_STRESS	-0.116355	-0.0336312	-9.19231	9.37233e-19	4.23452e-18	31.651
GOBP_CELLULAR_RESPONSE_TO_DEXAMETHASONE_STIMULUS	-0.179222	-0.0242354	-9.18665	9.80577e-19	4.42653e-18	31.6064
GOBP_TETRAHYDROFOLATE_METABOLIC_PROCESS	-0.210118	-0.0409645	-9.18238	1.01464e-18	4.57636e-18	31.5727
GOBP_CEREBELLAR_PURKINJE_CELL_LAYER_DEVELOPMENT	-0.181792	-0.0366609	-9.17456	1.08e-18	4.86695e-18	31.5112
GOBP_NEGATIVE_REGULATION_OF_PEPTIDYL_SERINE_PHOSPHORYLATION	-0.163744	-0.0355011	-9.17379	1.08665e-18	4.88975e-18	31.5051
GOBP_NEGATIVE_REGULATION_OF_STEROL_TRANSPORT	0.153649	0.0205675	9.17376	1.08692e-18	4.88975e-18	31.5049
GOBP_HIPPO_SIGNALING	-0.219652	-0.0359486	-9.17207	1.10164e-18	4.95172e-18	31.4916
GOBP_DNA_METHYLATION	-0.143859	-0.0334404	-9.16758	1.14181e-18	5.12788e-18	31.4563
GOBP_KERATINOCYTE_MIGRATION	-0.197001	-0.0208166	-9.16673	1.14959e-18	5.15841e-18	31.4496
GOBP_POSITIVE_REGULATION_OF_CHROMOSOME_SEGREGATION	-0.288243	-0.0490797	-9.16556	1.16038e-18	5.20235e-18	31.4404
GOBP_HINDBRAIN_DEVELOPMENT	-0.129162	-0.0256605	-9.15807	1.23178e-18	5.51772e-18	31.3815
GOBP_ENERGY_HOMEOSTASIS	-0.140946	-0.0365197	-9.15627	1.24957e-18	5.59264e-18	31.3673
GOBP_REGULATION_OF_CARBOHYDRATE_BIOSYNTHETIC_PROCESS	-0.109763	-0.0315544	-9.15156	1.29737e-18	5.80165e-18	31.3303
GOBP_REGULATION_OF_HISTONE_H4_ACETYLATION	-0.231866	-0.042298	-9.14851	1.32934e-18	5.93955e-18	31.3063
GOBP_NEGATIVE_REGULATION_OF_TRANSFORMING_GROWTH_FACTOR_BETA_RECEPTOR_SIGNALING_PATHWAY	-0.132082	-0.0317833	-9.14408	1.37705e-18	6.14746e-18	31.2715
GOBP_LOCOMOTION_INVOLVED_IN_LOCOMOTORY_BEHAVIOR	-0.190071	-0.0166377	-9.13574	1.47157e-18	6.56382e-18	31.2061
GOBP_TROPHOBLAST_CELL_MIGRATION	-0.196537	-0.034968	-9.12889	1.55399e-18	6.92557e-18	31.1523
GOBP_PTERIDINE_CONTAINING_COMPOUND_BIOSYNTHETIC_PROCESS	-0.242345	-0.0507855	-9.11531	1.73113e-18	7.70846e-18	31.0459
GOBP_IRES_DEPENDENT_VIRAL_TRANSLATIONAL_INITIATION	-0.326691	-0.049697	-9.11401	1.74909e-18	7.7818e-18	31.0357
GOBP_PROTEIN_HETEROTETRAMERIZATION	-0.225024	-0.0263531	-9.10872	1.82418e-18	8.10902e-18	30.9942
GOBP_REGULATION_OF_GASTRIC_ACID_SECRETION	0.220029	-0.0151918	9.10792	1.83567e-18	8.15319e-18	30.988
GOBP_VIRION_ASSEMBLY	-0.234662	-0.0377207	-9.09697	2.00248e-18	8.88655e-18	30.9023
GOBP_POSITIVE_REGULATION_OF_MICROTUBULE_POLYMERIZATION_OR_DEPOLYMERIZATION	-0.189987	-0.0305906	-9.09482	2.03689e-18	9.03159e-18	30.8855
GOBP_APICAL_PROTEIN_LOCALIZATION	-0.186234	-0.0411133	-9.09211	2.08104e-18	9.21955e-18	30.8643
GOBP_FEMALE_MEIOTIC_NUCLEAR_DIVISION	-0.210188	-0.0423764	-9.08387	2.22153e-18	9.83366e-18	30.7999
GOBP_MITOTIC_DNA_REPLICATION	-0.319396	-0.0482236	-9.08064	2.27922e-18	1.00805e-17	30.7746
GOBP_FOCAL_ADHESION_ASSEMBLY	-0.171707	-0.036592	-9.07933	2.30294e-18	1.01768e-17	30.7644
GOBP_CHROMATIN_ASSEMBLY_OR_DISASSEMBLY	-0.186047	-0.0276909	-9.07905	2.30814e-18	1.01912e-17	30.7622
GOBP_AXO_DENDRITIC_TRANSPORT	-0.227445	-0.0406966	-9.07783	2.33057e-18	1.02816e-17	30.7527
GOBP_REGULATION_OF_CELLULAR_PH	-0.149657	-0.0384724	-9.07205	2.43962e-18	1.07536e-17	30.7076
GOBP_REGULATION_OF_MITOTIC_CELL_CYCLE_SPINDLE_ASSEMBLY_CHECKPOINT	-0.237082	-0.0513264	-9.06329	2.61481e-18	1.15162e-17	30.6392
GOBP_REGULATION_OF_KERATINOCYTE_MIGRATION	-0.236322	-0.0257832	-9.0629	2.62288e-18	1.1542e-17	30.6361
GOBP_NEGATIVE_REGULATION_OF_UBIQUITIN_DEPENDENT_PROTEIN_CATABOLIC_PROCESS	-0.212585	-0.0344763	-9.06132	2.65599e-18	1.16779e-17	30.6238
GOBP_REGULATION_OF_ARP2_3_COMPLEX_MEDIATED_ACTIN_NUCLEATION	-0.190899	-0.0476369	-9.06105	2.66153e-18	1.16924e-17	30.6217
GOBP_POSITIVE_REGULATION_OF_CYTOPLASMIC_TRANSPORT	-0.228993	-0.0343864	-9.05836	2.71885e-18	1.19342e-17	30.6007
GOBP_POSITIVE_REGULATION_OF_PROTEIN_LOCALIZATION_TO_MEMBRANE	-0.138736	-0.0401106	-9.05043	2.89482e-18	1.2696e-17	30.5389
GOBP_EPITHELIAL_CELL_MATURATION	-0.17397	-0.0185351	-9.04787	2.95392e-18	1.29444e-17	30.519
GOBP_REGULATION_OF_FILOPODIUM_ASSEMBLY	-0.168509	-0.0448241	-9.04505	3.02059e-18	1.32255e-17	30.4969
GOBP_CELL_SUBSTRATE_JUNCTION_ORGANIZATION	-0.176678	-0.0368839	-9.03881	3.17328e-18	1.38824e-17	30.4483
GOBP_NEGATIVE_REGULATION_OF_EXECUTION_PHASE_OF_APOPTOSIS	0.237946	-0.0135324	9.03649	3.23187e-18	1.4127e-17	30.4303
GOBP_NEGATIVE_REGULATION_OF_RECEPTOR_SIGNALING_PATHWAY_VIA_STAT	-0.150137	-0.0358609	-9.03401	3.29569e-18	1.43939e-17	30.411
GOBP_REGULATION_OF_NITRIC_OXIDE_MEDIATED_SIGNAL_TRANSDUCTION	-0.241616	0.00526306	-9.02209	3.62088e-18	1.5801e-17	30.3182
GOBP_POSITIVE_REGULATION_OF_CELL_SIZE	-0.259235	-0.0329209	-9.01752	3.7538e-18	1.63675e-17	30.2827
GOBP_CELLULAR_RESPONSE_TO_EXTERNAL_STIMULUS	-0.131034	-0.0349733	-9.00691	4.08119e-18	1.77802e-17	30.2002
GOBP_NUCLEOTIDE_SUGAR_BIOSYNTHETIC_PROCESS	-0.248738	-0.0535086	-9.0056	4.12336e-18	1.79489e-17	30.1901
GOBP_EMBRYONIC_VISCEROCRANIUM_MORPHOGENESIS	-0.243456	-0.00619765	-9.00163	4.25427e-18	1.85034e-17	30.1593
GOBP_ACYLGLYCEROL_HOMEOSTASIS	0.125928	-0.0154533	8.9927	4.56434e-18	1.98356e-17	30.0899
GOBP_PYRIMIDINE_CONTAINING_COMPOUND_METABOLIC_PROCESS	-0.144164	-0.0435753	-8.98247	4.94689e-18	2.14802e-17	30.0106
GOBP_VIRAL_TRANSCRIPTION	-0.210728	-0.0400199	-8.98115	4.99827e-18	2.16854e-17	30.0004
GOBP_NEGATIVE_REGULATION_OF_JNK_CASCADE	-0.175035	-0.0312497	-8.97898	5.08434e-18	2.20406e-17	29.9836
GOBP_PHOSPHATIDYLINOSITOL_DEPHOSPHORYLATION	-0.225896	-0.0298423	-8.9707	5.42622e-18	2.35032e-17	29.9194
GOBP_ASYMMETRIC_CELL_DIVISION	-0.197036	-0.0412324	-8.97001	5.4556e-18	2.36109e-17	29.9141
GOBP_MITOCHONDRIAL_TRANSPORT	-0.154874	-0.0477974	-8.96865	5.51438e-18	2.38456e-17	29.9035
GOBP_POSITIVE_REGULATION_OF_STEM_CELL_POPULATION_MAINTENANCE	-0.246905	-0.0267178	-8.96507	5.6713e-18	2.45039e-17	29.8759
GOBP_CELLULAR_RESPONSE_TO_MINERALOCORTICOID_STIMULUS	-0.231942	-0.0292416	-8.962	5.81e-18	2.50825e-17	29.8521
GOBP_BASE_EXCISION_REPAIR	-0.247428	-0.0430699	-8.96121	5.84618e-18	2.5218e-17	29.8459
GOBP_REGULATION_OF_CHROMATIN_BINDING	-0.21937	-0.0317362	-8.95637	6.07222e-18	2.61715e-17	29.8086
GOBP_PIGMENT_GRANULE_ORGANIZATION	-0.173364	-0.0398882	-8.95469	6.15314e-18	2.64985e-17	29.7955
GOBP_PROTEIN_K11_LINKED_DEUBIQUITINATION	-0.269412	-0.0228281	-8.95365	6.2035e-18	2.66934e-17	29.7875
GOBP_PROTEIN_POLYMERIZATION	-0.129519	-0.0397267	-8.95017	6.37492e-18	2.74085e-17	29.7606
GOBP_PHOSPHATIDYLGLYCEROL_METABOLIC_PROCESS	-0.123613	-0.0314604	-8.94577	6.59885e-18	2.8348e-17	29.7266
GOBP_REGULATION_OF_LAMELLIPODIUM_ASSEMBLY	-0.219767	-0.0307895	-8.94278	6.75522e-18	2.8996e-17	29.7035
GOBP_POSITIVE_REGULATION_OF_PROTEIN_LOCALIZATION_TO_CELL_PERIPHERY	-0.14329	-0.0353333	-8.94185	6.80498e-18	2.91857e-17	29.6962
GOBP_ORGANOPHOSPHATE_ESTER_TRANSPORT	-0.117237	-0.0412524	-8.94027	6.88937e-18	2.95235e-17	29.6841
GOBP_ANATOMICAL_STRUCTURE_ARRANGEMENT	-0.188175	-0.0156879	-8.93838	6.99258e-18	2.99413e-17	29.6694
GOBP_PROTEIN_DEPOLYMERIZATION	-0.152685	-0.0353427	-8.934	7.23639e-18	3.09599e-17	29.6357
GOBP_RESPONSE_TO_DEXAMETHASONE	-0.162749	-0.0241236	-8.93168	7.36919e-18	3.15024e-17	29.6177
GOBP_AXON_EXTENSION	-0.166849	-0.0376839	-8.92862	7.54759e-18	3.22387e-17	29.5942
GOBP_CHROMOSOME_CONDENSATION	-0.227663	-0.0349408	-8.92564	7.72596e-18	3.29737e-17	29.5711
GOBP_NEGATIVE_REGULATION_OF_RESPONSE_TO_ENDOPLASMIC_RETICULUM_STRESS	-0.188007	-0.041945	-8.91531	8.37648e-18	3.5721e-17	29.4914
GOBP_PEPTIDYL_CYSTEINE_MODIFICATION	-0.163052	-0.0423189	-8.91052	8.69628e-18	3.70546e-17	29.4545
GOBP_NEGATIVE_REGULATION_OF_APOPTOTIC_SIGNALING_PATHWAY	-0.137406	-0.0311036	-8.90996	8.73449e-18	3.71872e-17	29.4502
GOBP_RRNA_MODIFICATION	-0.280933	-0.0441023	-8.90426	9.13249e-18	3.88501e-17	29.4063
GOBP_NEGATIVE_REGULATION_OF_TYPE_I_INTERFERON_MEDIATED_SIGNALING_PATHWAY	-0.250384	-0.0467439	-8.9041	9.14359e-18	3.88658e-17	29.4051
GOBP_REGULATION_OF_EPIDERMAL_GROWTH_FACTOR_ACTIVATED_RECEPTOR_ACTIVITY	-0.169133	-0.0460707	-8.89813	9.58042e-18	4.06896e-17	29.3591
GOBP_RNA_PHOSPHODIESTER_BOND_HYDROLYSIS_ENDONUCLEOLYTIC	-0.182063	-0.0375568	-8.89229	1.00269e-17	4.25514e-17	29.3142
GOBP_DETECTION_OF_CHEMICAL_STIMULUS_INVOLVED_IN_SENSORY_PERCEPTION_OF_TASTE	0.135085	0.0193641	8.88789	1.03774e-17	4.40034e-17	29.2803
GOBP_CELL_REDOX_HOMEOSTASIS	-0.192608	-0.0457768	-8.8865	1.04906e-17	4.44471e-17	29.2696
GOBP_GAS_HOMEOSTASIS	-0.208303	-0.0348702	-8.87791	1.12174e-17	4.74883e-17	29.2036
GOBP_MORPHOGENESIS_OF_AN_EPITHELIAL_SHEET	-0.186225	-0.0333627	-8.87614	1.13735e-17	4.81103e-17	29.19
GOBP_NEGATIVE_REGULATION_OF_INTRACELLULAR_PROTEIN_TRANSPORT	-0.158434	-0.0424577	-8.8713	1.18113e-17	4.99216e-17	29.1528
GOBP_SODIUM_INDEPENDENT_ORGANIC_ANION_TRANSPORT	0.197051	0.00407439	8.86424	1.24788e-17	5.27004e-17	29.0986
GOBP_LEUKOTRIENE_D4_METABOLIC_PROCESS	0.23283	-0.0335855	8.85969	1.29296e-17	5.45603e-17	29.0636
GOBP_POSITIVE_REGULATION_OF_AXONOGENESIS	-0.173447	-0.0313298	-8.85917	1.29811e-17	5.47338e-17	29.0597
GOBP_REGULATION_OF_CELLULAR_RESPONSE_TO_HYPOXIA	-0.222673	-0.0473054	-8.85511	1.33987e-17	5.64491e-17	29.0285
GOBP_PLACENTA_DEVELOPMENT	-0.129349	-0.0289811	-8.85414	1.34996e-17	5.68283e-17	29.0211
GOBP_NEGATIVE_REGULATION_OF_STRESS_ACTIVATED_PROTEIN_KINASE_SIGNALING_CASCADE	-0.156565	-0.0356652	-8.85261	1.36618e-17	5.74653e-17	29.0093
GOBP_POSITIVE_REGULATION_OF_LIPOPROTEIN_PARTICLE_CLEARANCE	0.215557	0.00398859	8.83024	1.62577e-17	6.83294e-17	28.8379
GOBP_NEGATIVE_REGULATION_OF_BINDING	-0.119023	-0.0339927	-8.829	1.6414e-17	6.89309e-17	28.8285
GOBP_PROTEIN_COMPLEX_OLIGOMERIZATION	-0.105239	-0.0381767	-8.82431	1.7024e-17	7.14353e-17	28.7925
GOBP_KINETOCHORE_ORGANIZATION	-0.310566	-0.0582622	-8.81713	1.79987e-17	7.54651e-17	28.7376
GOBP_DIGESTION	0.118737	-0.00571297	8.81539	1.8244e-17	7.64325e-17	28.7243
GOBP_CELLULAR_RESPONSE_TO_X_RAY	-0.226664	-0.024494	-8.81401	1.84394e-17	7.71893e-17	28.7138
GOBP_REGULATION_OF_VIRAL_TRANSCRIPTION	-0.215689	-0.0487731	-8.80401	1.99264e-17	8.33472e-17	28.6374
GOBP_DNA_UNWINDING_INVOLVED_IN_DNA_REPLICATION	-0.306277	-0.0475398	-8.79473	2.1413e-17	8.94941e-17	28.5665
GOBP_LYMPHOID_PROGENITOR_CELL_DIFFERENTIATION	-0.200967	-0.027414	-8.7937	2.15838e-17	9.01361e-17	28.5587
GOBP_NEGATIVE_REGULATION_OF_AUTOPHAGOSOME_ASSEMBLY	-0.237577	-0.0372707	-8.7903	2.21601e-17	9.24573e-17	28.5327
GOBP_DRINKING_BEHAVIOR	0.208861	-0.00685189	8.79021	2.21749e-17	9.24573e-17	28.532
GOBP_FOREBRAIN_DEVELOPMENT	-0.12868	-0.0242447	-8.78463	2.31537e-17	9.64615e-17	28.4895
GOBP_REGULATION_OF_CELLULAR_CARBOHYDRATE_CATABOLIC_PROCESS	-0.233376	-0.0454363	-8.78047	2.39121e-17	9.95421e-17	28.4577
GOBP_RRNA_METABOLIC_PROCESS	-0.261115	-0.0296892	-8.77383	2.51722e-17	1.04705e-16	28.4071
GOBP_RIBOSOME_BIOGENESIS	-0.267442	-0.0285268	-8.77368	2.5202e-17	1.04745e-16	28.406
GOBP_NEGATIVE_REGULATION_OF_PROTEIN_MODIFICATION_BY_SMALL_PROTEIN_CONJUGATION_OR_REMOVAL	-0.162547	-0.0336214	-8.75724	2.86148e-17	1.18835e-16	28.2808
GOBP_PROTEIN_LOCALIZATION_TO_CELL_SURFACE	-0.143818	-0.0355717	-8.75525	2.90582e-17	1.20581e-16	28.2657
GOBP_RIBONUCLEOPROTEIN_COMPLEX_SUBUNIT_ORGANIZATION	-0.219912	-0.0344709	-8.75393	2.93558e-17	1.2172e-16	28.2556
GOBP_REGULATION_OF_HISTONE_DEACETYLASE_ACTIVITY	-0.259983	-0.0281417	-8.73718	3.34056e-17	1.38402e-16	28.1283
GOBP_REGULATION_OF_UBIQUITIN_PROTEIN_TRANSFERASE_ACTIVITY	-0.194602	-0.0344988	-8.73704	3.34428e-17	1.38447e-16	28.1272
GOBP_REGULATION_OF_HIPPO_SIGNALING	-0.20396	-0.0442545	-8.73484	3.40139e-17	1.407e-16	28.1105
GOBP_REGULATION_OF_MITOCHONDRIAL_FUSION	-0.205674	-0.0415313	-8.73228	3.46915e-17	1.4339e-16	28.0911
GOBP_NEGATIVE_REGULATION_OF_DIGESTIVE_SYSTEM_PROCESS	0.160767	-0.00777582	8.72532	3.66037e-17	1.51174e-16	28.0382
GOBP_LEFT_RIGHT_AXIS_SPECIFICATION	-0.251105	-0.0427626	-8.71529	3.95406e-17	1.63175e-16	27.9622
GOBP_POSITIVE_REGULATION_OF_CELL_DEVELOPMENT	-0.112617	-0.0307586	-8.70754	4.19708e-17	1.73068e-16	27.9035
GOBP_NEURAL_PRECURSOR_CELL_PROLIFERATION	-0.104809	-0.0314675	-8.70384	4.31805e-17	1.77916e-16	27.8755
GOBP_PROTEIN_LOCALIZATION_TO_PLASMA_MEMBRANE	-0.133334	-0.043258	-8.70339	4.33307e-17	1.78395e-16	27.872
GOBP_PYRIMIDINE_NUCLEOBASE_METABOLIC_PROCESS	-0.190756	-0.040073	-8.70209	4.37653e-17	1.80042e-16	27.8622
GOBP_REGULATION_OF_SMALL_GTPASE_MEDIATED_SIGNAL_TRANSDUCTION	-0.147219	-0.036135	-8.69317	4.68697e-17	1.92662e-16	27.7947
GOBP_CELLULAR_RESPONSE_TO_TESTOSTERONE_STIMULUS	-0.23483	-0.0387667	-8.69218	4.7229e-17	1.93987e-16	27.7872
GOBP_RESPONSE_TO_LEAD_ION	-0.202457	-0.0285737	-8.69022	4.79441e-17	1.9677e-16	27.7724
GOBP_PROTEIN_POLY_ADP_RIBOSYLATION	-0.260653	-0.0341622	-8.68855	4.85643e-17	1.99159e-16	27.7597
GOBP_KINETOCHORE_ASSEMBLY	-0.291915	-0.059022	-8.68547	4.97254e-17	2.03762e-16	27.7364
GOBP_LENS_MORPHOGENESIS_IN_CAMERA_TYPE_EYE	-0.186829	-0.0389529	-8.68372	5.03989e-17	2.0636e-16	27.7232
GOBP_NEGATIVE_REGULATION_OF_CARBOHYDRATE_METABOLIC_PROCESS	-0.110917	-0.0380262	-8.68322	5.05918e-17	2.06988e-16	27.7194
GOBP_REGULATION_OF_INTRINSIC_APOPTOTIC_SIGNALING_PATHWAY_BY_P53_CLASS_MEDIATOR	-0.183026	-0.0385211	-8.66844	5.66651e-17	2.31655e-16	27.6078
GOBP_MODULATION_BY_HOST_OF_SYMBIONT_PROCESS	-0.157633	-0.0317641	-8.66714	5.72343e-17	2.338e-16	27.5979
GOBP_RRNA_CATABOLIC_PROCESS	-0.225778	-0.0487701	-8.66649	5.75184e-17	2.34777e-16	27.593
GOBP_NEGATIVE_REGULATION_OF_HISTONE_ACETYLATION	-0.188238	-0.0460876	-8.65181	6.43629e-17	2.6251e-16	27.4823
GOBP_POSITIVE_REGULATION_OF_TORC1_SIGNALING	-0.226291	-0.0385099	-8.65082	6.48551e-17	2.64312e-16	27.4748
GOBP_SPLEEN_DEVELOPMENT	-0.188624	-0.00771736	-8.64929	6.56172e-17	2.6721e-16	27.4633
GOBP_PURINE_NUCLEOBASE_METABOLIC_PROCESS	-0.173061	-0.0210611	-8.64829	6.61219e-17	2.69056e-16	27.4557
GOBP_COLUMNAR_CUBOIDAL_EPITHELIAL_CELL_DIFFERENTIATION	-0.107678	-0.0145604	-8.64807	6.62352e-17	2.69155e-16	27.454
GOBP_STEM_CELL_DIVISION	-0.154375	-0.0364937	-8.64804	6.62489e-17	2.69155e-16	27.4538
GOBP_CELLULAR_RESPONSE_TO_VIRUS	-0.197207	-0.0364147	-8.63896	7.10135e-17	2.8829e-16	27.3854
GOBP_UNSATURATED_FATTY_ACID_METABOLIC_PROCESS	0.117999	-0.0209631	8.63614	7.25627e-17	2.94351e-16	27.3642
GOBP_TAIL_ANCHORED_MEMBRANE_PROTEIN_INSERTION_INTO_ER_MEMBRANE	-0.25581	-0.0471787	-8.63389	7.38239e-17	2.99235e-16	27.3472
GOBP_RNA_SPLICING_VIA_ENDONUCLEOLYTIC_CLEAVAGE_AND_LIGATION	-0.298811	-0.037083	-8.63113	7.53955e-17	3.05369e-16	27.3265
GOBP_NEGATIVE_REGULATION_OF_HISTONE_H3_K9_METHYLATION	-0.267576	-0.0381891	-8.62232	8.0647e-17	3.26387e-16	27.2601
GOBP_NEGATIVE_REGULATION_OF_CENTROSOME_DUPLICATION	-0.242723	-0.0363454	-8.62134	8.12508e-17	3.28577e-16	27.2528
GOBP_SNRNA_PROCESSING	-0.23054	-0.0221922	-8.6209	8.15244e-17	3.29429e-16	27.2495
GOBP_HISTONE_H4_K5_ACETYLATION	-0.296938	-0.0293886	-8.62063	8.16936e-17	3.29858e-16	27.2474
GOBP_GAS_TRANSPORT	0.249229	0.00624762	8.61612	8.45547e-17	3.41148e-16	27.2135
GOBP_NEGATIVE_REGULATION_OF_NEUROTRANSMITTER_SECRETION	-0.249962	-0.0304519	-8.61521	8.51407e-17	3.43248e-16	27.2067
GOBP_HEPARAN_SULFATE_PROTEOGLYCAN_METABOLIC_PROCESS	-0.193191	-0.0418481	-8.59442	9.97671e-17	4.01906e-16	27.0506
GOBP_REGULATION_OF_CELLULAR_COMPONENT_SIZE	-0.122685	-0.0384927	-8.59285	1.00967e-16	4.06429e-16	27.0388
GOBP_REGULATION_OF_GENE_EXPRESSION_BY_GENOMIC_IMPRINTING	-0.202861	-0.0294377	-8.58905	1.03931e-16	4.18037e-16	27.0103
GOBP_CERAMIDE_CATABOLIC_PROCESS	-0.185967	-0.0391322	-8.58459	1.07523e-16	4.32154e-16	26.9769
GOBP_PROTEIN_INSERTION_INTO_MITOCHONDRIAL_INNER_MEMBRANE	-0.281887	-0.0540575	-8.58341	1.08492e-16	4.35713e-16	26.968
GOBP_NEGATIVE_REGULATION_OF_CYTOSKELETON_ORGANIZATION	-0.1279	-0.0390233	-8.58291	1.08908e-16	4.37049e-16	26.9643
GOBP_REGULATION_OF_HISTONE_PHOSPHORYLATION	-0.199572	-0.0442805	-8.58229	1.09426e-16	4.38793e-16	26.9596
GOBP_POSITIVE_REGULATION_BY_HOST_OF_VIRAL_PROCESS	-0.210047	-0.0414319	-8.58218	1.09516e-16	4.38817e-16	26.9588
GOBP_POSITIVE_REGULATION_OF_NOTCH_SIGNALING_PATHWAY	-0.126717	-0.0325454	-8.57614	1.14661e-16	4.59083e-16	26.9136
GOBP_POLY_A_PLUS_MRNA_EXPORT_FROM_NUCLEUS	-0.243976	-0.0297457	-8.56485	1.24941e-16	4.99859e-16	26.829
GOBP_NUCLEOLAR_LARGE_RRNA_TRANSCRIPTION_BY_RNA_POLYMERASE_I	-0.282444	-0.0358547	-8.56002	1.29618e-16	5.18176e-16	26.7928
GOBP_AXONAL_TRANSPORT_OF_MITOCHONDRION	-0.226153	-0.0378551	-8.55849	1.31126e-16	5.23804e-16	26.7815
GOBP_POSITIVE_REGULATION_OF_CELL_FATE_COMMITMENT	0.216505	0.0139861	8.54966	1.40219e-16	5.59699e-16	26.7154
GOBP_PURINE_CONTAINING_COMPOUND_METABOLIC_PROCESS	-0.101066	-0.0351669	-8.54105	1.49684e-16	5.97027e-16	26.6511
GOBP_PROTEIN_LOCALIZATION_TO_CELL_PERIPHERY	-0.12791	-0.0420731	-8.54084	1.4992e-16	5.97514e-16	26.6496
GOBP_REGULATION_OF_DNA_DIRECTED_DNA_POLYMERASE_ACTIVITY	-0.317195	-0.0493387	-8.54009	1.50781e-16	6.00489e-16	26.6439
GOBP_BENZENE_CONTAINING_COMPOUND_METABOLIC_PROCESS	0.190632	-0.0126027	8.53486	1.56876e-16	6.24287e-16	26.6049
GOBP_REGULATION_OF_SYNAPTIC_VESICLE_ENDOCYTOSIS	-0.254636	-0.0279993	-8.53084	1.61727e-16	6.43105e-16	26.5749
GOBP_REGULATION_OF_HISTONE_H3_K9_TRIMETHYLATION	-0.22586	-0.0404535	-8.52507	1.68953e-16	6.7133e-16	26.5319
GOBP_TRNA_CATABOLIC_PROCESS	-0.272294	-0.0372029	-8.51676	1.7993e-16	7.14403e-16	26.4699
GOBP_MEIOTIC_CELL_CYCLE_PROCESS	-0.13692	-0.0377798	-8.51045	1.88729e-16	7.48205e-16	26.4229
GOBP_REGULATION_OF_ERBB_SIGNALING_PATHWAY	-0.134692	-0.0392992	-8.50749	1.92997e-16	7.64549e-16	26.4009
GOBP_VIRAL_BUDDING	-0.233225	-0.0417591	-8.50276	2.0003e-16	7.91811e-16	26.3656
GOBP_NUCLEOSIDE_PHOSPHATE_BIOSYNTHETIC_PROCESS	-0.104111	-0.0402951	-8.49921	2.05472e-16	8.12738e-16	26.3392
GOBP_REGULATION_OF_MULTICELLULAR_ORGANISM_GROWTH	-0.134812	-0.0215026	-8.47924	2.38906e-16	9.44275e-16	26.1908
GOBP_POSITIVE_REGULATION_OF_NEURON_MIGRATION	-0.219502	-0.0303636	-8.47827	2.40667e-16	9.50516e-16	26.1836
GOBP_MATURATION_OF_SSU_RRNA	-0.282383	-0.0304303	-8.47516	2.46384e-16	9.72362e-16	26.1604
GOBP_CARDIAC_SEPTUM_DEVELOPMENT	-0.133873	-0.0211077	-8.47431	2.47955e-16	9.77828e-16	26.1542
GOBP_PRIMARY_ALCOHOL_CATABOLIC_PROCESS	0.197633	-0.00818123	8.46898	2.58125e-16	1.01717e-15	26.1146
GOBP_ENDODERMAL_CELL_FATE_COMMITMENT	-0.179787	-0.0399704	-8.46741	2.61209e-16	1.02855e-15	26.1029
GOBP_NEGATIVE_REGULATION_OF_HISTONE_METHYLATION	-0.260483	-0.0326831	-8.46646	2.63071e-16	1.0351e-15	26.0959
GOBP_NOSE_DEVELOPMENT	-0.219228	-0.0181947	-8.46429	2.67419e-16	1.05142e-15	26.0798
GOBP_ORGANISM_EMERGENCE_FROM_PROTECTIVE_STRUCTURE	-0.133274	-0.0323041	-8.46304	2.69944e-16	1.06055e-15	26.0705
GOBP_LONG_CHAIN_FATTY_ACID_BIOSYNTHETIC_PROCESS	0.145738	-0.019762	8.4564	2.83776e-16	1.11406e-15	26.0213
GOBP_METENCEPHALON_DEVELOPMENT	-0.139841	-0.0287129	-8.45458	2.877e-16	1.12862e-15	26.0078
GOBP_LAMELLIPODIUM_ASSEMBLY	-0.187567	-0.0317434	-8.45145	2.94551e-16	1.15463e-15	25.9847
GOBP_REGULATION_OF_ESTABLISHMENT_OR_MAINTENANCE_OF_CELL_POLARITY	-0.204395	-0.0410524	-8.44632	3.06144e-16	1.19918e-15	25.9467
GOBP_POSITIVE_REGULATION_OF_PROTEIN_KINASE_A_SIGNALING	0.180708	-0.0370663	8.43781	3.26391e-16	1.27753e-15	25.8836
GOBP_PYRIMIDINE_RIBONUCLEOSIDE_TRIPHOSPHATE_METABOLIC_PROCESS	-0.20823	-0.0513864	-8.43389	3.36133e-16	1.31468e-15	25.8547
GOBP_NK_T_CELL_DIFFERENTIATION	-0.234493	-0.0329886	-8.43019	3.4561e-16	1.34973e-15	25.8273
GOBP_CELLULAR_RESPONSE_TO_INTERFERON_ALPHA	-0.266879	-0.0347925	-8.42751	3.52652e-16	1.37621e-15	25.8075
GOBP_REPLICATIVE_SENESCENCE	-0.196195	-0.0346123	-8.42614	3.56286e-16	1.38936e-15	25.7974
GOBP_PHOSPHOLIPID_TRANSPORT	-0.116084	-0.0402277	-8.42053	3.71612e-16	1.44804e-15	25.7559
GOBP_EYE_MORPHOGENESIS	-0.100512	-0.0239304	-8.41864	3.76939e-16	1.46771e-15	25.7419
GOBP_REGULATION_OF_TRANSCRIPTION_FROM_RNA_POLYMERASE_II_PROMOTER_IN_RESPONSE_TO_OXIDATIVE_STRESS	-0.223504	-0.0444032	-8.40296	4.23977e-16	1.64964e-15	25.6261
GOBP_PEPTIDYL_SERINE_DEPHOSPHORYLATION	-0.222599	-0.0468238	-8.39964	4.34647e-16	1.6899e-15	25.6017
GOBP_NUCLEOLUS_ORGANIZATION	-0.292219	-0.0285902	-8.39735	4.42169e-16	1.71787e-15	25.5848
GOBP_POSITIVE_REGULATION_OF_PROTEIN_CONTAINING_COMPLEX_DISASSEMBLY	-0.150644	-0.0372856	-8.39603	4.46559e-16	1.73364e-15	25.5751
GOBP_HIGH_DENSITY_LIPOPROTEIN_PARTICLE_REMODELING	0.207045	-0.0084609	8.39502	4.49955e-16	1.74553e-15	25.5676
GOBP_MICROTUBULE_SEVERING	-0.206542	-0.0495169	-8.3921	4.59885e-16	1.78274e-15	25.5461
GOBP_PEPTIDYL_LYSINE_DIMETHYLATION	-0.233891	-0.024598	-8.39184	4.60782e-16	1.78489e-15	25.5442
GOBP_REGULATION_OF_RESPIRATORY_GASEOUS_EXCHANGE	-0.163765	-0.0215404	-8.39032	4.66056e-16	1.80399e-15	25.533
GOBP_POSITIVE_REGULATION_OF_DEPHOSPHORYLATION	-0.164047	-0.0399193	-8.3901	4.66841e-16	1.80569e-15	25.5314
GOBP_REGULATION_OF_PROTEIN_DEPOLYMERIZATION	-0.148356	-0.0360991	-8.3895	4.68939e-16	1.81247e-15	25.5269
GOBP_NEGATIVE_REGULATION_OF_ORGAN_GROWTH	-0.113413	-0.0184868	-8.38939	4.69314e-16	1.81258e-15	25.5262
GOBP_EPIGENETIC_MAINTENANCE_OF_CHROMATIN_IN_TRANSCRIPTION_COMPETENT_CONFORMATION	-0.219182	-0.0367261	-8.38801	4.74187e-16	1.83005e-15	25.516
GOBP_POSITIVE_REGULATION_OF_BLOOD_VESSEL_ENDOTHELIAL_CELL_PROLIFERATION_INVOLVED_IN_SPROUTING_ANGIOGENESIS	0.187722	0.00495804	8.38303	4.9222e-16	1.89825e-15	25.4793
GOBP_TRANSMEMBRANE_RECEPTOR_PROTEIN_SERINE_THREONINE_KINASE_SIGNALING_PATHWAY	-0.101193	-0.0239849	-8.37993	5.03731e-16	1.94122e-15	25.4565
GOBP_PIGMENT_CELL_DIFFERENTIATION	-0.167171	-0.0282729	-8.37458	5.24301e-16	2.019e-15	25.4171
GOBP_DNA_INTEGRATION	-0.267843	-0.0356662	-8.37381	5.27323e-16	2.02915e-15	25.4115
GOBP_CYTOPLASMIC_PATTERN_RECOGNITION_RECEPTOR_SIGNALING_PATHWAY	-0.207343	-0.0369409	-8.37007	5.42268e-16	2.08485e-15	25.384
GOBP_CELLULAR_RESPONSE_TO_PROSTAGLANDIN_STIMULUS	-0.170379	-0.0307485	-8.36999	5.42594e-16	2.08485e-15	25.3834
GOBP_REGULATION_OF_DENDRITE_DEVELOPMENT	-0.188995	-0.0398847	-8.36926	5.45595e-16	2.09484e-15	25.3779
GOBP_NADPH_REGENERATION	-0.212692	-0.0494467	-8.36747	5.52938e-16	2.12148e-15	25.3648
GOBP_REGULATION_OF_MUSCLE_ADAPTATION	-0.102475	-0.0299286	-8.36146	5.78293e-16	2.21714e-15	25.3207
GOBP_FACE_DEVELOPMENT	-0.13497	-0.0263445	-8.35917	5.88285e-16	2.2538e-15	25.3038
GOBP_REGULATION_OF_RESPONSE_TO_OXIDATIVE_STRESS	-0.141897	-0.0343593	-8.3523	6.19239e-16	2.37066e-15	25.2533
GOBP_HINDBRAIN_MORPHOGENESIS	-0.167308	-0.0306156	-8.34983	6.30762e-16	2.41301e-15	25.2352
GOBP_REGULATION_OF_HISTONE_DEACETYLATION	-0.178522	-0.0369099	-8.3445	6.56335e-16	2.50901e-15	25.1961
GOBP_TUBE_FORMATION	-0.127661	-0.033459	-8.32945	7.34223e-16	2.80471e-15	25.0857
GOBP_FORMATION_OF_QUADRUPLE_SL_U4_U5_U6_SNRNP	0.261225	-0.0300878	8.32562	7.55426e-16	2.8836e-15	25.0577
GOBP_PLATELET_DERIVED_GROWTH_FACTOR_RECEPTOR_BETA_SIGNALING_PATHWAY	-0.210566	-0.0404974	-8.31665	8.07599e-16	3.08051e-15	24.992
GOBP_DNA_DEALKYLATION	-0.185797	-0.0296702	-8.3126	8.32303e-16	3.16783e-15	24.9623
GOBP_REGULATION_OF_ESTABLISHMENT_OF_PLANAR_POLARITY	-0.152113	-0.0293903	-8.30587	8.74993e-16	3.32789e-15	24.9131
GOBP_VIRAL_LIFE_CYCLE	-0.155625	-0.0344288	-8.2899	9.85151e-16	3.74415e-15	24.7964
GOBP_HIPPOCAMPUS_DEVELOPMENT	-0.156693	-0.0281776	-8.28672	1.00867e-15	3.83077e-15	24.7732
GOBP_REGULATION_OF_RNA_POLYMERASE_II_REGULATORY_REGION_SEQUENCE_SPECIFIC_DNA_BINDING	-0.184686	-0.0358781	-8.28514	1.02056e-15	3.87311e-15	24.7617
GOBP_PROGESTERONE_METABOLIC_PROCESS	0.173055	-0.0141084	8.28375	1.03109e-15	3.91024e-15	24.7516
GOBP_REGULATION_OF_APPETITE	0.162584	-0.00389285	8.28023	1.05835e-15	4.01073e-15	24.7259
GOBP_CELLULAR_RESPONSE_TO_REACTIVE_OXYGEN_SPECIES	-0.10585	-0.0353131	-8.2799	1.06094e-15	4.01764e-15	24.7235
GOBP_DENDRITIC_SPINE_DEVELOPMENT	-0.197097	-0.0388931	-8.27816	1.07477e-15	4.06704e-15	24.7108
GOBP_NEURAL_TUBE_PATTERNING	-0.154365	-0.0305269	-8.27024	1.13969e-15	4.3096e-15	24.6531
GOBP_NEGATIVE_REGULATION_OF_OXIDATIVE_STRESS_INDUCED_INTRINSIC_APOPTOTIC_SIGNALING_PATHWAY	-0.173826	-0.0409958	-8.26804	1.15842e-15	4.37726e-15	24.637
GOBP_ROOF_OF_MOUTH_DEVELOPMENT	-0.106866	-0.0182199	-8.25273	1.2974e-15	4.89889e-15	24.5256
GOBP_REGULATION_OF_TYPE_I_INTERFERON_MEDIATED_SIGNALING_PATHWAY	-0.213191	-0.0436011	-8.25172	1.30716e-15	4.92865e-15	24.5182
GOBP_C21_STEROID_HORMONE_METABOLIC_PROCESS	0.129967	0.00240059	8.24602	1.36341e-15	5.13705e-15	24.4767
GOBP_CELLULAR_RESPONSE_TO_ACID_CHEMICAL	-0.113893	-0.0294636	-8.23828	1.44364e-15	5.43542e-15	24.4205
GOBP_REGULATION_OF_GOLGI_ORGANIZATION	-0.22751	-0.0272543	-8.23721	1.45508e-15	5.47456e-15	24.4127
GOBP_CELL_MIGRATION_IN_HINDBRAIN	-0.193072	-0.0314122	-8.23478	1.48147e-15	5.56988e-15	24.395
GOBP_CORONARY_VASCULATURE_DEVELOPMENT	-0.158051	-0.0202772	-8.23436	1.48601e-15	5.58293e-15	24.392
GOBP_MEMBRANE_LIPID_BIOSYNTHETIC_PROCESS	-0.136119	-0.0454319	-8.23159	1.51679e-15	5.69447e-15	24.3719
GOBP_HEPARIN_BIOSYNTHETIC_PROCESS	-0.227897	-0.0425956	-8.22423	1.60141e-15	6.00786e-15	24.3185
GOBP_MORPHOGENESIS_OF_A_POLARIZED_EPITHELIUM	-0.127139	-0.0334718	-8.21903	1.66398e-15	6.23813e-15	24.2808
GOBP_NADP_METABOLIC_PROCESS	-0.152379	-0.0462134	-8.21847	1.67088e-15	6.25954e-15	24.2767
GOBP_REGULATION_OF_GLUCOSE_IMPORT	-0.12043	-0.0220149	-8.21365	1.73133e-15	6.48137e-15	24.2417
GOBP_LYSOSOMAL_PROTEIN_CATABOLIC_PROCESS	-0.216097	-0.0397087	-8.21353	1.73279e-15	6.48221e-15	24.2409
GOBP_ENDODERMAL_CELL_DIFFERENTIATION	-0.165405	-0.0381849	-8.2105	1.77196e-15	6.624e-15	24.2189
GOBP_MITOCHONDRIAL_FRAGMENTATION_INVOLVED_IN_APOPTOTIC_PROCESS	-0.211822	-0.0416901	-8.20928	1.78802e-15	6.67925e-15	24.21
GOBP_REGULATION_OF_TETRAPYRROLE_METABOLIC_PROCESS	-0.22436	-0.0367651	-8.20631	1.82746e-15	6.81739e-15	24.1886
GOBP_GLYCEROLIPID_METABOLIC_PROCESS	-0.10488	-0.0352534	-8.2063	1.8276e-15	6.81739e-15	24.1885
GOBP_PROTEIN_MATURATION	-0.111495	-0.035966	-8.20619	1.8291e-15	6.81813e-15	24.1877
GOBP_INTRACILIARY_TRANSPORT	-0.230741	-0.0413653	-8.20495	1.84588e-15	6.87579e-15	24.1787
GOBP_REGULATION_OF_CELL_MATRIX_ADHESION	-0.140102	-0.0328823	-8.20291	1.87388e-15	6.97515e-15	24.1639
GOBP_ENDOCRINE_PANCREAS_DEVELOPMENT	-0.120744	-0.0122175	-8.19314	2.01358e-15	7.48984e-15	24.0932
GOBP_NEGATIVE_REGULATION_OF_SIGNALING_RECEPTOR_ACTIVITY	0.120802	-0.0194948	8.18454	2.14501e-15	7.97305e-15	24.031
GOBP_POSITIVE_REGULATION_OF_PROTEIN_CONTAINING_COMPLEX_ASSEMBLY	-0.122272	-0.0338222	-8.17625	2.27972e-15	8.46776e-15	23.9711
GOBP_NEGATIVE_REGULATION_OF_PROTEIN_SERINE_THREONINE_KINASE_ACTIVITY	-0.126454	-0.0432361	-8.17525	2.29643e-15	8.5238e-15	23.9639
GOBP_PLATELET_DERIVED_GROWTH_FACTOR_RECEPTOR_SIGNALING_PATHWAY	-0.13665	-0.0371275	-8.17434	2.31184e-15	8.57492e-15	23.9573
GOBP_POSITIVE_REGULATION_OF_PROTEIN_IMPORT	-0.184692	-0.0381659	-8.17392	2.31908e-15	8.59568e-15	23.9542
GOBP_REGULATION_OF_MUSCLE_HYPERTROPHY	-0.137771	-0.0258717	-8.1644	2.48683e-15	9.21095e-15	23.8856
GOBP_S_ADENOSYLMETHIONINE_METABOLIC_PROCESS	-0.187053	-0.0329417	-8.15863	2.59439e-15	9.59769e-15	23.8439
GOBP_NEGATIVE_REGULATION_OF_SMOOTHENED_SIGNALING_PATHWAY	-0.156678	-0.0347985	-8.1586	2.59491e-15	9.59769e-15	23.8437
GOBP_POSITIVE_REGULATION_OF_NEURON_APOPTOTIC_PROCESS	-0.124787	-0.0334295	-8.1572	2.6217e-15	9.68995e-15	23.8336
GOBP_CARTILAGE_DEVELOPMENT_INVOLVED_IN_ENDOCHONDRAL_BONE_MORPHOGENESIS	-0.152388	-0.0268447	-8.13875	3.00107e-15	1.10843e-14	23.7007
GOBP_ACID_SECRETION	0.11963	-0.00446975	8.12907	3.22148e-15	1.189e-14	23.631
GOBP_HISTONE_ARGININE_METHYLATION	-0.207002	-0.0395829	-8.12532	3.31084e-15	1.22112e-14	23.6041
GOBP_NEGATIVE_REGULATION_OF_NUCLEOCYTOPLASMIC_TRANSPORT	-0.172599	-0.0417996	-8.11872	3.4746e-15	1.28062e-14	23.5566
GOBP_POSITIVE_REGULATION_OF_PEPTIDYL_THREONINE_PHOSPHORYLATION	-0.138084	-0.036174	-8.11847	3.48085e-15	1.28202e-14	23.5549
GOBP_DEVELOPMENTAL_PIGMENTATION	-0.148602	-0.0298612	-8.11492	3.57229e-15	1.31406e-14	23.5294
GOBP_LOCOMOTOR_RHYTHM	-0.190394	-0.0262546	-8.1149	3.57285e-15	1.31406e-14	23.5292
GOBP_CELLULAR_RESPONSE_TO_PEPTIDE	-0.106487	-0.0264988	-8.10466	3.85033e-15	1.41512e-14	23.4557
GOBP_POSITIVE_REGULATION_OF_DENDRITE_DEVELOPMENT	-0.198216	-0.0306924	-8.09674	4.0792e-15	1.49818e-14	23.3989
GOBP_AGGREPHAGY	-0.253141	-0.0240621	-8.09019	4.27877e-15	1.57038e-14	23.3519
GOBP_HIGH_DENSITY_LIPOPROTEIN_PARTICLE_CLEARANCE	0.173163	-0.0048985	8.08539	4.43082e-15	1.62505e-14	23.3176
GOBP_HEAD_MORPHOGENESIS	-0.137222	-0.0255572	-8.07973	4.61736e-15	1.69228e-14	23.277
GOBP_ENDOTHELIAL_CELL_ACTIVATION	-0.220043	-0.0304036	-8.07506	4.77699e-15	1.74956e-14	23.2436
GOBP_MATURATION_OF_LSU_RRNA_FROM_TRICISTRONIC_RRNA_TRANSCRIPT_SSU_RRNA_5_8S_RRNA_LSU_RRNA	-0.297168	-0.0388286	-8.07	4.95622e-15	1.81394e-14	23.2074
GOBP_RIBONUCLEOSIDE_MONOPHOSPHATE_METABOLIC_PROCESS	-0.124721	-0.0384648	-8.06586	5.10754e-15	1.86801e-14	23.1778
GOBP_REGULATION_OF_HYDROGEN_PEROXIDE_METABOLIC_PROCESS	0.150745	-0.0123006	8.06479	5.14753e-15	1.88132e-14	23.1702
GOBP_RNA_5_END_PROCESSING	-0.242328	-0.043697	-8.05723	5.43806e-15	1.98612e-14	23.1162
GOBP_NEGATIVE_REGULATION_OF_OXIDATIVE_STRESS_INDUCED_NEURON_DEATH	-0.159834	-0.0331852	-8.05261	5.62388e-15	2.05256e-14	23.0831
GOBP_CLEAVAGE_INVOLVED_IN_RRNA_PROCESSING	-0.277982	-0.0342097	-8.05221	5.64038e-15	2.05715e-14	23.0803
GOBP_PEPTIDYL_ARGININE_MODIFICATION	-0.12924	-0.0336323	-8.04841	5.79796e-15	2.11315e-14	23.0532
GOBP_TRANSCRIPTION_INITIATION_FROM_RNA_POLYMERASE_I_PROMOTER	-0.243961	-0.035334	-8.04479	5.95219e-15	2.16785e-14	23.0274
GOBP_CHONDROCYTE_DIFFERENTIATION_INVOLVED_IN_ENDOCHONDRAL_BONE_MORPHOGENESIS	-0.154351	-0.0453651	-8.04205	6.07163e-15	2.20982e-14	23.0078
GOBP_MAGNESIUM_ION_TRANSPORT	-0.241924	-0.0444158	-8.03866	6.22296e-15	2.26333e-14	22.9836
GOBP_POSITIVE_REGULATION_OF_MITOCHONDRION_ORGANIZATION	-0.131654	-0.0421865	-8.02636	6.80333e-15	2.4727e-14	22.896
GOBP_PROTON_TRANSPORTING_TWO_SECTOR_ATPASE_COMPLEX_ASSEMBLY	-0.214151	-0.0467981	-8.02055	7.09536e-15	2.57705e-14	22.8547
GOBP_LYSOSOMAL_LUMEN_ACIDIFICATION	-0.283446	-0.0420057	-8.01682	7.28978e-15	2.64583e-14	22.8281
GOBP_PROTEIN_INSERTION_INTO_ER_MEMBRANE_BY_STOP_TRANSFER_MEMBRANE_ANCHOR_SEQUENCE	-0.253387	-0.0538498	-8.00411	7.9916e-15	2.89756e-14	22.7377
GOBP_RESPONSE_TO_NITROSATIVE_STRESS	-0.215249	-0.0377518	-8.00406	7.9944e-15	2.89756e-14	22.7374
GOBP_NUCLEOSIDE_BISPHOSPHATE_METABOLIC_PROCESS	-0.124317	-0.0346349	-8.00256	8.08181e-15	2.92721e-14	22.7267
GOBP_REGULATION_OF_PEPTIDYL_SERINE_PHOSPHORYLATION	-0.103643	-0.0238429	-7.99942	8.2675e-15	2.9924e-14	22.7044
GOBP_PROTEIN_IMPORT_INTO_PEROXISOME_MATRIX	-0.21591	-0.0373184	-7.99885	8.30131e-15	3.00257e-14	22.7004
GOBP_CELLULAR_RESPONSE_TO_GAMMA_RADIATION	-0.193738	-0.0484891	-7.99077	8.80007e-15	3.18077e-14	22.643
GOBP_GASTRULATION_WITH_MOUTH_FORMING_SECOND	-0.181257	-0.0200309	-7.98109	9.43669e-15	3.40852e-14	22.5744
GOBP_AXONAL_TRANSPORT	-0.201329	-0.0398155	-7.96929	1.02746e-14	3.70861e-14	22.4907
GOBP_PROTEIN_IMPORT_INTO_MITOCHONDRIAL_MATRIX	-0.220242	-0.0521293	-7.96766	1.0396e-14	3.74987e-14	22.4792
GOBP_POSITIVE_REGULATION_OF_ISOTYPE_SWITCHING_TO_IGG_ISOTYPES	-0.233196	-0.0396056	-7.96728	1.04245e-14	3.75756e-14	22.4765
GOBP_VENTRICULAR_CARDIAC_MUSCLE_CELL_DEVELOPMENT	-0.191222	-0.0139546	-7.96507	1.05921e-14	3.81534e-14	22.4608
GOBP_RESPONSE_TO_INTERLEUKIN_17	-0.203846	-0.0339927	-7.9616	1.08599e-14	3.9091e-14	22.4363
GOBP_CHAPERONE_MEDIATED_PROTEIN_COMPLEX_ASSEMBLY	-0.2128	-0.0381355	-7.95161	1.16696e-14	4.19768e-14	22.3656
GOBP_REGULATION_OF_LAMELLIPODIUM_ORGANIZATION	-0.181161	-0.0329471	-7.9412	1.25762e-14	4.52069e-14	22.2921
GOBP_REGULATION_OF_PROTEIN_DEUBIQUITINATION	-0.237646	-0.0447008	-7.93896	1.2781e-14	4.59116e-14	22.2762
GOBP_URETER_DEVELOPMENT	0.180398	-0.00699814	7.93654	1.30047e-14	4.66832e-14	22.2592
GOBP_PYRIMIDINE_CONTAINING_COMPOUND_BIOSYNTHETIC_PROCESS	-0.155866	-0.0529338	-7.9313	1.35031e-14	4.84394e-14	22.2222
GOBP_REGULATION_OF_VIRAL_GENOME_REPLICATION	-0.182721	-0.0367919	-7.92864	1.37636e-14	4.934e-14	22.2034
GOBP_REGULATION_OF_LIPOPROTEIN_PARTICLE_CLEARANCE	0.12742	-0.000210774	7.9271	1.39162e-14	4.98528e-14	22.1926
GOBP_POSITIVE_REGULATION_OF_DENDRITIC_SPINE_DEVELOPMENT	-0.220735	-0.0361955	-7.91673	1.49908e-14	5.36657e-14	22.1195
GOBP_EMBRYONIC_HEMOPOIESIS	-0.16499	-0.0304316	-7.91202	1.55065e-14	5.54683e-14	22.0863
GOBP_NEURON_MIGRATION	-0.144327	-0.0241633	-7.91194	1.55155e-14	5.54683e-14	22.0857
GOBP_PROTOPORPHYRINOGEN_IX_METABOLIC_PROCESS	-0.184835	-0.0404381	-7.91128	1.55883e-14	5.56908e-14	22.0811
GOBP_MATURATION_OF_SSU_RRNA_FROM_TRICISTRONIC_RRNA_TRANSCRIPT_SSU_RRNA_5_8S_RRNA_LSU_RRNA	-0.262515	-0.0340357	-7.9053	1.62703e-14	5.80876e-14	22.039
GOBP_NEGATIVE_REGULATION_OF_DNA_TEMPLATED_TRANSCRIPTION_ELONGATION	-0.271409	-0.0314754	-7.90456	1.63573e-14	5.83584e-14	22.0338
GOBP_REGULATION_OF_RESPIRATORY_SYSTEM_PROCESS	-0.169773	-0.0236533	-7.90258	1.65907e-14	5.9151e-14	22.0198
GOBP_CENTRAL_NERVOUS_SYSTEM_PROJECTION_NEURON_AXONOGENESIS	-0.19651	-0.0349968	-7.90148	1.67216e-14	5.95769e-14	22.0121
GOBP_MATURATION_OF_5_8S_RRNA_FROM_TRICISTRONIC_RRNA_TRANSCRIPT_SSU_RRNA_5_8S_RRNA_LSU_RRNA	-0.267206	-0.0368367	-7.90049	1.68415e-14	5.99634e-14	22.0051
GOBP_REGULATION_OF_ANOIKIS	-0.163725	-0.0364069	-7.88975	1.81854e-14	6.46166e-14	21.9297
GOBP_MEMBRANE_DISASSEMBLY	-0.184437	-0.038338	-7.88778	1.84444e-14	6.54925e-14	21.9158
GOBP_REGULATION_OF_TRANSCRIPTION_OF_NUCLEOLAR_LARGE_RRNA_BY_RNA_POLYMERASE_I	-0.267111	-0.0333522	-7.88611	1.8665e-14	6.62311e-14	21.9041
GOBP_REGULATION_OF_PROTEIN_NEDDYLATION	-0.20012	-0.0443621	-7.88557	1.87373e-14	6.64426e-14	21.9003
GOBP_CRANIAL_SKELETAL_SYSTEM_DEVELOPMENT	-0.162818	-0.0207487	-7.88171	1.92613e-14	6.82544e-14	21.8732
GOBP_REGULATION_OF_SUPRAMOLECULAR_FIBER_ORGANIZATION	-0.112448	-0.0400409	-7.88033	1.94525e-14	6.88855e-14	21.8635
GOBP_PURINE_CONTAINING_COMPOUND_BIOSYNTHETIC_PROCESS	-0.101682	-0.0393209	-7.8739	2.03663e-14	7.20729e-14	21.8184
GOBP_HYDROGEN_PEROXIDE_BIOSYNTHETIC_PROCESS	0.16637	-0.0161971	7.87363	2.04065e-14	7.21663e-14	21.8164
GOBP_OXIDATIVE_DEMETHYLATION	-0.201498	-0.029201	-7.87323	2.04641e-14	7.23214e-14	21.8137
GOBP_NADH_METABOLIC_PROCESS	-0.167091	-0.0428583	-7.87051	2.08662e-14	7.36925e-14	21.7946
GOBP_NEGATIVE_REGULATION_OF_PRODUCTION_OF_MIRNAS_INVOLVED_IN_GENE_SILENCING_BY_MIRNA	-0.196399	-0.0376659	-7.86691	2.14088e-14	7.5558e-14	21.7693
GOBP_LAMELLIPODIUM_ORGANIZATION	-0.165691	-0.033492	-7.84047	2.58471e-14	9.11606e-14	21.5842
GOBP_CORONARY_VASCULATURE_MORPHOGENESIS	-0.191031	-0.00997459	-7.83757	2.63868e-14	9.30014e-14	21.5639
GOBP_EPITHELIAL_TO_MESENCHYMAL_TRANSITION	-0.120946	-0.0283153	-7.8366	2.65686e-14	9.35793e-14	21.5572
GOBP_POSITIVE_REGULATION_OF_MEIOTIC_NUCLEAR_DIVISION	0.162753	-0.0121668	7.83318	2.72233e-14	9.58208e-14	21.5333
GOBP_PYRIMIDINE_NUCLEOSIDE_TRIPHOSPHATE_METABOLIC_PROCESS	-0.195637	-0.0513966	-7.82671	2.85058e-14	1.00268e-13	21.4881
GOBP_MEMBRANE_LIPID_METABOLIC_PROCESS	-0.125383	-0.0405522	-7.82442	2.89722e-14	1.0184e-13	21.4721
GOBP_ESTABLISHMENT_OR_MAINTENANCE_OF_BIPOLAR_CELL_POLARITY	-0.115698	-0.0398243	-7.82279	2.93107e-14	1.02961e-13	21.4607
GOBP_GROWTH_PLATE_CARTILAGE_DEVELOPMENT	-0.175083	-0.0372164	-7.81909	3.00911e-14	1.05631e-13	21.4349
GOBP_METHIONINE_BIOSYNTHETIC_PROCESS	-0.195469	-0.0328102	-7.81475	3.10331e-14	1.08865e-13	21.4046
GOBP_NEGATIVE_REGULATION_OF_COLD_INDUCED_THERMOGENESIS	-0.123293	-0.0294826	-7.8093	3.22558e-14	1.13079e-13	21.3667
GOBP_CYTOCHROME_COMPLEX_ASSEMBLY	-0.20939	-0.0482285	-7.80646	3.2913e-14	1.15305e-13	21.3468
GOBP_NEGATIVE_REGULATION_OF_VASCULAR_ENDOTHELIAL_CELL_PROLIFERATION	0.165921	0.0493296	7.80573	3.30834e-14	1.15825e-13	21.3418
GOBP_REGULATION_OF_ACTIN_NUCLEATION	-0.160417	-0.0456476	-7.79443	3.58433e-14	1.25404e-13	21.2631
GOBP_TONGUE_MORPHOGENESIS	-0.203154	-0.0248622	-7.79337	3.61147e-14	1.26269e-13	21.2557
GOBP_RESPONSE_TO_TESTOSTERONE	-0.1271	-0.0187885	-7.79033	3.6899e-14	1.28839e-13	21.2346
GOBP_NEGATIVE_REGULATION_OF_CILIUM_ASSEMBLY	-0.177057	-0.0360769	-7.78899	3.72522e-14	1.29986e-13	21.2252
GOBP_HYDROGEN_PEROXIDE_CATABOLIC_PROCESS	0.156026	-0.00978322	7.78754	3.76368e-14	1.3124e-13	21.2151
GOBP_REGULATION_OF_CELL_FATE_COMMITMENT	0.154507	0.00171198	7.7863	3.7967e-14	1.32304e-13	21.2065
GOBP_BRANCHED_CHAIN_AMINO_ACID_CATABOLIC_PROCESS	-0.208649	-0.0434973	-7.7842	3.8536e-14	1.34158e-13	21.1919
GOBP_REGULATION_OF_LYSOSOMAL_PROTEIN_CATABOLIC_PROCESS	-0.22293	-0.0460662	-7.78415	3.85504e-14	1.34158e-13	21.1916
GOBP_LABYRINTHINE_LAYER_BLOOD_VESSEL_DEVELOPMENT	-0.160978	-0.0317139	-7.77448	4.12807e-14	1.4347e-13	21.1243
GOBP_ETHANOL_CATABOLIC_PROCESS	0.181752	-0.00921138	7.76807	4.3194e-14	1.5002e-13	21.0798
GOBP_NEGATIVE_REGULATION_OF_CELL_SUBSTRATE_ADHESION	-0.120802	-0.0292899	-7.7671	4.34899e-14	1.50947e-13	21.0731
GOBP_DENDRITIC_TRANSPORT	-0.246998	-0.0450212	-7.76145	4.52615e-14	1.56992e-13	21.0339
GOBP_PROTEIN_MONO_ADP_RIBOSYLATION	-0.236074	-0.042448	-7.76119	4.53463e-14	1.57183e-13	21.0321
GOBP_REGULATION_OF_GLUCOSE_TRANSMEMBRANE_TRANSPORT	-0.114251	-0.0218127	-7.76032	4.56236e-14	1.58039e-13	21.0261
GOBP_POSITIVE_REGULATION_OF_CELLULAR_RESPONSE_TO_TRANSFORMING_GROWTH_FACTOR_BETA_STIMULUS	-0.165942	-0.0323085	-7.74352	5.13666e-14	1.77815e-13	20.9097
GOBP_NEGATIVE_REGULATION_OF_PROTEIN_LOCALIZATION	-0.113455	-0.0344994	-7.73696	5.37964e-14	1.86103e-13	20.8643
GOBP_HEPATOCYTE_APOPTOTIC_PROCESS	-0.232678	-0.0280833	-7.736	5.4163e-14	1.87248e-13	20.8576
GOBP_INTERMEMBRANE_LIPID_TRANSFER	-0.117084	-0.0429166	-7.73391	5.49637e-14	1.89891e-13	20.8432
GOBP_NEURON_PROJECTION_ORGANIZATION	-0.181452	-0.0412185	-7.73226	5.56074e-14	1.91988e-13	20.8318
GOBP_REGULATION_OF_DENDRITIC_SPINE_DEVELOPMENT	-0.206924	-0.0381331	-7.72931	5.6775e-14	1.95891e-13	20.8114
GOBP_REGULATION_OF_CLATHRIN_DEPENDENT_ENDOCYTOSIS	-0.218496	-0.0245146	-7.72062	6.03533e-14	2.07963e-13	20.7513
GOBP_BASEMENT_MEMBRANE_ASSEMBLY	-0.159743	-0.0454579	-7.71461	6.29606e-14	2.16805e-13	20.7098
GOBP_SEMAPHORIN_PLEXIN_SIGNALING_PATHWAY_INVOLVED_IN_NEURON_PROJECTION_GUIDANCE	-0.193024	-0.0470646	-7.7134	6.34972e-14	2.18509e-13	20.7015
GOBP_EPITHELIAL_TUBE_FORMATION	-0.127701	-0.0344415	-7.70783	6.60329e-14	2.27086e-13	20.663
GOBP_EMBRYONIC_PLACENTA_DEVELOPMENT	-0.12997	-0.0287072	-7.70325	6.81922e-14	2.34357e-13	20.6314
GOBP_ENDONUCLEOLYTIC_CLEAVAGE_INVOLVED_IN_RRNA_PROCESSING	-0.292111	-0.0370164	-7.70238	6.86079e-14	2.35632e-13	20.6255
GOBP_MEMBRANE_DOCKING	-0.134447	-0.0412662	-7.70113	6.92174e-14	2.37569e-13	20.6168
GOBP_CELLULAR_RESPONSE_TO_STEROL	-0.151066	-0.0115153	-7.69958	6.99719e-14	2.40002e-13	20.6061
GOBP_REGULATION_OF_PROTEIN_LOCALIZATION_TO_MEMBRANE	-0.118148	-0.038218	-7.69553	7.19886e-14	2.46758e-13	20.5782
GOBP_ORGAN_GROWTH	-0.100357	-0.0200065	-7.69275	7.34069e-14	2.51455e-13	20.5591
GOBP_RECEPTOR_CATABOLIC_PROCESS	-0.190686	-0.0408858	-7.69017	7.47493e-14	2.55886e-13	20.5413
GOBP_VENTRICULAR_SEPTUM_DEVELOPMENT	-0.131944	-0.0238047	-7.68948	7.51085e-14	2.56947e-13	20.5366
GOBP_DORSAL_VENTRAL_NEURAL_TUBE_PATTERNING	-0.160489	-0.0235869	-7.68605	7.69392e-14	2.63039e-13	20.5129
GOBP_REGULATION_OF_INTRINSIC_APOPTOTIC_SIGNALING_PATHWAY_IN_RESPONSE_TO_DNA_DAMAGE_BY_P53_CLASS_MEDIATOR	-0.178248	-0.0469179	-7.68521	7.73942e-14	2.64422e-13	20.5072
GOBP_SPLICEOSOMAL_COMPLEX_ASSEMBLY	-0.18228	-0.0345303	-7.68208	7.911e-14	2.70108e-13	20.4856
GOBP_REGULATION_OF_NOTCH_SIGNALING_PATHWAY	-0.105223	-0.0303763	-7.67806	8.13695e-14	2.77642e-13	20.458
GOBP_POSITIVE_REGULATION_OF_DNA_DAMAGE_RESPONSE_SIGNAL_TRANSDUCTION_BY_P53_CLASS_MEDIATOR	-0.166439	-0.0437381	-7.67321	8.41782e-14	2.87038e-13	20.4247
GOBP_OOCYTE_MATURATION	-0.148078	-0.0331916	-7.67265	8.45099e-14	2.87982e-13	20.4208
GOBP_DEFENSE_RESPONSE_TO_GRAM_NEGATIVE_BACTERIUM	0.150471	0.0209521	7.66558	8.87953e-14	3.02389e-13	20.3722
GOBP_POSITIVE_REGULATION_OF_TRANSCRIPTION_FROM_RNA_POLYMERASE_II_PROMOTER_IN_RESPONSE_TO_STRESS	-0.184132	-0.0322028	-7.66276	9.05649e-14	3.08215e-13	20.3529
GOBP_ENDOCARDIUM_DEVELOPMENT	-0.20012	-0.0383157	-7.65428	9.60998e-14	3.26839e-13	20.2946
GOBP_THIOESTER_BIOSYNTHETIC_PROCESS	-0.169995	-0.041661	-7.65153	9.79599e-14	3.32949e-13	20.2758
GOBP_PYRUVATE_METABOLIC_PROCESS	-0.129977	-0.036501	-7.64973	9.92019e-14	3.36952e-13	20.2634
GOBP_HOMOLOGOUS_RECOMBINATION	-0.165601	-0.038041	-7.64784	1.00523e-13	3.4122e-13	20.2504
GOBP_EMBRYONIC_CAMERA_TYPE_EYE_MORPHOGENESIS	-0.149516	-0.0122544	-7.64436	1.02993e-13	3.49377e-13	20.2266
GOBP_SYNAPTIC_VESICLE_LOCALIZATION	-0.19407	-0.0424785	-7.63619	1.09038e-13	3.69642e-13	20.1706
GOBP_REVERSE_CHOLESTEROL_TRANSPORT	0.17685	-0.0064938	7.63393	1.10765e-13	3.75256e-13	20.1552
GOBP_DIOL_BIOSYNTHETIC_PROCESS	-0.166835	-0.0479273	-7.63238	1.11974e-13	3.79105e-13	20.1446
GOBP_PENTOSE_METABOLIC_PROCESS	-0.157959	-0.0460699	-7.6307	1.13293e-13	3.83325e-13	20.1331
GOBP_PROTEIN_CONTAINING_COMPLEX_REMODELING	0.154458	-0.00624884	7.62978	1.14021e-13	3.85537e-13	20.1268
GOBP_RESPONSE_TO_MUSCLE_STRETCH	-0.154805	-0.0380709	-7.62317	1.19393e-13	4.03444e-13	20.0816
GOBP_REGULATION_OF_DNA_METHYLATION	-0.174539	-0.0224105	-7.62138	1.20895e-13	4.08255e-13	20.0693
GOBP_POSITIVE_REGULATION_OF_TYPE_I_INTERFERON_PRODUCTION	-0.216511	-0.0393893	-7.61866	1.23206e-13	4.15791e-13	20.0507
GOBP_PHOSPHOLIPID_DEPHOSPHORYLATION	-0.171448	-0.03463	-7.6162	1.25335e-13	4.22704e-13	20.0339
GOBP_DNA_REPLICATION_INDEPENDENT_CHROMATIN_ORGANIZATION	-0.190795	-0.0394314	-7.61186	1.29174e-13	4.3537e-13	20.0043
GOBP_MITOCHONDRION_DISTRIBUTION	-0.196709	-0.0275167	-7.60425	1.36196e-13	4.58744e-13	19.9523
GOBP_MICROTUBULE_DEPOLYMERIZATION	-0.18077	-0.0260165	-7.60107	1.39248e-13	4.6872e-13	19.9306
GOBP_ENTRAINMENT_OF_CIRCADIAN_CLOCK	-0.13511	-0.0386409	-7.59291	1.47369e-13	4.95738e-13	19.875
GOBP_REGULATION_OF_SECONDARY_METABOLIC_PROCESS	-0.176289	-0.0318979	-7.58486	1.55835e-13	5.23881e-13	19.8201
GOBP_ADHERENS_JUNCTION_ASSEMBLY	-0.194494	-0.0455655	-7.58147	1.5955e-13	5.36026e-13	19.797
GOBP_DEVELOPMENTAL_CELL_GROWTH	-0.141612	-0.0359659	-7.57896	1.6235e-13	5.45084e-13	19.7799
GOBP_LONG_CHAIN_FATTY_ACID_METABOLIC_PROCESS	0.120595	-0.0265081	7.57859	1.62759e-13	5.46109e-13	19.7775
GOBP_NEGATIVE_REGULATION_OF_LEUKOCYTE_CHEMOTAXIS	0.181525	-0.0187596	7.57831	1.63082e-13	5.46843e-13	19.7755
GOBP_AMP_METABOLIC_PROCESS	-0.153256	-0.0383402	-7.57425	1.67741e-13	5.61746e-13	19.7479
GOBP_REGULATION_OF_PROTEIN_POLYMERIZATION	-0.119179	-0.041011	-7.56934	1.73538e-13	5.80786e-13	19.7145
GOBP_SENSORY_PERCEPTION_OF_BITTER_TASTE	0.124968	0.0217393	7.56428	1.79731e-13	6.01131e-13	19.6801
GOBP_CELLULAR_RESPONSE_TO_COLD	-0.205566	-0.043674	-7.56408	1.79983e-13	6.0159e-13	19.6788
GOBP_NUCLEOSOME_ORGANIZATION	-0.152246	-0.0275298	-7.56017	1.84918e-13	6.17358e-13	19.6522
GOBP_BONE_MINERALIZATION_INVOLVED_IN_BONE_MATURATION	0.156185	-0.0131857	7.56016	1.84936e-13	6.17358e-13	19.6521
GOBP_PROTEIN_PEPTIDYL_PROLYL_ISOMERIZATION	-0.14579	-0.0519198	-7.54695	2.02628e-13	6.75127e-13	19.5625
GOBP_ATRIAL_SEPTUM_MORPHOGENESIS	-0.166825	-0.00415694	-7.54661	2.031e-13	6.7627e-13	19.5602
GOBP_CELLULAR_RESPONSE_TO_ETHANOL	-0.195436	-0.0193414	-7.54251	2.08949e-13	6.95301e-13	19.5323
GOBP_B_CELL_ACTIVATION_INVOLVED_IN_IMMUNE_RESPONSE	-0.150145	-0.0343949	-7.54231	2.09231e-13	6.95799e-13	19.531
GOBP_BOX_C_D_SNORNP_ASSEMBLY	-0.232906	-0.0547214	-7.53754	2.16236e-13	7.18638e-13	19.4987
GOBP_REGULATION_OF_PH	-0.119483	-0.0380673	-7.53539	2.19479e-13	7.28953e-13	19.4841
GOBP_NEGATIVE_REGULATION_OF_PROTEIN_SUMOYLATION	-0.204759	-0.0218398	-7.52675	2.32957e-13	7.7323e-13	19.4256
GOBP_MACROMOLECULE_DEPALMITOYLATION	-0.194143	-0.045657	-7.52623	2.33799e-13	7.75533e-13	19.4221
GOBP_NEGATIVE_REGULATION_OF_VIRAL_INDUCED_CYTOPLASMIC_PATTERN_RECOGNITION_RECEPTOR_SIGNALING_PATHWAY	-0.227343	-0.0493965	-7.51785	2.47699e-13	8.21121e-13	19.3654
GOBP_RIBONUCLEOSIDE_DIPHOSPHATE_METABOLIC_PROCESS	-0.11483	-0.0399714	-7.51569	2.51416e-13	8.32916e-13	19.3508
GOBP_COBALAMIN_METABOLIC_PROCESS	-0.167277	-0.0450637	-7.51479	2.52985e-13	8.37584e-13	19.3447
GOBP_PROTEIN_NEDDYLATION	-0.181294	-0.041583	-7.51398	2.54397e-13	8.41727e-13	19.3392
GOBP_DENDRITE_DEVELOPMENT	-0.166147	-0.0360318	-7.51387	2.54598e-13	8.41859e-13	19.3384
GOBP_REGULATION_OF_GTPASE_ACTIVITY	-0.113475	-0.0301605	-7.51183	2.582e-13	8.53234e-13	19.3247
GOBP_OSTEOBLAST_DIFFERENTIATION	-0.101677	-0.030261	-7.50372	2.73022e-13	9.01644e-13	19.2699
GOBP_REGULATION_OF_NEUROBLAST_PROLIFERATION	-0.141587	-0.0159468	-7.50146	2.77307e-13	9.15218e-13	19.2546
GOBP_REGULATION_OF_LYSOSOMAL_LUMEN_PH	-0.232839	-0.0391184	-7.49459	2.90732e-13	9.5892e-13	19.2082
GOBP_REGULATION_OF_MEMBRANE_LIPID_DISTRIBUTION	-0.128293	-0.0416091	-7.49207	2.95801e-13	9.75029e-13	19.1913
GOBP_MICROTUBULE_BASED_MOVEMENT	-0.108342	-0.0312425	-7.48993	3.00185e-13	9.88857e-13	19.1768
GOBP_REGULATION_OF_OXIDATIVE_STRESS_INDUCED_CELL_DEATH	-0.125695	-0.0340817	-7.48921	3.01672e-13	9.93131e-13	19.172
GOBP_HUMORAL_IMMUNE_RESPONSE	0.151838	0.0150759	7.48834	3.03485e-13	9.9847e-13	19.1661
GOBP_GASTRULATION	-0.105099	-0.023366	-7.48477	3.11009e-13	1.02258e-12	19.1421
GOBP_FOLIC_ACID_METABOLIC_PROCESS	-0.205096	-0.0279036	-7.48196	3.17076e-13	1.04188e-12	19.1231
GOBP_REGULATION_OF_EXTENT_OF_CELL_GROWTH	-0.138675	-0.0368184	-7.48045	3.20388e-13	1.0521e-12	19.1129
GOBP_PHAGOSOME_LYSOSOME_FUSION	-0.182608	-0.0352249	-7.48033	3.20639e-13	1.05227e-12	19.1122
GOBP_POSITIVE_REGULATION_OF_CYTOSKELETON_ORGANIZATION	-0.107562	-0.0337724	-7.47254	3.38256e-13	1.10939e-12	19.0597
GOBP_POSITIVE_REGULATION_OF_TRIGLYCERIDE_LIPASE_ACTIVITY	0.17894	0.00756019	7.46653	3.52484e-13	1.15533e-12	19.0193
GOBP_REGULATION_OF_PRODUCTION_OF_SMALL_RNA_INVOLVED_IN_GENE_SILENCING_BY_RNA	-0.144955	-0.0193292	-7.46426	3.58016e-13	1.17273e-12	19.004
GOBP_NUCLEOTIDE_TRANSMEMBRANE_TRANSPORT	-0.133687	-0.0547254	-7.46214	3.63253e-13	1.18914e-12	18.9898
GOBP_REGULATION_OF_PROTEIN_GLYCOSYLATION	-0.169968	-0.0467524	-7.46135	3.6522e-13	1.19483e-12	18.9845
GOBP_NEGATIVE_REGULATION_OF_EXTRINSIC_APOPTOTIC_SIGNALING_PATHWAY	-0.123448	-0.0266635	-7.46083	3.66536e-13	1.19839e-12	18.9809
GOBP_POSITIVE_REGULATION_OF_ARP2_3_COMPLEX_MEDIATED_ACTIN_NUCLEATION	-0.225666	-0.0421254	-7.45205	3.89239e-13	1.27182e-12	18.922
GOBP_REGULATION_OF_ATP_DEPENDENT_ACTIVITY	-0.10145	-0.0329884	-7.4494	3.96366e-13	1.2943e-12	18.9042
GOBP_XENOBIOTIC_METABOLIC_PROCESS	0.110036	0.00291508	7.44853	3.98733e-13	1.30122e-12	18.8984
GOBP_LEPTIN_MEDIATED_SIGNALING_PATHWAY	-0.205693	-0.0506252	-7.44444	4.10063e-13	1.33736e-12	18.8709
GOBP_POSITIVE_REGULATION_OF_NEURON_DEATH	-0.12131	-0.0341985	-7.44079	4.20433e-13	1.37033e-12	18.8464
GOBP_FOREBRAIN_CELL_MIGRATION	-0.16582	-0.0411989	-7.43973	4.23489e-13	1.37943e-12	18.8393
GOBP_POSITIVE_REGULATION_OF_GLYCOPROTEIN_METABOLIC_PROCESS	-0.166557	-0.029847	-7.43834	4.27532e-13	1.39174e-12	18.83
GOBP_POSITIVE_REGULATION_OF_PROTEOLYSIS	-0.112317	-0.0396799	-7.43768	4.29462e-13	1.39715e-12	18.8255
GOBP_NEUROBLAST_PROLIFERATION	-0.124164	-0.0227504	-7.43536	4.36309e-13	1.41855e-12	18.81
GOBP_PLASMA_LIPOPROTEIN_PARTICLE_CLEARANCE	0.11642	-0.0113525	7.43246	4.45051e-13	1.44607e-12	18.7906
GOBP_POSITIVE_REGULATION_OF_G_PROTEIN_COUPLED_RECEPTOR_SIGNALING_PATHWAY	0.147715	-0.018965	7.42972	4.53459e-13	1.47248e-12	18.7722
GOBP_REGULATION_OF_CARBOHYDRATE_CATABOLIC_PROCESS	-0.116163	-0.0363743	-7.42863	4.56839e-13	1.48253e-12	18.7649
GOBP_BASEMENT_MEMBRANE_ORGANIZATION	-0.140618	-0.0456339	-7.42603	4.65039e-13	1.50821e-12	18.7475
GOBP_PROTEIN_REFOLDING	-0.170703	-0.0345716	-7.42239	4.7672e-13	1.54514e-12	18.7232
GOBP_PEPTIDYL_PROLINE_MODIFICATION	-0.144745	-0.0545994	-7.42126	4.8043e-13	1.5562e-12	18.7156
GOBP_NEGATIVE_REGULATION_OF_EXCITATORY_POSTSYNAPTIC_POTENTIAL	-0.221501	-0.0260301	-7.41561	4.993e-13	1.61632e-12	18.6778
GOBP_GLANDULAR_EPITHELIAL_CELL_DIFFERENTIATION	-0.112984	-0.00980076	-7.41406	5.04593e-13	1.63152e-12	18.6674
GOBP_MITOCHONDRIAL_TRANSMEMBRANE_TRANSPORT	-0.148727	-0.0482849	-7.41406	5.04617e-13	1.63152e-12	18.6674
GOBP_NEGATIVE_REGULATION_OF_ANDROGEN_RECEPTOR_SIGNALING_PATHWAY	-0.1551	-0.03766	-7.40888	5.22735e-13	1.68906e-12	18.6328
GOBP_NEGATIVE_REGULATION_OF_RNA_SPLICING	-0.215392	-0.0397722	-7.40851	5.24079e-13	1.69236e-12	18.6303
GOBP_PURINE_RIBONUCLEOSIDE_METABOLIC_PROCESS	-0.147298	-0.033072	-7.40488	5.37205e-13	1.73368e-12	18.606
GOBP_REGULATION_OF_AUTOPHAGY_OF_MITOCHONDRION_IN_RESPONSE_TO_MITOCHONDRIAL_DEPOLARIZATION	-0.18177	-0.0470108	-7.4031	5.43728e-13	1.75365e-12	18.5942
GOBP_NEGATIVE_REGULATION_OF_MRNA_SPLICING_VIA_SPLICEOSOME	-0.237086	-0.0412397	-7.40203	5.47733e-13	1.76548e-12	18.587
GOBP_REGULATION_OF_PROTEIN_LOCALIZATION_TO_CELL_SURFACE	-0.119127	-0.0373526	-7.40018	5.54655e-13	1.78669e-12	18.5747
GOBP_REGULATION_OF_TRANSFORMING_GROWTH_FACTOR_BETA1_PRODUCTION	-0.180433	-0.0214993	-7.38553	6.12787e-13	1.97274e-12	18.4769
GOBP_NEGATIVE_REGULATION_OF_ACTIVIN_RECEPTOR_SIGNALING_PATHWAY	-0.158934	-0.0332805	-7.38356	6.21067e-13	1.99817e-12	18.4638
GOBP_MORPHOGENESIS_OF_EMBRYONIC_EPITHELIUM	-0.116162	-0.0293364	-7.38004	6.36072e-13	2.04519e-12	18.4404
GOBP_ACROSOME_ASSEMBLY	-0.127084	-0.0120213	-7.37079	6.77309e-13	2.17644e-12	18.3788
GOBP_INOSITOL_PHOSPHATE_CATABOLIC_PROCESS	-0.197347	-0.0338708	-7.36738	6.93191e-13	2.22611e-12	18.356
GOBP_REGULATION_OF_BROWN_FAT_CELL_DIFFERENTIATION	-0.136827	-0.0371396	-7.35955	7.3098e-13	2.34603e-12	18.304
GOBP_POSITIVE_REGULATION_OF_INTERFERON_ALPHA_PRODUCTION	-0.244532	-0.0347434	-7.35579	7.49881e-13	2.40522e-12	18.279
GOBP_NEGATIVE_REGULATION_OF_CELL_MATRIX_ADHESION	-0.129871	-0.0254189	-7.35514	7.53193e-13	2.41436e-12	18.2746
GOBP_REGULATION_OF_INTRINSIC_APOPTOTIC_SIGNALING_PATHWAY	-0.127108	-0.0376063	-7.33787	8.46593e-13	2.7121e-12	18.16
GOBP_SPINDLE_MIDZONE_ASSEMBLY	-0.227875	-0.0583545	-7.33627	8.55814e-13	2.73996e-12	18.1494
GOBP_REGULATION_OF_APOPTOTIC_SIGNALING_PATHWAY	-0.11566	-0.0338923	-7.33345	8.72295e-13	2.79102e-12	18.1307
GOBP_FC_EPSILON_RECEPTOR_SIGNALING_PATHWAY	-0.188062	-0.0258601	-7.33176	8.82289e-13	2.82128e-12	18.1195
GOBP_DETECTION_OF_MECHANICAL_STIMULUS_INVOLVED_IN_SENSORY_PERCEPTION_OF_SOUND	0.178822	-0.023288	7.33066	8.88918e-13	2.84074e-12	18.1122
GOBP_2_OXOGLUTARATE_METABOLIC_PROCESS	-0.17203	-0.0411906	-7.32975	8.94406e-13	2.85654e-12	18.1062
GOBP_GABAERGIC_NEURON_DIFFERENTIATION	0.20357	-0.00158643	7.32071	9.50722e-13	3.03141e-12	18.0463
GOBP_RESPONSE_TO_INTERLEUKIN_7	-0.240549	-0.0499073	-7.32068	9.50895e-13	3.03141e-12	18.0461
GOBP_ENDODERM_FORMATION	-0.136983	-0.0351188	-7.31891	9.6235e-13	3.06606e-12	18.0344
GOBP_REGULATION_OF_NEURON_PROJECTION_ARBORIZATION	-0.164326	-0.0421221	-7.31687	9.75658e-13	3.10658e-12	18.0209
GOBP_NEURON_PROJECTION_EXTENSION	-0.150584	-0.0376184	-7.31608	9.80884e-13	3.12132e-12	18.0157
GOBP_NOREPINEPHRINE_SECRETION	0.203678	-0.0188272	7.31139	1.0124e-12	3.21922e-12	17.9847
GOBP_REGULATION_OF_PROTEIN_LOCALIZATION_TO_CELL_PERIPHERY	-0.117683	-0.0369325	-7.31132	1.01288e-12	3.21922e-12	17.9842
GOBP_LEUKOTRIENE_BIOSYNTHETIC_PROCESS	0.171819	-0.0230046	7.30913	1.02798e-12	3.26525e-12	17.9697
GOBP_LIMBIC_SYSTEM_DEVELOPMENT	-0.118326	-0.0249879	-7.30692	1.0434e-12	3.31022e-12	17.9551
GOBP_MEMBRANE_PROTEIN_PROTEOLYSIS	-0.156388	-0.037864	-7.30464	1.05956e-12	3.35943e-12	17.9401
GOBP_NOREPINEPHRINE_TRANSPORT	0.174183	-0.0151474	7.30361	1.06695e-12	3.38082e-12	17.9333
GOBP_POSITIVE_REGULATION_OF_CIRCADIAN_RHYTHM	-0.168316	-0.0161207	-7.30336	1.06872e-12	3.38438e-12	17.9316
GOBP_POSITIVE_REGULATION_OF_PROTEIN_EXIT_FROM_ENDOPLASMIC_RETICULUM	-0.179269	-0.0400575	-7.29748	1.11191e-12	3.51902e-12	17.8928
GOBP_RRNA_BASE_METHYLATION	-0.242888	-0.0520803	-7.29022	1.16762e-12	3.69312e-12	17.8449
GOBP_PSEUDOURIDINE_SYNTHESIS	-0.244675	-0.0479606	-7.28961	1.17244e-12	3.70539e-12	17.8408
GOBP_CHROMOSOME_ORGANIZATION_INVOLVED_IN_MEIOTIC_CELL_CYCLE	-0.134785	-0.0330702	-7.28955	1.17291e-12	3.70539e-12	17.8404
GOBP_SYMPATHETIC_NERVOUS_SYSTEM_DEVELOPMENT	-0.156394	-0.00370411	-7.28922	1.17555e-12	3.71147e-12	17.8382
GOBP_NEUROMUSCULAR_JUNCTION_DEVELOPMENT	-0.130756	-0.0357055	-7.28698	1.19333e-12	3.76535e-12	17.8235
GOBP_DITERPENOID_BIOSYNTHETIC_PROCESS	0.159326	0.00623113	7.28551	1.20522e-12	3.80059e-12	17.8138
GOBP_INTERMEDIATE_FILAMENT_ORGANIZATION	0.160539	0.0178947	7.28492	1.20999e-12	3.81332e-12	17.8099
GOBP_NEGATIVE_REGULATION_OF_OXIDATIVE_STRESS_INDUCED_CELL_DEATH	-0.123876	-0.0343375	-7.27942	1.25558e-12	3.95463e-12	17.7737
GOBP_CELLULAR_AMINO_ACID_BIOSYNTHETIC_PROCESS	-0.107909	-0.0327869	-7.27779	1.26948e-12	3.996e-12	17.7629
GOBP_REGULATION_OF_PEPTIDYL_THREONINE_PHOSPHORYLATION	-0.110231	-0.035182	-7.27716	1.2748e-12	4.00895e-12	17.7588
GOBP_REGULATION_OF_ENDOPLASMIC_RETICULUM_STRESS_INDUCED_INTRINSIC_APOPTOTIC_SIGNALING_PATHWAY	-0.158589	-0.0357938	-7.27713	1.27512e-12	4.00895e-12	17.7586
GOBP_CELLULAR_CARBOHYDRATE_CATABOLIC_PROCESS	-0.125405	-0.0356026	-7.27518	1.29187e-12	4.05918e-12	17.7458
GOBP_INTRINSIC_APOPTOTIC_SIGNALING_PATHWAY_BY_P53_CLASS_MEDIATOR	-0.12797	-0.0392818	-7.26177	1.41367e-12	4.4392e-12	17.6575
GOBP_REGULATION_OF_PROTEIN_LIPIDATION	-0.232543	-0.0442239	-7.25802	1.4496e-12	4.5493e-12	17.6329
GOBP_ICOSANOID_BIOSYNTHETIC_PROCESS	0.131416	-0.0165934	7.25693	1.46023e-12	4.57994e-12	17.6257
GOBP_AMYLOID_PRECURSOR_PROTEIN_CATABOLIC_PROCESS	-0.13077	-0.0359477	-7.25317	1.49758e-12	4.69427e-12	17.601
GOBP_POSITIVE_REGULATION_OF_VASCULAR_ENDOTHELIAL_CELL_PROLIFERATION	-0.129361	-0.0187194	-7.25244	1.50485e-12	4.71423e-12	17.5962
GOBP_NEGATIVE_REGULATION_OF_DNA_DAMAGE_RESPONSE_SIGNAL_TRANSDUCTION_BY_P53_CLASS_MEDIATOR	-0.169496	-0.0435551	-7.25069	1.52266e-12	4.76718e-12	17.5847
GOBP_MUSCLE_HYPERTROPHY	-0.103215	-0.0267328	-7.23141	1.73249e-12	5.42088e-12	17.4582
GOBP_FOREBRAIN_NEURON_DEVELOPMENT	-0.128597	-0.0347272	-7.23057	1.74213e-12	5.4478e-12	17.4527
GOBP_ARACHIDONIC_ACID_SECRETION	0.114625	0.00646832	7.23006	1.74815e-12	5.46337e-12	17.4493
GOBP_WOUND_HEALING_SPREADING_OF_EPIDERMAL_CELLS	-0.16835	-0.0332065	-7.22891	1.76162e-12	5.50218e-12	17.4418
GOBP_REGULATION_OF_INTESTINAL_LIPID_ABSORPTION	0.176843	-0.0228238	7.2282	1.77003e-12	5.52516e-12	17.4372
GOBP_REGULATION_OF_RHO_PROTEIN_SIGNAL_TRANSDUCTION	-0.114747	-0.0382051	-7.22373	1.82372e-12	5.68936e-12	17.4079
GOBP_XENOBIOTIC_CATABOLIC_PROCESS	0.133375	-0.0141465	7.22135	1.85292e-12	5.77356e-12	17.3923
GOBP_HEMOGLOBIN_BIOSYNTHETIC_PROCESS	-0.146538	-0.0212135	-7.20462	2.07188e-12	6.452e-12	17.2829
GOBP_G0_TO_G1_TRANSITION	-0.15111	-0.0393007	-7.20139	2.11699e-12	6.58856e-12	17.2618
GOBP_RETINOIC_ACID_METABOLIC_PROCESS	0.129833	-0.003363	7.1969	2.18127e-12	6.7846e-12	17.2325
GOBP_ORGANIC_CATION_TRANSPORT	-0.111604	-0.0364963	-7.19498	2.20932e-12	6.86777e-12	17.22
GOBP_TYPE_I_INTERFERON_PRODUCTION	-0.189316	-0.0376114	-7.19208	2.25241e-12	6.99756e-12	17.201
GOBP_ACTIVATION_OF_GTPASE_ACTIVITY	-0.110254	-0.0262468	-7.19025	2.27997e-12	7.07478e-12	17.1891
GOBP_ADHERENS_JUNCTION_ORGANIZATION	-0.135931	-0.0341544	-7.18913	2.297e-12	7.12341e-12	17.1818
GOBP_NUCLEUS_LOCALIZATION	-0.173715	-0.0359676	-7.18653	2.33713e-12	7.24357e-12	17.1649
GOBP_RESOLUTION_OF_MEIOTIC_RECOMBINATION_INTERMEDIATES	-0.196086	-0.0421291	-7.18402	2.37647e-12	7.36117e-12	17.1485
GOBP_NUCLEOLAR_CHROMATIN_ORGANIZATION	-0.25513	-0.0313978	-7.18357	2.3837e-12	7.37919e-12	17.1455
GOBP_DEVELOPMENTAL_GROWTH_INVOLVED_IN_MORPHOGENESIS	-0.127885	-0.0335251	-7.17355	2.54782e-12	7.87795e-12	17.0803
GOBP_RESPONSE_TO_INCREASED_OXYGEN_LEVELS	-0.141213	-0.0310972	-7.16877	2.63006e-12	8.12743e-12	17.0492
GOBP_DENDRITE_MORPHOGENESIS	-0.173608	-0.0360286	-7.16654	2.66941e-12	8.2442e-12	17.0346
GOBP_NEGATIVE_REGULATION_OF_TORC1_SIGNALING	-0.165969	-0.0371929	-7.16044	2.7797e-12	8.57974e-12	16.995
GOBP_REGULATION_OF_VIRAL_PROCESS	-0.151631	-0.0335535	-7.15552	2.87196e-12	8.8593e-12	16.963
GOBP_POSITIVE_REGULATION_OF_SMAD_PROTEIN_SIGNAL_TRANSDUCTION	-0.156602	-0.0364198	-7.14804	3.01792e-12	9.30407e-12	16.9144
GOBP_REGULATION_OF_NUCLEASE_ACTIVITY	-0.17279	-0.0281015	-7.14713	3.03612e-12	9.35468e-12	16.9085
GOBP_CARDIOLIPIN_METABOLIC_PROCESS	-0.167884	-0.0405836	-7.1412	3.15784e-12	9.724e-12	16.87
GOBP_REGULATION_OF_TRANSCRIPTION_FROM_RNA_POLYMERASE_II_PROMOTER_IN_RESPONSE_TO_HYPOXIA	-0.201825	-0.0340621	-7.13825	3.22002e-12	9.90382e-12	16.8509
GOBP_JNK_CASCADE	-0.105504	-0.0328781	-7.1233	3.55486e-12	1.09209e-11	16.7541
GOBP_REGULATION_OF_ACTIN_FILAMENT_ORGANIZATION	-0.113304	-0.0404341	-7.11728	3.69891e-12	1.13567e-11	16.7151
GOBP_POSITIVE_REGULATION_OF_MITOTIC_NUCLEAR_DIVISION	-0.130851	-0.0353366	-7.11626	3.72403e-12	1.14235e-11	16.7085
GOBP_DEOXYRIBONUCLEOSIDE_TRIPHOSPHATE_METABOLIC_PROCESS	-0.187455	-0.0432247	-7.11622	3.72502e-12	1.14235e-11	16.7083
GOBP_NEGATIVE_REGULATION_OF_ANOIKIS	-0.182033	-0.0267239	-7.11596	3.73129e-12	1.14361e-11	16.7066
GOBP_REGULATION_OF_PROTEIN_LOCALIZATION_TO_PLASMA_MEMBRANE	-0.123876	-0.0390638	-7.11328	3.79815e-12	1.16342e-11	16.6892
GOBP_CELLULAR_RESPONSE_TO_HYDROGEN_PEROXIDE	-0.101975	-0.0303913	-7.11187	3.83359e-12	1.17359e-11	16.6801
GOBP_RESPONSE_TO_GROWTH_HORMONE	-0.152297	-0.0160956	-7.1108	3.86061e-12	1.18117e-11	16.6732
GOBP_DENDRITIC_SPINE_MORPHOGENESIS	-0.18715	-0.0447976	-7.10925	3.90051e-12	1.19268e-11	16.6632
GOBP_GOLGI_TO_LYSOSOME_TRANSPORT	-0.19565	-0.0401806	-7.10835	3.92376e-12	1.19909e-11	16.6574
GOBP_REGULATION_OF_GASTRULATION	-0.13619	-0.00742773	-7.0999	4.14841e-12	1.26701e-11	16.6028
GOBP_PURINE_NUCLEOSIDE_MONOPHOSPHATE_METABOLIC_PROCESS	-0.128686	-0.0379386	-7.09408	4.31079e-12	1.31583e-11	16.5652
GOBP_NEGATIVE_REGULATION_OF_DNA_BINDING	-0.118372	-0.0315799	-7.09172	4.37817e-12	1.33562e-11	16.55
GOBP_EMBRYONIC_CAMERA_TYPE_EYE_DEVELOPMENT	-0.13709	-0.0170831	-7.08866	4.46723e-12	1.362e-11	16.5303
GOBP_EPHRIN_RECEPTOR_SIGNALING_PATHWAY	-0.155019	-0.036731	-7.08411	4.60315e-12	1.40262e-11	16.501
GOBP_INTERFERON_BETA_PRODUCTION	-0.192303	-0.0424682	-7.07156	4.99911e-12	1.52239e-11	16.4202
GOBP_PEPTIDYL_L_CYSTEINE_S_PALMITOYLATION	-0.139623	-0.045364	-7.05981	5.40016e-12	1.64357e-11	16.3446
GOBP_REGULATION_OF_HYDROGEN_PEROXIDE_MEDIATED_PROGRAMMED_CELL_DEATH	-0.152768	-0.0323089	-7.05965	5.4059e-12	1.64436e-11	16.3436
GOBP_PROTEOGLYCAN_METABOLIC_PROCESS	-0.127944	-0.0407759	-7.05932	5.41778e-12	1.64702e-11	16.3414
GOBP_PROTEIN_DEPALMITOYLATION	-0.204883	-0.0476408	-7.05169	5.69587e-12	1.72855e-11	16.2924
GOBP_DEOXYRIBONUCLEOSIDE_MONOPHOSPHATE_CATABOLIC_PROCESS	0.161727	-0.0240012	7.04948	5.77868e-12	1.75266e-11	16.2783
GOBP_POSITIVE_REGULATION_OF_STEROID_METABOLIC_PROCESS	0.136636	-0.00554844	7.04901	5.79655e-12	1.75707e-11	16.2753
GOBP_POSITIVE_REGULATION_OF_PHOSPHATASE_ACTIVITY	-0.158453	-0.0326716	-7.04774	5.84503e-12	1.77074e-11	16.2671
GOBP_REGULATION_OF_DENDRITIC_SPINE_MORPHOGENESIS	-0.199415	-0.0513708	-7.04588	5.9168e-12	1.79145e-11	16.2552
GOBP_POSTSYNAPSE_ORGANIZATION	-0.142501	-0.0336456	-7.04525	5.94134e-12	1.79784e-11	16.2511
GOBP_PYRIMIDINE_NUCLEOTIDE_METABOLIC_PROCESS	-0.133034	-0.0481475	-7.04024	6.13941e-12	1.8567e-11	16.219
GOBP_NEGATIVE_REGULATION_OF_PROTEIN_ACETYLATION	-0.146111	-0.0372731	-7.03574	6.32312e-12	1.91116e-11	16.1902
GOBP_NEURAL_CREST_CELL_DIFFERENTIATION	-0.102885	-0.0244801	-7.03508	6.35045e-12	1.91831e-11	16.1859
GOBP_MEIOTIC_CHROMOSOME_SEGREGATION	-0.134451	-0.0355041	-7.03492	6.35718e-12	1.91924e-11	16.1849
GOBP_NUCLEOSIDE_DIPHOSPHATE_METABOLIC_PROCESS	-0.102014	-0.0410777	-7.03418	6.38804e-12	1.92744e-11	16.1802
GOBP_POSITIVE_REGULATION_OF_HAIR_FOLLICLE_DEVELOPMENT	0.153494	-0.021248	7.03147	6.50234e-12	1.9608e-11	16.1628
GOBP_EMBRYONIC_HEART_TUBE_DEVELOPMENT	-0.115425	-0.0271765	-7.02872	6.62004e-12	1.99515e-11	16.1452
GOBP_CELLULAR_RESPONSE_TO_FLUID_SHEAR_STRESS	-0.132331	-0.0430205	-7.02771	6.66417e-12	2.00729e-11	16.1387
GOBP_STRESS_FIBER_ASSEMBLY	-0.121169	-0.038705	-7.02452	6.80453e-12	2.04839e-11	16.1183
GOBP_PROGRAMMED_CELL_DEATH_IN_RESPONSE_TO_REACTIVE_OXYGEN_SPECIES	-0.143953	-0.0357244	-7.01524	7.22964e-12	2.17262e-11	16.059
GOBP_ENDOPLASMIC_RETICULUM_CALCIUM_ION_HOMEOSTASIS	-0.168447	-0.0451727	-7.01372	7.30217e-12	2.19316e-11	16.0492
GOBP_REGULATION_OF_CELL_SUBSTRATE_ADHESION	-0.113737	-0.0310679	-7.01357	7.30902e-12	2.19396e-11	16.0483
GOBP_REGULATION_OF_SKELETAL_MUSCLE_CONTRACTION	0.129282	-0.0177498	7.01199	7.38491e-12	2.21547e-11	16.0382
GOBP_MAMMARY_GLAND_EPITHELIAL_CELL_PROLIFERATION	-0.149676	-0.0320856	-7.00898	7.53158e-12	2.25818e-11	16.019
GOBP_MONOACYLGLYCEROL_METABOLIC_PROCESS	0.156947	-0.0521323	7.0083	7.56491e-12	2.26688e-11	16.0146
GOBP_POSITIVE_REGULATION_OF_STEM_CELL_PROLIFERATION	-0.100162	-0.0361161	-7.00717	7.62087e-12	2.28234e-11	16.0074
GOBP_STEROID_ESTERIFICATION	0.15659	-0.0270945	7.0046	7.74951e-12	2.31954e-11	15.991
GOBP_PROTEIN_HYDROXYLATION	-0.169391	-0.0546261	-6.99957	8.00822e-12	2.39288e-11	15.9589
GOBP_NATURAL_KILLER_CELL_DIFFERENTIATION	-0.16699	-0.0406566	-6.99726	8.12955e-12	2.42775e-11	15.9442
GOBP_ENDOCHONDRAL_BONE_MORPHOGENESIS	-0.121995	-0.0214258	-6.99468	8.26764e-12	2.46758e-11	15.9277
GOBP_NEGATIVE_REGULATION_OF_INTERLEUKIN_1_BETA_PRODUCTION	0.16006	-0.00491285	6.99425	8.29058e-12	2.47302e-11	15.925
GOBP_REGULATION_OF_RESPONSE_TO_REACTIVE_OXYGEN_SPECIES	-0.135575	-0.0364661	-6.99064	8.48786e-12	2.53043e-11	15.902
GOBP_NEGATIVE_REGULATION_OF_PROTEIN_CONTAINING_COMPLEX_ASSEMBLY	-0.112908	-0.0423237	-6.98512	8.79871e-12	2.6216e-11	15.8668
GOBP_REGULATION_OF_MICROTUBULE_POLYMERIZATION_OR_DEPOLYMERIZATION	-0.145784	-0.0323722	-6.98002	9.09559e-12	2.70852e-11	15.8343
GOBP_MEMBRANE_PROTEIN_ECTODOMAIN_PROTEOLYSIS	-0.156106	-0.0374155	-6.9778	9.22749e-12	2.74624e-11	15.8202
GOBP_REGULATION_OF_DEFENSE_RESPONSE_TO_VIRUS	-0.165478	-0.0446966	-6.97508	9.39197e-12	2.7936e-11	15.8029
GOBP_FAT_SOLUBLE_VITAMIN_CATABOLIC_PROCESS	0.197281	0.00361924	6.97404	9.45599e-12	2.81105e-11	15.7963
GOBP_RESPONSE_TO_HYDROGEN_PEROXIDE	-0.101746	-0.0311694	-6.97375	9.47383e-12	2.81476e-11	15.7944
GOBP_REGULATION_OF_NEURON_PROJECTION_DEVELOPMENT	-0.121668	-0.0357157	-6.97299	9.5204e-12	2.82699e-11	15.7896
GOBP_NEGATIVE_REGULATION_OF_PROTEIN_LOCALIZATION_TO_CELL_PERIPHERY	-0.157908	-0.0356316	-6.96803	9.83232e-12	2.91796e-11	15.7581
GOBP_NEUROTROPHIN_SIGNALING_PATHWAY	-0.136272	-0.0231674	-6.96677	9.91344e-12	2.94037e-11	15.75
GOBP_POSITIVE_REGULATION_OF_NERVOUS_SYSTEM_DEVELOPMENT	-0.109042	-0.0290992	-6.96475	1.00444e-11	2.97752e-11	15.7372
GOBP_REGULATION_OF_G0_TO_G1_TRANSITION	-0.151846	-0.0358045	-6.95753	1.0526e-11	3.11677e-11	15.6913
GOBP_PEPTIDE_CROSS_LINKING	0.137764	0.0161541	6.95724	1.05456e-11	3.12082e-11	15.6895
GOBP_CONSTITUTIVE_HETEROCHROMATIN_ASSEMBLY	-0.215193	-0.0388195	-6.94237	1.1613e-11	3.43475e-11	15.5952
GOBP_LINOLEIC_ACID_METABOLIC_PROCESS	0.136937	-0.0336758	6.94038	1.17635e-11	3.47731e-11	15.5826
GOBP_NEGATIVE_REGULATION_OF_HEMATOPOIETIC_PROGENITOR_CELL_DIFFERENTIATION	-0.188212	-0.0406351	-6.93777	1.19643e-11	3.53467e-11	15.566
GOBP_MEIOSIS_II_CELL_CYCLE_PROCESS	-0.218683	-0.0478655	-6.93761	1.19768e-11	3.53636e-11	15.565
GOBP_CELLULAR_RESPONSE_TO_GROWTH_HORMONE_STIMULUS	-0.180207	-0.0153124	-6.93567	1.21281e-11	3.57903e-11	15.5527
GOBP_MAINTENANCE_OF_CELL_POLARITY	-0.13045	-0.048544	-6.92918	1.26476e-11	3.73022e-11	15.5117
GOBP_NEGATIVE_REGULATION_OF_POSTTRANSCRIPTIONAL_GENE_SILENCING	-0.154908	-0.0355284	-6.92105	1.33299e-11	3.92925e-11	15.4603
GOBP_ADENOSINE_METABOLIC_PROCESS	-0.170506	-0.0203207	-6.9102	1.42979e-11	4.20984e-11	15.3917
GOBP_CELLULAR_MONOVALENT_INORGANIC_CATION_HOMEOSTASIS	-0.117707	-0.034206	-6.89799	1.54688e-11	4.54948e-11	15.3147
GOBP_CALCIUM_INDEPENDENT_CELL_CELL_ADHESION_VIA_PLASMA_MEMBRANE_CELL_ADHESION_MOLECULES	0.133567	-0.0120093	6.89484	1.57854e-11	4.64e-11	15.2949
GOBP_METHIONINE_METABOLIC_PROCESS	-0.14273	-0.035409	-6.88005	1.7362e-11	5.0977e-11	15.2018
GOBP_DOUBLE_STRAND_BREAK_REPAIR_VIA_BREAK_INDUCED_REPLICATION	-0.272992	-0.0485212	-6.87676	1.77329e-11	5.20369e-11	15.1811
GOBP_GLOMERULAR_EPITHELIAL_CELL_DEVELOPMENT	-0.168857	-0.025865	-6.87341	1.81195e-11	5.31416e-11	15.16
GOBP_MATURATION_OF_LSU_RRNA	-0.249509	-0.0349212	-6.85557	2.03176e-11	5.95551e-11	15.048
GOBP_REGULATION_OF_SKELETAL_MUSCLE_CELL_DIFFERENTIATION	-0.125619	-0.0215316	-6.83189	2.36442e-11	6.92286e-11	14.8997
GOBP_IMMATURE_B_CELL_DIFFERENTIATION	-0.190911	-0.0351764	-6.8306	2.38397e-11	6.9762e-11	14.8917
GOBP_OPTIC_NERVE_DEVELOPMENT	-0.135472	-0.0348496	-6.82961	2.3991e-11	7.01657e-11	14.8855
GOBP_POSITIVE_REGULATION_OF_INTERFERON_BETA_PRODUCTION	-0.198979	-0.0450739	-6.82481	2.47386e-11	7.23119e-11	14.8555
GOBP_EPITHELIAL_CELL_DEVELOPMENT	-0.10675	-0.030371	-6.82245	2.51149e-11	7.33709e-11	14.8407
GOBP_CARNITINE_METABOLIC_PROCESS	-0.183153	-0.0437085	-6.82226	2.5146e-11	7.34208e-11	14.8395
GOBP_RESPONSE_TO_INTERFERON_ALPHA	-0.217837	-0.045193	-6.81904	2.56672e-11	7.49009e-11	14.8194
GOBP_NEURON_PROJECTION_ARBORIZATION	-0.14066	-0.0397848	-6.81739	2.59399e-11	7.56543e-11	14.8091
GOBP_ACTIN_CYTOSKELETON_REORGANIZATION	-0.117402	-0.0324872	-6.81319	2.66439e-11	7.76644e-11	14.7829
GOBP_SPHINGOMYELIN_BIOSYNTHETIC_PROCESS	-0.226983	-0.0302056	-6.81254	2.67549e-11	7.79448e-11	14.7788
GOBP_REGULATION_OF_MICROTUBULE_POLYMERIZATION	-0.148835	-0.0387013	-6.8108	2.70538e-11	7.87717e-11	14.768
GOBP_AROMATIC_AMINO_ACID_TRANSPORT	-0.188332	-0.0326143	-6.80867	2.74234e-11	7.98035e-11	14.7547
GOBP_POLYSACCHARIDE_BIOSYNTHETIC_PROCESS	-0.124786	-0.0342321	-6.80535	2.80106e-11	8.14671e-11	14.734
GOBP_CRANIAL_NERVE_STRUCTURAL_ORGANIZATION	-0.177751	-0.00936752	-6.80392	2.82673e-11	8.2168e-11	14.7251
GOBP_TRNA_5_END_PROCESSING	-0.209453	-0.0546892	-6.80009	2.89649e-11	8.41492e-11	14.7012
GOBP_POSITIVE_REGULATION_OF_GLUCONEOGENESIS	-0.141297	-0.0170841	-6.79908	2.9152e-11	8.46458e-11	14.695
GOBP_REGULATION_OF_POSTSYNAPSE_ORGANIZATION	-0.15893	-0.0374735	-6.7886	3.11643e-11	9.04386e-11	14.6297
GOBP_CDP_DIACYLGLYCEROL_METABOLIC_PROCESS	-0.164504	-0.0378496	-6.78788	3.1306e-11	9.07996e-11	14.6253
GOBP_AORTA_DEVELOPMENT	-0.121557	-0.0333355	-6.78691	3.15009e-11	9.13143e-11	14.6192
GOBP_NEGATIVE_REGULATION_OF_REACTIVE_OXYGEN_SPECIES_BIOSYNTHETIC_PROCESS	-0.14596	-0.0244691	-6.78605	3.16733e-11	9.17632e-11	14.6139
GOBP_NEUROTROPHIN_TRK_RECEPTOR_SIGNALING_PATHWAY	-0.131467	-0.0297017	-6.78325	3.22421e-11	9.33597e-11	14.5965
GOBP_NEGATIVE_REGULATION_OF_LIPOPROTEIN_PARTICLE_CLEARANCE	0.127303	0.00846929	6.78015	3.2883e-11	9.51626e-11	14.5772
GOBP_SINGLE_STRANDED_VIRAL_RNA_REPLICATION_VIA_DOUBLE_STRANDED_DNA_INTERMEDIATE	-0.177012	-0.0253551	-6.77943	3.30352e-11	9.55505e-11	14.5727
GOBP_REGULATION_OF_DENDRITE_MORPHOGENESIS	-0.164995	-0.0408759	-6.7659	3.5999e-11	1.04066e-10	14.4887
GOBP_SPLICEOSOMAL_SNRNP_ASSEMBLY	-0.182115	-0.0421104	-6.76506	3.61918e-11	1.04565e-10	14.4835
GOBP_LAYER_FORMATION_IN_CEREBRAL_CORTEX	-0.233332	-0.0502339	-6.75547	3.84594e-11	1.11056e-10	14.4241
GOBP_CELLULAR_TRANSITION_METAL_ION_HOMEOSTASIS	-0.101682	-0.0409183	-6.75251	3.91888e-11	1.13099e-10	14.4057
GOBP_SIGNALING_RECEPTOR_LIGAND_PRECURSOR_PROCESSING	-0.125718	-0.0409663	-6.751	3.95655e-11	1.14124e-10	14.3964
GOBP_CERAMIDE_METABOLIC_PROCESS	-0.103574	-0.0439185	-6.74844	4.0211e-11	1.15922e-10	14.3806
GOBP_REGULATION_OF_NUCLEAR_TRANSCRIBED_MRNA_CATABOLIC_PROCESS_NONSENSE_MEDIATED_DECAY	-0.222924	-0.0291227	-6.74792	4.0343e-11	1.16238e-10	14.3774
GOBP_CELL_PROLIFERATION_IN_FOREBRAIN	-0.121162	-0.0233401	-6.74628	4.0765e-11	1.1739e-10	14.3672
GOBP_MATERNAL_PLACENTA_DEVELOPMENT	-0.130174	-0.0326791	-6.74116	4.2108e-11	1.2119e-10	14.3355
GOBP_GANGLION_DEVELOPMENT	-0.146492	-0.0153489	-6.73978	4.24781e-11	1.22189e-10	14.3269
GOBP_TRNA_THREONYLCARBAMOYLADENOSINE_METABOLIC_PROCESS	-0.20263	-0.0258433	-6.73651	4.33656e-11	1.24673e-10	14.3067
GOBP_NEGATIVE_REGULATION_OF_VIRAL_TRANSCRIPTION	-0.167497	-0.0535053	-6.73261	4.44471e-11	1.27712e-10	14.2827
GOBP_REGULATION_OF_MICROTUBULE_DEPOLYMERIZATION	-0.180216	-0.029394	-6.72963	4.52906e-11	1.30065e-10	14.2643
GOBP_WNT_SIGNALING_PATHWAY_INVOLVED_IN_MIDBRAIN_DOPAMINERGIC_NEURON_DIFFERENTIATION	-0.177305	-0.0176193	-6.72555	4.64755e-11	1.33394e-10	14.2391
GOBP_ESTABLISHMENT_OF_CENTROSOME_LOCALIZATION	-0.158664	-0.0259015	-6.72495	4.66514e-11	1.33826e-10	14.2354
GOBP_N_ACETYLNEURAMINATE_METABOLIC_PROCESS	-0.18222	-0.0469964	-6.72328	4.71454e-11	1.35169e-10	14.2251
GOBP_POSITIVE_REGULATION_OF_HUMORAL_IMMUNE_RESPONSE	0.14857	0.0271082	6.72258	4.73533e-11	1.35691e-10	14.2208
GOBP_POSITIVE_REGULATION_OF_NEUROBLAST_PROLIFERATION	-0.137947	-0.0155566	-6.72195	4.75419e-11	1.36157e-10	14.2169
GOBP_HISTONE_H3_K14_ACETYLATION	-0.195008	-0.0275837	-6.71588	4.93983e-11	1.41396e-10	14.1794
GOBP_KILLING_BY_HOST_OF_SYMBIONT_CELLS	0.143922	0.0295202	6.71315	5.02564e-11	1.43774e-10	14.1626
GOBP_CELL_VOLUME_HOMEOSTASIS	-0.112264	-0.0316526	-6.71059	5.10751e-11	1.46036e-10	14.1468
GOBP_PYRIMIDINE_RIBONUCLEOTIDE_METABOLIC_PROCESS	-0.123244	-0.0501104	-6.70791	5.19446e-11	1.48441e-10	14.1303
GOBP_POSITIVE_REGULATION_OF_FIBROBLAST_MIGRATION	-0.181109	-0.0323943	-6.69679	5.57123e-11	1.59122e-10	14.0619
GOBP_HOMEOSTASIS_OF_NUMBER_OF_CELLS_WITHIN_A_TISSUE	-0.134291	-0.0317978	-6.69351	5.68749e-11	1.62354e-10	14.0417
GOBP_OLFACTORY_LOBE_DEVELOPMENT	-0.139577	-0.0258745	-6.69265	5.71816e-11	1.6314e-10	14.0365
GOBP_REGULATION_OF_SYNAPTIC_VESICLE_RECYCLING	-0.201293	-0.039796	-6.68704	5.92372e-11	1.68847e-10	14.002
GOBP_UMP_BIOSYNTHETIC_PROCESS	-0.169161	-0.0494086	-6.66849	6.65542e-11	1.89365e-10	13.8882
GOBP_VESICLE_DOCKING	-0.119664	-0.0434649	-6.6665	6.73918e-11	1.91644e-10	13.876
GOBP_CELL_PROLIFERATION_INVOLVED_IN_HEART_MORPHOGENESIS	-0.160996	-0.0101915	-6.66289	6.89313e-11	1.95916e-10	13.8539
GOBP_MESENCHYMAL_STEM_CELL_DIFFERENTIATION	-0.18169	-0.0275163	-6.65927	7.05129e-11	2.00302e-10	13.8317
GOBP_AMINO_SUGAR_METABOLIC_PROCESS	-0.111292	-0.0359758	-6.65584	7.20474e-11	2.04551e-10	13.8107
GOBP_CHROMATIN_REMODELING_AT_CENTROMERE	-0.248476	-0.0518187	-6.6547	7.25625e-11	2.05902e-10	13.8037
GOBP_RETINOL_METABOLIC_PROCESS	0.101807	-0.0248918	6.65407	7.28467e-11	2.06516e-10	13.7999
GOBP_NUCLEOSIDE_DIPHOSPHATE_CATABOLIC_PROCESS	-0.163767	-0.0436672	-6.65405	7.28579e-11	2.06516e-10	13.7998
GOBP_NUCLEOTIDE_TRANSPORT	-0.106368	-0.0433915	-6.65165	7.39594e-11	2.09525e-10	13.7851
GOBP_EMBRYONIC_HEART_TUBE_MORPHOGENESIS	-0.100733	-0.0291774	-6.64973	7.48533e-11	2.11943e-10	13.7734
GOBP_POSITIVE_REGULATION_OF_I_KAPPAB_KINASE_NF_KAPPAB_SIGNALING	-0.155489	-0.0435485	-6.64719	7.60522e-11	2.15221e-10	13.7579
GOBP_DETECTION_OF_MECHANICAL_STIMULUS_INVOLVED_IN_SENSORY_PERCEPTION	0.136704	-0.0207138	6.64251	7.83128e-11	2.2138e-10	13.7292
GOBP_MEIOSIS_I_CELL_CYCLE_PROCESS	-0.117797	-0.0360275	-6.64149	7.88125e-11	2.22432e-10	13.723
GOBP_CHONDROITIN_SULFATE_BIOSYNTHETIC_PROCESS	-0.163936	-0.0495184	-6.64031	7.93971e-11	2.23961e-10	13.7158
GOBP_POSITIVE_REGULATION_OF_ANION_TRANSMEMBRANE_TRANSPORT	-0.174672	-0.0212453	-6.63968	7.97107e-11	2.24725e-10	13.712
GOBP_SPINDLE_ELONGATION	-0.227486	-0.0516541	-6.62948	8.49541e-11	2.3925e-10	13.6497
GOBP_PROTEIN_LOCALIZATION_TO_NON_MOTILE_CILIUM	-0.150876	-0.0340803	-6.62654	8.65282e-11	2.43552e-10	13.6318
GOBP_SERTOLI_CELL_DEVELOPMENT	-0.146026	-0.0197922	-6.61482	9.30886e-11	2.61877e-10	13.5604
GOBP_NEGATIVE_REGULATION_OF_LEUKOCYTE_ADHESION_TO_VASCULAR_ENDOTHELIAL_CELL	0.181503	0.0277174	6.6123	9.45618e-11	2.65879e-10	13.5451
GOBP_INTRINSIC_APOPTOTIC_SIGNALING_PATHWAY_IN_RESPONSE_TO_DNA_DAMAGE_BY_P53_CLASS_MEDIATOR	-0.149708	-0.0429686	-6.60686	9.78224e-11	2.74899e-10	13.512
GOBP_PHAGOCYTOSIS_RECOGNITION	0.150844	0.0112361	6.60081	1.01576e-10	2.85141e-10	13.4752
GOBP_GLUCAN_BIOSYNTHETIC_PROCESS	-0.120167	-0.033885	-6.59893	1.02768e-10	2.88334e-10	13.4638
GOBP_XENOPHAGY	-0.18819	-0.0444331	-6.59081	1.08092e-10	3.03018e-10	13.4145
GOBP_LABYRINTHINE_LAYER_DEVELOPMENT	-0.112015	-0.0283795	-6.59077	1.08117e-10	3.03018e-10	13.4143
GOBP_RADIAL_GLIAL_CELL_DIFFERENTIATION	-0.162595	-0.0317551	-6.58578	1.11522e-10	3.12227e-10	13.384
GOBP_NEGATIVE_REGULATION_OF_INTERLEUKIN_1_PRODUCTION	0.152486	-0.00863555	6.58548	1.11731e-10	3.12644e-10	13.3822
GOBP_RESPONSE_TO_WATER	-0.129767	-0.0250688	-6.58001	1.15587e-10	3.23262e-10	13.349
GOBP_POSITIVE_REGULATION_OF_ACTIN_NUCLEATION	-0.163074	-0.0415188	-6.57022	1.22823e-10	3.43131e-10	13.2897
GOBP_REGULATION_OF_ACTIN_FILAMENT_LENGTH	-0.110383	-0.0418269	-6.56973	1.23195e-10	3.43989e-10	13.2868
GOBP_MANGANESE_ION_TRANSPORT	-0.158055	-0.0364344	-6.56738	1.25005e-10	3.48671e-10	13.2725
GOBP_MODULATION_OF_PROCESS_OF_ANOTHER_ORGANISM	0.158558	0.0347935	6.56003	1.30821e-10	3.64699e-10	13.2281
GOBP_CEREBELLAR_CORTEX_MORPHOGENESIS	-0.154867	-0.0257767	-6.55035	1.38901e-10	3.86875e-10	13.1696
GOBP_SEBACEOUS_GLAND_DEVELOPMENT	-0.157756	-0.00443891	-6.55032	1.38924e-10	3.86875e-10	13.1695
GOBP_REGULATION_OF_ACTOMYOSIN_STRUCTURE_ORGANIZATION	-0.117206	-0.0358769	-6.54549	1.4313e-10	3.98165e-10	13.1404
GOBP_CEREBELLAR_PURKINJE_CELL_LAYER_MORPHOGENESIS	-0.158962	-0.0318971	-6.54506	1.43516e-10	3.99028e-10	13.1377
GOBP_DETECTION_OF_LIGHT_STIMULUS_INVOLVED_IN_SENSORY_PERCEPTION	0.105553	-0.0102056	6.54479	1.43751e-10	3.99468e-10	13.1361
GOBP_VENTRICULAR_CARDIAC_MUSCLE_CELL_DIFFERENTIATION	-0.163346	-0.0164271	-6.53958	1.48455e-10	4.12104e-10	13.1047
GOBP_NEGATIVE_REGULATION_OF_ACTIN_FILAMENT_DEPOLYMERIZATION	-0.128466	-0.0401322	-6.5385	1.49451e-10	4.1465e-10	13.0982
GOBP_CHROMATIN_DISASSEMBLY	-0.198399	-0.0260481	-6.53671	1.51106e-10	4.19019e-10	13.0874
GOBP_REGULATION_OF_FIBRINOLYSIS	0.154973	-0.0155005	6.52812	1.59332e-10	4.4113e-10	13.0357
GOBP_NUCLEOBASE_CONTAINING_SMALL_MOLECULE_BIOSYNTHETIC_PROCESS	-0.154702	-0.0377542	-6.52548	1.61944e-10	4.48124e-10	13.0198
GOBP_GLYCOSPHINGOLIPID_METABOLIC_PROCESS	-0.120492	-0.044333	-6.51334	1.74523e-10	4.82679e-10	12.9468
GOBP_PROTEIN_HETEROOLIGOMERIZATION	-0.135625	-0.0289139	-6.50824	1.80082e-10	4.9779e-10	12.9162
GOBP_MITOCHONDRIAL_CYTOCHROME_C_OXIDASE_ASSEMBLY	-0.216229	-0.042178	-6.5051	1.83594e-10	5.07117e-10	12.8973
GOBP_GLIAL_CELL_DERIVED_NEUROTROPHIC_FACTOR_RECEPTOR_SIGNALING_PATHWAY	0.157759	0.0171244	6.50505	1.8365e-10	5.07117e-10	12.897
GOBP_HISTONE_H3_K9_DEMETHYLATION	-0.229976	-0.031105	-6.50379	1.85081e-10	5.10801e-10	12.8895
GOBP_PENTOSE_PHOSPHATE_SHUNT	-0.188027	-0.0488651	-6.50007	1.89361e-10	5.22339e-10	12.8672
GOBP_LIPID_TRANSLOCATION	-0.116899	-0.0398959	-6.49964	1.89863e-10	5.23447e-10	12.8646
GOBP_MDA_5_SIGNALING_PATHWAY	-0.200564	-0.059471	-6.494	1.96547e-10	5.41305e-10	12.8308
GOBP_REGULATION_OF_AXON_GUIDANCE	-0.168838	-0.0278753	-6.49009	2.0133e-10	5.54187e-10	12.8073
GOBP_SPHINGOSINE_BIOSYNTHETIC_PROCESS	-0.161203	-0.0454618	-6.48927	2.02346e-10	5.5669e-10	12.8024
GOBP_SIGNAL_PEPTIDE_PROCESSING	-0.214178	-0.0471919	-6.48257	2.10825e-10	5.79714e-10	12.7624
GOBP_TRANSITION_METAL_ION_HOMEOSTASIS	-0.100022	-0.0399975	-6.48178	2.11852e-10	5.82232e-10	12.7576
GOBP_PEROXISOME_FISSION	-0.184351	-0.0426124	-6.47859	2.16033e-10	5.93412e-10	12.7386
GOBP_LEUKOTRIENE_METABOLIC_PROCESS	0.150555	-0.0273127	6.47723	2.17846e-10	5.98079e-10	12.7304
GOBP_RESPONSE_TO_MERCURY_ION	0.166474	-0.00463248	6.47446	2.21572e-10	6.0799e-10	12.7139
GOBP_RESPONSE_TO_PLATELET_DERIVED_GROWTH_FACTOR	-0.165439	-0.0255547	-6.46806	2.30426e-10	6.31953e-10	12.6756
GOBP_INTRACILIARY_RETROGRADE_TRANSPORT	-0.219576	-0.0390452	-6.46618	2.33097e-10	6.38944e-10	12.6644
GOBP_BRANCHED_CHAIN_AMINO_ACID_METABOLIC_PROCESS	-0.157784	-0.0410893	-6.45952	2.42785e-10	6.65152e-10	12.6246
GOBP_BIOLOGICAL_PROCESS_INVOLVED_IN_INTERACTION_WITH_SYMBIONT	-0.10135	-0.0205667	-6.45444	2.5044e-10	6.85767e-10	12.5944
GOBP_POSITIVE_REGULATION_OF_NUCLEOTIDE_BIOSYNTHETIC_PROCESS	0.114718	-0.0114932	6.44777	2.60846e-10	7.13887e-10	12.5546
GOBP_POSITIVE_REGULATION_OF_NITRIC_OXIDE_SYNTHASE_ACTIVITY	-0.124788	-0.0118275	-6.44606	2.63587e-10	7.20635e-10	12.5444
GOBP_RETINA_VASCULATURE_DEVELOPMENT_IN_CAMERA_TYPE_EYE	-0.168503	-0.0342668	-6.44593	2.63801e-10	7.20844e-10	12.5437
GOBP_INTRACELLULAR_STEROL_TRANSPORT	-0.12524	-0.0375176	-6.44034	2.72943e-10	7.45438e-10	12.5104
GOBP_PLASMA_MEMBRANE_REPAIR	-0.146806	-0.0405506	-6.42256	3.04168e-10	8.29851e-10	12.4048
GOBP_POSITIVE_REGULATION_OF_CARDIAC_MUSCLE_CELL_DIFFERENTIATION	0.135107	0.000288634	6.42111	3.06864e-10	8.36772e-10	12.3961
GOBP_NEGATIVE_REGULATION_OF_PEPTIDYL_LYSINE_ACETYLATION	-0.139036	-0.0422198	-6.41618	3.16216e-10	8.61824e-10	12.3669
GOBP_AMYLOID_BETA_METABOLIC_PROCESS	-0.116463	-0.0325321	-6.41427	3.1991e-10	8.71438e-10	12.3555
GOBP_3_UTR_MEDIATED_MRNA_DESTABILIZATION	-0.177075	-0.0426707	-6.41313	3.22126e-10	8.77018e-10	12.3488
GOBP_ACTIVATION_OF_INNATE_IMMUNE_RESPONSE	-0.168136	-0.0319489	-6.40941	3.29486e-10	8.96593e-10	12.3268
GOBP_RESPONSE_TO_PROSTAGLANDIN_E	-0.126906	-0.0407427	-6.4091	3.30126e-10	8.97868e-10	12.3249
GOBP_NEGATIVE_REGULATION_OF_CHOLESTEROL_EFFLUX	0.12727	0.0306562	6.40665	3.35071e-10	9.1078e-10	12.3104
GOBP_RESPONSE_TO_VITAMIN_E	-0.13957	-0.0358095	-6.40592	3.36547e-10	9.13908e-10	12.3061
GOBP_TROPHOBLAST_GIANT_CELL_DIFFERENTIATION	-0.138033	-0.025952	-6.40381	3.40898e-10	9.25245e-10	12.2936
GOBP_TRANSCYTOSIS	-0.124685	-0.0370315	-6.39846	3.52141e-10	9.55265e-10	12.2619
GOBP_IRON_ION_HOMEOSTASIS	-0.100106	-0.0355599	-6.39667	3.55983e-10	9.65186e-10	12.2513
GOBP_POSITIVE_REGULATION_OF_PROTEIN_LOCALIZATION_TO_CELL_SURFACE	-0.100327	-0.0338246	-6.39331	3.6331e-10	9.84543e-10	12.2315
GOBP_PHAGOLYSOSOME_ASSEMBLY	-0.144671	-0.034775	-6.39252	3.65061e-10	9.88401e-10	12.2268
GOBP_NOTCH_SIGNALING_INVOLVED_IN_HEART_DEVELOPMENT	-0.153403	-0.0334078	-6.3925	3.6511e-10	9.88401e-10	12.2266
GOBP_CENTRAL_NERVOUS_SYSTEM_NEURON_DEVELOPMENT	-0.132076	-0.0386106	-6.38763	3.76048e-10	1.01748e-09	12.1978
GOBP_KILLING_OF_CELLS_OF_ANOTHER_ORGANISM	0.133588	0.0357973	6.38312	3.86462e-10	1.04512e-09	12.1712
GOBP_GLOMERULAR_EPITHELIAL_CELL_DIFFERENTIATION	-0.124253	-0.0199751	-6.38226	3.88481e-10	1.0495e-09	12.1661
GOBP_SUBSTRATE_ADHESION_DEPENDENT_CELL_SPREADING	-0.122026	-0.0407947	-6.38023	3.93269e-10	1.06189e-09	12.1542
GOBP_SPHINGOLIPID_METABOLIC_PROCESS	-0.104941	-0.0404276	-6.37686	4.01366e-10	1.08319e-09	12.1343
GOBP_REGULATION_OF_RESPONSE_TO_FOOD	0.146831	-0.0136168	6.3752	4.05438e-10	1.09362e-09	12.1245
GOBP_POSITIVE_REGULATION_OF_MUSCLE_TISSUE_DEVELOPMENT	-0.114538	-0.0145654	-6.37432	4.07581e-10	1.09883e-09	12.1193
GOBP_INTESTINAL_EPITHELIAL_CELL_DIFFERENTIATION	-0.104732	-0.0167741	-6.37015	4.18009e-10	1.12637e-09	12.0947
GOBP_RESPIRATORY_CHAIN_COMPLEX_IV_ASSEMBLY	-0.193233	-0.0437395	-6.36809	4.23228e-10	1.13926e-09	12.0826
GOBP_DICARBOXYLIC_ACID_METABOLIC_PROCESS	-0.101607	-0.0337611	-6.36627	4.27911e-10	1.15127e-09	12.0719
GOBP_RESPONSE_TO_TYPE_I_INTERFERON	-0.165362	-0.0444392	-6.3557	4.56132e-10	1.22657e-09	12.0096
GOBP_AXON_DEVELOPMENT	-0.110808	-0.0318239	-6.34684	4.81157e-10	1.2932e-09	11.9575
GOBP_INOSITOL_METABOLIC_PROCESS	-0.16255	-0.0476683	-6.34093	4.98583e-10	1.33935e-09	11.9228
GOBP_NEGATIVE_REGULATION_OF_CELL_ADHESION_MEDIATED_BY_INTEGRIN	-0.168308	-0.0305358	-6.33821	5.06835e-10	1.36082e-09	11.9068
GOBP_RNA_SURVEILLANCE	-0.219257	-0.0447001	-6.33597	5.13698e-10	1.37854e-09	11.8937
GOBP_NEGATIVE_REGULATION_OF_PROTEIN_LOCALIZATION_TO_MEMBRANE	-0.132825	-0.0394136	-6.33363	5.20996e-10	1.39741e-09	11.88
GOBP_REGULATION_OF_ENDOTHELIAL_CELL_DEVELOPMENT	-0.154336	-0.0425123	-6.32937	5.34516e-10	1.43294e-09	11.855
GOBP_UV_PROTECTION	-0.176138	-0.0459828	-6.32835	5.37801e-10	1.44055e-09	11.849
GOBP_EPINEPHRINE_TRANSPORT	0.200834	-0.0112652	6.32832	5.37903e-10	1.44055e-09	11.8488
GOBP_LIPOXYGENASE_PATHWAY	0.160846	-0.0213584	6.32421	5.51356e-10	1.47582e-09	11.8248
GOBP_RESPONSE_TO_COBALT_ION	-0.150319	-0.0325999	-6.32267	5.56495e-10	1.48882e-09	11.8157
GOBP_STABILIZATION_OF_MEMBRANE_POTENTIAL	0.188145	-0.0220139	6.32246	5.572e-10	1.48994e-09	11.8145
GOBP_FILOPODIUM_ASSEMBLY	-0.113492	-0.0403072	-6.31246	5.9165e-10	1.58045e-09	11.756
GOBP_INNER_EAR_RECEPTOR_CELL_STEREOCILIUM_ORGANIZATION	0.103214	-0.0273099	6.30503	6.1861e-10	1.64994e-09	11.7126
GOBP_POSITIVE_REGULATION_OF_FEEDING_BEHAVIOR	0.159077	-0.0180667	6.30344	6.24553e-10	1.66495e-09	11.7032
GOBP_POSITIVE_REGULATION_OF_CALCIUM_ION_IMPORT	0.140912	-0.0124023	6.30033	6.3631e-10	1.69456e-09	11.6851
GOBP_ADP_METABOLIC_PROCESS	-0.102014	-0.0397006	-6.29868	6.42636e-10	1.71054e-09	11.6754
GOBP_POSITIVE_REGULATION_OF_BROWN_FAT_CELL_DIFFERENTIATION	-0.128205	-0.0373638	-6.29792	6.45548e-10	1.71742e-09	11.671
GOBP_NAD_BIOSYNTHESIS_VIA_NICOTINAMIDE_RIBOSIDE_SALVAGE_PATHWAY	-0.142588	-0.0304155	-6.2965	6.51047e-10	1.73117e-09	11.6628
GOBP_COMPLEMENT_ACTIVATION_ALTERNATIVE_PATHWAY	0.14541	0.00533943	6.28307	7.05548e-10	1.87514e-09	11.5844
GOBP_POSITIVE_REGULATION_OF_GLYCOLYTIC_PROCESS	-0.148351	-0.0245191	-6.28152	7.1211e-10	1.89162e-09	11.5754
GOBP_REGULATION_OF_INTESTINAL_ABSORPTION	0.146927	-0.0222756	6.2777	7.28563e-10	1.93337e-09	11.5531
GOBP_NEGATIVE_REGULATION_OF_ENDOPLASMIC_RETICULUM_STRESS_INDUCED_INTRINSIC_APOPTOTIC_SIGNALING_PATHWAY	-0.160955	-0.0320215	-6.27389	7.453e-10	1.97578e-09	11.531
GOBP_IMMUNOGLOBULIN_PRODUCTION_INVOLVED_IN_IMMUNOGLOBULIN_MEDIATED_IMMUNE_RESPONSE	-0.161245	-0.0483753	-6.26187	8.00726e-10	2.12057e-09	11.4611
GOBP_RIBOSOMAL_SMALL_SUBUNIT_BIOGENESIS	-0.213636	-0.0257955	-6.2571	8.23808e-10	2.18059e-09	11.4334
GOBP_NUCLEOTIDE_BINDING_DOMAIN_LEUCINE_RICH_REPEAT_CONTAINING_RECEPTOR_SIGNALING_PATHWAY	-0.172898	-0.0326556	-6.25375	8.40434e-10	2.22348e-09	11.4139
GOBP_MOTOR_NEURON_APOPTOTIC_PROCESS	-0.181267	-0.036469	-6.24303	8.95773e-10	2.3663e-09	11.3518
GOBP_NATURAL_KILLER_CELL_ACTIVATION_INVOLVED_IN_IMMUNE_RESPONSE	0.122251	-0.00500231	6.24109	9.06157e-10	2.39253e-09	11.3406
GOBP_POSITIVE_REGULATION_OF_BLOOD_VESSEL_ENDOTHELIAL_CELL_MIGRATION	-0.117525	-0.0281855	-6.23907	9.17127e-10	2.42027e-09	11.3289
GOBP_REGULATION_OF_PATTERN_RECOGNITION_RECEPTOR_SIGNALING_PATHWAY	-0.140195	-0.0333509	-6.2374	9.26293e-10	2.44323e-09	11.3192
GOBP_SPINAL_CORD_MOTOR_NEURON_DIFFERENTIATION	-0.127175	-0.00329727	-6.23259	9.53109e-10	2.51143e-09	11.2914
GOBP_MRNA_CIS_SPLICING_VIA_SPLICEOSOME	-0.144845	-0.0310445	-6.23063	9.64275e-10	2.53958e-09	11.28
GOBP_CEREBELLAR_CORTEX_FORMATION	-0.175824	-0.0233612	-6.23003	9.67727e-10	2.54739e-09	11.2765
GOBP_NEGATIVE_REGULATION_OF_VASCULAR_ENDOTHELIAL_GROWTH_FACTOR_PRODUCTION	0.131956	0.0792929	6.22973	9.69441e-10	2.55062e-09	11.2748
GOBP_CEREBRAL_CORTEX_GABAERGIC_INTERNEURON_DIFFERENTIATION	0.204944	-0.0196239	6.22277	1.01031e-09	2.65549e-09	11.2346
GOBP_CELLULAR_RESPONSE_TO_ALDEHYDE	-0.141542	-0.0438426	-6.22007	1.02664e-09	2.69706e-09	11.219
GOBP_REGULATION_OF_KERATINOCYTE_DIFFERENTIATION	-0.10396	-0.0175008	-6.21985	1.02794e-09	2.69912e-09	11.2177
GOBP_REGULATION_OF_CELL_PROJECTION_SIZE	0.161191	-0.0232473	6.21366	1.06638e-09	2.79866e-09	11.182
GOBP_NEGATIVE_REGULATION_OF_PROTEIN_LOCALIZATION_TO_CELL_SURFACE	-0.165613	-0.0299675	-6.20764	1.10507e-09	2.89584e-09	11.1473
GOBP_GLIAL_CELL_APOPTOTIC_PROCESS	-0.148273	-0.044312	-6.19797	1.17016e-09	3.06333e-09	11.0915
GOBP_NEGATIVE_REGULATION_OF_ACTIN_FILAMENT_POLYMERIZATION	-0.110444	-0.0422883	-6.19162	1.21489e-09	3.17726e-09	11.055
GOBP_EYELID_DEVELOPMENT_IN_CAMERA_TYPE_EYE	-0.158864	-0.0197516	-6.18998	1.22672e-09	3.20661e-09	11.0456
GOBP_FACIAL_NERVE_MORPHOGENESIS	-0.161057	-0.0170314	-6.18958	1.22964e-09	3.21262e-09	11.0433
GOBP_MYELOID_CELL_DEVELOPMENT	-0.11179	-0.0346145	-6.18686	1.24948e-09	3.26283e-09	11.0277
GOBP_GROWTH_PLATE_CARTILAGE_CHONDROCYTE_DIFFERENTIATION	-0.151254	-0.049253	-6.18653	1.25191e-09	3.26756e-09	11.0258
GOBP_THIOESTER_METABOLIC_PROCESS	-0.113604	-0.0362256	-6.18473	1.26533e-09	3.30093e-09	11.0154
GOBP_POSTSYNAPTIC_MEMBRANE_ASSEMBLY	-0.206034	-0.0279403	-6.18108	1.29287e-09	3.37111e-09	10.9944
GOBP_REGULATION_OF_HISTONE_H3_K27_METHYLATION	-0.187225	-0.0363961	-6.18006	1.30064e-09	3.3897e-09	10.9886
GOBP_RESPONSE_TO_FLUID_SHEAR_STRESS	-0.116131	-0.0393683	-6.17945	1.30534e-09	3.40024e-09	10.9851
GOBP_DEFENSE_RESPONSE_TO_SYMBIONT	-0.133233	-0.0338033	-6.1775	1.32042e-09	3.43781e-09	10.9739
GOBP_POSITIVE_REGULATION_OF_ACTIVATED_T_CELL_PROLIFERATION	0.139101	-0.0134989	6.17151	1.36792e-09	3.55971e-09	10.9395
GOBP_POSITIVE_REGULATION_OF_TRANSCRIPTION_FROM_RNA_POLYMERASE_II_PROMOTER_IN_RESPONSE_TO_ENDOPLASMIC_RETICULUM_STRESS	-0.171618	-0.0320233	-6.16822	1.39463e-09	3.62561e-09	10.9206
GOBP_VITAMIN_CATABOLIC_PROCESS	0.148624	-0.00455478	6.16666	1.40752e-09	3.65731e-09	10.9117
GOBP_RESPONSE_TO_SELENIUM_ION	0.192206	-0.0317036	6.15701	1.48977e-09	3.86913e-09	10.8564
GOBP_ADENOHYPOPHYSIS_DEVELOPMENT	0.135317	0.0093753	6.14988	1.55354e-09	4.03076e-09	10.8156
GOBP_KETONE_CATABOLIC_PROCESS	0.18121	-0.0360516	6.13829	1.66285e-09	4.31222e-09	10.7494
GOBP_REGULATION_OF_IMMUNOGLOBULIN_PRODUCTION	-0.117384	-0.0338793	-6.13573	1.68804e-09	4.37323e-09	10.7347
GOBP_CRANIOFACIAL_SUTURE_MORPHOGENESIS	-0.136093	-0.0191687	-6.13531	1.69223e-09	4.3819e-09	10.7323
GOBP_NEGATIVE_REGULATION_OF_FIBRINOLYSIS	0.14521	-0.00705106	6.13305	1.71475e-09	4.43803e-09	10.7195
GOBP_NON_CANONICAL_WNT_SIGNALING_PATHWAY	-0.108044	-0.022838	-6.13005	1.74517e-09	4.51452e-09	10.7024
GOBP_SERINE_FAMILY_AMINO_ACID_BIOSYNTHETIC_PROCESS	-0.150779	-0.0220496	-6.12573	1.78993e-09	4.62804e-09	10.6777
GOBP_RETINAL_METABOLIC_PROCESS	0.11613	-0.010268	6.11778	1.87517e-09	4.84365e-09	10.6324
GOBP_RENAL_SODIUM_ION_TRANSPORT	0.146766	-0.0294448	6.11443	1.91224e-09	4.93697e-09	10.6134
GOBP_POSITIVE_REGULATION_OF_IMMUNOGLOBULIN_PRODUCTION	-0.124658	-0.036962	-6.10966	1.9663e-09	5.07154e-09	10.5862
GOBP_REGULATION_OF_FLAGELLATED_SPERM_MOTILITY	0.12895	-0.00154184	6.10816	1.98362e-09	5.1137e-09	10.5777
GOBP_HUMORAL_IMMUNE_RESPONSE_MEDIATED_BY_CIRCULATING_IMMUNOGLOBULIN	0.150936	0.00331216	6.09967	2.08438e-09	5.36818e-09	10.5295
GOBP_REGULATION_OF_ANION_TRANSMEMBRANE_TRANSPORT	-0.124221	-0.0297639	-6.09827	2.10147e-09	5.40954e-09	10.5215
GOBP_NEGATIVE_REGULATION_OF_DENDRITIC_SPINE_DEVELOPMENT	-0.167658	-0.0379541	-6.09529	2.13839e-09	5.50186e-09	10.5046
GOBP_POSITIVE_REGULATION_OF_PROTEIN_TARGETING_TO_MEMBRANE	-0.116961	-0.0455884	-6.08689	2.24571e-09	5.77232e-09	10.4569
GOBP_REGULATION_OF_EXCRETION	0.118925	-0.0141521	6.07898	2.35144e-09	6.03816e-09	10.4122
GOBP_EXIT_FROM_MITOSIS	-0.134135	-0.0410057	-6.07876	2.3545e-09	6.04305e-09	10.4109
GOBP_CORTICAL_ACTIN_CYTOSKELETON_ORGANIZATION	-0.141817	-0.0483985	-6.07706	2.37797e-09	6.10031e-09	10.4012
GOBP_POSITIVE_REGULATION_OF_DIGESTIVE_SYSTEM_PROCESS	0.137947	-0.0191181	6.06964	2.48268e-09	6.36582e-09	10.3593
GOBP_CEREBELLAR_PURKINJE_CELL_LAYER_FORMATION	-0.178632	-0.0291798	-6.06037	2.62003e-09	6.7147e-09	10.3069
GOBP_CARBOHYDRATE_DERIVATIVE_TRANSPORT	-0.111043	-0.0411548	-6.0501	2.78095e-09	7.12364e-09	10.2489
GOBP_CYTOPLASMIC_SEQUESTERING_OF_TRANSCRIPTION_FACTOR	-0.142836	-0.047519	-6.04493	2.86543e-09	7.33286e-09	10.2198
GOBP_CARDIAC_ATRIUM_MORPHOGENESIS	-0.118142	-0.00538382	-6.04298	2.89794e-09	7.41246e-09	10.2088
GOBP_TUBULIN_DEACETYLATION	-0.154913	-0.0355743	-6.04127	2.92683e-09	7.48269e-09	10.1992
GOBP_CELLULAR_RESPONSE_TO_ATP	-0.111397	-0.040924	-6.03914	2.96317e-09	7.5719e-09	10.1872
GOBP_ESTABLISHMENT_OF_ENDOTHELIAL_BARRIER	-0.12462	-0.040271	-6.03669	3.00548e-09	7.67628e-09	10.1734
GOBP_EPIBOLY	-0.141398	-0.0390541	-6.03312	3.06815e-09	7.82871e-09	10.1533
GOBP_N_ACETYLGLUCOSAMINE_METABOLIC_PROCESS	-0.123946	-0.0450962	-6.03215	3.08548e-09	7.8691e-09	10.1479
GOBP_RENAL_ABSORPTION	0.139975	-0.0352307	6.03025	3.11943e-09	7.95182e-09	10.1372
GOBP_RESPONSE_TO_VIRUS	-0.125101	-0.0340263	-6.02815	3.15755e-09	8.04506e-09	10.1254
GOBP_MYELOID_CELL_DIFFERENTIATION	-0.107315	-0.030334	-6.02077	3.29517e-09	8.38756e-09	10.0839
GOBP_NEPHRON_TUBULE_FORMATION	0.145275	-0.0139336	6.02059	3.29859e-09	8.39219e-09	10.0829
GOBP_REGULATION_OF_PROTEIN_CATABOLIC_PROCESS_IN_THE_VACUOLE	-0.169447	-0.0419624	-6.01735	3.36077e-09	8.54208e-09	10.0647
GOBP_REGULATION_OF_CELL_JUNCTION_ASSEMBLY	-0.106026	-0.0296609	-6.01363	3.43369e-09	8.72319e-09	10.0439
GOBP_REGULATION_OF_PIGMENTATION	-0.140751	-0.0355333	-6.01306	3.44497e-09	8.74572e-09	10.0407
GOBP_FATTY_ACID_BETA_OXIDATION_USING_ACYL_COA_OXIDASE	-0.179769	-0.0492003	-6.01286	3.44899e-09	8.74934e-09	10.0395
GOBP_NEGATIVE_REGULATION_OF_PROTEIN_POLYMERIZATION	-0.103706	-0.0440937	-6.01174	3.47135e-09	8.80181e-09	10.0332
GOBP_ACTIN_FILAMENT_DEPOLYMERIZATION	-0.110048	-0.0420104	-6.00976	3.51126e-09	8.89869e-09	10.0221
GOBP_VENTRICULAR_TRABECULA_MYOCARDIUM_MORPHOGENESIS	-0.159542	-0.0239991	-6.00493	3.61031e-09	9.14088e-09	9.99508
GOBP_PYRIMIDINE_RIBONUCLEOTIDE_BIOSYNTHETIC_PROCESS	-0.132254	-0.0512131	-6.00459	3.61737e-09	9.15433e-09	9.99318
GOBP_DETOXIFICATION_OF_COPPER_ION	0.203458	-0.0301262	5.99953	3.72425e-09	9.42028e-09	9.96486
GOBP_REGULATION_OF_POLYSACCHARIDE_METABOLIC_PROCESS	-0.106791	-0.0329124	-5.99778	3.76205e-09	9.51128e-09	9.95504
GOBP_ANTEROGRADE_AXONAL_TRANSPORT	-0.147186	-0.0423642	-5.98844	3.96975e-09	1.00123e-08	9.90279
GOBP_BASE_EXCISION_REPAIR_GAP_FILLING	-0.19764	-0.0531591	-5.98192	4.12116e-09	1.03792e-08	9.86639
GOBP_SMOOTH_MUSCLE_TISSUE_DEVELOPMENT	-0.109724	-0.0265427	-5.98031	4.15945e-09	1.04705e-08	9.8574
GOBP_AMINOGLYCAN_BIOSYNTHETIC_PROCESS	-0.107694	-0.0421361	-5.97876	4.19665e-09	1.05591e-08	9.84874
GOBP_CELLULAR_RESPONSE_TO_LEPTIN_STIMULUS	-0.124809	-0.0298928	-5.97817	4.21078e-09	1.05896e-08	9.84548
GOBP_DEOXYRIBONUCLEOTIDE_BIOSYNTHETIC_PROCESS	-0.14733	-0.0460003	-5.97188	4.36558e-09	1.09736e-08	9.81038
[truncated: 525 more rows]

## Sheet: Table S5
Supplementary Table 5. GSEA of significant HALLMARK between CRG clusters.
Description	enrichmentScore	NES	pvalue	p.adjust	qvalues
HALLMARK_DNA_REPAIR	-0.615158	-1.28472	0.000999001	0.00386548	0.00154619
HALLMARK_E2F_TARGETS	-0.766486	-1.61138	0.000999001	0.00386548	0.00154619
HALLMARK_EPITHELIAL_MESENCHYMAL_TRANSITION	-0.682575	-1.43498	0.000999001	0.00386548	0.00154619
HALLMARK_G2M_CHECKPOINT	-0.758437	-1.59446	0.000999001	0.00386548	0.00154619
HALLMARK_GLYCOLYSIS	-0.59603	-1.25254	0.000999001	0.00386548	0.00154619
HALLMARK_INTERFERON_GAMMA_RESPONSE	-0.615621	-1.29422	0.000999001	0.00386548	0.00154619
HALLMARK_MITOTIC_SPINDLE	-0.691124	-1.45284	0.000999001	0.00386548	0.00154619
HALLMARK_MTORC1_SIGNALING	-0.646865	-1.3598	0.000999001	0.00386548	0.00154619
HALLMARK_MYC_TARGETS_V1	-0.660186	-1.38791	0.000999001	0.00386548	0.00154619
HALLMARK_PROTEIN_SECRETION	-0.691891	-1.42875	0.000999001	0.00386548	0.00154619
HALLMARK_UNFOLDED_PROTEIN_RESPONSE	-0.6437	-1.3323	0.000999001	0.00386548	0.00154619
HALLMARK_UV_RESPONSE_DN	-0.686634	-1.4333	0.000999001	0.00386548	0.00154619
HALLMARK_ANGIOGENESIS	-0.71543	-1.41493	0.00100503	0.00386548	0.00154619
HALLMARK_APOPTOSIS	-0.58618	-1.22692	0.001998	0.00624376	0.0024975
HALLMARK_PI3K_AKT_MTOR_SIGNALING	-0.611798	-1.2655	0.001998	0.00624376	0.0024975
HALLMARK_TNFA_SIGNALING_VIA_NFKB	-0.575767	-1.21044	0.001998	0.00624376	0.0024975
HALLMARK_ANDROGEN_RESPONSE	-0.608412	-1.25662	0.002997	0.00881471	0.00352589
HALLMARK_APICAL_JUNCTION	-0.569364	-1.1965	0.003996	0.00999001	0.003996
HALLMARK_HYPOXIA	-0.571664	-1.20171	0.003996	0.00999001	0.003996
HALLMARK_INTERFERON_ALPHA_RESPONSE	-0.59681	-1.23217	0.003996	0.00999001	0.003996
HALLMARK_MYC_TARGETS_V2	-0.63994	-1.3	0.00700701	0.0166834	0.00667334
HALLMARK_SPERMATOGENESIS	-0.570785	-1.19019	0.011988	0.0261131	0.0104452
HALLMARK_TGF_BETA_SIGNALING	-0.631358	-1.28172	0.012012	0.0261131	0.0104452
HALLMARK_HEME_METABOLISM	-0.553904	-1.16438	0.013986	0.0291375	0.011655
HALLMARK_KRAS_SIGNALING_UP	-0.547208	-1.1504	0.015984	0.031968	0.0127872
HALLMARK_COMPLEMENT	-0.544577	-1.14486	0.020979	0.0390843	0.0156337
HALLMARK_HEDGEHOG_SIGNALING	-0.650548	-1.28661	0.0211055	0.0390843	0.0156337

## Sheet: Table S6
Supplementary Table 6. Functional annotation of DEGs between two CRG clusters.
ONTOLOGY	ID	Description	GeneRatio	BgRatio	pvalue	p.adjust	qvalue	geneID	Count
BP	GO:0007059	chromosome segregation	104/1752	321/18670	4.62687e-31	2.70487e-27	2.23648e-27	APC/BIRC5/ATRX/BRCA1/BUB1/BUB1B/CCNB1/CDC6/CDC20/CENPE/CENPF/DDX3X/ECT2/ERCC4/FANCD2/FEN1/INCENP/KIFC1/MAD2L1/MKI67/NEK2/PLK1/RB1/TOP1/TOP2A/TOP3A/TPR/TTK/USP9X/SMC1A/CUL3/TNKS/CDC23/PRC1/LATS1/ZW10/AURKB/PTTG1/TRIP13/KIF23/ESPL1/DLGAP5/TLK1/NCAPD2/KIF14/SMC4/ACTR3/ACTR2/STAG1/NDC80/TACC3/SMC2/SPAG5/STAG2/NEK6/KIF2C/ZWINT/OIP5/PDS5B/SMC5/PDS5A/NCAPD3/NCAPH/KIF4A/NIPBL/FBXO5/RACGAP1/NUSAP1/MAP10/C…	104
BP	GO:0140014	mitotic nuclear division	90/1752	264/18670	7.13065e-29	1.87376e-25	1.54929e-25	APC/BIRC5/ATRX/BUB1/BUB1B/CCNB1/CDC6/CDC20/CDC25C/CDKN1C/CENPE/CENPF/CHEK1/EPS8/FLNA/INCENP/KIF2A/KIF11/KIFC1/MAD2L1/MKI67/MYBL2/NEK2/PLK1/RB1/AURKA/TPR/TTK/SMC1A/CUL3/CDK13/TNKS/CDC23/PRC1/PKMYT1/ZW10/AURKB/PTTG1/TRIP13/KIF23/KIF20B/ESPL1/KNTC1/DLGAP5/NCAPD2/KIF14/SMC4/STAG1/NDC80/TACC3/SMC2/SPAG5/STAG2/NEK6/KIF2C/UBE2C/ZWINT/TPX2/PDS5B/SMC5/PDS5A/NCAPD3/NCAPH/KIF4A/NIPBL/FBXO5/RACGAP1/NUSAP1/MA…	90
BP	GO:0000070	mitotic sister chromatid segregation	66/1752	151/18670	9.6156e-29	1.87376e-25	1.54929e-25	APC/ATRX/BUB1/BUB1B/CCNB1/CDC6/CDC20/CENPE/CENPF/INCENP/KIFC1/MAD2L1/NEK2/PLK1/RB1/TPR/TTK/SMC1A/CUL3/TNKS/CDC23/PRC1/ZW10/AURKB/PTTG1/TRIP13/KIF23/ESPL1/DLGAP5/NCAPD2/KIF14/SMC4/NDC80/TACC3/SMC2/SPAG5/NEK6/KIF2C/ZWINT/PDS5B/SMC5/PDS5A/NCAPD3/NCAPH/KIF4A/NIPBL/FBXO5/RACGAP1/NUSAP1/MAP10/CDCA8/CENPK/NCAPG/ANAPC1/DSCC1/DSN1/NAA50/KIF18A/NUF2/HASPIN/KNSTRN/CDCA5/KIF18B/SGO1/CHAMP1/GEN1	66
BP	GO:0000819	sister chromatid segregation	74/1752	189/18670	2.48659e-28	3.63415e-25	3.00484e-25	APC/ATRX/BUB1/BUB1B/CCNB1/CDC6/CDC20/CENPE/CENPF/FEN1/INCENP/KIFC1/MAD2L1/NEK2/PLK1/RB1/TOP2A/TPR/TTK/SMC1A/CUL3/TNKS/CDC23/PRC1/LATS1/ZW10/AURKB/PTTG1/TRIP13/KIF23/ESPL1/DLGAP5/NCAPD2/KIF14/SMC4/STAG1/NDC80/TACC3/SMC2/SPAG5/STAG2/NEK6/KIF2C/ZWINT/PDS5B/SMC5/PDS5A/NCAPD3/NCAPH/KIF4A/NIPBL/FBXO5/RACGAP1/NUSAP1/MAP10/CDCA8/CENPK/NCAPG/ANAPC1/DSCC1/DSN1/NAA50/KIF18A/NUF2/HASPIN/KNSTRN/CDCA5/RMI2/KIF…	74
BP	GO:0000280	nuclear division	115/1752	407/18670	3.19487e-28	3.73544e-25	3.0886e-25	APC/BIRC5/ATRX/BRCA2/BUB1/BUB1B/CCNB1/CDC6/CDC20/CDC25C/CDKN1C/CENPE/CENPF/CHEK1/CKS2/EPS8/ERCC4/FANCA/FANCD2/FLNA/GPR3/HSPA2/INCENP/KIF2A/KIF11/KIFC1/LIF/MAD2L1/MKI67/MSH3/MYBL2/NEK2/PLK1/RAD1/RAD51/RB1/AURKA/TOP2A/TPR/TTK/SMC1A/RAD54L/CUL3/CDK13/TNKS/CDC23/PRC1/PKMYT1/ZW10/AURKB/PTTG1/TRIP13/KIF23/KIF20B/ESPL1/KNTC1/DLGAP5/NCAPD2/KIF14/SMC4/ACTR3/ACTR2/RAD50/STAG1/NDC80/TACC3/SMC2/SPAG5/STAG2/N…	115
BP	GO:0048285	organelle fission	118/1752	449/18670	7.1772e-26	6.99299e-23	5.78205e-23	APC/BIRC5/ATRX/BRCA2/BUB1/BUB1B/CCNB1/CDC6/CDC20/CDC25C/CDKN1C/CENPE/CENPF/CHEK1/CKS2/EPS8/ERCC4/FANCA/FANCD2/FLNA/GPR3/HSPA2/INCENP/KDR/KIF2A/KIF11/KIFC1/LIF/MAD2L1/MKI67/MSH3/MYBL2/NEK2/OPA1/PLK1/RAD1/RAD51/RB1/AURKA/TOP2A/TPR/TTK/SMC1A/RAD54L/CUL3/CDK13/TNKS/CDC23/PRC1/PKMYT1/ZW10/AURKB/PTTG1/TRIP13/KIF23/KIF20B/ESPL1/KNTC1/DLGAP5/NCAPD2/KIF14/SMC4/ACTR3/ACTR2/RAD50/STAG1/NDC80/TACC3/SMC2/SPAG…	118
BP	GO:0098813	nuclear chromosome segregation	85/1752	262/18670	1.25804e-25	1.05064e-22	8.6871e-23	APC/ATRX/BUB1/BUB1B/CCNB1/CDC6/CDC20/CENPE/CENPF/ECT2/ERCC4/FANCD2/FEN1/INCENP/KIFC1/MAD2L1/NEK2/PLK1/RB1/TOP2A/TPR/TTK/SMC1A/CUL3/TNKS/CDC23/PRC1/LATS1/ZW10/AURKB/PTTG1/TRIP13/KIF23/ESPL1/DLGAP5/NCAPD2/KIF14/SMC4/ACTR3/ACTR2/STAG1/NDC80/TACC3/SMC2/SPAG5/STAG2/NEK6/KIF2C/ZWINT/PDS5B/SMC5/PDS5A/NCAPD3/NCAPH/KIF4A/NIPBL/FBXO5/RACGAP1/NUSAP1/MAP10/CDCA8/NDC1/KNL1/CENPK/NCAPG/ANAPC1/DSCC1/DSN1/RMI1/N…	85
BP	GO:0006260	DNA replication	85/1752	274/18670	3.95086e-24	2.88709e-21	2.38715e-21	ATR/ATRX/BARD1/BRCA1/BRCA2/CCNA2/CDK1/CDC6/CDK2/CHEK1/DHX9/EGFR/FEN1/MSH6/MCM2/MCM4/MCM6/MSH3/NUP98/ORC1/ORC5/PCNA/POLA1/POLH/PRIM1/RAD1/RAD51/RBBP8/RBMS1/RECQL/REV3L/RFC3/RRM1/RRM2/TOP1/TOP3A/TP53/WRN/CHAF1B/SMC1A/CDC7/CDC45/TIMELESS/EXO1/PCLAF/GINS1/CHAF1A/RAD50/POLD3/STAG2/DBF4/TOPBP1/WDHD1/BAZ1A/SUPT16H/NCOA6/PDS5A/ORC6/ANKRD17/FBXO5/RRM2B/POLK/DTL/GINS2/RFWD3/MCM10/CCDC88A/USP37/CLSPN/DSCC1/…	85
BP	GO:0000075	cell cycle checkpoint	67/1752	216/18670	2.76834e-19	1.79819e-16	1.48681e-16	APC/ATR/CCND1/BRCA1/BUB1/BUB1B/CASP2/CCNB1/CDK1/CDC6/CDC20/CDC25C/CDK2/CENPF/CHEK1/CRY1/E2F1/EP300/MAD2L1/MSH2/ORC1/PCNA/PLK1/PRKDC/PROX1/RAD1/RB1/RBL2/SOX11/AURKA/TOP2A/TP53/TP53BP1/TPR/TTK/WEE1/CDC45/TIMELESS/ZW10/AURKB/TRIP13/CLOCK/KNTC1/NDC80/PLK2/TOPBP1/ZWINT/CNOT1/INTS7/GTSE1/DTL/MAP3K20/ZWILCH/RFWD3/TAOK1/RINT1/CLSPN/DCLRE1B/E2F8/WDR76/RHNO1/BRIP1/E2F7/EME1/TIPRL/GEN1/EIF2AK4	67
BP	GO:0044843	cell cycle G1/S phase transition	81/1752	298/18670	4.53984e-19	2.65399e-16	2.19442e-16	ANXA1/ATP2B4/BACH1/BCAT1/CCND1/CASP2/CCNA2/CCNB1/CCND2/CDK1/CDC6/CDC25A/CDC25C/CDK2/CDK4/CDK6/CDKN2C/CDKN3/DDX3X/DHFR/E2F1/EGFR/EP300/EZH2/ITGB1/MCM2/MCM4/MCM6/NPAT/ORC1/ORC5/PCNA/PKD2/POLA1/PPAT/PRIM1/PRKDC/RB1/RBBP8/RBL1/RBL2/RPS6KB1/RRM2/SKP2/AURKA/ADAM17/TAF1/TP53/TYMS/WEE1/CDC7/CDC45/CUL4B/CUL3/CUL1/PIAS1/LATS1/KIF14/PLK2/DBF4/FAM107A/CNOT1/ORC6/ANKRD17/FBXO5/GTSE1/RFWD3/MCM10/KMT2E/TCIM/GJC…	81
BP	GO:0051983	regulation of chromosome segregation	43/1752	103/18670	2.85049e-18	1.51491e-15	1.25258e-15	APC/ATRX/BUB1/BUB1B/CCNB1/CDC6/CDC20/CENPE/CENPF/ECT2/FEN1/MAD2L1/MKI67/NEK2/PLK1/RB1/TPR/TTK/CUL3/TNKS/CDC23/ZW10/AURKB/PTTG1/TRIP13/ESPL1/DLGAP5/NDC80/TACC3/SPAG5/NEK6/KIF2C/SMC5/NIPBL/FBXO5/RACGAP1/RAD18/ANAPC1/SMC6/KNSTRN/CDCA5/RMI2/GEN1	43
BP	GO:0000082	G1/S transition of mitotic cell cycle	76/1752	279/18670	4.97645e-18	2.42436e-15	2.00455e-15	ANXA1/BACH1/BCAT1/CCND1/CASP2/CCNB1/CCND2/CDK1/CDC6/CDC25A/CDC25C/CDK2/CDK4/CDK6/CDKN2C/CDKN3/DDX3X/DHFR/E2F1/EGFR/EP300/EZH2/ITGB1/MCM2/MCM4/MCM6/NPAT/ORC1/ORC5/PCNA/PKD2/POLA1/PPAT/PRIM1/PRKDC/RB1/RBBP8/RBL1/RBL2/RPS6KB1/RRM2/SKP2/AURKA/ADAM17/TP53/TYMS/WEE1/CDC7/CDC45/CUL4B/CUL3/CUL1/PIAS1/LATS1/KIF14/PLK2/DBF4/FAM107A/CNOT1/ORC6/ANKRD17/FBXO5/GTSE1/RFWD3/MCM10/KMT2E/GJC2/USP37/ZNF655/CDC73/E2…	76
BP	GO:1901987	regulation of cell cycle phase transition	104/1752	480/18670	2.21632e-16	9.96664e-14	8.24078e-14	ANXA1/APC/ATP2B4/CCND1/BRCA1/BUB1/BUB1B/CASP2/CCNB1/CCND2/CDK1/CDC6/CDC20/CDC25A/CDC25C/CDK2/CDK4/CDK6/CDKN1C/CDKN2C/CENPE/CENPF/CHEK1/DDX3X/E2F1/EGFR/EP300/EZH2/HMMR/HSPA2/MAD2L1/NEK2/ORC1/PCNA/PKD2/PLK1/PRKAR2B/PRKDC/RB1/RBL1/RBL2/AURKA/ADAM17/TAF1/TP53/TPR/TTK/WEE1/YWHAG/ALMS1/CDC7/CDC45/CUL4B/CUL3/CUL1/CDC23/ZW10/AURKB/TRIP13/CEP135/ESPL1/KNTC1/DLGAP5/CKAP5/KIF14/AKAP9/TUBB4A/NDC80/PLK4/PLK2/…	104
BP	GO:1902850	microtubule cytoskeleton organization involved in mitosis	46/1752	131/18670	5.82202e-16	2.43111e-13	2.01013e-13	BIRC5/CCNB1/CDC20/CENPA/CENPE/CLTC/FLNA/KIF2A/KIF11/KIFC1/MAD2L1/MYBL2/NEK2/PLK1/STIL/AURKA/TPR/TTK/SMC1A/TNKS/PRC1/ZW10/AURKB/KIF23/ESPL1/SPRY1/SPRY2/STAG1/NDC80/TACC3/STAG2/PLK2/TPX2/KIF4A/POC1A/RACGAP1/GPSM2/NUSAP1/MAP10/CEP192/SPC25/BORA/MAP9/NUF2/UBXN2B/WDR62	46
BP	GO:0007088	regulation of mitotic nuclear division	52/1752	164/18670	1.02194e-15	3.98285e-13	3.29317e-13	APC/ATRX/BUB1/BUB1B/CCNB1/CDC6/CDC20/CDC25C/CDKN1C/CENPE/CENPF/CHEK1/KIF11/MAD2L1/MKI67/NEK2/PLK1/RB1/AURKA/TPR/TTK/SMC1A/CUL3/CDK13/TNKS/CDC23/PKMYT1/ZW10/AURKB/PTTG1/TRIP13/KIF20B/ESPL1/KNTC1/DLGAP5/STAG1/NDC80/TACC3/STAG2/NEK6/UBE2C/SMC5/NIPBL/FBXO5/NUSAP1/PHIP/ANAPC1/BORA/MAP9/CDCA5/UBXN2B/GEN1	52
BP	GO:1901990	regulation of mitotic cell cycle phase transition	97/1752	444/18670	1.33525e-15	4.87865e-13	4.03385e-13	ANXA1/APC/CCND1/BRCA1/BUB1/BUB1B/CASP2/CCNB1/CCND2/CDK1/CDC6/CDC20/CDC25A/CDC25C/CDK2/CDK4/CDK6/CDKN1C/CDKN2C/CENPE/CENPF/DDX3X/E2F1/EGFR/EP300/EZH2/HMMR/HSPA2/MAD2L1/NEK2/ORC1/PCNA/PKD2/PLK1/PRKAR2B/PRKDC/RB1/RBL1/RBL2/AURKA/ADAM17/TP53/TPR/TTK/WEE1/YWHAG/ALMS1/CDC7/CDC45/CUL4B/CUL3/CUL1/CDC23/ZW10/AURKB/TRIP13/CEP135/ESPL1/KNTC1/DLGAP5/CKAP5/KIF14/AKAP9/TUBB4A/NDC80/PLK4/PLK2/NEK6/UBE2C/TOPBP1/…	97
BP	GO:0090068	positive regulation of cell cycle process	74/1752	298/18670	3.17408e-15	1.09151e-12	9.025e-13	ANXA1/ATRX/CCND1/BRCA1/CASP2/CCNB1/CCND2/CDK1/CDC6/CDC25A/CDC25C/CDK2/CDK4/DDX3X/E2F1/ECT2/EGFR/EP300/EZH2/FEN1/HSPA2/INSM1/MAD2L1/PCNA/PKD2/MED1/PKN2/RB1/RBL2/AURKA/ADAM17/TP53/TPR/CDC7/CDC45/CUL4B/CUL3/AURKB/ROCK2/KIF23/KIF20B/ESPL1/DLGAP5/KIF14/NDC80/SPAG5/PLK4/PLK2/DBF4/UBE2C/CNOT1/SMC5/NIPBL/POC1A/ANKRD17/FBXO5/RACGAP1/GPSM2/NUSAP1/GTSE1/DTL/MAP10/PHIP/KMT2E/CDC73/E2F8/FAM83D/RHNO1/CEP295/CD…	74
BP	GO:0033045	regulation of sister chromatid segregation	34/1752	80/18670	5.07708e-15	1.64892e-12	1.36339e-12	APC/ATRX/BUB1/BUB1B/CCNB1/CDC6/CDC20/CENPE/CENPF/FEN1/MAD2L1/PLK1/RB1/TPR/TTK/CUL3/TNKS/CDC23/ZW10/AURKB/PTTG1/TRIP13/ESPL1/DLGAP5/NDC80/TACC3/NEK6/SMC5/NIPBL/FBXO5/ANAPC1/CDCA5/RMI2/GEN1	34
BP	GO:0051783	regulation of nuclear division	55/1752	188/18670	7.49539e-15	2.19394e-12	1.81403e-12	APC/ATRX/BUB1/BUB1B/CCNB1/CDC6/CDC20/CDC25C/CDKN1C/CENPE/CENPF/CHEK1/GPR3/KIF11/LIF/MAD2L1/MKI67/NEK2/PLK1/RAD1/RB1/AURKA/TPR/TTK/SMC1A/CUL3/CDK13/TNKS/CDC23/PKMYT1/ZW10/AURKB/PTTG1/TRIP13/KIF20B/ESPL1/KNTC1/DLGAP5/STAG1/NDC80/TACC3/STAG2/NEK6/UBE2C/SMC5/NIPBL/FBXO5/NUSAP1/PHIP/ANAPC1/BORA/MAP9/CDCA5/UBXN2B/GEN1	55
BP	GO:0033047	regulation of mitotic sister chromatid segregation	31/1752	68/18670	7.50579e-15	2.19394e-12	1.81403e-12	APC/ATRX/BUB1/BUB1B/CCNB1/CDC6/CDC20/CENPE/CENPF/MAD2L1/PLK1/RB1/TPR/TTK/CUL3/TNKS/CDC23/ZW10/AURKB/PTTG1/TRIP13/ESPL1/DLGAP5/NDC80/TACC3/NEK6/SMC5/NIPBL/FBXO5/ANAPC1/GEN1	31
BP	GO:0051304	chromosome separation	36/1752	90/18670	7.97464e-15	2.21999e-12	1.83557e-12	APC/BUB1/BUB1B/CCNB1/CDC6/CDC20/CENPE/CENPF/ERCC4/MAD2L1/PLK1/RB1/TOP2A/TOP3A/TPR/TTK/CUL3/CDC23/ZW10/AURKB/PTTG1/TRIP13/ESPL1/DLGAP5/NCAPD2/NDC80/TACC3/NEK6/NCAPD3/NCAPH/FBXO5/SMARCAD1/ANAPC1/RMI1/EME1/GEN1	36
BP	GO:0007093	mitotic cell cycle checkpoint	50/1752	165/18670	2.72352e-14	7.03618e-12	5.81777e-12	APC/CCND1/BRCA1/BUB1/BUB1B/CASP2/CCNB1/CDK1/CDC6/CDC20/CDC25C/CDK2/CENPF/E2F1/EP300/MAD2L1/MSH2/ORC1/PCNA/PLK1/PRKDC/RB1/RBL2/AURKA/TOP2A/TP53/TPR/TTK/WEE1/ZW10/AURKB/TRIP13/KNTC1/NDC80/PLK2/TOPBP1/ZWINT/CNOT1/GTSE1/MAP3K20/ZWILCH/RFWD3/TAOK1/RINT1/CLSPN/DCLRE1B/E2F8/E2F7/EME1/GEN1	50
BP	GO:0045787	positive regulation of cell cycle	86/1752	389/18670	2.76825e-14	7.03618e-12	5.81777e-12	ANXA1/ATRX/CCND1/BRCA1/BRCA2/CASP2/CCNB1/CCND2/CCNT1/CDK1/CDC6/CDC25A/CDC25C/CDK2/CDK4/CHEK1/CKS1B/CKS2/DDX3X/E2F1/ECT2/EGFR/EP300/EZH2/FEN1/HSPA2/INSM1/LRP6/MAD2L1/PCNA/PKD2/MED1/PKN2/PROX1/RB1/RBL2/RPS6KB1/SRPK2/AURKA/ADAM17/TGFB2/NR2E1/TP53/TPR/CDC7/CDC45/CUL4B/CUL3/AURKB/ROCK2/KIF23/KIF20B/ESPL1/DLGAP5/KIF14/NDC80/SPAG5/PLK4/PLK2/DBF4/UBE2C/CNOT1/SMC5/NIPBL/POC1A/ANKRD17/FBXO5/RACGAP1/GPSM2/N…	86
BP	GO:0007052	mitotic spindle organization	38/1752	106/18670	9.26119e-14	2.25587e-11	1.86524e-11	BIRC5/CCNB1/CDC20/CENPE/CLTC/FLNA/KIF2A/KIF11/KIFC1/MYBL2/NEK2/PLK1/STIL/AURKA/TPR/TTK/SMC1A/TNKS/PRC1/AURKB/KIF23/STAG1/NDC80/TACC3/STAG2/PLK2/TPX2/KIF4A/POC1A/RACGAP1/GPSM2/MAP10/CEP192/SPC25/BORA/MAP9/NUF2/WDR62	38
BP	GO:0010965	regulation of mitotic sister chromatid separation	27/1752	57/18670	1.27706e-13	2.98627e-11	2.46915e-11	APC/BUB1/BUB1B/CCNB1/CDC6/CDC20/CENPE/CENPF/MAD2L1/PLK1/RB1/TPR/TTK/CUL3/CDC23/ZW10/AURKB/PTTG1/TRIP13/ESPL1/DLGAP5/NDC80/TACC3/NEK6/FBXO5/ANAPC1/GEN1	27
BP	GO:0007091	metaphase/anaphase transition of mitotic cell cycle	26/1752	54/18670	2.23e-13	5.01407e-11	4.14582e-11	APC/BUB1/BUB1B/CCNB1/CDC6/CDC20/CENPE/CENPF/MAD2L1/PLK1/RB1/TPR/TTK/CUL3/CDC23/ZW10/AURKB/TRIP13/ESPL1/DLGAP5/NDC80/TACC3/NEK6/FBXO5/ANAPC1/GEN1	26
BP	GO:0007051	spindle organization	49/1752	170/18670	4.09712e-13	8.87101e-11	7.33488e-11	BIRC5/ATRX/CCNB1/CDC20/CENPE/CLTC/FLNA/KIF2A/KIF11/KIFC1/MYBL2/NEK2/PLK1/STIL/AURKA/TPR/TTK/SMC1A/TNKS/PRC1/AURKB/KIF23/NCOR1/ESPL1/CKAP5/STAG1/NDC80/TACC3/SPAG5/STAG2/PLK2/NEK6/TPX2/KIF4A/POC1A/FBXO5/RACGAP1/GPSM2/MAP10/CEP192/HAUS2/SPC25/BORA/MAP9/NUF2/KNSTRN/ASPM/WDR62/CENPW	49
BP	GO:0051306	mitotic sister chromatid separation	27/1752	60/18670	6.05613e-13	1.26443e-10	1.04548e-10	APC/BUB1/BUB1B/CCNB1/CDC6/CDC20/CENPE/CENPF/MAD2L1/PLK1/RB1/TPR/TTK/CUL3/CDC23/ZW10/AURKB/PTTG1/TRIP13/ESPL1/DLGAP5/NDC80/TACC3/NEK6/FBXO5/ANAPC1/GEN1	27
BP	GO:0044784	metaphase/anaphase transition of cell cycle	26/1752	56/18670	6.55339e-13	1.32082e-10	1.0921e-10	APC/BUB1/BUB1B/CCNB1/CDC6/CDC20/CENPE/CENPF/MAD2L1/PLK1/RB1/TPR/TTK/CUL3/CDC23/ZW10/AURKB/TRIP13/ESPL1/DLGAP5/NDC80/TACC3/NEK6/FBXO5/ANAPC1/GEN1	26
BP	GO:0033044	regulation of chromosome organization	76/1752	342/18670	6.77809e-13	1.32082e-10	1.0921e-10	APC/ATR/ATRX/BRCA1/BUB1/BUB1B/CAMK2D/CCNB1/CCT6A/CDC6/CDC20/CENPE/CENPF/CHEK1/DNMT1/ERCC4/FEN1/LIF/MAD2L1/MCM2/MKI67/NEK2/PLK1/PKIB/RB1/KDM5A/SNAI2/TOP2A/TP53/TPR/TTK/VEGFA/XRCC5/CDC45/CUL3/TNKS/CDC23/ZW10/AURKB/PTTG1/TRIP13/TRIP12/ESPL1/DLGAP5/RNF40/TLK1/RAD50/NDC80/TACC3/NEK6/PAXIP1/SMG1/SMC5/RTF1/SMG6/NIPBL/POT1/FBXO5/ATAD2/UBR5/GNL3L/BCOR/PRMT6/RIF1/RESF1/ATF7IP/KMT2E/NSD1/ANAPC1/CDCA5/RMI2/L…	76
BP	GO:0031570	DNA integrity checkpoint	46/1752	157/18670	1.12118e-12	2.11432e-10	1.7482e-10	ATR/CCND1/BRCA1/CASP2/CCNB1/CDK1/CDC6/CDC25C/CDK2/CHEK1/CRY1/E2F1/EP300/MSH2/ORC1/PCNA/PLK1/PRKDC/RAD1/RBL2/AURKA/TOP2A/TP53/TP53BP1/CDC45/TIMELESS/CLOCK/PLK2/TOPBP1/CNOT1/INTS7/GTSE1/DTL/MAP3K20/RFWD3/TAOK1/RINT1/CLSPN/E2F8/WDR76/RHNO1/BRIP1/E2F7/EME1/TIPRL/EIF2AK4	46
BP	GO:0071103	DNA conformation change	73/1752	327/18670	1.52969e-12	2.79455e-10	2.31063e-10	ANXA1/ATRX/CCNB1/CDK1/CENPA/CHD1/DDX3X/DHX9/CENPI/HELLS/HMGB3/MCM2/MCM4/MCM6/RAD51/RECQL/RFC3/TOP1/TOP2A/TOP3A/TP53/TPR/WRN/XRCC5/KAT6A/CHAF1B/CDC45/RAD54L/CUL4B/GINS1/NCAPD2/CHAF1A/SMC4/RAD50/SMC2/ASCC3/OIP5/PSME4/NCAPD3/SMCHD1/NCAPH/NIPBL/POT1/NUSAP1/GINS2/RSF1/ERCC6L/NCAPG2/MIS18BP1/HJURP/ASF1B/CENPN/ASH1L/RAD18/SMARCAD1/KNL1/CENPK/NCAPG/CENPH/DSCC1/CENPO/CENPU/CHD9/BRIP1/CHD6/GINS4/MCM8/CENPL…	73
BP	GO:1905818	regulation of chromosome separation	27/1752	62/18670	1.59751e-12	2.83002e-10	2.33996e-10	APC/BUB1/BUB1B/CCNB1/CDC6/CDC20/CENPE/CENPF/MAD2L1/PLK1/RB1/TPR/TTK/CUL3/CDC23/ZW10/AURKB/PTTG1/TRIP13/ESPL1/DLGAP5/NDC80/TACC3/NEK6/FBXO5/ANAPC1/GEN1	27
BP	GO:0030071	regulation of mitotic metaphase/anaphase transition	24/1752	51/18670	3.50867e-12	6.03286e-10	4.98818e-10	APC/BUB1/BUB1B/CCNB1/CDC6/CDC20/CENPE/CENPF/MAD2L1/PLK1/RB1/TPR/TTK/CUL3/CDC23/ZW10/AURKB/TRIP13/ESPL1/DLGAP5/NDC80/NEK6/FBXO5/GEN1	24
BP	GO:0010948	negative regulation of cell cycle process	77/1752	361/18670	4.27729e-12	7.1443e-10	5.90716e-10	APAF1/APC/ATRX/CCND1/BRCA1/BUB1/BUB1B/CASP2/CCNB1/CCNF/CDK1/CDC6/CDC20/CDC25C/CDK2/CDK4/CDK6/CDKN2C/CENPF/CHEK1/E2F1/EP300/EZH2/MSH6/LIF/MAD2L1/NEK2/ORC1/PCNA/PKD2/PLK1/PRKDC/RAD1/RAD51/RB1/RBBP8/RBL1/RBL2/RNF2/RRM2/AURKA/TP53/TPR/TTK/WEE1/SMC1A/CDC7/CUL1/TNKS/ZW10/AURKB/PTTG1/TRIP13/ESPL1/NDC80/STAG2/PLK2/TOPBP1/FAM107A/CNOT1/PSME4/CBX5/SUZ12/FBXO5/GTSE1/DTL/RFWD3/GJC2/TAOK1/RINT1/CLSPN/ZNF655/C…	77
BP	GO:0051321	meiotic cell cycle	60/1752	249/18670	5.25574e-12	8.53473e-10	7.05683e-10	ATRX/BRCA2/BUB1/BUB1B/CDC20/CDC25A/CDC25C/CDK2/CKS2/ERCC4/FANCA/FANCD2/GPR3/MSH6/HSPA2/LIF/MSH3/NEK2/PLK1/RAD1/RAD51/RBBP8/AURKA/TOP2A/TOP3A/TTK/XRCC2/SMC1A/RAD54L/PKMYT1/EXO1/ZW10/PTTG1/TRIP13/ESPL1/UTP14C/NCAPD2/SMC4/ACTR3/ACTR2/RAD50/SMC2/STAG2/NCAPD3/NCAPH/ZNF318/FBXO5/MNS1/NDC1/FIGNL1/RMI1/KIF18A/NUF2/BRIP1/MND1/MASTL/EME1/SGO2/SGO1/ASPM	60
BP	GO:0006261	DNA-dependent DNA replication	44/1752	153/18670	6.97244e-12	1.10165e-09	9.1088e-10	ATRX/BRCA2/CDC6/CDK2/FEN1/MSH6/MCM2/MCM4/MCM6/MSH3/ORC1/ORC5/PCNA/POLA1/PRIM1/RAD51/RECQL/REV3L/RFC3/WRN/SMC1A/CDC7/CDC45/TIMELESS/GINS1/POLD3/STAG2/DBF4/WDHD1/BAZ1A/ORC6/FBXO5/RRM2B/GINS2/RFWD3/MCM10/DSCC1/E2F8/GINS4/E2F7/EME1/RNASEH1/BOD1L1/GEN1	44
BP	GO:1902099	regulation of metaphase/anaphase transition of cell cycle	24/1752	53/18670	9.89048e-12	1.52157e-09	1.25809e-09	APC/BUB1/BUB1B/CCNB1/CDC6/CDC20/CENPE/CENPF/MAD2L1/PLK1/RB1/TPR/TTK/CUL3/CDC23/ZW10/AURKB/TRIP13/ESPL1/DLGAP5/NDC80/NEK6/FBXO5/GEN1	24
BP	GO:0044839	cell cycle G2/M phase transition	62/1752	266/18670	1.07458e-11	1.61077e-09	1.33184e-09	BACH1/CCND1/BRCA1/CCNA2/CCNB1/CDK1/CDC6/CDC25A/CDC25C/CDK2/CDK4/CENPF/CHEK1/FOXM1/HMMR/HSPA2/PPP1R12A/NEK2/ORC1/CDK14/PLK1/PRKAR2B/SKP2/AURKA/TAF2/TP53/WEE1/YWHAG/ALMS1/CDC7/CUL1/PPM1D/PKMYT1/LATS1/CCNB2/AURKB/CEP135/CKAP5/MELK/KIF14/USH1C/AKAP9/TUBB4A/PLK4/TOPBP1/TPX2/PAXIP1/CEP152/PSME4/FBXO5/GTSE1/DTL/CEP192/HAUS2/TAOK1/RINT1/CLSPN/BORA/FBXL18/MASTL/CEP41/NEDD1	62
BP	GO:0006302	double-strand break repair	59/1752	248/18670	1.38862e-11	2.02947e-09	1.67804e-09	BARD1/BRCA1/BRCA2/CHEK1/ERCC4/FEN1/FOXM1/MCM2/MCM4/MCM6/MSH2/POLA1/PRKDC/RAD51/RBBP8/RECQL/REV3L/TP53/TP53BP1/NSD2/WRN/XRCC2/XRCC5/DEK/CDC7/CDC45/RAD54L/TIMELESS/TRIP13/TRIP12/DCLRE1A/ACTR2/RAD50/RAD51AP1/PAXIP1/SMC5/SMCHD1/NIPBL/UBR5/GINS2/PARPBP/RFWD3/RIF1/TDP1/SMARCAD1/FIGNL1/DCLRE1B/RMI1/PARP9/BRIP1/GINS4/MCM8/CDCA5/RMI2/EME1/DTX3L/ESCO2/RNF169/GEN1	59
BP	GO:0051052	regulation of DNA metabolic process	85/1752	429/18670	2.04718e-11	2.91898e-09	2.41352e-09	PARP4/APAF1/ATR/ATRX/BMPR2/BRCA1/BRCA2/CCNA2/CCT6A/CDK1/CDC6/CDK2/CHEK1/DHX9/DNMT1/EGFR/ERCC4/FOXM1/MSH6/KPNA2/MSH2/MSH3/NEK2/PCNA/PIK3CA/POLH/PKIB/PRKDC/RAD51/RFC3/RLF/TFRC/TP53/TP53BP1/USP1/NSD2/WRN/XRCC5/ZNF91/DEK/USP9X/SMC1A/CDC7/TNKS/TIMELESS/AURKB/TRIP12/ACTR2/RAD50/RAD51AP1/STAG2/DBF4/PAXIP1/SMG1/PDS5A/SMG6/SMCHD1/PARM1/POT1/ANKRD17/FBXO5/UBR5/GNL3L/OTUD4/PARPBP/RIF1/RESF1/CCDC88A/ATF7IP/S…	85
BP	GO:0000086	G2/M transition of mitotic cell cycle	58/1752	247/18670	3.62146e-11	5.04073e-09	4.16786e-09	BACH1/CCND1/BRCA1/CCNA2/CCNB1/CDK1/CDC6/CDC25A/CDC25C/CDK2/CDK4/CENPF/FOXM1/HMMR/HSPA2/PPP1R12A/NEK2/ORC1/CDK14/PLK1/PRKAR2B/SKP2/AURKA/TAF2/WEE1/YWHAG/ALMS1/CDC7/CUL1/PPM1D/PKMYT1/LATS1/CCNB2/AURKB/CEP135/CKAP5/MELK/KIF14/USH1C/AKAP9/TUBB4A/PLK4/TOPBP1/TPX2/CEP152/PSME4/FBXO5/DTL/CEP192/HAUS2/TAOK1/RINT1/CLSPN/BORA/FBXL18/MASTL/CEP41/NEDD1	58
BP	GO:0070507	regulation of microtubule cytoskeleton organization	48/1752	186/18670	5.49857e-11	7.4755e-09	6.18102e-09	APC/BICD1/BRCA1/CCNF/CHEK1/CLTC/EPHA3/GSK3B/KIF11/MAP1B/MET/MID1/NEK2/PLK1/PRKAA1/CLIP1/STIL/AURKA/TPR/XPO1/ALMS1/SMC1A/ROCK2/AKAP9/STAG1/TUBB4A/TACC3/SPAG5/PLK4/STAG2/PLK2/FAM107A/TPX2/CAMSAP2/POC1A/CKAP2/GPSM2/NIN/TAOK1/SLAIN2/BORA/MAP9/KIF18A/CEP295/UBXN2B/SKA1/SKA3/GEN1	48
BP	GO:0072331	signal transduction by p53 class mediator	60/1752	267/18670	1.12668e-10	1.49694e-08	1.23773e-08	ATR/ATRX/BARD1/BOK/BRCA1/BRCA2/CASP2/CCNB1/CDK1/CDC25C/CDK2/CHEK1/E2F1/E2F2/EP300/FOXM1/MSH2/PCNA/PRKAA1/RAD1/RBBP8/RBL2/RFC3/SNAI2/AURKA/TAF1/TAF2/TOP3A/TP53/WRN/KAT6A/PPM1D/TRIM24/EXO1/AURKB/RAD50/PLK2/TOPBP1/SUPT16H/TPX2/PAXIP1/CNOT1/NUPR1/RRM2B/GTSE1/PRMT6/SMYD2/EDA2R/AEN/MARCHF7/E2F8/RMI1/RHNO1/BRIP1/RMI2/E2F7/SPRED1/SPRED2/ACER2/SPRED3	60
BP	GO:0045930	negative regulation of mitotic cell cycle	70/1752	338/18670	1.62822e-10	2.11524e-08	1.74895e-08	APC/ATRX/CCND1/BRCA1/BUB1/BUB1B/CASP2/CCNB1/CDK1/CDC6/CDC20/CDC25C/CDK2/CDK4/CDK6/CDKN2C/CENPF/CHEK1/E2F1/EGFR/EP300/EZH2/GAS1/MAD2L1/MSH2/ORC1/PCNA/PKD2/PLK1/PRKDC/RB1/RBL1/RBL2/AURKA/TOP2A/TP53/TPR/TTK/WEE1/CUL1/TNKS/ZW10/AURKB/PTTG1/TRIP13/KNTC1/NDC80/PLK2/TOPBP1/ZWINT/FAM107A/CNOT1/PSME4/FBXO5/GTSE1/MAP3K20/ZWILCH/RFWD3/GJC2/TAOK1/RINT1/CLSPN/DCLRE1B/ZNF655/CDC73/E2F8/E2F7/EME1/DDIAS/GEN1	70
BP	GO:0032886	regulation of microtubule-based process	52/1752	218/18670	2.02545e-10	2.55332e-08	2.11118e-08	APC/BICD1/BRCA1/CCNF/CHEK1/CLTC/DIAPH1/EPHA3/GSK3B/KIF11/MAP1B/MET/MID1/NEK2/PLK1/PRKAA1/CLIP1/STIL/AURKA/TPR/XPO1/ALMS1/SMC1A/ROCK2/AKAP9/STAG1/TUBB4A/TACC3/SPAG5/PLK4/STAG2/PLK2/FAM107A/TPX2/CAMSAP2/POC1A/CKAP2/GPSM2/NIN/MAP10/KLHL42/TAOK1/SLAIN2/TTC21B/BORA/MAP9/KIF18A/CEP295/UBXN2B/SKA1/SKA3/GEN1	52
BP	GO:0009314	response to radiation	85/1752	448/18670	2.05279e-10	2.55332e-08	2.11118e-08	ANGPT2/ANXA1/ATR/CCND1/BRCA1/BRCA2/CASP3/CBL/CDC25A/CHEK1/COL3A1/CREB1/CRY1/ECT2/EGFR/EIF2S1/ELK1/EP300/ERCC4/FANCD2/FEN1/MTOR/MSH6/HIF1A/HMGCR/HMGCS1/HRH1/CXCL10/ITGB1/KRAS/MSH2/PCNA/POLH/PRKAA1/PRKDC/PTN/RAD1/RAD51/RBL2/RRM1/SFRP2/SNAI2/RO60/TAF1/TP53/TP53BP1/USP1/WRN/XRCC2/XRCC5/SMC1A/RAD54L/CUL4B/PPM1D/PIAS1/AURKB/CLOCK/PCLAF/NAMPT/RAD51AP1/POLD3/TOPBP1/PAXIP1/OPN3/NIPBL/INTS7/POLK/DTL/MAP3K2…	85
BP	GO:0000077	DNA damage checkpoint	40/1752	145/18670	2.51087e-10	3.05803e-08	2.52849e-08	ATR/CCND1/BRCA1/CASP2/CCNB1/CDK1/CDC25C/CDK2/CHEK1/CRY1/E2F1/EP300/MSH2/PCNA/PLK1/PRKDC/RAD1/RBL2/AURKA/TP53/TP53BP1/CLOCK/PLK2/CNOT1/INTS7/GTSE1/DTL/MAP3K20/RFWD3/TAOK1/RINT1/CLSPN/E2F8/WDR76/RHNO1/BRIP1/E2F7/EME1/TIPRL/EIF2AK4	40
BP	GO:1903046	meiotic cell cycle process	47/1752	188/18670	2.78982e-10	3.32843e-08	2.75206e-08	ATRX/BRCA2/BUB1/BUB1B/CDC20/CDC25A/CDC25C/CKS2/ERCC4/FANCA/FANCD2/GPR3/MSH6/HSPA2/LIF/MSH3/PLK1/RAD1/RAD51/AURKA/TOP2A/TTK/RAD54L/PTTG1/TRIP13/ESPL1/NCAPD2/SMC4/ACTR3/ACTR2/RAD50/SMC2/NCAPD3/NCAPH/FBXO5/NDC1/FIGNL1/RMI1/KIF18A/NUF2/BRIP1/MND1/MASTL/EME1/SGO2/SGO1/ASPM	47
BP	GO:0010212	response to ionizing radiation	40/1752	147/18670	3.93951e-10	4.60607e-08	3.80847e-08	ANXA1/ATR/CCND1/BRCA1/BRCA2/CASP3/CBL/ECT2/ELK1/FANCD2/CXCL10/MSH2/PRKAA1/PRKDC/RAD1/RAD51/RRM1/SFRP2/SNAI2/TP53/TP53BP1/WRN/XRCC2/XRCC5/RAD54L/CLOCK/NAMPT/RAD51AP1/TOPBP1/PAXIP1/NIPBL/INTS7/MAP3K20/RFWD3/TIGAR/FIGNL1/AEN/RHNO1/LZIC/IKBIP	40
BP	GO:0007098	centrosome cycle	36/1752	124/18670	4.17048e-10	4.78051e-08	3.9527e-08	BRCA1/BRCA2/CCNF/CDK1/CDK2/CHEK1/KIF11/PPP1R12A/NEK2/PKD2/PLK1/STIL/AURKA/XPO1/XRCC2/ALMS1/ROCK2/CEP135/PCLAF/CKAP5/PLK4/PLK2/CEP152/USP33/SYNE2/POC1A/NIN/CEP192/HAUS2/MAP9/CEP295/SSX2IP/UBXN2B/SGO1/WDR62/GEN1	36
BP	GO:0033046	negative regulation of sister chromatid segregation	20/1752	44/18670	4.87105e-10	5.47619e-08	4.52791e-08	APC/ATRX/BUB1/BUB1B/CCNB1/CDC20/CENPF/MAD2L1/PLK1/TPR/TTK/TNKS/ZW10/AURKB/PTTG1/TRIP13/ESPL1/NDC80/FBXO5/GEN1	20
BP	GO:0051985	negative regulation of chromosome segregation	20/1752	45/18670	7.99599e-10	8.81973e-08	7.29247e-08	APC/ATRX/BUB1/BUB1B/CCNB1/CDC20/CENPF/MAD2L1/PLK1/TPR/TTK/TNKS/ZW10/AURKB/PTTG1/TRIP13/ESPL1/NDC80/FBXO5/GEN1	20
BP	GO:1901991	negative regulation of mitotic cell cycle phase transition	55/1752	248/18670	1.11747e-09	1.20976e-07	1.00028e-07	APC/CCND1/BRCA1/BUB1/BUB1B/CASP2/CCNB1/CDK1/CDC6/CDC20/CDC25C/CDK2/CDK4/CDK6/CDKN2C/CENPF/E2F1/EP300/EZH2/MAD2L1/ORC1/PCNA/PKD2/PLK1/PRKDC/RB1/RBL1/RBL2/AURKA/TP53/TPR/TTK/WEE1/CUL1/ZW10/AURKB/TRIP13/NDC80/PLK2/TOPBP1/FAM107A/CNOT1/PSME4/FBXO5/GTSE1/RFWD3/GJC2/TAOK1/RINT1/CLSPN/ZNF655/CDC73/E2F8/E2F7/GEN1	55
BP	GO:0007064	mitotic sister chromatid cohesion	14/1752	23/18670	1.41354e-09	1.50247e-07	1.24229e-07	ATRX/CDC20/RB1/SMC1A/TNKS/PDS5B/SMC5/PDS5A/NIPBL/DSCC1/NAA50/HASPIN/CDCA5/SGO1	14
BP	GO:0033048	negative regulation of mitotic sister chromatid segregation	19/1752	42/18670	1.46571e-09	1.5301e-07	1.26514e-07	APC/ATRX/BUB1/BUB1B/CCNB1/CDC20/CENPF/MAD2L1/PLK1/TPR/TTK/TNKS/ZW10/AURKB/PTTG1/TRIP13/NDC80/FBXO5/GEN1	19
BP	GO:0032392	DNA geometric change	34/1752	119/18670	2.01242e-09	2.06396e-07	1.70656e-07	ANXA1/ATRX/CHD1/DDX3X/DHX9/HMGB3/MCM2/MCM4/MCM6/RAD51/RECQL/RFC3/TOP2A/TP53/WRN/XRCC5/CDC45/RAD54L/CUL4B/GINS1/RAD50/ASCC3/POT1/GINS2/ERCC6L/RAD18/SMARCAD1/DSCC1/CHD9/BRIP1/CHD6/GINS4/MCM8/DHX36	34
BP	GO:1901988	negative regulation of cell cycle phase transition	57/1752	267/18670	2.51964e-09	2.53963e-07	2.09986e-07	APC/CCND1/BRCA1/BUB1/BUB1B/CASP2/CCNB1/CDK1/CDC6/CDC20/CDC25C/CDK2/CDK4/CDK6/CDKN2C/CENPF/CHEK1/E2F1/EP300/EZH2/MAD2L1/ORC1/PCNA/PKD2/PLK1/PRKDC/RB1/RBL1/RBL2/AURKA/TP53/TPR/TTK/WEE1/CUL1/ZW10/AURKB/TRIP13/NDC80/PLK2/TOPBP1/FAM107A/CNOT1/PSME4/FBXO5/GTSE1/DTL/RFWD3/GJC2/TAOK1/RINT1/CLSPN/ZNF655/CDC73/E2F8/E2F7/GEN1	57
BP	GO:0045931	positive regulation of mitotic cell cycle	41/1752	163/18670	3.11354e-09	3.08505e-07	2.55083e-07	ANXA1/CCND1/BRCA2/CCNB1/CCND2/CDK1/CDC6/CDC25A/CDC25C/CDK4/DDX3X/EGFR/HSPA2/MAD2L1/PKN2/RB1/RPS6KB1/AURKA/ADAM17/TPR/CDC7/CDC45/CUL4B/CUL3/KIF20B/ESPL1/DLGAP5/NDC80/UBE2C/SMC5/NIPBL/ANKRD17/FBXO5/NUSAP1/DTL/PHIP/KMT2E/CDCA5/UBXN2B/GEN1/MIR590	41
BP	GO:0031023	microtubule organizing center organization	36/1752	133/18670	3.42307e-09	3.33521e-07	2.75767e-07	BRCA1/BRCA2/CCNF/CDK1/CDK2/CHEK1/KIF11/PPP1R12A/NEK2/PKD2/PLK1/STIL/AURKA/XPO1/XRCC2/ALMS1/ROCK2/CEP135/PCLAF/CKAP5/PLK4/PLK2/CEP152/USP33/SYNE2/POC1A/NIN/CEP192/HAUS2/MAP9/CEP295/SSX2IP/UBXN2B/SGO1/WDR62/GEN1	36
BP	GO:1902806	regulation of cell cycle G1/S phase transition	47/1752	202/18670	3.53219e-09	3.38512e-07	2.79894e-07	ANXA1/ATP2B4/CCND1/CASP2/CCNB1/CCND2/CDK1/CDC6/CDC25C/CDK2/CDK4/CDK6/CDKN2C/DDX3X/E2F1/EGFR/EP300/EZH2/PCNA/PKD2/PRKDC/RB1/RBL1/RBL2/AURKA/ADAM17/TAF1/TP53/WEE1/CDC45/CUL4B/KIF14/PLK2/FAM107A/CNOT1/ANKRD17/GTSE1/RFWD3/KMT2E/TCIM/GJC2/ZNF655/CDC73/E2F8/FAM83D/E2F7/MIR590	47
BP	GO:0007062	sister chromatid cohesion	23/1752	63/18670	4.66523e-09	4.38721e-07	3.62751e-07	ATRX/BUB1/BUB1B/CDC20/FEN1/PLK1/RB1/SMC1A/TNKS/ESPL1/STAG1/STAG2/PDS5B/SMC5/PDS5A/NIPBL/DSCC1/NAA50/HASPIN/CDCA5/SGO2/SGO1/ESCO2	23
BP	GO:0008608	attachment of spindle microtubules to kinetochore	16/1752	32/18670	4.72792e-09	4.38721e-07	3.62751e-07	APC/CCNB1/CENPE/ECT2/NEK2/RB1/AURKB/NDC80/SPAG5/KIF2C/RACGAP1/KNL1/NUF2/KNSTRN/SGO1/CHAMP1	16
BP	GO:0000725	recombinational repair	36/1752	135/18670	5.29436e-09	4.83607e-07	3.99864e-07	BRCA1/BRCA2/CHEK1/ERCC4/FEN1/MCM2/MCM4/MCM6/RAD51/RBBP8/RECQL/REV3L/TP53BP1/WRN/XRCC2/CDC7/CDC45/RAD54L/TIMELESS/ACTR2/RAD50/RAD51AP1/SMC5/SMCHD1/NIPBL/GINS2/PARPBP/RFWD3/RIF1/FIGNL1/RMI1/RHNO1/GINS4/MCM8/RMI2/GEN1	36
BP	GO:0000083	regulation of transcription involved in G1/S transition of mitotic cell cycle	15/1752	29/18670	7.90228e-09	7.10719e-07	5.87648e-07	BACH1/CDC6/DHFR/E2F1/NPAT/ORC1/PCNA/POLA1/RB1/RRM2/TYMS/CDC45/FBXO5/E2F7/DHFRP1	15
BP	GO:0051225	spindle assembly	31/1752	108/18670	9.0816e-09	7.99999e-07	6.61468e-07	BIRC5/CDC20/FLNA/KIF2A/KIF11/KIFC1/MYBL2/NEK2/PLK1/AURKA/TPR/SMC1A/TNKS/AURKB/KIF23/NCOR1/STAG1/SPAG5/STAG2/NEK6/TPX2/KIF4A/FBXO5/RACGAP1/GPSM2/MAP10/CEP192/HAUS2/MAP9/ASPM/CENPW	31
BP	GO:0051784	negative regulation of nuclear division	22/1752	60/18670	9.16865e-09	7.99999e-07	6.61468e-07	APC/ATRX/BUB1/BUB1B/CCNB1/CDC20/CENPF/CHEK1/LIF/MAD2L1/PLK1/RAD1/TPR/TTK/TNKS/ZW10/AURKB/PTTG1/TRIP13/NDC80/FBXO5/GEN1	22
BP	GO:0090307	mitotic spindle assembly	21/1752	56/18670	1.24785e-08	1.05819e-06	8.74953e-07	BIRC5/CDC20/FLNA/KIF2A/KIF11/KIFC1/MYBL2/NEK2/PLK1/TPR/SMC1A/AURKB/KIF23/STAG1/STAG2/TPX2/KIF4A/RACGAP1/MAP10/CEP192/MAP9	21
BP	GO:0042770	signal transduction in response to DNA damage	35/1752	133/18670	1.24898e-08	1.05819e-06	8.74953e-07	ATR/ATRX/BRCA1/BRCA2/CASP2/CCNB1/CDK1/CDC25C/CDK2/CHEK1/E2F1/EP300/FOXM1/PCNA/PLK1/PRKDC/RBL2/SNAI2/AURKA/TP53/PPM1D/PLK2/PAXIP1/CNOT1/GTSE1/DTL/SMYD2/RINT1/MARCHF7/E2F8/E2F7/SPRED1/SPRED2/ACER2/SPRED3	35
BP	GO:2000045	regulation of G1/S transition of mitotic cell cycle	43/1752	184/18670	1.40951e-08	1.17714e-06	9.733e-07	ANXA1/CCND1/CASP2/CCNB1/CCND2/CDK1/CDC6/CDC25C/CDK2/CDK4/CDK6/CDKN2C/DDX3X/E2F1/EGFR/EP300/EZH2/PCNA/PKD2/PRKDC/RB1/RBL1/RBL2/AURKA/ADAM17/TP53/WEE1/CDC45/CUL4B/KIF14/PLK2/FAM107A/CNOT1/ANKRD17/GTSE1/RFWD3/KMT2E/GJC2/ZNF655/CDC73/E2F8/E2F7/MIR590	43
BP	GO:2001251	negative regulation of chromosome organization	37/1752	146/18670	1.45412e-08	1.19087e-06	9.84655e-07	APC/ATRX/BRCA1/BUB1/BUB1B/CCNB1/CDC20/CENPF/DNMT1/ERCC4/MAD2L1/MCM2/PLK1/KDM5A/TOP2A/TPR/TTK/XRCC5/TNKS/ZW10/AURKB/PTTG1/TRIP13/TRIP12/ESPL1/RAD50/NDC80/SMG6/POT1/FBXO5/ATAD2/UBR5/GNL3L/BCOR/PRMT6/DCP2/GEN1	37
BP	GO:0032508	DNA duplex unwinding	31/1752	110/18670	1.46669e-08	1.19087e-06	9.84655e-07	ANXA1/ATRX/CHD1/DDX3X/DHX9/MCM2/MCM4/MCM6/RAD51/RECQL/RFC3/TOP2A/WRN/XRCC5/CDC45/CUL4B/GINS1/RAD50/ASCC3/POT1/GINS2/ERCC6L/RAD18/SMARCAD1/DSCC1/CHD9/BRIP1/CHD6/GINS4/MCM8/DHX36	31
BP	GO:0000724	double-strand break repair via homologous recombination	35/1752	134/18670	1.53983e-08	1.23313e-06	1.0196e-06	BRCA1/BRCA2/CHEK1/ERCC4/FEN1/MCM2/MCM4/MCM6/RAD51/RBBP8/RECQL/REV3L/TP53BP1/WRN/XRCC2/CDC7/CDC45/RAD54L/TIMELESS/ACTR2/RAD50/RAD51AP1/SMC5/SMCHD1/NIPBL/GINS2/PARPBP/RFWD3/RIF1/FIGNL1/RMI1/GINS4/MCM8/RMI2/GEN1	35
BP	GO:0140013	meiotic nuclear division	41/1752	172/18670	1.66423e-08	1.30041e-06	1.07523e-06	BRCA2/BUB1/BUB1B/CDC20/CKS2/ERCC4/FANCA/FANCD2/GPR3/HSPA2/LIF/MSH3/PLK1/RAD1/RAD51/AURKA/TOP2A/TTK/RAD54L/PTTG1/TRIP13/ESPL1/SMC4/ACTR3/ACTR2/RAD50/SMC2/NCAPH/FBXO5/NDC1/FIGNL1/RMI1/KIF18A/NUF2/BRIP1/MND1/MASTL/EME1/SGO2/SGO1/ASPM	41
BP	GO:0045839	negative regulation of mitotic nuclear division	20/1752	52/18670	1.66834e-08	1.30041e-06	1.07523e-06	APC/ATRX/BUB1/BUB1B/CCNB1/CDC20/CENPF/CHEK1/MAD2L1/PLK1/TPR/TTK/TNKS/ZW10/AURKB/PTTG1/TRIP13/NDC80/FBXO5/GEN1	20
BP	GO:2000816	negative regulation of mitotic sister chromatid separation	17/1752	39/18670	2.1468e-08	1.65134e-06	1.36539e-06	APC/BUB1/BUB1B/CCNB1/CDC20/CENPF/MAD2L1/PLK1/TPR/TTK/ZW10/AURKB/PTTG1/TRIP13/NDC80/FBXO5/GEN1	17
BP	GO:1901989	positive regulation of cell cycle phase transition	30/1752	106/18670	2.24238e-08	1.70246e-06	1.40766e-06	ANXA1/CCND1/CCNB1/CCND2/CDK1/CDC6/CDC25A/CDC25C/CDK4/DDX3X/EGFR/EZH2/HSPA2/RB1/ADAM17/CDC7/CDC45/CUL4B/CUL3/ESPL1/DLGAP5/UBE2C/ANKRD17/FBXO5/DTL/KMT2E/CDC73/FAM83D/CDCA5/MIR590	30
BP	GO:0030330	DNA damage response, signal transduction by p53 class mediator	30/1752	107/18670	2.83913e-08	2.12789e-06	1.75942e-06	ATR/ATRX/BRCA1/BRCA2/CASP2/CCNB1/CDK1/CDC25C/CDK2/E2F1/EP300/FOXM1/PCNA/RBL2/SNAI2/AURKA/TP53/PPM1D/PLK2/PAXIP1/CNOT1/GTSE1/SMYD2/MARCHF7/E2F8/E2F7/SPRED1/SPRED2/ACER2/SPRED3	30
BP	GO:1905819	negative regulation of chromosome separation	17/1752	40/18670	3.4076e-08	2.52163e-06	2.08497e-06	APC/BUB1/BUB1B/CCNB1/CDC20/CENPF/MAD2L1/PLK1/TPR/TTK/ZW10/AURKB/PTTG1/TRIP13/NDC80/FBXO5/GEN1	17
BP	GO:1901992	positive regulation of mitotic cell cycle phase transition	27/1752	91/18670	3.76842e-08	2.75377e-06	2.27692e-06	ANXA1/CCND1/CCNB1/CCND2/CDK1/CDC6/CDC25A/CDC25C/CDK4/DDX3X/EGFR/HSPA2/RB1/ADAM17/CDC7/CDC45/CUL4B/CUL3/ESPL1/DLGAP5/UBE2C/ANKRD17/FBXO5/DTL/KMT2E/CDCA5/MIR590	27
BP	GO:0030198	extracellular matrix organization	68/1752	368/18670	3.94497e-08	2.84607e-06	2.35323e-06	ATP7A/BGN/SERPINH1/COL1A1/COL1A2/COL3A1/COL4A1/COL4A2/COL5A1/COL5A2/COL6A2/COL8A1/COL12A1/NCAN/DAG1/ELN/ETS1/FMOD/FN1/HSPG2/TNC/ITGA1/ITGA3/ITGA4/ITGA5/ITGA7/ITGAV/ITGB1/ITGB8/KDR/LAMA2/LAMB1/LAMC1/LOX/LOXL2/LUM/MMP2/MMP9/MMP14/MMP16/NID1/TNFRSF11B/SERPINE1/PTX3/RB1/SFRP2/TGFB2/TGFBI/TGFBR1/THBS1/TIMP1/NR2E1/COL14A1/VWF/PXDN/ADAM12/ADAM19/PDPN/POSTN/MMP24/NID2/HAPLN2/HPSE2/CREB3L1/OLFML2A/NPNT/SH…	68
BP	GO:0045841	negative regulation of mitotic metaphase/anaphase transition	16/1752	36/18670	3.99209e-08	2.84607e-06	2.35323e-06	APC/BUB1/BUB1B/CCNB1/CDC20/CENPF/MAD2L1/PLK1/TPR/TTK/ZW10/AURKB/TRIP13/NDC80/FBXO5/GEN1	16
BP	GO:0000910	cytokinesis	40/1752	171/18670	4.33461e-08	3.05303e-06	2.52436e-06	APC/BRCA2/CDC6/CENPA/ECT2/INCENP/MYH10/PLK1/SEPTIN4/PKN2/RASA1/ROCK1/SON/AURKA/CUL3/PRC1/USP8/AURKB/ROCK2/KIF23/KIF20B/ESPL1/KIF14/ACTR3/ACTR2/KIF20A/PLK2/KIF4A/CKAP2/RACGAP1/SH3GLB1/NUSAP1/MAP10/CEP55/PRPF40A/BIRC6/E2F8/MAP9/KLHL13/E2F7	40
BP	GO:0009411	response to UV	35/1752	141/18670	6.21235e-08	4.3235e-06	3.57483e-06	ATR/CCND1/BRCA2/CASP3/CDC25A/CHEK1/EGFR/EIF2S1/EP300/ERCC4/FEN1/MSH6/MSH2/PCNA/POLH/PRKAA1/PTN/RBL2/RO60/TAF1/TP53/USP1/WRN/CUL4B/AURKB/PCLAF/POLD3/POLK/DTL/PBK/RAD18/RHNO1/SDE2/DHX36/EIF2AK4	35
BP	GO:1902100	negative regulation of metaphase/anaphase transition of cell cycle	16/1752	37/18670	6.42151e-08	4.41649e-06	3.65171e-06	APC/BUB1/BUB1B/CCNB1/CDC20/CENPF/MAD2L1/PLK1/TPR/TTK/ZW10/AURKB/TRIP13/NDC80/FBXO5/GEN1	16
BP	GO:0034502	protein localization to chromosome	25/1752	82/18670	6.59551e-08	4.48341e-06	3.70705e-06	ATR/ATRX/BRCA2/CCT6A/CDK1/CENPA/EZH2/MSH2/PLK1/RB1/TTK/XRCC5/TNKS/ZW10/AURKB/NDC80/NIPBL/POT1/GNL3L/KNL1/HASPIN/MCM8/CDCA5/ESCO2/CHAMP1	25
BP	GO:2001020	regulation of response to DNA damage stimulus	46/1752	214/18670	6.85999e-08	4.6096e-06	3.81138e-06	ATR/BRCA1/CHEK1/CRY1/DHX9/EGFR/ERCC4/FOXM1/PCNA/POLH/PRKDC/RAD51/SFRP2/SNAI2/TP53/TP53BP1/USP1/NSD2/DEK/TIMELESS/TRIP12/BCLAF1/ACTR2/RAD51AP1/PAXIP1/SMG1/SMCHD1/FBXO5/UBR5/PARPBP/RFWD3/RIF1/SMYD2/TIGAR/RINT1/FIGNL1/MARCHF7/WDR76/PARP9/RMI2/DTX3L/SPRED1/SPRED2/DDIAS/RNF169/SPRED3	46
BP	GO:0007094	mitotic spindle assembly checkpoint	15/1752	34/18670	1.20097e-07	7.71523e-06	6.37923e-06	APC/BUB1/BUB1B/CCNB1/CDC20/CENPF/MAD2L1/PLK1/TPR/TTK/ZW10/AURKB/TRIP13/NDC80/GEN1	15
BP	GO:0031577	spindle checkpoint	15/1752	34/18670	1.20097e-07	7.71523e-06	6.37923e-06	APC/BUB1/BUB1B/CCNB1/CDC20/CENPF/MAD2L1/PLK1/TPR/TTK/ZW10/AURKB/TRIP13/NDC80/GEN1	15
BP	GO:0071173	spindle assembly checkpoint	15/1752	34/18670	1.20097e-07	7.71523e-06	6.37923e-06	APC/BUB1/BUB1B/CCNB1/CDC20/CENPF/MAD2L1/PLK1/TPR/TTK/ZW10/AURKB/TRIP13/NDC80/GEN1	15
BP	GO:0071174	mitotic spindle checkpoint	15/1752	34/18670	1.20097e-07	7.71523e-06	6.37923e-06	APC/BUB1/BUB1B/CCNB1/CDC20/CENPF/MAD2L1/PLK1/TPR/TTK/ZW10/AURKB/TRIP13/NDC80/GEN1	15
BP	GO:0000079	regulation of cyclin-dependent protein serine/threonine kinase activity	28/1752	102/18670	1.33278e-07	8.46894e-06	7.00243e-06	APC/CCND1/CASP3/CCNA2/CCNB1/CCND2/CCNF/CCNT1/CDC6/CDC25A/CDC25C/CDK4/CDKN1C/CDKN2C/CDKN3/CKS1B/CKS2/EGFR/PKD2/PLK1/PROX1/ADAM17/NR2F2/PKMYT1/LATS1/CCNB2/IPO7/CCNYL1	28
BP	GO:0006275	regulation of DNA replication	29/1752	108/18670	1.35051e-07	8.48935e-06	7.0193e-06	ATR/ATRX/BRCA2/CCNA2/CDK1/CDC6/CDK2/DHX9/EGFR/MSH6/MSH3/PCNA/RFC3/TP53/SMC1A/CDC7/TIMELESS/STAG2/DBF4/PDS5A/ANKRD17/FBXO5/CCDC88A/USP37/DSCC1/E2F8/E2F7/ESCO2/ZBTB38	29
BP	GO:0072395	signal transduction involved in cell cycle checkpoint	23/1752	74/18670	1.48179e-07	9.21548e-06	7.61969e-06	BRCA1/CASP2/CCNB1/CDK1/CDC25C/CDK2/CHEK1/E2F1/EP300/PCNA/PLK1/PRKDC/RBL2/SOX11/AURKA/TP53/PLK2/CNOT1/GTSE1/DTL/RINT1/E2F8/E2F7	23
BP	GO:1902749	regulation of cell cycle G2/M phase transition	45/1752	213/18670	1.6139e-07	9.9314e-06	8.21164e-06	CCND1/BRCA1/CCNB1/CDK1/CDC6/CDC25A/CDC25C/CDK2/CDK4/CENPF/CHEK1/HMMR/HSPA2/NEK2/ORC1/PLK1/PRKAR2B/AURKA/TP53/YWHAG/ALMS1/CDC7/CUL1/AURKB/CEP135/CKAP5/KIF14/AKAP9/TUBB4A/PLK4/TOPBP1/TPX2/PAXIP1/CEP152/PSME4/FBXO5/GTSE1/DTL/CEP192/HAUS2/TAOK1/RINT1/CLSPN/CEP41/NEDD1	45
BP	GO:0006310	DNA recombination	56/1752	292/18670	1.72816e-07	1.05238e-05	8.70144e-06	BRCA1/BRCA2/CHEK1/ERCC4/FEN1/MSH6/HMGB3/KPNA2/MCM2/MCM4/MCM6/MSH2/MSH3/PRKDC/RAD51/RBBP8/RECQL/REV3L/TFRC/TOP2A/TP53BP1/NSD2/WRN/XRCC2/XRCC5/CDC7/CDC45/RAD54L/TIMELESS/EXO1/TRIP13/DCAF1/ACTR2/RAD50/RAD51AP1/PAXIP1/NCOA6/SMC5/SMCHD1/NIPBL/GINS2/PARPBP/RFWD3/RIF1/SMARCAD1/FIGNL1/SMC6/RMI1/RHNO1/BRIP1/MND1/GINS4/MCM8/RMI2/EME1/GEN1	56
BP	GO:0022604	regulation of cell morphogenesis	81/1752	484/18670	1.84756e-07	1.11349e-05	9.20674e-06	ANXA1/APOE/RND3/BMPR2/CDH2/CDH4/DAG1/DCC/DIAPH1/EPB41/EPHA4/EPS8/FLNA/FN1/GBP1/GSK3B/ITGA7/KDR/CAPRIN1/MAG/MAP1B/MKLN1/MSN/MYH10/NEDD9/NGFR/NRCAM/OPA1/P2RY1/PLXNA1/PLXNA2/POU3F2/PTN/PTPRO/RASA1/ROBO1/ROBO2/CCL3/SHOX2/CNTN2/NR2E1/UBE3A/VEGFA/LRP8/NRP1/LIMD1/SEMA5A/ZMYM4/ACTR2/PLXNC1/PDPN/POSTN/FERMT2/LZTS1/NLGN1/ARC/ADNP/SIPA1L1/FBXW8/NIN/TNFRSF12A/FBLIM1/PHIP/TBCCD1/PRPF40A/PARVA/RHOJ/STRIP2/ERMN…	81
BP	GO:0043062	extracellular structure organization	73/1752	422/18670	1.99736e-07	1.19149e-05	9.85163e-06	APOE/ATP7A/BGN/SERPINH1/COL1A1/COL1A2/COL3A1/COL4A1/COL4A2/COL5A1/COL5A2/COL6A2/COL8A1/COL12A1/NCAN/DAG1/ELN/ETS1/FMOD/FN1/HSPG2/TNC/ITGA1/ITGA3/ITGA4/ITGA5/ITGA7/ITGAV/ITGB1/ITGB8/KDR/LAMA2/LAMB1/LAMC1/LOX/LOXL2/LUM/MMP2/MMP9/MMP14/MMP16/NID1/TNFRSF11B/SERPINE1/PLAGL2/PTX3/RB1/SDC1/SFRP2/SOAT1/TGFB2/TGFBI/TGFBR1/THBS1/TIMP1/NR2E1/COL14A1/VWF/PXDN/ADAM12/ADAM19/PDPN/POSTN/MMP24/NID2/HAPLN2/HPSE2/…	73
BP	GO:0022616	DNA strand elongation	13/1752	27/18670	2.38282e-07	1.40707e-05	1.16341e-05	FEN1/MCM4/PCNA/POLA1/RFC3/GINS1/RAD50/POLD3/POT1/GINS2/DCLRE1B/GINS4/RNASEH1	13
BP	GO:0044786	cell cycle DNA replication	22/1752	71/18670	2.92177e-07	1.70807e-05	1.41229e-05	ATRX/BRCA2/FEN1/MSH6/MCM2/MCM4/MCM6/PCNA/POLA1/PRIM1/RAD51/RFC3/SMC1A/CDC7/CDC45/GINS1/POLD3/STAG2/DBF4/FBXO5/E2F8/E2F7	22
BP	GO:0008360	regulation of cell shape	35/1752	150/18670	3.16525e-07	1.81756e-05	1.50283e-05	ANXA1/RND3/DAG1/DIAPH1/EPB41/EPS8/FN1/ITGA7/KDR/MKLN1/MSN/MYH10/P2RY1/PLXNA1/PLXNA2/PTN/RASA1/CCL3/VEGFA/LIMD1/PLXNC1/PDPN/FERMT2/FBLIM1/PHIP/TBCCD1/PRPF40A/PARVA/RHOJ/STRIP2/ERMN/SHROOM3/PLXNA4/ARHGAP18/BRWD3	35
BP	GO:0044774	mitotic DNA integrity checkpoint	28/1752	106/18670	3.20234e-07	1.81756e-05	1.50283e-05	CCND1/CASP2/CCNB1/CDK1/CDC6/CDC25C/CDK2/E2F1/EP300/MSH2/ORC1/PCNA/PRKDC/RBL2/AURKA/TOP2A/TP53/PLK2/TOPBP1/CNOT1/GTSE1/RFWD3/TAOK1/RINT1/CLSPN/E2F8/E2F7/EME1	28
BP	GO:1904029	regulation of cyclin-dependent protein kinase activity	28/1752	106/18670	3.20234e-07	1.81756e-05	1.50283e-05	APC/CCND1/CASP3/CCNA2/CCNB1/CCND2/CCNF/CCNT1/CDC6/CDC25A/CDC25C/CDK4/CDKN1C/CDKN2C/CDKN3/CKS1B/CKS2/EGFR/PKD2/PLK1/PROX1/ADAM17/NR2F2/PKMYT1/LATS1/CCNB2/IPO7/CCNYL1	28
BP	GO:2000134	negative regulation of G1/S transition of mitotic cell cycle	31/1752	125/18670	3.54119e-07	1.99055e-05	1.64586e-05	CCND1/CASP2/CCNB1/CDK1/CDC25C/CDK2/CDK4/CDK6/CDKN2C/E2F1/EP300/EZH2/PCNA/PKD2/PRKDC/RB1/RBL1/RBL2/AURKA/TP53/WEE1/PLK2/FAM107A/CNOT1/GTSE1/RFWD3/GJC2/ZNF655/CDC73/E2F8/E2F7	31
BP	GO:0001503	ossification	69/1752	398/18670	3.94392e-07	2.19582e-05	1.81559e-05	ADAR/JAG1/ATP2B1/BMPR2/CDH11/CDK6/CLTC/COL1A1/COL1A2/COL5A2/DHX9/SLC26A2/EGFR/EPHA2/EXT2/GDF10/HIF1A/TNC/IARS1/IGFBP3/IGFBP5/LOX/LTF/SMAD1/SMAD5/MGP/MMP2/MMP14/MMP16/PTN/RORB/CCL3/SFRP2/SHOX2/SNAI2/SOX11/SP3/STC1/TGFB2/KLF10/TPM4/TRAF6/FZD1/DCHS1/CCN4/LIMD1/DDX21/EIF2AK3/SYNCRIP/CHSY1/SNRNP200/SATB2/DNAJC13/NIPBL/FBXO5/SUCO/BCOR/TXLNG/BCAP29/CCDC47/TWSG1/FIGNL1/XYLT1/CREB3L1/CTHRC1/DHX36/ANO6/NPN…	69
BP	GO:0031589	cell-substrate adhesion	63/1752	354/18670	4.92975e-07	2.68664e-05	2.22141e-05	ACTN1/JAG1/ANGPT2/CDK6/COL1A1/COL3A1/COL8A1/DAG1/EPHA3/FER/FLNA/FN1/GBP1/GCNT2/GSK3B/HOXA7/HSPG2/ITGA1/ITGA3/ITGA4/ITGA5/ITGA7/ITGAV/ITGB1/KDR/LAMB1/LAMC1/MKLN1/MMP14/NEDD9/NID1/SERPINE1/PLAU/PTN/PTPRO/RASA1/ROCK1/THBS1/VCL/VEGFA/VWF/PIP5K1A/CASK/ADAM9/IQGAP1/NRP1/ROCK2/KIF14/PDPN/POSTN/FERMT2/FAM107A/NID2/TNFRSF12A/TRPM7/PARVA/EPB41L5/PLEKHA2/PEAK1/EMILIN3/NPNT/ACER2/NEXMIF	63
BP	GO:0000281	mitotic cytokinesis	22/1752	73/18670	5.0093e-07	2.68664e-05	2.22141e-05	APC/BRCA2/CENPA/ECT2/INCENP/MYH10/PLK1/RASA1/ROCK1/SON/USP8/ROCK2/KIF23/KIF20B/ESPL1/KIF20A/KIF4A/CKAP2/RACGAP1/NUSAP1/CEP55/MAP9	22
BP	GO:0072401	signal transduction involved in DNA integrity checkpoint	22/1752	73/18670	5.0093e-07	2.68664e-05	2.22141e-05	BRCA1/CASP2/CCNB1/CDK1/CDC25C/CDK2/CHEK1/E2F1/EP300/PCNA/PLK1/PRKDC/RBL2/AURKA/TP53/PLK2/CNOT1/GTSE1/DTL/RINT1/E2F8/E2F7	22
BP	GO:0072422	signal transduction involved in DNA damage checkpoint	22/1752	73/18670	5.0093e-07	2.68664e-05	2.22141e-05	BRCA1/CASP2/CCNB1/CDK1/CDC25C/CDK2/CHEK1/E2F1/EP300/PCNA/PLK1/PRKDC/RBL2/AURKA/TP53/PLK2/CNOT1/GTSE1/DTL/RINT1/E2F8/E2F7	22
BP	GO:0007050	cell cycle arrest	47/1752	237/18670	6.1189e-07	3.25192e-05	2.6888e-05	APC/BARD1/CCND1/BRCA1/CASP2/CCNB1/CDK1/CDC25C/CDK2/CDK4/CDK6/CDKN1C/CDKN2C/CDKN3/E2F1/EIF4G2/EP300/FOXM1/MTOR/GAS1/INSM1/MSH2/NOTCH2/PCNA/PKD2/PRKAA1/RB1/RBL2/AURKA/TGFB2/TGFBR1/THBS1/TP53/KIF20B/PLK2/CNOT1/HBP1/GTSE1/MAP3K20/PRR11/KMT2E/E2F8/UHMK1/E2F7/SDE2/DDIAS/EIF2AK4	47
BP	GO:0010639	negative regulation of organelle organization	68/1752	395/18670	6.22525e-07	3.27863e-05	2.71089e-05	ADD2/APC/ATRX/BOK/BRCA1/BUB1/BUB1B/CAPZA2/CCNB1/CCNF/CDC20/CENPF/CHEK1/DNMT1/EPS8/ERCC4/LIF/LMAN1/MAD2L1/MAP1B/MCM2/MET/MID1/NEK2/OPA1/PLK1/TWF1/RAD1/KDM5A/TOP2A/TP53/TPR/TTK/XRCC5/TNKS/ZW10/AURKB/PTTG1/TRIP13/TRIP12/ESPL1/RAD50/TUBB4A/NDC80/ARFGEF1/TMSB15A/CAMSAP2/SMG6/POT1/FBXO5/NUPR1/CKAP2/ATAD2/UBR5/LIMA1/GNL3L/BCOR/PRMT6/TIGAR/CRACD/TAOK1/FHOD3/TRIM9/LRRK2/MTPN/SMCR8/DCP2/GEN1	68
BP	GO:0051383	kinetochore organization	11/1752	21/18670	6.98504e-07	3.64594e-05	3.0146e-05	CENPA/CENPE/CENPF/SMC4/NDC80/SMC2/CENPN/CENPK/CENPH/NUF2/CENPW	11
BP	GO:0010389	regulation of G2/M transition of mitotic cell cycle	41/1752	196/18670	7.42488e-07	3.84122e-05	3.17606e-05	CCND1/BRCA1/CCNB1/CDK1/CDC6/CDC25A/CDC25C/CDK2/CDK4/CENPF/HMMR/HSPA2/NEK2/ORC1/PLK1/PRKAR2B/AURKA/YWHAG/ALMS1/CDC7/CUL1/AURKB/CEP135/CKAP5/KIF14/AKAP9/TUBB4A/PLK4/TOPBP1/TPX2/CEP152/PSME4/FBXO5/DTL/CEP192/HAUS2/TAOK1/RINT1/CLSPN/CEP41/NEDD1	41
BP	GO:0018209	peptidyl-serine modification	58/1752	322/18670	9.25773e-07	4.74743e-05	3.92535e-05	ATP2B4/ATR/BGN/BRAF/CAMK2D/CAV1/CCNB1/CDK1/CDK2/CSNK1A1/CSNK1G3/EGFR/MTOR/GALNT2/GSK3B/LIF/MARK1/PDE4D/PDK3/PIK3CA/PLK1/PRKAA1/PRKCI/PKN2/PRKDC/ROCK1/RPS6KA3/RPS6KB1/SFRP2/AURKA/TAF1/TGFBR1/TOP1/TTK/VEGFA/CDC7/TNKS/LATS1/AURKB/EIF2AK3/ROCK2/TLK1/AKAP9/TENM1/SPRY2/PLK2/NEK6/LMTK2/SMG1/CSNK1G1/CLSPN/NSD1/POGLUT2/MASTL/DOCK7/LRRK2/UHMK1/POGLUT3	58
BP	GO:0030199	collagen fibril organization	18/1752	54/18670	1.04729e-06	5.3239e-05	4.40199e-05	ATP7A/SERPINH1/COL1A1/COL1A2/COL3A1/COL5A1/COL5A2/COL12A1/FMOD/LOX/LOXL2/LUM/RB1/SFRP2/TGFB2/TGFBR1/COL14A1/PXDN	18
BP	GO:1902807	negative regulation of cell cycle G1/S phase transition	31/1752	131/18670	1.06294e-06	5.35683e-05	4.42922e-05	CCND1/CASP2/CCNB1/CDK1/CDC25C/CDK2/CDK4/CDK6/CDKN2C/E2F1/EP300/EZH2/PCNA/PKD2/PRKDC/RB1/RBL1/RBL2/AURKA/TP53/WEE1/PLK2/FAM107A/CNOT1/GTSE1/RFWD3/GJC2/ZNF655/CDC73/E2F8/E2F7	31
BP	GO:0061640	cytoskeleton-dependent cytokinesis	26/1752	100/18670	1.16201e-06	5.80607e-05	4.80067e-05	APC/BRCA2/CENPA/ECT2/INCENP/MYH10/PLK1/SEPTIN4/RASA1/ROCK1/SON/USP8/AURKB/ROCK2/KIF23/KIF20B/ESPL1/ACTR3/ACTR2/KIF20A/KIF4A/CKAP2/RACGAP1/NUSAP1/CEP55/MAP9	26
BP	GO:0051054	positive regulation of DNA metabolic process	45/1752	228/18670	1.20807e-06	5.98509e-05	4.94869e-05	ATR/ATRX/BRCA1/CCT6A/CDK1/CDK2/DHX9/DNMT1/EGFR/FOXM1/MSH2/NEK2/PCNA/PKIB/PRKDC/RAD51/RFC3/TFRC/TP53BP1/NSD2/WRN/XRCC5/USP9X/CDC7/TNKS/TIMELESS/AURKB/ACTR2/RAD50/DBF4/PAXIP1/SMCHD1/PARM1/POT1/OTUD4/RIF1/RESF1/ATF7IP/TIGAR/DSCC1/E2F8/PARP9/E2F7/DTX3L/DHX36	45
BP	GO:0048511	rhythmic process	54/1752	295/18670	1.30603e-06	6.41602e-05	5.305e-05	ARNTL/CASP2/CASP3/CDK1/CDK4/CREB1/CRY1/DHX9/EGFR/EP300/ETS1/EZH2/MTOR/GFPT1/GSK3B/KCNA2/NGFR/OXTR/SERPINE1/PCNA/PRKAA1/PRKDC/PROX1/PTGDS/PTN/PTX3/KDM5A/ROBO2/RORB/SRD5A1/TGFB2/KLF10/TOP1/TOP2A/TP53/TYMS/UBE3A/NRIP1/USP9X/TIMELESS/ROCK2/CLOCK/NCOR1/NAMPT/NCOA2/RAI1/KDM5B/GPR176/NLGN1/ADNP/OPN3/DTL/ARNTL2/SPSB4	54
BP	GO:0032465	regulation of cytokinesis	24/1752	89/18670	1.46266e-06	7.12559e-05	5.8917e-05	BRCA2/CDC6/ECT2/INCENP/PLK1/PKN2/AURKA/CUL3/PRC1/AURKB/KIF23/KIF20B/KIF14/KIF20A/PLK2/RACGAP1/SH3GLB1/MAP10/PRPF40A/BIRC6/E2F8/MAP9/KLHL13/E2F7	24
BP	GO:0035987	endodermal cell differentiation	16/1752	45/18670	1.55847e-06	7.52961e-05	6.22575e-05	COL4A2/COL5A1/COL5A2/COL8A1/COL12A1/FN1/ITGA4/ITGA5/ITGA7/ITGAV/LAMB1/MMP2/MMP9/MMP14/RTF1/CDC73	16
BP	GO:0051302	regulation of cell division	36/1752	168/18670	1.90751e-06	9.08498e-05	7.51179e-05	BRCA2/CDC6/ECT2/INCENP/PLK1/PKN2/PTN/RBL1/RBL2/SFRP2/AURKA/TGFB2/VEGFA/NCOA3/CUL3/PRC1/AURKB/KIF23/KIF20B/KIF14/KIF20A/PLK2/ORC6/RACGAP1/SH3GLB1/MAP10/PRPF40A/BIRC6/E2F8/MAP9/PDGFD/LBH/KLHL13/E2F7/KIF18B/ASPM	36
BP	GO:0034508	centromere complex assembly	18/1752	56/18670	1.91148e-06	9.08498e-05	7.51179e-05	CENPA/CENPE/CENPF/CENPI/HELLS/RB1/OIP5/RSF1/MIS18BP1/HJURP/CENPN/KNL1/CENPK/CENPH/CENPO/CENPU/CENPL/CENPW	18
BP	GO:0051298	centrosome duplication	20/1752	67/18670	1.93642e-06	9.1293e-05	7.54843e-05	BRCA1/BRCA2/CCNF/CDK2/PKD2/STIL/XPO1/ALMS1/ROCK2/CEP135/CKAP5/PLK4/PLK2/CEP152/USP33/POC1A/CEP192/CEP295/WDR62/GEN1	20
BP	GO:0018105	peptidyl-serine phosphorylation	54/1752	299/18670	2.00016e-06	9.35436e-05	7.73452e-05	ATP2B4/ATR/BRAF/CAMK2D/CAV1/CCNB1/CDK1/CDK2/CSNK1A1/CSNK1G3/EGFR/MTOR/GSK3B/LIF/MARK1/PDE4D/PDK3/PIK3CA/PLK1/PRKAA1/PRKCI/PKN2/PRKDC/ROCK1/RPS6KA3/RPS6KB1/SFRP2/AURKA/TAF1/TGFBR1/TOP1/TTK/VEGFA/CDC7/TNKS/LATS1/AURKB/EIF2AK3/ROCK2/TLK1/AKAP9/TENM1/SPRY2/PLK2/NEK6/LMTK2/SMG1/CSNK1G1/CLSPN/NSD1/MASTL/DOCK7/LRRK2/UHMK1	54
BP	GO:0071478	cellular response to radiation	39/1752	191/18670	2.56643e-06	0.000119074	9.84548e-05	ATR/CDC25A/CHEK1/CRY1/ECT2/EIF2S1/ELK1/EP300/ERCC4/PCNA/POLH/PTN/RAD1/RAD51/RBL2/SFRP2/SNAI2/TAF1/TP53/TP53BP1/WRN/XRCC5/CUL4B/AURKB/CLOCK/NAMPT/RAD51AP1/POLD3/OPN3/NIPBL/INTS7/POLK/MAP3K20/PBK/FIGNL1/RHNO1/SDE2/DHX36/EIF2AK4	39
BP	GO:0031571	mitotic G1 DNA damage checkpoint	19/1752	63/18670	2.93367e-06	0.000133986	0.000110785	CCND1/CASP2/CCNB1/CDK1/CDC25C/CDK2/E2F1/EP300/PCNA/PRKDC/RBL2/AURKA/TP53/PLK2/CNOT1/GTSE1/RFWD3/E2F8/E2F7	19
BP	GO:0044819	mitotic G1/S transition checkpoint	19/1752	63/18670	2.93367e-06	0.000133986	0.000110785	CCND1/CASP2/CCNB1/CDK1/CDC25C/CDK2/E2F1/EP300/PCNA/PRKDC/RBL2/AURKA/TP53/PLK2/CNOT1/GTSE1/RFWD3/E2F8/E2F7	19
BP	GO:0007623	circadian rhythm	41/1752	208/18670	3.65947e-06	0.000165839	0.000137122	ARNTL/CDK1/CDK4/CREB1/CRY1/EGFR/EP300/EZH2/MTOR/GFPT1/GSK3B/KCNA2/NGFR/SERPINE1/PRKAA1/PRKDC/PROX1/PTGDS/KDM5A/RORB/SRD5A1/KLF10/TOP1/TOP2A/TP53/TYMS/UBE3A/NRIP1/USP9X/TIMELESS/ROCK2/CLOCK/NCOR1/NAMPT/NCOA2/RAI1/GPR176/NLGN1/OPN3/ARNTL2/SPSB4	41
BP	GO:0036297	interstrand cross-link repair	17/1752	53/18670	3.79464e-06	0.000169936	0.000140509	ATR/ERCC4/FANCA/FANCC/FANCD2/MSH6/RAD51/USP1/DCLRE1A/RAD51AP1/UBE2T/RFWD3/FANCI/DCLRE1B/MCM8/EME1/ERCC6L2	17
BP	GO:0044783	G1 DNA damage checkpoint	19/1752	64/18670	3.80801e-06	0.000169936	0.000140509	CCND1/CASP2/CCNB1/CDK1/CDC25C/CDK2/E2F1/EP300/PCNA/PRKDC/RBL2/AURKA/TP53/PLK2/CNOT1/GTSE1/RFWD3/E2F8/E2F7	19
BP	GO:0006271	DNA strand elongation involved in DNA replication	10/1752	20/18670	3.94973e-06	0.000174925	0.000144635	FEN1/MCM4/PCNA/POLA1/RFC3/GINS1/POLD3/GINS2/GINS4/RNASEH1	10
BP	GO:0050000	chromosome localization	21/1752	76/18670	4.28208e-06	0.000188218	0.000155626	CCNB1/CENPE/CENPF/KIFC1/NUP98/CUL3/CDC23/ZW10/DLGAP5/KIF14/ACTR3/ACTR2/NDC80/SPAG5/KIF2C/CDCA8/FAM83D/KIF18A/NUF2/CDCA5/CHAMP1	21
BP	GO:0072413	signal transduction involved in mitotic cell cycle checkpoint	18/1752	59/18670	4.43429e-06	0.000190609	0.000157603	CASP2/CCNB1/CDK1/CDC25C/CDK2/E2F1/EP300/PCNA/PRKDC/RBL2/AURKA/TP53/PLK2/CNOT1/GTSE1/RINT1/E2F8/E2F7	18
BP	GO:1902402	signal transduction involved in mitotic DNA damage checkpoint	18/1752	59/18670	4.43429e-06	0.000190609	0.000157603	CASP2/CCNB1/CDK1/CDC25C/CDK2/E2F1/EP300/PCNA/PRKDC/RBL2/AURKA/TP53/PLK2/CNOT1/GTSE1/RINT1/E2F8/E2F7	18
BP	GO:1902403	signal transduction involved in mitotic DNA integrity checkpoint	18/1752	59/18670	4.43429e-06	0.000190609	0.000157603	CASP2/CCNB1/CDK1/CDC25C/CDK2/E2F1/EP300/PCNA/PRKDC/RBL2/AURKA/TP53/PLK2/CNOT1/GTSE1/RINT1/E2F8/E2F7	18
BP	GO:0006323	DNA packaging	41/1752	210/18670	4.69368e-06	0.000200287	0.000165604	ATRX/CCNB1/CDK1/CENPA/CENPI/HELLS/MCM2/TOP2A/TP53/TPR/KAT6A/CHAF1B/NCAPD2/CHAF1A/SMC4/SMC2/OIP5/PSME4/NCAPD3/SMCHD1/NCAPH/NIPBL/NUSAP1/RSF1/NCAPG2/MIS18BP1/HJURP/ASF1B/CENPN/ASH1L/KNL1/CENPK/NCAPG/CENPH/CENPO/CENPU/CENPL/CDCA5/SPTY2D1/SHPRH/CENPW	41
BP	GO:0007160	cell-matrix adhesion	43/1752	225/18670	4.93447e-06	0.000209035	0.000172838	ACTN1/JAG1/CDK6/COL3A1/DAG1/EPHA3/FN1/GSK3B/HOXA7/ITGA1/ITGA3/ITGA4/ITGA7/ITGAV/ITGB1/KDR/MKLN1/MMP14/NID1/SERPINE1/PLAU/RASA1/ROCK1/THBS1/VCL/VEGFA/PIP5K1A/CASK/ADAM9/IQGAP1/NRP1/ROCK2/POSTN/FERMT2/FAM107A/NID2/TRPM7/EPB41L5/PLEKHA2/PEAK1/NPNT/ACER2/NEXMIF	43
BP	GO:0060560	developmental growth involved in morphogenesis	44/1752	235/18670	6.68181e-06	0.000277183	0.000229185	APOE/BMPR2/CDH4/DCC/FN1/GSK3B/HOXD13/TNC/ITGA4/ITGB1/LRP6/MAG/MAP1B/NRCAM/PLXNA1/MED1/PTK7/SFRP2/AURKA/VCL/VEGFA/USP9X/IQGAP1/NRP2/NRP1/SEMA5A/SPRY1/SPRY2/POSTN/KDM5B/ADNP/FLRT3/NIN/TNFRSF12A/KIF26B/EPB41L5/RAPH1/SEMA6D/SPG11/PLXNA4/WDR36/RDH10/DRAXIN/EIF2AK4	44
BP	GO:0034724	DNA replication-independent nucleosome organization	17/1752	55/18670	6.68353e-06	0.000277183	0.000229185	ATRX/CENPA/CENPI/SUPT16H/OIP5/RSF1/MIS18BP1/HJURP/ASF1B/CENPN/KNL1/CENPK/CENPH/CENPO/CENPU/CENPL/CENPW	17
BP	GO:0007076	mitotic chromosome condensation	9/1752	17/18670	6.68539e-06	0.000277183	0.000229185	NCAPD2/SMC4/SMC2/NCAPD3/NCAPH/NIPBL/NUSAP1/NCAPG/CDCA5	9
BP	GO:0071459	protein localization to chromosome, centromeric region	10/1752	21/18670	6.9054e-06	0.000284288	0.00023506	CDK1/CENPA/RB1/TTK/ZW10/AURKB/NDC80/KNL1/HASPIN/CHAMP1	10
BP	GO:0044773	mitotic DNA damage checkpoint	24/1752	97/18670	7.52375e-06	0.000304063	0.00025141	CCND1/CASP2/CCNB1/CDK1/CDC25C/CDK2/E2F1/EP300/MSH2/PCNA/PRKDC/RBL2/AURKA/TP53/PLK2/CNOT1/GTSE1/RFWD3/TAOK1/RINT1/CLSPN/E2F8/E2F7/EME1	24
BP	GO:0001706	endoderm formation	16/1752	50/18670	7.54176e-06	0.000304063	0.00025141	COL4A2/COL5A1/COL5A2/COL8A1/COL12A1/FN1/ITGA4/ITGA5/ITGA7/ITGAV/LAMB1/MMP2/MMP9/MMP14/RTF1/CDC73	16
BP	GO:0072698	protein localization to microtubule cytoskeleton	16/1752	50/18670	7.54176e-06	0.000304063	0.00025141	APC/BICD1/DIAPH1/GSK3B/MID1/STIL/AURKA/TTK/KIF20B/SPAG5/MID2/CEP192/FAM83D/NEDD1/UBXN2B/CHAMP1	16
BP	GO:0070316	regulation of G0 to G1 transition	15/1752	45/18670	8.24829e-06	0.000330085	0.000272926	APAF1/BRCA1/CHEK1/E2F1/EZH2/MED1/RAD51/RBBP8/RNF2/RRM2/CDC7/CBX5/SUZ12/PHC3/RHNO1	15
BP	GO:0034330	cell junction organization	51/1752	290/18670	8.30013e-06	0.000330085	0.000272926	ACTN1/APC/CAV1/CDH2/CDH4/CDH6/CDH11/CTNND1/ACE/ECT2/EPHA2/EPHA3/F2R/FLNA/FN1/GJB1/GJB2/ITGA5/KDR/LAMC1/AFDN/MMP14/PRKCI/PKN2/PTPRO/PVR/ROCK1/SNAI2/TGFB2/TGFBR1/THBS1/VCL/VEGFA/PIP5K1A/IQGAP1/NRP1/DLG5/ROCK2/GJC1/FERMT2/FAM107A/RASSF8/CADM1/NECTIN3/RAB8B/FBLIM1/HEG1/NLGN4X/EPB41L5/PEAK1/MTDH	51
BP	GO:0016569	covalent chromatin modification	74/1752	474/18670	8.49704e-06	0.000335633	0.000277513	ATRX/BRCA1/BRCA2/CAMK2D/CCNA2/CCNB1/CDK1/CDK2/CHD1/CHEK1/DNMT1/EP300/EZH2/HELLS/HLCS/LIF/PRKAA1/KDM5A/RBBP5/RLF/RNF2/SNAI2/AURKA/TAF1/TP53/KDM6A/VEGFA/NSD2/KAT6A/KMT2D/NCOA3/TRRAP/CUL4B/BAZ1B/AURKB/TRIP12/GTF3C4/CLOCK/KDM4A/DCAF1/HDAC9/RNF40/KDM5B/BAZ1A/PAXIP1/RTF1/RCOR1/SUZ12/NIPBL/EPC2/BRPF3/UHRF1/UBR5/RSF1/ING3/BCOR/PRMT6/RIF1/RESF1/ATF7IP/ASH1L/KMT2E/SMARCAD1/SMYD2/EP400/KMT2C/NSD1/CDC73/NAA5…	74
BP	GO:0010810	regulation of cell-substrate adhesion	41/1752	215/18670	8.57387e-06	0.000336395	0.000278144	JAG1/ANGPT2/CDK6/COL1A1/COL8A1/DAG1/EPHA3/FLNA/FN1/GBP1/GCNT2/GSK3B/HOXA7/ITGA3/ITGA5/KDR/MMP14/NEDD9/NID1/SERPINE1/PLAU/PTN/PTPRO/RASA1/ROCK1/THBS1/VEGFA/CASK/IQGAP1/NRP1/ROCK2/PDPN/POSTN/FAM107A/EPB41L5/PLEKHA2/PEAK1/EMILIN3/NPNT/ACER2/NEXMIF	41
BP	GO:1901796	regulation of signal transduction by p53 class mediator	36/1752	180/18670	9.99986e-06	0.000389324	0.000321907	ATR/BARD1/BRCA1/CDK2/CHEK1/EP300/PRKAA1/RAD1/RBBP8/RFC3/SNAI2/AURKA/TAF1/TAF2/TOP3A/TP53/WRN/KAT6A/TRIM24/EXO1/AURKB/RAD50/TOPBP1/SUPT16H/TPX2/RRM2B/PRMT6/SMYD2/MARCHF7/RMI1/RHNO1/BRIP1/RMI2/SPRED1/SPRED2/SPRED3	36
BP	GO:0071214	cellular response to abiotic stimulus	56/1752	331/18670	1.01227e-05	0.000389324	0.000321907	ATP1A1/ATR/CASP2/CASP3/CDC25A/CHEK1/COL1A1/CRY1/DAG1/DDX3X/ECT2/EGFR/EIF2S1/ELK1/EP300/ERCC4/MAG/MAP3K1/MYD88/PCNA/PKD2/POLH/PTN/RAD1/RAD51/RBL2/SCN2A/SFRP2/SNAI2/TAF1/TP53/TP53BP1/WRN/XRCC5/CUL4B/AURKB/CLOCK/SLC12A6/CASP8AP2/NAMPT/RAD51AP1/POLD3/OPN3/NIPBL/INTS7/POLK/MAP3K20/SLC38A2/PBK/FIGNL1/EFHD1/RHNO1/MTPN/SDE2/DHX36/EIF2AK4	56
BP	GO:0104004	cellular response to environmental stimulus	56/1752	331/18670	1.01227e-05	0.000389324	0.000321907	ATP1A1/ATR/CASP2/CASP3/CDC25A/CHEK1/COL1A1/CRY1/DAG1/DDX3X/ECT2/EGFR/EIF2S1/ELK1/EP300/ERCC4/MAG/MAP3K1/MYD88/PCNA/PKD2/POLH/PTN/RAD1/RAD51/RBL2/SCN2A/SFRP2/SNAI2/TAF1/TP53/TP53BP1/WRN/XRCC5/CUL4B/AURKB/CLOCK/SLC12A6/CASP8AP2/NAMPT/RAD51AP1/POLD3/OPN3/NIPBL/INTS7/POLK/MAP3K20/SLC38A2/PBK/FIGNL1/EFHD1/RHNO1/MTPN/SDE2/DHX36/EIF2AK4	56
BP	GO:0003279	cardiac septum development	26/1752	112/18670	1.10796e-05	0.000423343	0.000350036	JAG1/BMPR2/LTBP1/MYH10/NOTCH2/PROX1/PTK7/RARB/ROBO1/ROBO2/SOX11/TBX5/TGFB2/TGFBR1/TP53/NSD2/LUZP1/FZD1/NRP2/NRP1/TRIP11/ADAMTS6/HECTD1/PARVA/HEG1/CPLANE1	26
BP	GO:0051310	metaphase plate congression	17/1752	57/18670	1.14044e-05	0.000423854	0.000350458	CCNB1/CENPE/CENPF/KIFC1/CUL3/CDC23/ZW10/KIF14/NDC80/SPAG5/KIF2C/CDCA8/FAM83D/KIF18A/NUF2/CDCA5/CHAMP1	17
BP	GO:0072431	signal transduction involved in mitotic G1 DNA damage checkpoint	17/1752	57/18670	1.14044e-05	0.000423854	0.000350458	CASP2/CCNB1/CDK1/CDC25C/CDK2/E2F1/EP300/PCNA/PRKDC/RBL2/AURKA/TP53/PLK2/CNOT1/GTSE1/E2F8/E2F7	17
BP	GO:1902400	intracellular signal transduction involved in G1 DNA damage checkpoint	17/1752	57/18670	1.14044e-05	0.000423854	0.000350458	CASP2/CCNB1/CDK1/CDC25C/CDK2/E2F1/EP300/PCNA/PRKDC/RBL2/AURKA/TP53/PLK2/CNOT1/GTSE1/E2F8/E2F7	17
BP	GO:0071559	response to transforming growth factor beta	46/1752	255/18670	1.15176e-05	0.000423854	0.000350458	APAF1/BMPR2/CAV1/CBL/CDKN1C/COL1A1/COL1A2/COL3A1/COL4A2/CREB1/EP300/FMOD/GCNT2/GDF10/ITGA3/LOX/LTBP1/SMAD1/SMAD5/ROCK1/SOX5/SOX11/ADAM17/TGFB2/TGFBR1/THBS1/TP53/USP9X/ADAM9/NREP/TGFBRAP1/ROCK2/GDF15/POSTN/FERMT2/PEG10/LEMD3/MXRA5/CHST11/TRIM33/RNF111/TWSG1/EPB41L5/PDGFD/NPNT/BCL9L	46
BP	GO:0001649	osteoblast differentiation	42/1752	225/18670	1.15798e-05	0.000423854	0.000350458	ADAR/JAG1/BMPR2/CDK6/CLTC/COL1A1/DHX9/EPHA2/GDF10/TNC/IARS1/IGFBP3/IGFBP5/LOX/LTF/SMAD1/SMAD5/RORB/CCL3/SFRP2/SHOX2/SNAI2/SOX11/TPM4/FZD1/CCN4/LIMD1/DDX21/SYNCRIP/SNRNP200/SATB2/DNAJC13/FBXO5/SUCO/BCAP29/CCDC47/TWSG1/FIGNL1/CREB3L1/CTHRC1/NPNT/SH3PXD2B	42
BP	GO:0010165	response to X-ray	12/1752	31/18670	1.16005e-05	0.000423854	0.000350458	ANXA1/CCND1/BRCA2/CASP3/MSH2/SFRP2/TP53/TP53BP1/XRCC2/XRCC5/NIPBL/IKBIP	12
BP	GO:0045737	positive regulation of cyclin-dependent protein serine/threonine kinase activity	12/1752	31/18670	1.16005e-05	0.000423854	0.000350458	CCND1/CCNB1/CCND2/CCNT1/CDC6/CKS1B/CKS2/EGFR/PKD2/PROX1/ADAM17/CCNYL1	12
BP	GO:0043087	regulation of GTPase activity	74/1752	479/18670	1.23421e-05	0.00044815	0.000370547	ARHGDIG/CHM/CHML/ECT2/EPHA2/EPHA3/EPHA4/EZH2/F2R/MTOR/GSK3B/ITGB1/AFDN/NEDD9/OCRL/PLXNA1/PLXNA2/RANBP2/RASA1/RGS16/RP2/CCL3/SOS1/PIP5K1A/RGS11/IQGAP1/NRP1/ASAP2/ARHGAP29/RASAL2/STXBP5L/DOCK4/GIT2/ARHGAP11A/RGP1/RASGRP1/PLXNC1/SPRY1/SPRY2/VAV3/SEC23A/ARFGEF1/IQGAP2/ADAP1/RRP1B/SIPA1L3/SNX13/ARHGEF12/ACAP2/RAB3GAP2/SIPA1L1/RGS17/RACGAP1/ASAP1/FAM13B/TBC1D19/DEPDC1/DEPDC1B/RALGAPB/RALGAPA2/TBC1D14/S…	74
BP	GO:0018107	peptidyl-threonine phosphorylation	28/1752	126/18670	1.24903e-05	0.000450732	0.000372681	CAMK2D/CDK1/CHEK1/CHI3L1/CSNK1A1/CSNK1G3/MTOR/GSK3B/PLK1/ROCK1/TAF1/TGFBR1/TTK/CDC7/CDC42BPA/TNKS/ROCK2/DCAF1/SPRY2/LMTK2/CSNK1G1/CEMIP/WNK3/HASPIN/LRRK2/SPRED1/SPRED2/SPRED3	28
BP	GO:0051303	establishment of chromosome localization	20/1752	75/18670	1.29039e-05	0.000460506	0.000380763	CCNB1/CENPE/CENPF/KIFC1/CUL3/CDC23/ZW10/DLGAP5/KIF14/ACTR3/ACTR2/NDC80/SPAG5/KIF2C/CDCA8/FAM83D/KIF18A/NUF2/CDCA5/CHAMP1	20
BP	GO:0006338	chromatin remodeling	36/1752	182/18670	1.29188e-05	0.000460506	0.000380763	ATRX/CENPA/CHD1/CHEK1/BPTF/CENPI/HELLS/HMGB3/RB1/KDM5A/SMARCC1/TOP1/TPR/KDM6A/BAZ1B/KDM4A/KDM5B/BAZ1A/OIP5/PSME4/SATB2/SMCHD1/RSF1/PBRM1/MIS18BP1/HJURP/CENPN/SMARCAD1/KNL1/CENPK/CENPH/CENPO/CENPU/CENPL/SPTY2D1/CENPW	36
BP	GO:0046605	regulation of centrosome cycle	17/1752	58/18670	1.47334e-05	0.00052201	0.000431617	BRCA1/CCNF/CHEK1/KIF11/NEK2/STIL/AURKA/XPO1/ALMS1/ROCK2/PLK4/PLK2/POC1A/MAP9/CEP295/UBXN2B/GEN1	17
BP	GO:0000727	double-strand break repair via break-induced replication	7/1752	11/18670	1.48787e-05	0.00052398	0.000433246	MCM2/MCM4/MCM6/CDC7/CDC45/GINS2/GINS4	7
BP	GO:0045023	G0 to G1 transition	15/1752	47/18670	1.50091e-05	0.000525043	0.000434125	APAF1/BRCA1/CHEK1/E2F1/EZH2/MED1/RAD51/RBBP8/RNF2/RRM2/CDC7/CBX5/SUZ12/PHC3/RHNO1	15
BP	GO:0018210	peptidyl-threonine modification	29/1752	134/18670	1.50885e-05	0.000525043	0.000434125	CAMK2D/CDK1/CHEK1/CHI3L1/CSNK1A1/CSNK1G3/MTOR/GALNT2/GSK3B/PLK1/ROCK1/TAF1/TGFBR1/TTK/CDC7/CDC42BPA/TNKS/ROCK2/DCAF1/SPRY2/LMTK2/CSNK1G1/CEMIP/WNK3/HASPIN/LRRK2/SPRED1/SPRED2/SPRED3	29
BP	GO:0034644	cellular response to UV	21/1752	82/18670	1.55842e-05	0.000539085	0.000445735	ATR/CDC25A/CHEK1/EIF2S1/EP300/ERCC4/PCNA/POLH/PTN/RBL2/TAF1/TP53/CUL4B/AURKB/POLD3/POLK/PBK/RHNO1/SDE2/DHX36/EIF2AK4	21
BP	GO:0010975	regulation of neuron projection development	76/1752	499/18670	1.57564e-05	0.000541835	0.000448008	ALK/APOE/ARSB/BMPR2/CDC20/CDH2/CDH4/CNR1/DCC/EFNB2/EP300/EPHA3/EPHA4/EZH2/FN1/MTOR/GSK3B/ITGA3/CAPRIN1/MAG/MAP1B/MARK1/NGFR/NRCAM/OPA1/PLXNA1/PLXNA2/POU3F2/PRKCI/MAPK6/KLK6/PTK7/TWF1/PTN/PTPN9/PTPRG/PTPRO/ROBO1/ROBO2/SFRP2/SHOX2/CNTN2/NR2E1/UBE3A/VEGFA/LRP8/FZD1/IQGAP1/NRP1/SEMA5A/DLG5/BAG5/ACTR2/PLXNC1/PLK2/LZTS1/NLGN1/ARC/CAMSAP2/ADNP/SIPA1L1/FBXW8/ASAP1/NIN/TNFRSF12A/TMEM106B/CCDC88A/KIDINS220…	76
BP	GO:0007492	endoderm development	20/1752	76/18670	1.59832e-05	0.000546419	0.000451799	COL4A2/COL5A1/COL5A2/COL8A1/COL12A1/BPTF/FN1/ITGA4/ITGA5/ITGA7/ITGAV/LAMB1/LAMC1/MMP2/MMP9/MMP14/RTF1/ARC/EPB41L5/CDC73	20
BP	GO:0001704	formation of primary germ layer	27/1752	121/18670	1.63786e-05	0.000556683	0.000460286	BMPR2/COL4A2/COL5A1/COL5A2/COL8A1/COL12A1/EPHA2/EXT2/FN1/ITGA3/ITGA4/ITGA5/ITGA7/ITGAV/ITGB1/LAMB1/SMAD1/MMP2/MMP9/MMP14/SFRP2/TXNRD1/KDM6A/RTF1/TWSG1/EPB41L5/CDC73	27
BP	GO:0050773	regulation of dendrite development	31/1752	149/18670	1.79198e-05	0.000605545	0.000500686	ALK/APOE/CDC20/DCC/EPHA4/EZH2/MTOR/GSK3B/CAPRIN1/MARK1/OPA1/MAPK6/PTN/NR2E1/UBE3A/LRP8/IQGAP1/DLG5/ACTR2/PLK2/LZTS1/NLGN1/ARC/CAMSAP2/SIPA1L1/FBXW8/ASAP1/TMEM106B/LRRK2/SEZ6/DHX36	31
BP	GO:0001655	urogenital system development	55/1752	330/18670	1.88166e-05	0.000631583	0.000522216	JAG1/ANGPT2/ANXA1/APAF1/CDKN1C/CENPF/COL4A1/ACE/EFNB2/ENPEP/EPHA4/HOXD13/TNC/ITGA3/LIF/SMAD1/SMAD5/MMP9/NID1/PKD2/PODXL/PPAT/PROX1/PTPRO/RARB/ROBO2/SDC1/SMARCC1/SOX11/SRD5A1/STAT1/TGFB2/TGFBR1/UBE3A/VEGFA/DCHS1/IQGAP1/NRP1/DLG5/CRLF1/CYP7B1/SPRY1/NUP160/NIPBL/SEC61A1/RRM2B/PLCE1/KIF26B/CEP55/CPLANE1/PDGFD/LRRK2/RDH10/BMPER/NPNT	55
BP	GO:0051056	regulation of small GTPase mediated signal transduction	56/1752	338/18670	1.89064e-05	0.000631583	0.000522216	APOE/ARHGDIG/CBL/COL3A1/ECT2/EPS8/F2R/F2RL2/FOXM1/ITGA3/ITGB1/KRAS/MET/KITLG/NOTCH2/OCRL/RASA1/ROBO1/SHC1/SOS1/TGFB2/TRIO/CUL3/NRP1/ARHGAP29/ARHGAP11A/KIF14/RASGRP1/SPRY1/SPRY2/VAV3/ARFGEF2/ARFGEF1/SIPA1L3/PSD3/ARHGEF12/SIPA1L1/RACGAP1/ARHGEF3/PLCE1/FAM13B/DEPDC1B/RALGAPB/RALGAPA2/RHOJ/HEG1/SIPA1L2/ARHGAP20/ALS2/ARAP3/PLEKHG2/SPRY4/ARHGAP18/SSX2IP/ARHGAP42/TRIM67	56
BP	GO:0006282	regulation of DNA repair	27/1752	122/18670	1.9179e-05	0.000637048	0.000526735	BRCA1/CHEK1/DHX9/EGFR/FOXM1/PCNA/POLH/PRKDC/RAD51/TP53BP1/USP1/NSD2/DEK/TIMELESS/TRIP12/ACTR2/RAD51AP1/SMCHD1/UBR5/PARPBP/RIF1/TIGAR/FIGNL1/PARP9/RMI2/DTX3L/RNF169	27
BP	GO:2000779	regulation of double-strand break repair	20/1752	77/18670	1.97064e-05	0.000649074	0.000536678	CHEK1/FOXM1/PRKDC/RAD51/TP53BP1/NSD2/DEK/TIMELESS/TRIP12/ACTR2/RAD51AP1/SMCHD1/UBR5/PARPBP/RIF1/FIGNL1/PARP9/RMI2/DTX3L/RNF169	20
BP	GO:0031055	chromatin remodeling at centromere	15/1752	48/18670	1.99497e-05	0.000649074	0.000536678	CENPA/CENPI/HELLS/OIP5/RSF1/MIS18BP1/HJURP/CENPN/KNL1/CENPK/CENPH/CENPO/CENPU/CENPL/CENPW	15
BP	GO:0051653	spindle localization	15/1752	48/18670	1.99497e-05	0.000649074	0.000536678	CENPA/MAD2L1/PLK1/WASL/ZW10/ESPL1/ACTR3/ACTR2/SPRY1/SPRY2/NDC80/GPSM2/NUSAP1/UBXN2B/ASPM	15
BP	GO:0071479	cellular response to ionizing radiation	19/1752	71/18670	1.99852e-05	0.000649074	0.000536678	ATR/ECT2/ELK1/RAD1/RAD51/SFRP2/SNAI2/TP53/TP53BP1/WRN/XRCC5/CLOCK/NAMPT/RAD51AP1/NIPBL/INTS7/MAP3K20/FIGNL1/RHNO1	19
BP	GO:1902969	mitotic DNA replication	8/1752	15/18670	2.08279e-05	0.000672706	0.000556218	BRCA2/MCM2/MCM4/MCM6/POLA1/RAD51/CDC45/GINS1	8
BP	GO:0045132	meiotic chromosome segregation	22/1752	90/18670	2.18445e-05	0.000701664	0.000580161	BUB1/BUB1B/ERCC4/FANCD2/PLK1/TOP2A/TTK/PTTG1/TRIP13/ESPL1/SMC4/ACTR3/ACTR2/SMC2/NCAPH/NDC1/RMI1/NUF2/BRIP1/EME1/SGO2/SGO1	22
BP	GO:0016570	histone modification	70/1752	454/18670	2.24512e-05	0.000711861	0.000588593	ATRX/BRCA1/BRCA2/CAMK2D/CCNA2/CCNB1/CDK1/CDK2/CHEK1/DNMT1/EP300/EZH2/HLCS/LIF/PRKAA1/KDM5A/RBBP5/RLF/RNF2/SNAI2/AURKA/TAF1/TP53/KDM6A/VEGFA/NSD2/KAT6A/KMT2D/NCOA3/TRRAP/CUL4B/BAZ1B/AURKB/TRIP12/GTF3C4/CLOCK/KDM4A/DCAF1/HDAC9/RNF40/KDM5B/BAZ1A/PAXIP1/RTF1/RCOR1/SUZ12/NIPBL/EPC2/BRPF3/UHRF1/UBR5/RSF1/ING3/BCOR/PRMT6/RIF1/ASH1L/KMT2E/SMARCAD1/SMYD2/EP400/KMT2C/NSD1/CDC73/NAA50/HASPIN/LRRK2/DTX3L/TET…	70
BP	GO:0006336	DNA replication-independent nucleosome assembly	16/1752	54/18670	2.24998e-05	0.000711861	0.000588593	ATRX/CENPA/CENPI/OIP5/RSF1/MIS18BP1/HJURP/ASF1B/CENPN/KNL1/CENPK/CENPH/CENPO/CENPU/CENPL/CENPW	16
BP	GO:0030324	lung development	34/1752	172/18670	2.25273e-05	0.000711861	0.000588593	ATP7A/BMPR2/CHI3L1/CREB1/DAG1/EGFR/EP300/HOXA5/TNC/IGFBP5/ITGA3/KRAS/LIF/LOX/MMP14/PROX1/PTK7/PTN/SIM2/SOX11/SP3/TBX5/VEGFA/TIMELESS/DLG5/PHF14/SPRY1/SPRY2/SEC24B/PDPN/MAN1A2/HEG1/RDH10/ATXN1L	34
BP	GO:0051984	positive regulation of chromosome segregation	11/1752	28/18670	2.28704e-05	0.000718819	0.000594346	CCNB1/CDC6/FEN1/RB1/CUL3/ESPL1/DLGAP5/SMC5/NIPBL/RAD18/SMC6	11
BP	GO:0030900	forebrain development	61/1752	381/18670	2.39234e-05	0.000747896	0.000618387	ALK/APAF1/ATP2B4/ATP7A/ATRX/CASP3/CDH2/CDK6/COL3A1/CREB1/E2F1/EGFR/ETS1/EZH2/FABP7/FLNA/GART/GSK3B/HIF1A/KRAS/LAMB1/LRP6/MYH10/NPY/OXTR/POU3F2/PROX1/PTN/RARB/ROBO1/ROBO2/RRM1/STIL/SRD5A1/CNTN2/NR2F2/NR2E1/LRP8/NRP2/NRP1/SEMA5A/KIF14/TACC3/XRN2/PHLPP2/SYNE2/SATB2/NIN/SLC38A2/GNG12/TWSG1/SLC4A10/TTC21B/PGAP1/DOCK7/PLXNA4/LRRK2/ARL13B/ASPM/WDR62/DRAXIN	61
BP	GO:2001252	positive regulation of chromosome organization	34/1752	174/18670	2.89422e-05	0.000896651	0.000741383	ATR/ATRX/BRCA1/CCNB1/CCT6A/DNMT1/FEN1/LIF/NEK2/PKIB/RB1/SNAI2/TP53/TPR/VEGFA/XRCC5/CUL3/TNKS/AURKB/ESPL1/DLGAP5/RNF40/RAD50/PAXIP1/SMC5/RTF1/NIPBL/POT1/RIF1/RESF1/ATF7IP/KMT2E/LRRK2/DHX36	34
BP	GO:0044380	protein localization to cytoskeleton	16/1752	55/18670	2.89885e-05	0.000896651	0.000741383	APC/BICD1/DIAPH1/GSK3B/MID1/STIL/AURKA/TTK/KIF20B/SPAG5/MID2/CEP192/FAM83D/NEDD1/UBXN2B/CHAMP1	16
BP	GO:0007080	mitotic metaphase plate congression	14/1752	44/18670	2.99164e-05	0.000910892	0.000753159	CCNB1/CENPE/KIFC1/CUL3/CDC23/ZW10/KIF14/NDC80/KIF2C/CDCA8/KIF18A/NUF2/CDCA5/CHAMP1	14
BP	GO:0034080	CENP-A containing nucleosome assembly	14/1752	44/18670	2.99164e-05	0.000910892	0.000753159	CENPA/CENPI/OIP5/RSF1/MIS18BP1/HJURP/CENPN/KNL1/CENPK/CENPH/CENPO/CENPU/CENPL/CENPW	14
BP	GO:0061641	CENP-A containing chromatin organization	14/1752	44/18670	2.99164e-05	0.000910892	0.000753159	CENPA/CENPI/OIP5/RSF1/MIS18BP1/HJURP/CENPN/KNL1/CENPK/CENPH/CENPO/CENPU/CENPL/CENPW	14
BP	GO:0048193	Golgi vesicle transport	59/1752	368/18670	3.10156e-05	0.000939244	0.000776601	AP1G1/ARCN1/CAPZA2/CENPE/COPA/COPB1/GAS1/KIF2A/KIF11/LMAN1/MYO1B/MYO5A/PRKCI/PROS1/RP2/TRAPPC10/CUL3/USO1/ZW10/COPB2/KIF23/SCAMP1/SEC24C/SEC24D/DOP1B/SEC24B/LYPLA1/COG5/SEC23A/HYOU1/ARFGEF2/SEC24A/KIF2C/KDELR2/KDELR3/RAB31/SEC31A/VPS13A/KIF4A/KLHL20/RACGAP1/TMED5/RAB8B/CCDC93/VPS13C/STX17/BCAP29/KIF15/COG6/TBC1D14/KLHL12/RINT1/TRAPPC11/PGAP1/YIPF5/KIF18A/MCFD2/LRRK2/MIA3	59
BP	GO:0007584	response to nutrient	40/1752	219/18670	3.11689e-05	0.000939244	0.000776601	AGL/APAF1/ARSB/ATP2B1/CCND1/CNR1/COL1A1/CREB1/EGFR/MTOR/HLCS/HMGCR/HMGCS1/TNC/IGFBP2/CXCL10/MAP1B/OPA1/TNFRSF11B/P2RY1/PCNA/MED1/PTN/SFRP2/SNAI2/SST/STAT1/STC1/TAF1/TYMS/TRIM25/TNKS/TRIM24/POSTN/NNT/PANX1/SSH1/BRIP1/MIR125B1/CASTOR2	40
BP	GO:0048732	gland development	67/1752	434/18670	3.20718e-05	0.000961496	0.000795	AK4/ANXA1/ATP7A/CCND1/BRCA2/CAV1/CDKN1C/CREB1/DAG1/EGFR/EPHA2/ETS1/ETV5/EZH2/HIF1A/HMGCS1/HOXA5/HOXD9/HOXD13/IGSF3/TNC/IGF2R/IGFBP5/INSM1/KRAS/LRP6/MET/MSN/OAS2/OXTR/PCNA/PIK3CA/PKD2/PLXNA1/POU3F2/MED1/PPAT/PRKDC/PROX1/PTN/RARB/ROBO1/SNAI2/SMARCC1/SP3/SRD5A1/AURKA/TGFB2/TGFBR1/TYMS/UBE3A/VEGFA/CUL3/NRP1/LATS1/CCNB2/CYP7B1/KDM5B/ASH1L/TWSG1/WDR35/GNPNAT1/FA2H/E2F8/LBH/IQGAP3/E2F7	67
BP	GO:0051988	regulation of attachment of spindle microtubules to kinetochore	7/1752	12/18670	3.28037e-05	0.000978422	0.000808995	APC/CCNB1/ECT2/NEK2/SPAG5/RACGAP1/KNSTRN	7
BP	GO:0007568	aging	53/1752	321/18670	3.44274e-05	0.00101413	0.000838521	APAF1/ARNTL/ATP2B1/ATR/BRCA2/CANX/CASP2/CDK1/CDK6/CDKN1C/CHEK1/CNR1/COL4A2/CREB1/DAG1/DLD/EIF2S1/FOXM1/MTOR/GJB2/GRM5/MSH6/HMGCR/IGFBP2/IGFBP5/KRAS/LOXL2/MSH2/OPA1/P2RY1/SERPINE1/PDE4D/PRKDC/RBL1/RPN2/SOD2/STAT3/TIMP1/TP53/TYMS/WRN/KAT6A/RAD54L/AURKB/NAMPT/PLK2/NEK6/SMC5/FBXO5/PRMT6/SMC6/LRRK2/MIR590	53
BP	GO:0006409	tRNA export from nucleus	12/1752	34/18670	3.45214e-05	0.00101413	0.000838521	NUP98/RANBP2/TPR/NUP155/NUP58/POM121/NUP153/XPOT/NUP205/NUP160/NDC1/POM121C	12
BP	GO:0071431	tRNA-containing ribonucleoprotein complex export from nucleus	12/1752	34/18670	3.45214e-05	0.00101413	0.000838521	NUP98/RANBP2/TPR/NUP155/NUP58/POM121/NUP153/XPOT/NUP205/NUP160/NDC1/POM121C	12
BP	GO:0030323	respiratory tube development	34/1752	176/18670	3.69802e-05	0.00107841	0.000891671	ATP7A/BMPR2/CHI3L1/CREB1/DAG1/EGFR/EP300/HOXA5/TNC/IGFBP5/ITGA3/KRAS/LIF/LOX/MMP14/PROX1/PTK7/PTN/SIM2/SOX11/SP3/TBX5/VEGFA/TIMELESS/DLG5/PHF14/SPRY1/SPRY2/SEC24B/PDPN/MAN1A2/HEG1/RDH10/ATXN1L	34
BP	GO:0006977	DNA damage response, signal transduction by p53 class mediator resulting in cell cycle arrest	16/1752	56/18670	3.70785e-05	0.00107841	0.000891671	CASP2/CCNB1/CDK1/CDC25C/CDK2/E2F1/EP300/PCNA/RBL2/AURKA/TP53/PLK2/CNOT1/GTSE1/E2F8/E2F7	16
BP	GO:0009416	response to light stimulus	52/1752	314/18670	3.74434e-05	0.00108363	0.000895987	ATR/CCND1/BRCA2/CASP3/CDC25A/CHEK1/CREB1/CRY1/EGFR/EIF2S1/ELK1/EP300/ERCC4/FEN1/MTOR/MSH6/HIF1A/HMGCR/HMGCS1/HRH1/ITGB1/KRAS/MSH2/PCNA/POLH/PRKAA1/PTN/RBL2/RO60/TAF1/TP53/USP1/WRN/CUL4B/PIAS1/AURKB/CLOCK/PCLAF/POLD3/OPN3/POLK/DTL/PBK/RAD18/SLC4A10/NETO1/RHNO1/PPP1R1B/TANC1/SDE2/DHX36/EIF2AK4	52
BP	GO:0016311	dephosphorylation	72/1752	478/18670	3.78235e-05	0.00108924	0.000900625	ATP1A1/CDC25A/CDC25C/CDKN3/RCAN1/DUSP4/DUSP5/DUSP6/MTOR/GSK3B/IGFBP3/ITGA1/PPP1R12A/NT5E/OCRL/PPP1R1A/PPP2R5E/EIF2AK2/PSPH/PTBP1/PTN/PTPN4/PTPN9/PTPN12/PTPN13/PTPRG/PTPRO/PTPRZ1/ROCK1/TGFB2/PPM1D/PLPP2/RNGTT/IQGAP1/SYNJ1/PKMYT1/MTMR6/ROCK2/LPIN2/DLGAP5/PLPPR4/PPM1E/LMTK2/PHLPP2/RRP1B/SMG6/CTDSPL2/CYCS/SSH1/CEP192/CTTNBP2NL/KNL1/TIGAR/SLC39A10/RPRD1B/LHPP/CSRNP3/DUSP16/CSRNP2/PPP1R14C/PPP1R1B/PPP1…	72
BP	GO:0000723	telomere maintenance	32/1752	162/18670	3.93143e-05	0.00112662	0.000931533	ATR/ATRX/BRCA2/CCT6A/ERCC4/FEN1/NEK2/PCNA/POLA1/PRIM1/PKIB/PRKDC/RAD51/RFC3/WRN/XRCC5/TNKS/EXO1/AURKB/DCLRE1A/RAD50/POLD3/SMG1/SMC5/SMG6/POT1/GNL3L/RIF1/DCLRE1B/SMC6/DCP2/DHX36	32
BP	GO:0042752	regulation of circadian rhythm	25/1752	114/18670	4.52039e-05	0.00128908	0.00106586	ARNTL/CDK1/CREB1/CRY1/EZH2/MTOR/GSK3B/KCNA2/PRKAA1/PRKDC/PROX1/PTGDS/RORB/KLF10/TOP2A/TP53/UBE3A/USP9X/TIMELESS/ROCK2/CLOCK/NLGN1/OPN3/ARNTL2/SPSB4	25
BP	GO:0051053	negative regulation of DNA metabolic process	31/1752	156/18670	4.57392e-05	0.00129802	0.00107325	ATR/BMPR2/BRCA2/CDC6/ERCC4/MSH6/MSH2/MSH3/TP53/TP53BP1/XRCC5/ZNF91/SMC1A/TNKS/TIMELESS/TRIP12/RAD50/STAG2/PDS5A/SMG6/SMCHD1/POT1/FBXO5/UBR5/GNL3L/PARPBP/RIF1/ZNF93/RMI2/DCP2/RNF169	31
BP	GO:1904031	positive regulation of cyclin-dependent protein kinase activity	12/1752	35/18670	4.80688e-05	0.00135754	0.00112246	CCND1/CCNB1/CCND2/CCNT1/CDC6/CKS1B/CKS2/EGFR/PKD2/PROX1/ADAM17/CCNYL1	12
BP	GO:0031667	response to nutrient levels	74/1752	499/18670	5.00849e-05	0.00140768	0.00116392	AGL/APAF1/APOE/ARSB/ATP2B1/CCND1/BMPR2/CBL/CNR1/COL1A1/CREB1/EGFR/EIF2S1/MTOR/HLCS/HMGCR/HMGCS1/TNC/IGFBP2/CXCL10/MAP1B/NPY/OPA1/TNFRSF11B/P2RY1/PCNA/MED1/PRKAA1/EIF2AK2/PROX1/PSPH/PTN/RPS6KB1/SFRP2/SNAI2/SRD5A1/SST/STAT1/STC1/TAF1/KLF10/TP53/TYMS/WRN/TRIM25/PPM1D/TNKS/TRIM24/XPR1/EIF2AK3/GDF15/NAMPT/POSTN/FSTL1/FAM107A/CHSY1/USP33/NNT/PANX1/PCSK1N/SH3GLB1/SLC38A2/SSH1/RMI1/CPEB4/SPX/BRIP1/LRRK2/…	74
BP	GO:0050769	positive regulation of neurogenesis	71/1752	474/18670	5.12016e-05	0.00143217	0.00118417	ALK/APOE/ARSB/ASPA/BMPR2/CDH4/CNR1/DAG1/E2F1/ECT2/EP300/EPHA3/EPHA4/ETV5/EZH2/FLNA/FN1/MTOR/HIF1A/ITGA3/LIF/CAPRIN1/MAG/MAP1B/NGFR/NRCAM/OPA1/PLXNA1/PLXNA2/PRKCI/MAPK6/PROX1/PTK7/TWF1/PTN/PTPRZ1/RARB/ROBO1/ROBO2/CCL3/SHOX2/SOX11/TCF4/TCF12/VEGFA/XRCC2/XRCC5/LRP8/FZD1/IQGAP1/NRP1/SEMA5A/DLG5/KIF20B/ACTR2/PLXNC1/NLGN1/ADNP/NIPBL/FBXW8/NIN/TNFRSF12A/TMEM106B/GJC2/KIDINS220/NKX6-2/PLXNA4/DHX36/ASPM/M…	71
BP	GO:0071902	positive regulation of protein serine/threonine kinase activity	54/1752	334/18670	5.24448e-05	0.00145996	0.00120715	ALK/ATP2B4/CCND1/CCNB1/CCND2/CCNT1/CDK1/CDC6/CKS1B/CKS2/CSPG4/DDX3X/DUSP5/DUSP6/EGFR/EPHA4/EZH2/F2R/ITGA1/KRAS/LTF/MAP3K1/KITLG/PKD2/PRKAA1/EIF2AK2/PROX1/ROBO1/SHC1/ADAM17/TGFBR1/THBS1/TRAF6/VEGFA/PDE5A/ADAM9/IQGAP1/GDF15/RASGRP1/TENM1/SPRY2/DBF4/PLCE1/MAP3K20/TCIM/CEMIP/KIDINS220/TAOK1/ALS2/PDGFD/LRRK2/IQGAP3/CCNYL1/TAB3	54
BP	GO:0051216	cartilage development	38/1752	209/18670	5.38436e-05	0.0014918	0.00123347	ATP7A/BMPR2/SERPINH1/CHI3L1/COL1A1/COL6A2/COL12A1/EVC/HIF1A/HOXA5/ITGB8/LOXL2/LRP6/LUM/SMAD1/SMAD5/MGP/RARB/SFRP2/SHOX2/SNAI2/SOX5/STC1/TGFBI/TGFBR1/TIMP1/TYMS/COL14A1/CCN4/TRIP11/EIF2AK3/CHSY1/SATB2/POC1A/CHST11/MEX3C/LNPK/SNORC	38
BP	GO:0070317	negative regulation of G0 to G1 transition	13/1752	41/18670	5.97373e-05	0.00164728	0.00136203	APAF1/BRCA1/CHEK1/E2F1/EZH2/RAD51/RBBP8/RNF2/RRM2/CDC7/CBX5/SUZ12/PHC3	13
BP	GO:0034329	cell junction assembly	42/1752	241/18670	6.22912e-05	0.00170476	0.00140955	ACTN1/APC/CAV1/CDH2/CDH4/CDH6/CDH11/CTNND1/ACE/ECT2/EPHA2/EPHA3/FLNA/FN1/GJB1/GJB2/ITGA5/KDR/LAMC1/AFDN/MMP14/PRKCI/PKN2/PTPRO/ROCK1/SNAI2/THBS1/VCL/VEGFA/PIP5K1A/IQGAP1/NRP1/DLG5/ROCK2/GJC1/FERMT2/FAM107A/FBLIM1/HEG1/EPB41L5/PEAK1/MTDH	42
BP	GO:0034605	cellular response to heat	28/1752	137/18670	6.24047e-05	0.00170476	0.00140955	ATP2A2/ATR/CAMK2D/EIF2S1/EP300/MTOR/GSK3B/HSPA2/CXCL10/NUP98/RANBP2/HSPA13/THBS1/TPR/BAG5/NUP155/NUP58/POM121/NUP153/HSPH1/NUP205/NUP160/MYOF/NDC1/TCIM/CLPB/DHX36/POM121C	28
BP	GO:0071560	cellular response to transforming growth factor beta stimulus	43/1752	249/18670	6.3797e-05	0.00173469	0.0014343	APAF1/BMPR2/CAV1/CBL/CDKN1C/COL1A1/COL1A2/COL3A1/COL4A2/CREB1/EP300/FMOD/GCNT2/GDF10/ITGA3/LOX/LTBP1/SMAD1/SMAD5/SOX5/SOX11/ADAM17/TGFB2/TGFBR1/THBS1/TP53/USP9X/ADAM9/NREP/TGFBRAP1/GDF15/POSTN/FERMT2/PEG10/LEMD3/CHST11/TRIM33/RNF111/TWSG1/EPB41L5/PDGFD/NPNT/BCL9L	43
BP	GO:0051031	tRNA transport	12/1752	36/18670	6.59807e-05	0.00178495	0.00147586	NUP98/RANBP2/TPR/NUP155/NUP58/POM121/NUP153/XPOT/NUP205/NUP160/NDC1/POM121C	12
BP	GO:0034501	protein localization to kinetochore	8/1752	17/18670	6.62564e-05	0.00178495	0.00147586	CDK1/TTK/ZW10/AURKB/NDC80/KNL1/HASPIN/CHAMP1	8
BP	GO:0061448	connective tissue development	46/1752	273/18670	6.69374e-05	0.00179503	0.00148419	ATP7A/BMPR2/SERPINH1/CDK4/CHI3L1/COL1A1/COL5A1/COL6A2/COL12A1/EVC/HIF1A/HOXA5/ITGB8/LOX/LOXL2/LRP6/LUM/SMAD1/SMAD5/MGP/PIK3CA/RARB/SFRP2/SHOX2/SNAI2/SOX5/STC1/TGFBI/TGFBR1/TIMP1/TYMS/COL14A1/CCN4/TRIP11/EIF2AK3/CHSY1/PAXIP1/SATB2/POC1A/CHST11/MEX3C/ARRDC3/PDGFD/LNPK/SH3PXD2B/SNORC	46
BP	GO:0071901	negative regulation of protein serine/threonine kinase activity	29/1752	145/18670	7.02634e-05	0.00187562	0.00155083	APC/APOE/CASP3/CAV1/CDKN1C/CDKN2C/DUSP4/DUSP5/DUSP6/HMGCR/LRP6/PLK1/PKIB/PRKAR2B/RB1/SFRP2/NR2F2/YWHAG/LATS1/SPRY1/SPRY2/IPO7/HEG1/DUSP16/SPRY4/SPRED1/ZNF675/SPRED2/SPRED3	29
BP	GO:0071496	cellular response to external stimulus	54/1752	339/18670	7.86716e-05	0.00209052	0.00172852	ATP1A1/ATP2B1/BMPR2/CASP2/CBL/CHEK1/COL1A1/DAG1/EGFR/EIF2S1/MTOR/TNC/ITGA4/MAG/MAP3K1/MYD88/OPA1/P2RY1/MED1/PRKAA1/EIF2AK2/PTN/SFRP2/SKP2/SNAI2/SRD5A1/TAF1/KLF10/TP53/WRN/PPM1D/TNKS/TRIM24/XPR1/EIF2AK3/CASP8AP2/NAMPT/POSTN/FAM107A/USP33/ADNP/SH3GLB1/SLC38A2/SSH1/CPEB4/BRIP1/LRRK2/MTPN/SESN3/BMT2/MIR125B1/EIF2AK4/MAP1LC3C/CASTOR2	54
BP	GO:0042552	myelination	27/1752	132/18670	8.25158e-05	0.00218275	0.00180478	ABCD2/ASPA/MYRF/DAG1/MTOR/MAG/MAL/MBP/MYO5A/PLP1/POU3F2/KLK6/PTN/PTPRZ1/RARB/SCN2A/CNTN2/ATRN/BCAS1/B4GALT5/EIF2AK3/KIF14/FA2H/SBF2/NKX6-2/FAM126A/PIKFYVE	27
BP	GO:0060541	respiratory system development	36/1752	198/18670	8.35783e-05	0.0022009	0.00181978	ATP7A/BMPR2/CHI3L1/CREB1/DAG1/EGFR/EP300/HOXA5/TNC/IGFBP5/ITGA3/KRAS/LIF/LOX/LRP6/MMP14/PROX1/PTK7/PTN/SIM2/SOX11/SP3/TBX5/VEGFA/TIMELESS/DLG5/PHF14/SPRY1/SPRY2/SEC24B/PDPN/MAN1A2/SMCHD1/HEG1/RDH10/ATXN1L	36
BP	GO:0007265	Ras protein signal transduction	67/1752	448/18670	8.64377e-05	0.00226599	0.0018736	APOE/RND3/ARHGDIG/CBL/CCNA2/CDK2/COL1A2/COL3A1/DNMT1/ECT2/EPS8/F2R/F2RL2/FOXM1/ITGA3/ITGB1/KRAS/MET/KITLG/NGFR/NOTCH2/NRAS/RASA1/RB1/ROBO1/ROCK1/SHC1/SOS1/TGFB2/TP53/TRIO/CUL3/CTNNAL1/NRP1/USP8/ARHGAP29/ROCK2/G3BP2/KIF14/RASGRP1/SPRY1/SPRY2/VAV3/ARFGEF2/ARFGEF1/PDPN/PLK2/NCKAP1/RAB31/PSD3/ARHGEF12/GPSM2/ARHGEF3/PLCE1/RAB23/RAB8B/SHC3/RAB39A/RHOJ/HEG1/ALS2/PLEKHG2/SPRY4/SSX2IP/IQGAP3/ARHGAP42/TRIM…	67
BP	GO:0007063	regulation of sister chromatid cohesion	9/1752	22/18670	8.85656e-05	0.0023114	0.00191115	ATRX/BUB1/FEN1/RB1/TNKS/ESPL1/SMC5/NIPBL/CDCA5	9
BP	GO:0006270	DNA replication initiation	12/1752	37/18670	8.93653e-05	0.00232191	0.00191984	CDC6/CDK2/MCM2/MCM4/MCM6/ORC1/ORC5/POLA1/PRIM1/CDC45/ORC6/MCM10	12
BP	GO:0090329	regulation of DNA-dependent DNA replication	15/1752	54/18670	9.20417e-05	0.00237398	0.0019629	ATRX/BRCA2/CDK2/MSH6/MSH3/RFC3/SMC1A/CDC7/TIMELESS/STAG2/DBF4/FBXO5/DSCC1/E2F8/E2F7	15
BP	GO:0033260	nuclear DNA replication	16/1752	60/18670	9.28394e-05	0.00237398	0.0019629	ATRX/BRCA2/FEN1/MCM2/MCM4/MCM6/PCNA/POLA1/PRIM1/RAD51/RFC3/CDC7/CDC45/GINS1/POLD3/DBF4	16
BP	GO:0043486	histone exchange	16/1752	60/18670	9.28394e-05	0.00237398	0.0019629	CENPA/CENPI/OIP5/PSME4/RSF1/MIS18BP1/HJURP/CENPN/KNL1/CENPK/CENPH/CENPO/CENPU/CENPL/SPTY2D1/CENPW	16
BP	GO:0007179	transforming growth factor beta receptor signaling pathway	36/1752	199/18670	9.29939e-05	0.00237398	0.0019629	BMPR2/CAV1/CBL/CDKN1C/COL1A2/COL3A1/CREB1/EP300/FMOD/GCNT2/GDF10/ITGA3/LOX/LTBP1/SMAD1/SMAD5/SOX11/ADAM17/TGFB2/TGFBR1/THBS1/TP53/USP9X/ADAM9/NREP/TGFBRAP1/GDF15/FERMT2/PEG10/LEMD3/CHST11/TRIM33/RNF111/TWSG1/NPNT/BCL9L	36
BP	GO:0001952	regulation of cell-matrix adhesion	25/1752	119/18670	9.49964e-05	0.00241132	0.00199377	JAG1/CDK6/DAG1/EPHA3/GSK3B/HOXA7/KDR/MMP14/SERPINE1/PLAU/RASA1/ROCK1/THBS1/VEGFA/CASK/IQGAP1/NRP1/ROCK2/POSTN/FAM107A/EPB41L5/PLEKHA2/PEAK1/ACER2/NEXMIF	25
BP	GO:0010769	regulation of cell morphogenesis involved in differentiation	49/1752	301/18670	9.59375e-05	0.00241132	0.00199377	APOE/BMPR2/CDH2/CDH4/DCC/EPHA4/FLNA/FN1/GBP1/GSK3B/CAPRIN1/MAG/MAP1B/NEDD9/NGFR/NRCAM/OPA1/PLXNA1/PLXNA2/POU3F2/PTPRO/ROBO1/ROBO2/SHOX2/CNTN2/NR2E1/UBE3A/VEGFA/LRP8/NRP1/SEMA5A/ACTR2/PLXNC1/PDPN/POSTN/LZTS1/NLGN1/ARC/ADNP/SIPA1L1/FBXW8/NIN/TNFRSF12A/SEMA6D/PLXNA4/LRRK2/WDR36/DHX36/DRAXIN	49
BP	GO:0051348	negative regulation of transferase activity	47/1752	285/18670	9.60387e-05	0.00241132	0.00199377	ADAR/APC/APOE/CASP3/CAV1/CBL/CDKN1C/CDKN2C/DUSP4/DUSP5/DUSP6/GSK3B/HMGCR/LRP6/MAD2L1/PLK1/PKIB/PRKAR2B/RB1/SFRP2/NR2F2/TP53/YWHAG/SOCS3/LATS1/BAG5/SPRY1/SPRY2/IPO7/PPM1E/POT1/FBXO5/TRIB2/DBNDD2/HEG1/TRIB3/DUSP16/SPRY4/PPP1R1B/UBASH3B/SOCS4/SMCR8/DTX3L/SPRED1/ZNF675/SPRED2/SPRED3	47
BP	GO:0072001	renal system development	48/1752	293/18670	9.61063e-05	0.00241132	0.00199377	JAG1/ANGPT2/APAF1/CDKN1C/CENPF/COL4A1/ACE/EFNB2/ENPEP/EPHA4/ITGA3/LIF/SMAD1/SMAD5/MMP9/NID1/PKD2/PODXL/PPAT/PROX1/PTPRO/RARB/ROBO2/SDC1/SOX11/STAT1/TGFB2/TGFBR1/VEGFA/DCHS1/IQGAP1/NRP1/DLG5/CRLF1/SPRY1/NUP160/NIPBL/SEC61A1/RRM2B/PLCE1/KIF26B/CEP55/CPLANE1/PDGFD/LRRK2/RDH10/BMPER/NPNT	48
BP	GO:0002064	epithelial cell development	37/1752	207/18670	9.69953e-05	0.00242322	0.00200361	JAG1/ARNTL/ATRX/CDK6/S1PR3/EPHA2/FLNA/FOSL2/GSK3B/HIF1A/HOXA5/INSM1/MET/AFDN/MSN/PDE4D/PODXL/PROX1/RARB/ROCK1/SDC1/STC1/TYMS/VEGFA/IQGAP1/ROCK2/SLC4A7/CLOCK/SEC24B/FNDC3A/SIPA1L3/TIGAR/HEG1/SHROOM3/EPB41L5/HAPLN2/FRMD6	37
BP	GO:0010971	positive regulation of G2/M transition of mitotic cell cycle	10/1752	27/18670	9.75887e-05	0.00242767	0.00200729	CCND1/CCNB1/CDK1/CDC25A/CDC25C/CDK4/HSPA2/CDC7/FBXO5/DTL	10
BP	GO:0006110	regulation of glycolytic process	19/1752	79/18670	9.83958e-05	0.00243738	0.00201532	HIF1A/NUP98/PRKAA1/RANBP2/STAT3/TP53/TPR/NCOR1/NUP155/NUP58/POM121/NUP153/NUP205/NUP160/ZBTB20/NUPR1/NDC1/TIGAR/POM121C	19
BP	GO:0010749	regulation of nitric oxide mediated signal transduction	6/1752	10/18670	0.000101951	0.00249376	0.00206193	ATP2B4/EGFR/GUCY1A2/THBS1/VEGFA/PDE5A	6
BP	GO:0032875	regulation of DNA endoreduplication	6/1752	10/18670	0.000101951	0.00249376	0.00206193	MSH6/SMC1A/STAG2/FBXO5/E2F8/E2F7	6
BP	GO:0051231	spindle elongation	6/1752	10/18670	0.000101951	0.00249376	0.00206193	PRC1/AURKB/KIF23/KIF4A/RACGAP1/MAP10	6
BP	GO:0007369	gastrulation	34/1752	185/18670	0.000104474	0.00253445	0.00209557	BMPR2/COL4A2/COL5A1/COL5A2/COL8A1/COL12A1/DAG1/DLD/EPHA2/EXT2/FN1/ITGA3/ITGA4/ITGA5/ITGA7/ITGAV/ITGB1/LAMB1/LRP6/SMAD1/MBP/MMP2/MMP9/MMP14/RNF2/SFRP2/TP53/TXNRD1/KDM6A/CUL3/RTF1/TWSG1/EPB41L5/CDC73	34
BP	GO:0001822	kidney development	46/1752	278/18670	0.000104482	0.00253445	0.00209557	JAG1/ANGPT2/APAF1/CDKN1C/CENPF/ACE/EFNB2/ENPEP/EPHA4/ITGA3/LIF/SMAD1/SMAD5/MMP9/NID1/PKD2/PODXL/PPAT/PROX1/PTPRO/RARB/ROBO2/SDC1/SOX11/STAT1/TGFB2/TGFBR1/VEGFA/DCHS1/IQGAP1/NRP1/DLG5/CRLF1/SPRY1/NUP160/NIPBL/SEC61A1/RRM2B/PLCE1/KIF26B/CPLANE1/PDGFD/LRRK2/RDH10/BMPER/NPNT	46
BP	GO:0007272	ensheathment of neurons	27/1752	134/18670	0.000107853	0.00259468	0.00214538	ABCD2/ASPA/MYRF/DAG1/MTOR/MAG/MAL/MBP/MYO5A/PLP1/POU3F2/KLK6/PTN/PTPRZ1/RARB/SCN2A/CNTN2/ATRN/BCAS1/B4GALT5/EIF2AK3/KIF14/FA2H/SBF2/NKX6-2/FAM126A/PIKFYVE	27
BP	GO:0008366	axon ensheathment	27/1752	134/18670	0.000107853	0.00259468	0.00214538	ABCD2/ASPA/MYRF/DAG1/MTOR/MAG/MAL/MBP/MYO5A/PLP1/POU3F2/KLK6/PTN/PTPRZ1/RARB/SCN2A/CNTN2/ATRN/BCAS1/B4GALT5/EIF2AK3/KIF14/FA2H/SBF2/NKX6-2/FAM126A/PIKFYVE	27
BP	GO:0048545	response to steroid hormone	59/1752	385/18670	0.000114019	0.00273178	0.00225873	AGL/ANXA1/ARNTL/ATP1A1/ATP2B1/CCND1/BRCA1/CASP3/CAV1/CNGA3/COL1A1/CRY1/EGFR/EP300/GJB2/GLB1/IDH1/IGFBP2/KRAS/LOX/OXTR/PCNA/MED1/PTN/RARB/RB1/RORB/SDC1/SKP2/SRD5A1/SST/STC1/TAF1/NR2F2/TFPI/TGFB2/THBS1/NR2E1/NR2C2/TYMS/UBE3A/KMT2D/NCOA3/NRIP1/PIAS1/ADAM9/USP8/LATS1/CYP7B1/CLOCK/NCOR1/NCOA2/ABHD2/FAM107A/CNOT1/NCOA6/RBFOX2/UBR5/LBH	59
BP	GO:0003170	heart valve development	16/1752	61/18670	0.000115004	0.00274413	0.00226895	JAG1/BMPR2/ELN/MTOR/NOTCH2/RB1/ROBO1/ROBO2/ROCK1/SHOX2/SNAI2/TBX5/TGFB2/DCHS1/ROCK2/HECTD1	16
BP	GO:0003205	cardiac chamber development	32/1752	171/18670	0.000115991	0.00275643	0.00227912	JAG1/BMPR2/HIF1A/LTBP1/MYH10/MYL3/NOTCH2/MED1/PROX1/PTK7/RARB/ROBO1/ROBO2/SFRP2/SHOX2/SOS1/SOX11/TBX5/TGFB2/TGFBR1/TP53/NSD2/LUZP1/FZD1/NRP2/NRP1/TRIP11/ADAMTS6/HECTD1/PARVA/HEG1/CPLANE1	32
BP	GO:0097064	ncRNA export from nucleus	12/1752	38/18670	0.000119536	0.00282037	0.00233199	NUP98/RANBP2/TPR/NUP155/NUP58/POM121/NUP153/XPOT/NUP205/NUP160/NDC1/POM121C	12
BP	GO:0090110	cargo loading into COPII-coated vesicle	7/1752	14/18670	0.000120008	0.00282037	0.00233199	SEC24C/SEC24D/SEC24B/SEC23A/SEC24A/SEC31A/MIA3	7
BP	GO:0034332	adherens junction organization	28/1752	142/18670	0.000120129	0.00282037	0.00233199	ACTN1/CDH2/CDH4/CDH6/CDH11/CTNND1/EPHA3/KDR/AFDN/MMP14/PVR/ROCK1/THBS1/VCL/VEGFA/PIP5K1A/IQGAP1/NRP1/DLG5/ROCK2/FERMT2/FAM107A/RASSF8/CADM1/NECTIN3/RAB8B/EPB41L5/PEAK1	28
BP	GO:0021543	pallium development	32/1752	172/18670	0.000129915	0.00303792	0.00251187	ALK/ATP2B4/CASP3/CDH2/CDK6/COL3A1/EGFR/EZH2/FLNA/GART/GSK3B/HIF1A/LAMB1/LRP6/NPY/POU3F2/PROX1/ROBO1/SRD5A1/NR2E1/LRP8/NRP2/NRP1/KIF14/TACC3/XRN2/PHLPP2/SYNE2/SLC38A2/GNG12/ASPM/WDR62	32
BP	GO:0006470	protein dephosphorylation	51/1752	321/18670	0.000131038	0.00305199	0.00252349	CDC25A/CDC25C/CDKN3/RCAN1/DUSP4/DUSP5/DUSP6/MTOR/GSK3B/IGFBP3/ITGA1/PPP1R12A/PPP1R1A/PPP2R5E/EIF2AK2/PTBP1/PTN/PTPN4/PTPN9/PTPN12/PTPN13/PTPRG/PTPRO/PTPRZ1/ROCK1/PPM1D/PLPP2/RNGTT/MTMR6/ROCK2/DLGAP5/PPM1E/LMTK2/PHLPP2/CTDSPL2/CYCS/SSH1/CTTNBP2NL/SLC39A10/RPRD1B/LHPP/DUSP16/PPP1R14C/PPP1R1B/PPP1R15B/MASTL/UBASH3B/PPP1R14A/CDCA2/BOD1L1/TIPRL	51
BP	GO:0040001	establishment of mitotic spindle localization	11/1752	33/18670	0.000132619	0.00307655	0.0025438	CENPA/MAD2L1/PLK1/ZW10/ESPL1/SPRY1/SPRY2/NDC80/GPSM2/NUSAP1/UBXN2B	11
BP	GO:0010976	positive regulation of neuron projection development	46/1752	281/18670	0.000135329	0.00312037	0.00258003	ALK/APOE/ARSB/BMPR2/CDH4/CNR1/EP300/EPHA3/EPHA4/EZH2/FN1/MTOR/ITGA3/CAPRIN1/MAP1B/NGFR/OPA1/PLXNA1/PLXNA2/PRKCI/MAPK6/PTK7/TWF1/PTN/ROBO1/ROBO2/SHOX2/VEGFA/LRP8/FZD1/IQGAP1/NRP1/SEMA5A/DLG5/ACTR2/PLXNC1/NLGN1/ADNP/FBXW8/NIN/TNFRSF12A/TMEM106B/KIDINS220/PLXNA4/DHX36/TRIM67	46
BP	GO:0033627	cell adhesion mediated by integrin	17/1752	68/18670	0.000135575	0.00312037	0.00258003	EPHA2/ITGA4/ITGA5/ITGAV/ITGB1/ITGB8/SERPINE1/PLAU/PODXL/SFRP2/SNAI2/ADAM17/TGFB2/ADAM9/NPNT/ACER2/NEXMIF	17
BP	GO:0030811	regulation of nucleotide catabolic process	19/1752	81/18670	0.000140584	0.00322296	0.00266486	HIF1A/NUP98/PRKAA1/RANBP2/STAT3/TP53/TPR/NCOR1/NUP155/NUP58/POM121/NUP153/NUP205/NUP160/ZBTB20/NUPR1/NDC1/TIGAR/POM121C	19
BP	GO:0071156	regulation of cell cycle arrest	23/1752	108/18670	0.00014352	0.00327742	0.00270989	CCND1/BRCA1/CASP2/CCNB1/CDK1/CDC25C/CDK2/CDK4/E2F1/EP300/FOXM1/INSM1/PCNA/PKD2/RBL2/AURKA/TP53/PLK2/CNOT1/GTSE1/E2F8/E2F7/SDE2	23
BP	GO:0043547	positive regulation of GTPase activity	61/1752	405/18670	0.000144104	0.00327794	0.00271032	ARHGDIG/CHM/CHML/ECT2/EPHA2/EZH2/F2R/GSK3B/ITGB1/AFDN/NEDD9/OCRL/RANBP2/RASA1/RGS16/RP2/CCL3/SOS1/PIP5K1A/RGS11/IQGAP1/NRP1/ASAP2/ARHGAP29/RASAL2/STXBP5L/DOCK4/GIT2/ARHGAP11A/RGP1/RASGRP1/VAV3/SEC23A/ARFGEF1/ADAP1/SIPA1L3/SNX13/ARHGEF12/ACAP2/RAB3GAP2/SIPA1L1/RGS17/RACGAP1/ASAP1/FAM13B/TBC1D19/DEPDC1/DEPDC1B/RALGAPB/RALGAPA2/TBC1D14/SIPA1L2/ARHGAP20/ALS2/ARAP3/DOCK7/ARHGAP18/LRRK2/DOCK11/ARHGAP42…	61
BP	GO:0018205	peptidyl-lysine modification	60/1752	397/18670	0.000147981	0.00335308	0.00277245	ATP7A/ATRX/BRCA1/BRCA2/CHEK1/DNMT1/EP300/EZH2/LIF/LOX/LOXL2/NUP98/PRKAA1/RANBP2/RBBP5/RLF/SNAI2/TAF1/TPR/KDM6A/NSD2/KAT6A/KMT2D/NCOA3/TRRAP/PIAS1/GTF3C4/CLOCK/NUP155/HDAC9/NUP58/POM121/NUP153/HMG20A/BAZ1A/PAXIP1/NUP205/RTF1/NUP160/SUZ12/EPC2/BRPF3/SENP1/RSF1/GNL3L/ING3/BCOR/PRMT6/RIF1/NDC1/ASH1L/KMT2E/SMYD2/EP400/KIAA1586/KMT2C/NSD1/NAA50/TET3/POM121C	60
BP	GO:0048608	reproductive structure development	64/1752	431/18670	0.000151487	0.00341928	0.00282719	ANXA1/ATRX/CCND1/BMPR2/BOK/BRCA2/CASP2/CASP3/CBL/CCNF/CDKN1C/EGFR/FANCA/BPTF/FLNA/GJB1/GJB2/HIF1A/HMGCS1/HOXD13/TNC/IDH1/ITGB8/LIF/LRP6/KITLG/MMP14/MSH2/PKD2/MED1/PTN/PTX3/KDM5A/ROBO2/RRM1/SDC1/SFRP2/SMARCC1/SP3/SRD5A1/STC1/NR2F2/TGFB2/TGFBR1/TMF1/UBE3A/VEGFA/NRIP1/ADAM19/SOCS3/CYP7B1/PLK4/KDM5B/FNDC3A/NIPBL/NUPR1/ASH1L/BIRC6/E2F8/KIF18A/BRIP1/E2F7/RDH10/ASPM	64
BP	GO:0006469	negative regulation of protein kinase activity	40/1752	235/18670	0.000155433	0.00349485	0.00288966	ADAR/APC/APOE/CASP3/CAV1/CBL/CDKN1C/CDKN2C/DUSP4/DUSP5/DUSP6/HMGCR/LRP6/PLK1/PKIB/PRKAR2B/RB1/SFRP2/NR2F2/YWHAG/SOCS3/LATS1/SPRY1/SPRY2/IPO7/PPM1E/TRIB2/DBNDD2/HEG1/TRIB3/DUSP16/SPRY4/PPP1R1B/UBASH3B/SOCS4/SMCR8/SPRED1/ZNF675/SPRED2/SPRED3	40
BP	GO:0070997	neuron death	54/1752	348/18670	0.000157722	0.00353274	0.00292099	APAF1/APOE/BOK/CASP2/CASP3/CBL/CREB1/DCC/EFNB2/EIF2S1/ELK1/EN1/F2R/MTOR/GSK3B/HIF1A/ITGA1/KRAS/MAG/MSH2/MYBL2/NGFR/PIK3CA/PRKCI/PTPRZ1/RASA1/RB1/ROCK1/SCN2A/CCL3/SOD2/SRPK2/STAT3/TGFB2/TP53/XRCC2/FZD1/NRP1/CRLF1/BAG5/KIF14/NAMPT/HYOU1/CHL1/GPR75/ADNP/NUPR1/SSH1/OXR1/TIGAR/CPEB4/LRRK2/DRAXIN/MIR125B1	54
BP	GO:0007569	cell aging	24/1752	116/18670	0.000166559	0.00370033	0.00305957	ARNTL/ATR/BRCA2/CDK1/CDK6/CHEK1/FOXM1/MTOR/KRAS/OPA1/SERPINE1/PRKDC/RBL1/TP53/WRN/KAT6A/NAMPT/PLK2/NEK6/SMC5/FBXO5/PRMT6/SMC6/MIR590	24
BP	GO:0021987	cerebral cortex development	24/1752	116/18670	0.000166559	0.00370033	0.00305957	CDH2/COL3A1/EGFR/FLNA/GART/GSK3B/HIF1A/LAMB1/LRP6/NPY/POU3F2/ROBO1/SRD5A1/NR2E1/LRP8/NRP2/NRP1/KIF14/TACC3/SYNE2/SLC38A2/GNG12/ASPM/WDR62	24
BP	GO:0071158	positive regulation of cell cycle arrest	19/1752	82/18670	0.000167104	0.00370033	0.00305957	BRCA1/CASP2/CCNB1/CDK1/CDC25C/CDK2/E2F1/EP300/INSM1/PCNA/PKD2/RBL2/AURKA/TP53/PLK2/CNOT1/GTSE1/E2F8/E2F7	19
BP	GO:0031668	cellular response to extracellular stimulus	44/1752	268/18670	0.000175	0.00386057	0.00319206	ATP2B1/BMPR2/CBL/COL1A1/EIF2S1/MTOR/TNC/ITGA4/OPA1/P2RY1/MED1/PRKAA1/EIF2AK2/PTN/SFRP2/SKP2/SNAI2/SRD5A1/TAF1/KLF10/TP53/WRN/PPM1D/TNKS/TRIM24/XPR1/EIF2AK3/NAMPT/POSTN/FAM107A/USP33/ADNP/SH3GLB1/SLC38A2/SSH1/CPEB4/BRIP1/LRRK2/SESN3/BMT2/MIR125B1/EIF2AK4/MAP1LC3C/CASTOR2	44
BP	GO:0031346	positive regulation of cell projection organization	58/1752	383/18670	0.000179328	0.00394116	0.00325869	ALK/APC/APOE/ARSB/ATP7A/BMPR2/CDH4/CNR1/EP300/EPHA3/EPHA4/EPS8/EZH2/FN1/MTOR/ITGA3/CAPRIN1/MAP1B/NGFR/OPA1/PLXNA1/PLXNA2/PRKCI/MAPK6/PTK7/TWF1/PTN/ROBO1/ROBO2/SHOX2/TGFBR1/VEGFA/LRP8/FZD1/IQGAP1/NRP1/WASL/SEMA5A/DLG5/CEP135/ACTR2/PLXNC1/TENM1/NCKAP1/NLGN1/ADNP/FBXW8/NIN/TNFRSF12A/RAB8B/TMEM106B/MNS1/CCDC88A/KIDINS220/PLXNA4/DOCK11/DHX36/TRIM67	58
BP	GO:0061008	hepaticobiliary system development	27/1752	138/18670	0.000180263	0.00394689	0.00326343	AK4/ANXA1/ATP7A/CCND1/EGFR/EZH2/HMGCS1/IGF2R/KRAS/MET/PCNA/PIK3CA/PKD2/MED1/PROX1/PTN/RARB/SP3/SRD5A1/AURKA/TYMS/CUL3/NIPBL/WDR35/GNPNAT1/E2F8/E2F7	27
BP	GO:0032200	telomere organization	32/1752	175/18670	0.000181132	0.00395111	0.00326692	ATR/ATRX/BRCA2/CCT6A/ERCC4/FEN1/NEK2/PCNA/POLA1/PRIM1/PKIB/PRKDC/RAD51/RFC3/WRN/XRCC5/TNKS/EXO1/AURKB/DCLRE1A/RAD50/POLD3/SMG1/SMC5/SMG6/POT1/GNL3L/RIF1/DCLRE1B/SMC6/DCP2/DHX36	32
BP	GO:0061458	reproductive system development	64/1752	434/18670	0.000184811	0.00401637	0.00332088	ANXA1/ATRX/CCND1/BMPR2/BOK/BRCA2/CASP2/CASP3/CBL/CCNF/CDKN1C/EGFR/FANCA/BPTF/FLNA/GJB1/GJB2/HIF1A/HMGCS1/HOXD13/TNC/IDH1/ITGB8/LIF/LRP6/KITLG/MMP14/MSH2/PKD2/MED1/PTN/PTX3/KDM5A/ROBO2/RRM1/SDC1/SFRP2/SMARCC1/SP3/SRD5A1/STC1/NR2F2/TGFB2/TGFBR1/TMF1/UBE3A/VEGFA/NRIP1/ADAM19/SOCS3/CYP7B1/PLK4/KDM5B/FNDC3A/NIPBL/NUPR1/ASH1L/BIRC6/E2F8/KIF18A/BRIP1/E2F7/RDH10/ASPM	64
BP	GO:0031669	cellular response to nutrient levels	40/1752	237/18670	0.000186963	0.0040481	0.00334711	ATP2B1/BMPR2/CBL/COL1A1/EIF2S1/MTOR/TNC/OPA1/P2RY1/MED1/PRKAA1/EIF2AK2/PTN/SNAI2/SRD5A1/TAF1/KLF10/TP53/WRN/PPM1D/TNKS/TRIM24/XPR1/EIF2AK3/NAMPT/POSTN/FAM107A/USP33/SH3GLB1/SLC38A2/SSH1/CPEB4/BRIP1/LRRK2/SESN3/BMT2/MIR125B1/EIF2AK4/MAP1LC3C/CASTOR2	40
BP	GO:0034976	response to endoplasmic reticulum stress	46/1752	285/18670	0.000189252	0.00408224	0.00337534	APAF1/ATP2A2/CCND1/BOK/CANX/CAV1/EIF2S1/EP300/EXTL2/EXTL3/GFPT1/GSK3B/ITPR1/OPA1/EIF2AK2/SEL1L/SHC1/HSPA13/THBS1/TP53/TRIM25/UBE4A/EIF2AK3/PDIA4/PDIA6/HYOU1/KDELR3/SEC31A/ATF6/UBXN4/FAF2/FBXO2/NUPR1/MBTPS2/FKBP14/UGGT1/CCDC47/TRIB3/PDIA2/EDEM3/PPP1R15B/CREB3L1/NIBAN1/LRRK2/TMTC3/EIF2AK4	46
BP	GO:0002040	sprouting angiogenesis	33/1752	183/18670	0.000189936	0.00408224	0.00337534	ANXA1/E2F2/EFNB2/EPHA2/ITGA5/ITGB1/KDR/LOXL2/SMAD1/MEOX2/NGFR/ROBO1/S100A1/THBS1/NR2E1/VEGFA/PIK3R3/NRP1/SEMA5A/HDAC9/PLK2/ESM1/CEMIP2/SRPX2/PARVA/RHOJ/E2F8/CREB3L1/E2F7/SPRED1/BMPER/MIA3/MIR10B	33
BP	GO:0031398	positive regulation of protein ubiquitination	24/1752	117/18670	0.000191202	0.00408672	0.00337905	BRCA1/CAV1/CDC20/CRY1/PLK1/SEPTIN4/SKP2/TRAF6/UBE3A/CUL3/RNF40/MALT1/UBE2C/FAM107A/PAXIP1/RNF111/FANCI/ARRDC3/TRIB3/MARCHF7/MASTL/SPSB4/LRRK2/RNF180	24
BP	GO:0006024	glycosaminoglycan biosynthetic process	23/1752	110/18670	0.000191543	0.00408672	0.00337905	BGN/CLTC/NCAN/CSPG4/EXT2/EXTL2/EXTL3/FMOD/GCNT2/HSPG2/LUM/SDC1/B4GALT5/HS2ST1/HS3ST3B1/GPC6/CHSY1/SLC35D1/CHST11/CHPF2/CEMIP/XYLT1/DSEL	23
BP	GO:0051642	centrosome localization	10/1752	29/18670	0.000194555	0.00413589	0.00341971	MAD2L1/PLXNA2/RANBP2/AURKA/AKAP9/SYNE2/GPSM2/NIN/TBCCD1/ASPM	10
BP	GO:0046578	regulation of Ras protein signal transduction	40/1752	238/18670	0.000204792	0.00433773	0.0035866	APOE/CBL/COL3A1/ECT2/EPS8/F2R/F2RL2/FOXM1/ITGA3/ITGB1/KRAS/MET/KITLG/NOTCH2/RASA1/ROBO1/SHC1/SOS1/TGFB2/TRIO/CUL3/NRP1/KIF14/RASGRP1/SPRY1/SPRY2/VAV3/ARFGEF2/ARFGEF1/PSD3/ARHGEF12/ARHGEF3/PLCE1/HEG1/ALS2/PLEKHG2/SPRY4/SSX2IP/ARHGAP42/TRIM67	40
BP	GO:0042023	DNA endoreduplication	6/1752	11/18670	0.000206439	0.00434856	0.00359555	MSH6/SMC1A/STAG2/FBXO5/E2F8/E2F7	6
BP	GO:0035635	entry of bacterium into host cell	7/1752	15/18670	0.000206791	0.00434856	0.00359555	CAV1/CBL/CTNND1/ITGAV/MET/EXOC7/CBLL1	7
BP	GO:1903320	regulation of protein modification by small protein conjugation or removal	39/1752	231/18670	0.000221952	0.00465064	0.00384532	BRCA1/CAV1/CDC20/CRY1/MTOR/MAD2L1/PLK1/SEPTIN4/SKP2/TAF1/TGFBR1/TRAF6/UBE3A/CUL3/PIAS1/TRIP12/BAG5/RNF40/HMG20A/MALT1/UBE2C/FAM107A/PAXIP1/FBXO2/FBXO5/UBR5/GNL3L/OTUD4/RNF111/FANCI/ARRDC3/TRIB3/MARCHF7/ITCH/MASTL/SPSB4/LRRK2/DTX3L/RNF180	39
BP	GO:0060249	anatomical structure homeostasis	64/1752	437/18670	0.000224669	0.00468069	0.00387016	ACACA/ATP2B1/ATR/ATRX/AZGP1/BARD1/BRCA2/CCT6A/CNR1/EGFR/ERCC4/F2R/FEN1/GCNT2/HIF1A/KRAS/LOX/LTF/LYZ/NEK2/NELL2/TNFRSF11B/P2RY1/PCNA/POLA1/PRIM1/PRKAA1/PKIB/PRKDC/RAD51/RB1/RFC3/TF/TFRC/TRAF6/VEGFA/WRN/XRCC5/TNKS/EXO1/AURKB/HOMER1/DCLRE1A/USH1C/RAD50/POLD3/SMG1/SMC5/SMG6/POT1/GNL3L/RIF1/CRACD/TAOK1/DCLRE1B/SMC6/BBS10/LPCAT1/UBASH3B/WDR36/DCP2/DHX36/ZNF675/ILDR2	64
BP	GO:0003179	heart valve morphogenesis	14/1752	52/18670	0.000224987	0.00468069	0.00387016	JAG1/BMPR2/ELN/MTOR/NOTCH2/RB1/ROBO1/ROBO2/ROCK1/SNAI2/TBX5/TGFB2/DCHS1/ROCK2	14
BP	GO:0001933	negative regulation of protein phosphorylation	63/1752	429/18670	0.000232238	0.0048144	0.00398072	ADAR/APC/APOE/CASP3/CAV1/CBL/CCNB1/CDKN1C/CDKN2C/DAG1/DUSP4/DUSP5/DUSP6/FKTN/FOXM1/MTOR/GBP1/HMGCR/IGFBP3/INSM1/LIF/LRP6/PDE4D/PLK1/PKIB/PRKAR2B/PRKDC/PTPN13/RB1/SFRP2/NR2F2/TIMP3/YWHAG/SOCS3/LATS1/NCOR1/SPRY1/SPRY2/IPO7/PPM1E/NNT/TRIB2/KIRREL1/CHRNA9/DBNDD2/ASH1L/PBK/HEG1/TRIB3/DUSP16/SPRY4/ITCH/PPP1R1B/PPP1R15B/UBASH3B/NIBAN1/LRRK2/SOCS4/SMCR8/SPRED1/ZNF675/SPRED2/SPRED3	63
BP	GO:0061982	meiosis I cell cycle process	24/1752	119/18670	0.000250349	0.00517152	0.004276	BRCA2/CDC25A/CDC25C/CKS2/ERCC4/FANCD2/MSH6/HSPA2/MSH3/PLK1/RAD51/AURKA/TOP2A/RAD54L/PTTG1/TRIP13/ESPL1/RAD50/FBXO5/NDC1/RMI1/BRIP1/MND1/EME1	24
BP	GO:0090224	regulation of spindle organization	12/1752	41/18670	0.000267435	0.00546689	0.00452022	CLTC/PLK1/TPR/SMC1A/STAG1/TACC3/SPAG5/STAG2/TPX2/GPSM2/BORA/MAP9	12
BP	GO:0061842	microtubule organizing center localization	10/1752	30/18670	0.000267453	0.00546689	0.00452022	MAD2L1/PLXNA2/RANBP2/AURKA/AKAP9/SYNE2/GPSM2/NIN/TBCCD1/ASPM	10
BP	GO:1902751	positive regulation of cell cycle G2/M phase transition	10/1752	30/18670	0.000267453	0.00546689	0.00452022	CCND1/CCNB1/CDK1/CDC25A/CDC25C/CDK4/HSPA2/CDC7/FBXO5/DTL	10
BP	GO:0030261	chromosome condensation	13/1752	47/18670	0.000279601	0.00569529	0.00470907	CCNB1/CDK1/TOP2A/NCAPD2/SMC4/SMC2/NCAPD3/NCAPH/NIPBL/NUSAP1/NCAPG2/NCAPG/CDCA5	13
BP	GO:0001889	liver development	26/1752	135/18670	0.00030521	0.00619533	0.00512252	AK4/ANXA1/ATP7A/CCND1/EGFR/EZH2/HMGCS1/IGF2R/KRAS/MET/PCNA/PIK3CA/PKD2/MED1/PROX1/PTN/RARB/SP3/SRD5A1/AURKA/TYMS/CUL3/WDR35/GNPNAT1/E2F8/E2F7	26
BP	GO:1900034	regulation of cellular response to heat	18/1752	79/18670	0.000306834	0.00620676	0.00513198	ATR/CAMK2D/EP300/MTOR/GSK3B/NUP98/RANBP2/TPR/BAG5/NUP155/NUP58/POM121/NUP153/HSPH1/NUP205/NUP160/NDC1/POM121C	18
BP	GO:0050808	synapse organization	60/1752	408/18670	0.00031145	0.00627841	0.00519122	ACTN1/ADD2/APOE/CDC20/CDH2/COL4A1/DAG1/EFNB2/EPHA4/ETV5/F2R/GAP43/GRM5/TNC/IL1RAP/ITGA3/CAPRIN1/MAP1B/MYH10/MYO5A/NRCAM/OPA1/OXTR/PCDHGC3/PTN/PTPRO/ROBO2/SNCG/CNTN2/UBE3A/LRP8/FZD1/NRP2/NRP1/WASL/DLG5/HOMER1/ACTR2/NLGN1/IGSF9B/ARC/ADNP/FLRT3/SIPA1L1/PCDH17/SRPX2/SSH1/LRRN3/PCDHGC5/PCDHGC4/PCDHB13/NLGN4X/LRRN1/ALS2/PCDHB16/TANC1/LRRK2/SEZ6/DHX36/LRRTM3	60
BP	GO:0071695	anatomical structure maturation	30/1752	165/18670	0.00031413	0.00631066	0.00521789	ARCN1/BRCA2/CCNB1/CDKN1C/DAG1/MTOR/HIF1A/HOXA5/LTF/MMP2/MYO5A/NRCAM/OPA1/RB1/AURKA/CNTN2/TGFB2/TYMS/DCHS1/TRIP13/B4GALT5/PTBP3/ANKRD17/FBXO5/MBTPS2/XYLT1/NOM1/TUT7/LRRK2/ANO6	30
BP	GO:0021537	telencephalon development	41/1752	251/18670	0.000318915	0.00638485	0.00527922	ALK/ATP2B4/CASP3/CDH2/CDK6/COL3A1/EGFR/EZH2/FLNA/GART/GSK3B/HIF1A/LAMB1/LRP6/MYH10/NPY/OXTR/POU3F2/PROX1/RARB/ROBO1/ROBO2/SRD5A1/CNTN2/NR2E1/LRP8/NRP2/NRP1/KIF14/TACC3/XRN2/PHLPP2/SYNE2/NIN/SLC38A2/GNG12/PLXNA4/LRRK2/ARL13B/ASPM/WDR62	41
BP	GO:1902808	positive regulation of cell cycle G1/S phase transition	15/1752	60/18670	0.000330306	0.00659034	0.00544913	ANXA1/CCND1/CCND2/CDC6/DDX3X/EGFR/EZH2/ADAM17/CDC45/CUL4B/ANKRD17/KMT2E/CDC73/FAM83D/MIR590	15
BP	GO:0033273	response to vitamin	20/1752	93/18670	0.000331508	0.00659183	0.00545036	ATP2B1/CCND1/COL1A1/EGFR/HLCS/HMGCS1/TNC/CXCL10/MAP1B/MED1/PTN/SNAI2/STC1/TYMS/TRIM25/TRIM24/POSTN/NNT/BRIP1/MIR125B1	20
BP	GO:0031396	regulation of protein ubiquitination	35/1752	204/18670	0.000333283	0.00660465	0.00546096	BRCA1/CAV1/CDC20/CRY1/MTOR/MAD2L1/PLK1/SEPTIN4/SKP2/TAF1/TGFBR1/TRAF6/UBE3A/CUL3/TRIP12/BAG5/RNF40/MALT1/UBE2C/FAM107A/PAXIP1/FBXO2/FBXO5/UBR5/GNL3L/RNF111/FANCI/ARRDC3/TRIB3/MARCHF7/MASTL/SPSB4/LRRK2/DTX3L/RNF180	35
BP	GO:0060840	artery development	21/1752	100/18670	0.000335743	0.00663092	0.00548268	JAG1/APOE/BMPR2/COL3A1/EFNB2/LOX/LTBP1/MYH10/PKD2/PROX1/ROBO1/ROBO2/TGFB2/TGFBR1/VEGFA/LUZP1/NRP1/SEC24B/ADAMTS6/HECTD1/ARID2	21
BP	GO:0051382	kinetochore assembly	7/1752	16/18670	0.000337899	0.00665104	0.00549932	CENPA/CENPE/CENPF/CENPN/CENPK/CENPH/CENPW	7
BP	GO:1903578	regulation of ATP metabolic process	24/1752	122/18670	0.000369323	0.00724518	0.00599058	AK4/ATP7A/CCNB1/CDK1/HIF1A/NUP98/PGK1/PRKAA1/RANBP2/STAT3/TP53/TPR/NCOR1/NUP155/NUP58/POM121/NUP153/NUP205/NUP160/ZBTB20/NUPR1/NDC1/TIGAR/POM121C	24
BP	GO:0098727	maintenance of cell number	29/1752	159/18670	0.0003714	0.00726115	0.00600378	JAG1/BCL9/CDH2/EZH2/FANCC/FANCD2/LIF/LOXL2/NOTCH2/POLR2B/PROX1/PTN/STAT3/KLF10/NR2E1/NCOA3/SMC1A/MED14/MMP24/CNOT1/ZC3H13/RTF1/NIPBL/RIF1/CDC73/ZNF322/LBH/ASPM/BCL9L	29
BP	GO:0006023	aminoglycan biosynthetic process	23/1752	115/18670	0.000378568	0.00726115	0.00600378	BGN/CLTC/NCAN/CSPG4/EXT2/EXTL2/EXTL3/FMOD/GCNT2/HSPG2/LUM/SDC1/B4GALT5/HS2ST1/HS3ST3B1/GPC6/CHSY1/SLC35D1/CHST11/CHPF2/CEMIP/XYLT1/DSEL	23
BP	GO:0010452	histone H3-K36 methylation	6/1752	12/18670	0.000380074	0.00726115	0.00600378	NSD2/PAXIP1/BCOR/ASH1L/SMYD2/NSD1	6
BP	GO:0034086	maintenance of sister chromatid cohesion	6/1752	12/18670	0.000380074	0.00726115	0.00600378	ATRX/RB1/TNKS/SMC5/NIPBL/DSCC1	6
BP	GO:0034088	maintenance of mitotic sister chromatid cohesion	6/1752	12/18670	0.000380074	0.00726115	0.00600378	ATRX/RB1/TNKS/SMC5/NIPBL/DSCC1	6
BP	GO:0051095	regulation of helicase activity	6/1752	12/18670	0.000380074	0.00726115	0.00600378	MSH6/MCM2/MSH2/MSH3/TP53/POT1	6
BP	GO:0060707	trophoblast giant cell differentiation	6/1752	12/18670	0.000380074	0.00726115	0.00600378	LIF/NR2F2/SOCS3/PLK4/E2F8/E2F7	6
BP	GO:2000105	positive regulation of DNA-dependent DNA replication	6/1752	12/18670	0.000380074	0.00726115	0.00600378	ATRX/CDK2/CDC7/DBF4/E2F8/E2F7	6
BP	GO:0000018	regulation of DNA recombination	21/1752	101/18670	0.000387016	0.00736969	0.00609352	CHEK1/MSH6/KPNA2/MSH2/MSH3/RAD51/TFRC/TP53BP1/NSD2/WRN/TIMELESS/ACTR2/RAD50/RAD51AP1/PAXIP1/SMCHD1/PARPBP/RIF1/SMARCAD1/FIGNL1/RMI2	21
BP	GO:0006027	glycosaminoglycan catabolic process	15/1752	61/18670	0.000400513	0.00758824	0.00627423	ARSB/BGN/NCAN/CSPG4/FMOD/GLB1/GNS/HMMR/HSPG2/LUM/SDC1/GPC6/CEMIP2/CEMIP/HPSE2	15
BP	GO:0060998	regulation of dendritic spine development	17/1752	74/18670	0.000402831	0.00758824	0.00627423	APOE/EPHA4/MTOR/CAPRIN1/OPA1/MAPK6/UBE3A/LRP8/DLG5/ACTR2/PLK2/NLGN1/ARC/SIPA1L1/ASAP1/LRRK2/DHX36	17
BP	GO:1900006	positive regulation of dendrite development	17/1752	74/18670	0.000402831	0.00758824	0.00627423	ALK/APOE/EPHA4/EZH2/MTOR/CAPRIN1/OPA1/MAPK6/PTN/LRP8/IQGAP1/DLG5/ACTR2/NLGN1/FBXW8/TMEM106B/DHX36	17
BP	GO:0010921	regulation of phosphatase activity	31/1752	175/18670	0.000403685	0.00758824	0.00627423	RCAN1/MTOR/GSK3B/IGFBP3/ITGA1/PPP1R12A/PPP1R1A/PPP2R5E/EIF2AK2/PTN/ROCK1/TGFB2/PKMYT1/ROCK2/LMTK2/RRP1B/CEP192/KNL1/SLC39A10/CSRNP3/CSRNP2/PPP1R14C/PPP1R1B/PPP1R15B/MASTL/SPOCD1/PPP1R14A/SPRED1/NPNT/BOD1L1/TIPRL	31
BP	GO:0034504	protein localization to nucleus	42/1752	262/18670	0.000407288	0.00763142	0.00630993	ARNTL/BARD1/CCT6A/CDK1/COL1A1/CSE1L/ECT2/FLNA/GSK3B/KPNA2/TNPO1/LIF/NGFR/NUP98/PLK1/MED1/RANBP2/STAT3/TP53/TPR/WRN/XPO1/EIF2AK3/NUP155/NUP58/POM121/NUP153/IPO7/TNPO3/ARL2BP/POLR1A/IPO11/UBR5/GTSE1/RAB23/IPO9/PARP9/OSBPL8/LRRK2/DTX3L/PIKFYVE/POM121C	42
BP	GO:0060236	regulation of mitotic spindle organization	11/1752	37/18670	0.000412264	0.00767546	0.00634635	CLTC/PLK1/TPR/SMC1A/STAG1/TACC3/STAG2/TPX2/GPSM2/BORA/MAP9	11
BP	GO:1905314	semi-lunar valve development	11/1752	37/18670	0.000412264	0.00767546	0.00634635	JAG1/BMPR2/ELN/NOTCH2/RB1/ROBO1/ROBO2/ROCK1/SNAI2/TGFB2/ROCK2	11
BP	GO:0030203	glycosaminoglycan metabolic process	29/1752	160/18670	0.000413739	0.00767848	0.00634884	ARSB/BGN/CLTC/NCAN/CSPG4/EXT2/EXTL2/EXTL3/FMOD/GCNT2/GLB1/GNS/HMMR/HSPG2/LUM/SDC1/B4GALT5/HS2ST1/HS3ST3B1/GPC6/CHSY1/SLC35D1/CEMIP2/CHST11/CHPF2/CEMIP/HPSE2/XYLT1/DSEL	29
BP	GO:0050770	regulation of axonogenesis	32/1752	183/18670	0.000416337	0.00770224	0.00636849	APOE/BMPR2/CDH2/CDH4/DCC/EPHA4/FN1/GSK3B/MAG/MAP1B/NGFR/NRCAM/PLXNA1/PLXNA2/POU3F2/PTPRO/ROBO1/ROBO2/SHOX2/CNTN2/VEGFA/NRP1/SEMA5A/PLXNC1/ADNP/SIPA1L1/NIN/TNFRSF12A/SEMA6D/PLXNA4/WDR36/DRAXIN	32
BP	GO:1990138	neuron projection extension	30/1752	168/18670	0.000431592	0.00795926	0.00658101	APOE/BMPR2/CDH4/FN1/GSK3B/ITGA4/ITGB1/MAG/MAP1B/NRCAM/PLXNA1/AURKA/VCL/VEGFA/USP9X/IQGAP1/NRP2/NRP1/SEMA5A/POSTN/ADNP/FLRT3/TNFRSF12A/RAPH1/SEMA6D/SPG11/PLXNA4/WDR36/DRAXIN/EIF2AK4	30
BP	GO:0043405	regulation of MAP kinase activity	51/1752	337/18670	0.000434171	0.00798164	0.00659951	ALK/APOE/CAV1/CDK1/CSPG4/DUSP4/DUSP5/DUSP6/EGFR/EPHA4/EZH2/F2R/HMGCR/ITGA1/KRAS/MAP3K1/KITLG/PRKAA1/EIF2AK2/ROBO1/SFRP2/SHC1/TGFBR1/THBS1/TRAF6/VEGFA/PDE5A/ADAM9/IQGAP1/GDF15/RASGRP1/TENM1/SPRY1/SPRY2/TRIB2/PLCE1/CDK12/MAP3K20/KIDINS220/TAOK1/TRIB3/PDGFD/DUSP16/SPRY4/LRRK2/IQGAP3/SPRED1/ZNF675/SPRED2/TAB3/SPRED3	51
BP	GO:0043044	ATP-dependent chromatin remodeling	19/1752	88/18670	0.000438523	0.00801127	0.00662401	CENPA/CENPI/SMARCC1/OIP5/PSME4/RSF1/PBRM1/MIS18BP1/HJURP/CENPN/SMARCAD1/KNL1/CENPK/CENPH/CENPO/CENPU/CENPL/SPTY2D1/CENPW	19
BP	GO:0043470	regulation of carbohydrate catabolic process	19/1752	88/18670	0.000438523	0.00801127	0.00662401	HIF1A/NUP98/PRKAA1/RANBP2/STAT3/TP53/TPR/NCOR1/NUP155/NUP58/POM121/NUP153/NUP205/NUP160/ZBTB20/NUPR1/NDC1/TIGAR/POM121C	19
BP	GO:0010812	negative regulation of cell-substrate adhesion	16/1752	68/18670	0.000444048	0.00802903	0.00663869	JAG1/ANGPT2/COL1A1/GBP1/GCNT2/HOXA7/MMP14/SERPINE1/PTPRO/RASA1/THBS1/CASK/POSTN/FAM107A/ACER2/NEXMIF	16
BP	GO:0071230	cellular response to amino acid stimulus	16/1752	68/18670	0.000444048	0.00802903	0.00663869	ATP7A/COL1A1/COL1A2/COL3A1/COL4A1/COL5A2/DNMT1/EGFR/MTOR/MMP2/OPA1/PDGFD/CPEB4/SESN3/UBR1/CASTOR2	16
BP	GO:0051196	regulation of coenzyme metabolic process	20/1752	95/18670	0.000444848	0.00802903	0.00663869	HIF1A/NUP98/PDK3/PRKAA1/RANBP2/STAT3/TP53/TPR/NCOR1/NUP155/NUP58/POM121/NUP153/NUP205/NUP160/ZBTB20/NUPR1/NDC1/TIGAR/POM121C	20
BP	GO:0002504	antigen processing and presentation of peptide or polysaccharide antigen via MHC class II	21/1752	102/18670	0.000444989	0.00802903	0.00663869	AP1G1/CANX/CAPZA2/CENPE/CLTC/KIF2A/KIF11/THBS1/TRAF6/KIF23/SEC24C/SEC24D/SEC24B/SEC23A/SEC24A/KIF2C/SEC31A/KIF4A/RACGAP1/KIF15/KIF18A	21
BP	GO:0006986	response to unfolded protein	31/1752	176/18670	0.000446838	0.00803758	0.00664576	CCND1/BOK/CANX/SERPINH1/EIF2S1/EP300/EXTL2/EXTL3/GFPT1/HSPA2/EIF2AK2/SHC1/HSPA13/THBS1/EIF2AK3/PDIA6/HYOU1/HSPH1/KDELR3/HSPA4L/SEC31A/ATF6/UBXN4/FAF2/TOR1B/MBTPS2/TM7SF3/FKBP14/EDEM3/PPP1R15B/CREB3L1	31
BP	GO:0071824	protein-DNA complex subunit organization	45/1752	288/18670	0.000459052	0.00823195	0.00680647	ATRX/CENPA/CENPE/CENPF/CREB1/CENPI/HELLS/MCM2/MCM4/MCM6/RAD51/RB1/SMARCC1/TAF1/TCF4/TP53/KAT6A/CHAF1B/CDC45/CUL4B/PIAS1/GTF3C3/CHAF1A/SUPT16H/OIP5/PSME4/RSF1/PBRM1/MIS18BP1/HJURP/ASF1B/ATF7IP/BDP1/CAND1/CENPN/KNL1/CENPK/CENPH/CENPO/CENPU/CENPL/SPTY2D1/ARID2/SHPRH/CENPW	45
BP	GO:0035264	multicellular organism growth	27/1752	146/18670	0.000464325	0.00830105	0.00686361	ATRX/CDK4/CDKN1C/CREB1/EN1/EP300/MTOR/GPD2/HOXA5/PDE4D/PIK3CA/POU3F2/RARB/STIL/SOS1/STAT3/TP53/KDM6A/XRCC2/ATRN/GDF15/RAI1/NIPBL/SLC4A10/HEG1/RMI1/SH3PXD2B	27
BP	GO:1901214	regulation of neuron death	48/1752	313/18670	0.000466536	0.00831515	0.00687527	APOE/BOK/CASP2/CASP3/CBL/CREB1/DCC/EFNB2/EIF2S1/ELK1/EN1/F2R/MTOR/GSK3B/HIF1A/ITGA1/KRAS/MAG/MSH2/MYBL2/PIK3CA/PRKCI/PTPRZ1/RASA1/ROCK1/CCL3/SOD2/SRPK2/STAT3/TGFB2/TP53/XRCC2/FZD1/NRP1/CRLF1/KIF14/HYOU1/CHL1/GPR75/ADNP/NUPR1/SSH1/OXR1/TIGAR/CPEB4/LRRK2/DRAXIN/MIR125B1	48
BP	GO:0007043	cell-cell junction assembly	24/1752	124/18670	0.00047391	0.0084209	0.00696271	APC/CAV1/CDH2/CDH4/CDH6/CDH11/CTNND1/ACE/ECT2/EPHA2/GJB1/GJB2/AFDN/PRKCI/PKN2/PTPRO/ROCK1/SNAI2/VCL/DLG5/ROCK2/GJC1/HEG1/MTDH	24
BP	GO:0003281	ventricular septum development	17/1752	75/18670	0.000476045	0.00843321	0.00697288	BMPR2/LTBP1/PROX1/PTK7/ROBO1/ROBO2/SOX11/TBX5/TGFB2/TGFBR1/NSD2/LUZP1/FZD1/TRIP11/HECTD1/HEG1/CPLANE1	17
BP	GO:0006356	regulation of transcription by RNA polymerase I	10/1752	32/18670	0.000482455	0.00846977	0.00700311	FLNA/MTOR/MED1/TAF1/EIF2AK3/WDR43/NOL11/HEATR1/DHX33/UTP15	10
BP	GO:0071295	cellular response to vitamin	10/1752	32/18670	0.000482455	0.00846977	0.00700311	ATP2B1/COL1A1/TNC/MED1/PTN/SNAI2/TRIM24/POSTN/BRIP1/MIR125B1	10
BP	GO:1901976	regulation of cell cycle checkpoint	10/1752	32/18670	0.000482455	0.00846977	0.00700311	CCNB1/CRY1/MAD2L1/PROX1/TPR/NDC80/RFWD3/RINT1/WDR76/GEN1	10
BP	GO:0065004	protein-DNA complex assembly	40/1752	248/18670	0.000487033	0.00852454	0.0070484	ATRX/CENPA/CENPE/CENPF/CREB1/CENPI/HELLS/MCM2/MCM4/MCM6/RAD51/RB1/TAF1/TCF4/TP53/KAT6A/CHAF1B/CDC45/CUL4B/PIAS1/GTF3C3/CHAF1A/OIP5/RSF1/MIS18BP1/HJURP/ASF1B/ATF7IP/BDP1/CAND1/CENPN/KNL1/CENPK/CENPH/CENPO/CENPU/CENPL/SPTY2D1/SHPRH/CENPW	40
BP	GO:2001169	regulation of ATP biosynthetic process	20/1752	96/18670	0.000513182	0.00895542	0.00740466	AK4/HIF1A/NUP98/PRKAA1/RANBP2/STAT3/TP53/TPR/NCOR1/NUP155/NUP58/POM121/NUP153/NUP205/NUP160/ZBTB20/NUPR1/NDC1/TIGAR/POM121C	20
BP	GO:0010332	response to gamma radiation	14/1752	56/18670	0.000516802	0.00896506	0.00741264	ATR/BRCA2/CBL/ELK1/FANCD2/CXCL10/PRKAA1/PRKDC/TP53/WRN/XRCC2/XRCC5/MAP3K20/TIGAR	14
BP	GO:0051568	histone H3-K4 methylation	14/1752	56/18670	0.000516802	0.00896506	0.00741264	BRCA1/DNMT1/RBBP5/RLF/KDM6A/KMT2D/PAXIP1/RTF1/BCOR/PRMT6/ASH1L/KMT2E/KMT2C/TET3	14
BP	GO:0042326	negative regulation of phosphorylation	66/1752	468/18670	0.000523201	0.0090492	0.00748221	ADAR/APC/APOE/CASP3/CAV1/CBL/CCNB1/CDKN1C/CDKN2C/DAG1/DUSP4/DUSP5/DUSP6/FKTN/FOXM1/MTOR/GBP1/HMGCR/IGFBP3/INSM1/LIF/LRP6/PDE4D/PLK1/PKIB/PRKAR2B/PRKDC/PTPN13/RB1/SFRP2/STAT3/NR2F2/TIMP3/YWHAG/SOCS3/LATS1/NCOR1/SPRY1/SPRY2/IPO7/PPM1E/NNT/NUPR1/TRIB2/KIRREL1/CHRNA9/DBNDD2/ASH1L/PBK/TIGAR/HEG1/TRIB3/DUSP16/SPRY4/ITCH/PPP1R1B/PPP1R15B/UBASH3B/NIBAN1/LRRK2/SOCS4/SMCR8/SPRED1/ZNF675/SPRED2/SPRED3	66
BP	GO:0030166	proteoglycan biosynthetic process	16/1752	69/18670	0.000528481	0.00907226	0.00750127	BGN/BMPR2/NCAN/CSPG4/EXT2/EXTL2/EXTL3/HS2ST1/HS3ST3B1/CHSY1/SLC35D1/CHST11/CHPF2/XYLT1/DSEL/CANT1	16
BP	GO:0006352	DNA-templated transcription, initiation	40/1752	249/18670	0.000528836	0.00907226	0.00750127	CCND1/CCNB1/CDK1/CDK4/CREB1/E2F2/E2F3/GTF2I/NOTCH2/POLR2B/MED1/RARB/RORB/TAF1/TAF2/TBX5/TCF4/TEAD1/NR2E1/TP53/NR2C2/ZNF45/PPM1D/TAF1A/MED14/GTF3C4/GTF3C3/MED23/BCLAF1/MED13/PAXIP1/NCOA6/POLR1A/RSF1/ATF7IP/BDP1/CAND1/TFB2M/POLR1B/DHX36	40
BP	GO:0035303	regulation of dephosphorylation	35/1752	209/18670	0.000529885	0.00907226	0.00750127	RCAN1/MTOR/GSK3B/IGFBP3/ITGA1/PPP1R12A/PPP1R1A/PPP2R5E/EIF2AK2/PTBP1/PTN/ROCK1/TGFB2/IQGAP1/PKMYT1/ROCK2/LMTK2/RRP1B/SMG6/CEP192/KNL1/SLC39A10/CSRNP3/CSRNP2/PPP1R14C/PPP1R1B/PPP1R15B/MASTL/SPOCD1/PPP1R14A/CDCA2/SPRED1/NPNT/BOD1L1/TIPRL	35
BP	GO:0016572	histone phosphorylation	11/1752	38/18670	0.000531524	0.00907226	0.00750127	CCNA2/CCNB1/CDK1/CDK2/CHEK1/PRKAA1/AURKA/BAZ1B/AURKB/DCAF1/HASPIN	11
BP	GO:0010498	proteasomal protein catabolic process	67/1752	477/18670	0.000532293	0.00907226	0.00750127	APOE/ARNTL/BUB1B/CAV1/CCNB1/CCNF/CDK1/CDC20/CDK2/CSNK1A1/GSK3B/MAD2L1/PLK1/SEL1L/SKP2/SMARCC1/HSPA13/AURKA/TAF1/TMF1/UBE3A/TRIM25/CUL4B/CUL3/CUL1/ENC1/PIAS1/CDC23/AURKB/PTTG1/UBE4A/BAG5/CLOCK/RNF40/AREL1/KIF14/PLK2/UBE2C/UBXN4/FAF2/PSME4/LTN1/FBXO2/FBXO5/NUPR1/KLHL20/TRIB2/SENP1/ANKIB1/PBK/UGGT1/CCDC47/KLHL42/TRIB3/ANAPC1/MARCHF7/FBXL18/EDEM3/ITCH/SPSB4/TRIM9/LRRK2/SOCS4/UBXN2B/TMTC3/UBR1/RNF180	67
BP	GO:0007019	microtubule depolymerization	12/1752	44/18670	0.000547969	0.0093123	0.00769974	APC/KIF2A/MAP1B/MID1/CKAP5/KIF2C/CAMSAP2/CKAP2/TAOK1/KIF18A/KIF18B/KIF24	12
BP	GO:0060411	cardiac septum morphogenesis	17/1752	76/18670	0.00056043	0.00943663	0.00780255	JAG1/BMPR2/NOTCH2/PROX1/RARB/ROBO1/ROBO2/SOX11/TBX5/TGFB2/TGFBR1/TP53/NSD2/FZD1/NRP2/NRP1/PARVA	17
BP	GO:1903829	positive regulation of cellular protein localization	49/1752	324/18670	0.000564895	0.00943663	0.00780255	APC/BICD1/CCT6A/CDK1/E2F1/ECT2/EGFR/EPHA2/EPB41/EPHA3/FLNA/GSK3B/ITGA3/ITGB1/LIF/MSN/NGFR/PLK1/PRKAA1/PRKCI/PTN/PTPN9/TP53/TPR/YWHAG/IQGAP1/EIF2AK3/ROCK2/KIF20B/TCAF1/TM9SF4/TENM1/NDC80/MTCL1/ICE1/NIPBL/GPSM2/SH3GLB1/UBR5/CTDSPL2/GTSE1/SSH1/GNL3L/CCDC88A/CEMIP/XPO4/WNK3/PARP9/DTX3L	49
BP	GO:1902115	regulation of organelle assembly	33/1752	194/18670	0.000567842	0.00943663	0.00780255	BRCA1/GAP43/IL1RAP/MSN/PLK1/PRKAA1/PROX1/SDC1/STIL/TPR/ALMS1/SMC1A/CEP135/G3BP2/STAG1/SPAG5/PLK4/STAG2/PLK2/CNOT1/SYNE2/RAB3GAP2/NUPR1/GPSM2/ASAP1/SH3GLB1/MNS1/CCDC88A/TBC1D14/CEP295/LRRK2/SMCR8/PIKFYVE	33
BP	GO:0006312	mitotic recombination	8/1752	22/18670	0.0005682	0.00943663	0.00780255	BRCA2/ERCC4/MSH3/RAD51/RAD50/SMC5/SMC6/GEN1	8
BP	GO:0022010	central nervous system myelination	8/1752	22/18670	0.0005682	0.00943663	0.00780255	ASPA/MYRF/MAG/PLP1/CNTN2/B4GALT5/FA2H/NKX6-2	8
BP	GO:0032291	axon ensheathment in central nervous system	8/1752	22/18670	0.0005682	0.00943663	0.00780255	ASPA/MYRF/MAG/PLP1/CNTN2/B4GALT5/FA2H/NKX6-2	8
BP	GO:0036119	response to platelet-derived growth factor	8/1752	22/18670	0.0005682	0.00943663	0.00780255	ATP7A/CBL/CCNA2/CREB1/FER/PTN/IQGAP1/PDGFD	8
BP	GO:0045943	positive regulation of transcription by RNA polymerase I	8/1752	22/18670	0.0005682	0.00943663	0.00780255	MTOR/TAF1/EIF2AK3/WDR43/NOL11/HEATR1/DHX33/UTP15	8
BP	GO:0035305	negative regulation of dephosphorylation	22/1752	111/18670	0.000571789	0.00946934	0.0078296	GSK3B/PPP1R1A/PTN/ROCK1/TGFB2/IQGAP1/PKMYT1/ROCK2/LMTK2/RRP1B/CEP192/KNL1/CSRNP3/CSRNP2/PPP1R14C/PPP1R1B/MASTL/SPOCD1/PPP1R14A/SPRED1/BOD1L1/TIPRL	22
BP	GO:0007163	establishment or maintenance of cell polarity	35/1752	210/18670	0.000579712	0.00957344	0.00791567	RND3/KRIT1/CENPA/GSK3B/MAD2L1/MAP1B/MSN/PLK1/PRKCI/PTK7/ROCK1/WEE1/LIN7A/ZW10/DLG5/ROCK2/KIF20B/CKAP5/ACTR3/ACTR2/SPRY1/SPRY2/NDC80/CAP2/ARFGEF1/KIF2C/SIPA1L3/MTCL1/CLIC4/GPSM2/KIF26B/PARVA/RHOJ/DOCK7/UBXN2B	35
BP	GO:0010923	negative regulation of phosphatase activity	21/1752	104/18670	0.000583961	0.00961644	0.00795122	GSK3B/PPP1R1A/PTN/ROCK1/TGFB2/PKMYT1/ROCK2/LMTK2/RRP1B/CEP192/KNL1/CSRNP3/CSRNP2/PPP1R14C/PPP1R1B/MASTL/SPOCD1/PPP1R14A/SPRED1/BOD1L1/TIPRL	21
BP	GO:0045216	cell-cell junction organization	28/1752	156/18670	0.00060593	0.00995019	0.00822718	APC/CAV1/CDH2/CDH4/CDH6/CDH11/CTNND1/ACE/ECT2/EPHA2/F2R/GJB1/GJB2/AFDN/PRKCI/PKN2/PTPRO/ROCK1/SNAI2/TGFB2/TGFBR1/VCL/DLG5/ROCK2/GJC1/HEG1/NLGN4X/MTDH	28
BP	GO:0007029	endoplasmic reticulum organization	14/1752	57/18670	0.000626715	0.0102627	0.00848555	LMAN1/EIF2AK3/TRAM2/DOP1B/SEC31A/RAB3GAP2/TOR1B/SEC61A1/CCDC47/ATL2/REEP1/LNPK/LRRK2/MIA3	14
BP	GO:1901653	cellular response to peptide	56/1752	385/18670	0.000636528	0.0103942	0.00859434	ADCY7/APC/ATP2B1/CAV1/CCNA2/CDC6/CDK4/CREB1/EPHA4/EPRS1/FER/GJB2/GRB10/GRM5/GSK3B/ITGA4/MAP1B/MYO5A/NGFR/OPA1/PIK3CA/PPAT/PRKAA1/PRKAR2B/PRKCI/PRKDC/ROCK1/RPS6KB1/SHC1/SMARCC1/SOS1/SRD5A1/STAT1/STAT3/KLF10/TP53/YWHAG/PIK3R3/USO1/TIMELESS/SOCS3/ROCK2/GDF15/LPIN2/HDAC9/NAMPT/RAB31/KLF3/RAB8B/PHIP/DENND4C/TRIB3/BRIP1/OSBPL8/SOGA1/SESN3	56
BP	GO:0031109	microtubule polymerization or depolymerization	22/1752	112/18670	0.000649656	0.0105241	0.00870169	APC/KIF2A/MAP1B/MET/MID1/CLIP1/CKAP5/AKAP9/TUBB4A/KIF2C/CAMSAP2/FBXO5/CKAP2/NIN/CEP192/TAOK1/SLAIN2/KIF18A/KIF18B/SKA1/SKA3/KIF24	22
BP	GO:0000722	telomere maintenance via recombination	6/1752	13/18670	0.000649879	0.0105241	0.00870169	BRCA2/ERCC4/RAD51/RAD50/SMC5/SMC6	6
BP	GO:1902285	semaphorin-plexin signaling pathway involved in neuron projection guidance	6/1752	13/18670	0.000649879	0.0105241	0.00870169	PLXNA1/PLXNA2/NRP2/NRP1/PLXNC1/PLXNA4	6
BP	GO:0019827	stem cell population maintenance	28/1752	157/18670	0.000672759	0.0108645	0.00898316	JAG1/BCL9/CDH2/FANCC/FANCD2/LIF/LOXL2/NOTCH2/POLR2B/PROX1/PTN/STAT3/KLF10/NR2E1/NCOA3/SMC1A/MED14/MMP24/CNOT1/ZC3H13/RTF1/NIPBL/RIF1/CDC73/ZNF322/LBH/ASPM/BCL9L	28
BP	GO:0019886	antigen processing and presentation of exogenous peptide antigen via MHC class II	20/1752	98/18670	0.000677546	0.0108817	0.00899737	AP1G1/CANX/CAPZA2/CENPE/CLTC/KIF2A/KIF11/TRAF6/KIF23/SEC24C/SEC24D/SEC24B/SEC23A/SEC24A/KIF2C/SEC31A/KIF4A/RACGAP1/KIF15/KIF18A	20
BP	GO:0099175	regulation of postsynapse organization	20/1752	98/18670	0.000677546	0.0108817	0.00899737	APOE/CDH2/EPHA4/GAP43/IL1RAP/CAPRIN1/NRCAM/OPA1/PTN/UBE3A/LRP8/NRP2/HOMER1/ACTR2/NLGN1/ARC/SIPA1L1/SSH1/LRRK2/DHX36	20
BP	GO:0071897	DNA biosynthetic process	33/1752	196/18670	0.000683383	0.0109454	0.00905002	PARP4/ATR/BMPR2/CCT6A/CENPF/LOX/NEK2/PCNA/POLA1/POLH/PKIB/REV3L/RFC3/TK1/TP53/TYMS/WRN/XRCC5/TRIM25/TNKS/AURKB/PCLAF/RAD50/POLD3/SMG6/PARM1/POT1/POLK/DTL/GNL3L/DSCC1/DCP2/LIN9	33
BP	GO:0010256	endomembrane system organization	62/1752	438/18670	0.000690456	0.0110284	0.00911871	ABCD2/ATP2A2/MYRF/CAV1/CCNB1/CDK1/LYST/COL5A1/CREB1/CSNK1A1/F2R/LMAN1/MYH10/PLK1/PLSCR1/TGFB2/TMF1/UGCG/USO1/SYNJ1/WASL/USP8/CCNB2/ZW10/TRIP11/EIF2AK3/BAG5/NUP155/TRAM2/DOP1B/AKAP9/ARFGEF2/ARFGEF1/NEK6/SEC31A/CAMSAP2/DNAJC13/WASHC4/LEMD3/RAB3GAP2/FBXW8/MYOF/TOR1B/SEC61A1/ASAP1/TMED5/SH3GLB1/STX17/CCDC47/KNL1/PARP11/ALS2/TRAPPC11/ATL2/REEP1/FA2H/LNPK/FCHO2/LRRK2/UBXN2B/ANO6/MIA3	62
BP	GO:1903322	positive regulation of protein modification by small protein conjugation or removal	25/1752	135/18670	0.000724479	0.0115403	0.00954197	BRCA1/CAV1/CDC20/CRY1/PLK1/SEPTIN4/SKP2/TRAF6/UBE3A/CUL3/PIAS1/RNF40/MALT1/UBE2C/FAM107A/PAXIP1/RNF111/FANCI/ARRDC3/TRIB3/MARCHF7/MASTL/SPSB4/LRRK2/RNF180	25
BP	GO:0031440	regulation of mRNA 3'-end processing	9/1752	28/18670	0.000732227	0.0116321	0.0096178	BARD1/CCNB1/CCNT1/NCBP1/RNF40/NUDT21/CDC73/ZC3H14/DHX36	9
BP	GO:0035904	aorta development	14/1752	58/18670	0.000755807	0.0119741	0.00990062	JAG1/COL3A1/EFNB2/LOX/LTBP1/MYH10/PKD2/PROX1/ROBO1/ROBO2/TGFB2/SEC24B/ADAMTS6/HECTD1	14
BP	GO:0045666	positive regulation of neuron differentiation	54/1752	371/18670	0.000774982	0.0122447	0.0101244	ALK/APOE/ARSB/BMPR2/CDH4/CNR1/ECT2/EP300/EPHA3/EPHA4/ETV5/EZH2/FN1/MTOR/ITGA3/CAPRIN1/MAP1B/NGFR/NRCAM/OPA1/PLXNA1/PLXNA2/PRKCI/MAPK6/PROX1/PTK7/TWF1/PTN/RARB/ROBO1/ROBO2/SHOX2/SOX11/TCF4/TCF12/VEGFA/LRP8/FZD1/IQGAP1/NRP1/SEMA5A/DLG5/ACTR2/PLXNC1/NLGN1/ADNP/FBXW8/NIN/TNFRSF12A/TMEM106B/KIDINS220/PLXNA4/DHX36/TRIM67	54
BP	GO:0050772	positive regulation of axonogenesis	18/1752	85/18670	0.000782366	0.0123281	0.0101933	BMPR2/CDH4/FN1/MAP1B/NGFR/PLXNA1/PLXNA2/ROBO1/ROBO2/SHOX2/VEGFA/NRP1/SEMA5A/PLXNC1/ADNP/NIN/TNFRSF12A/PLXNA4	18
BP	GO:0060977	coronary vasculature morphogenesis	7/1752	18/18670	0.000794426	0.0124727	0.0103129	TBX5/TGFBR1/VEGFA/NRP1/SEC24B/SPRED1/ARID2	7
BP	GO:0048675	axon extension	23/1752	121/18670	0.000799711	0.0124727	0.0103129	APOE/BMPR2/CDH4/FN1/GSK3B/ITGB1/MAG/MAP1B/NRCAM/VCL/VEGFA/USP9X/NRP2/NRP1/SEMA5A/ADNP/TNFRSF12A/RAPH1/SEMA6D/SPG11/PLXNA4/WDR36/DRAXIN	23
BP	GO:0007413	axonal fasciculation	8/1752	23/18670	0.000800081	0.0124727	0.0103129	CASP3/CNR1/EPHA3/EPHA4/NRCAM/CNTN2/NRP1/SEMA5A	8
BP	GO:0106030	neuron projection fasciculation	8/1752	23/18670	0.000800081	0.0124727	0.0103129	CASP3/CNR1/EPHA3/EPHA4/NRCAM/CNTN2/NRP1/SEMA5A	8
BP	GO:0043254	regulation of protein complex assembly	65/1752	467/18670	0.000813833	0.0126534	0.0104623	ADD2/APOE/ATR/CAPZA2/CREB1/DDX3X/ELN/EP300/EPS8/ERCC4/FER/MTOR/GFAP/GSK3B/INSM1/MAP1B/MET/MSN/PRKAA1/EIF2AK2/TWF1/RASA1/RB1/CLIP1/TAF1/TP53/VEGFA/CUL4B/WASL/LATS1/BCLAF1/G3BP2/KIF14/ACTR3/ACTR2/AKAP9/TENM1/TUBB4A/SEC24B/ARFGEF1/NCKAP1/IQGAP2/TMSB15A/PAXIP1/CNOT1/CAMSAP2/ICE1/ASAP1/SH3GLB1/NIN/FBLIM1/KIRREL1/HJURP/ATF7IP/CAND1/DHX33/CRACD/SLAIN2/PLEKHG2/BBS10/FHOD3/ARHGAP18/TRIM9/MTPN/DHX36	65
BP	GO:0031099	regeneration	33/1752	198/18670	0.000819125	0.0127019	0.0105024	ANGPT2/ANXA1/CCND1/BCL9/CCNA2/CCNB1/CDK1/CDK4/DAG1/DHFR/EGFR/EPHA4/EZH2/GAP43/TNC/IGF2R/MAG/MAP1B/PCNA/MED1/PPAT/KLK6/PTGFRN/PTN/PTPN12/AURKA/TYMS/NREP/POSTN/WDR35/MTPN/DHFRP1/MIR590	33
BP	GO:0006026	aminoglycan catabolic process	15/1752	65/18670	0.000823539	0.0127029	0.0105032	ARSB/BGN/NCAN/CSPG4/FMOD/GLB1/GNS/HMMR/HSPG2/LUM/SDC1/GPC6/CEMIP2/CEMIP/HPSE2	15
BP	GO:0070192	chromosome organization involved in meiotic cell cycle	15/1752	65/18670	0.000823539	0.0127029	0.0105032	ATRX/BUB1/BUB1B/FANCD2/RAD51/TRIP13/NCAPD2/SMC4/RAD50/SMC2/NCAPD3/NCAPH/NDC1/BRIP1/SGO2	15
BP	GO:0003206	cardiac chamber morphogenesis	24/1752	129/18670	0.000855684	0.0131518	0.0108744	JAG1/BMPR2/HIF1A/MYL3/NOTCH2/MED1/PROX1/RARB/ROBO1/ROBO2/SFRP2/SHOX2/SOS1/SOX11/TBX5/TGFB2/TGFBR1/TP53/NSD2/FZD1/NRP2/NRP1/PARVA/HEG1	24
BP	GO:0008156	negative regulation of DNA replication	11/1752	40/18670	0.000857138	0.0131518	0.0108744	ATR/BRCA2/CDC6/MSH6/MSH3/TP53/SMC1A/TIMELESS/STAG2/PDS5A/FBXO5	11
BP	GO:0007409	axonogenesis	65/1752	468/18670	0.000860709	0.013172	0.0108911	APOE/BMPR2/CDH2/CDH4/CDH11/CREB1/DAG1/DCC/EFNB2/EPHA2/EPHA3/EPHA4/ETV1/FN1/GAP43/GRB10/GSK3B/ITGA4/ITGB1/LAMA2/MAG/MAP1B/MYH10/NGFR/NRCAM/PIK3CA/PLXNA1/PLXNA2/POU3F2/PTPRO/PTPRZ1/ROBO1/ROBO2/SHC1/SHOX2/SOS1/CNTN2/NR2E1/TRIO/VCL/VEGFA/USP9X/NRP2/NRP1/SEMA5A/B4GALT5/PLPPR4/PLXNC1/CHL1/USP33/ADNP/FLRT3/SIPA1L1/NIN/TNFRSF12A/SHC3/ALS2/RAPH1/SEMA6D/SPG11/DOCK7/PLXNA4/BOC/WDR36/DRAXIN	65
BP	GO:0051402	neuron apoptotic process	38/1752	239/18670	0.000876687	0.0133815	0.0110643	APAF1/APOE/BOK/CASP2/CASP3/EN1/F2R/HIF1A/ITGA1/KRAS/MAG/MSH2/MYBL2/NGFR/PIK3CA/PRKCI/PTPRZ1/RASA1/RB1/ROCK1/SCN2A/CCL3/SOD2/SRPK2/TGFB2/TP53/XRCC2/NRP1/CRLF1/KIF14/HYOU1/CHL1/ADNP/NUPR1/OXR1/CPEB4/DRAXIN/MIR125B1	38
BP	GO:0006333	chromatin assembly or disassembly	32/1752	191/18670	0.000890016	0.0135496	0.0112033	ATRX/CENPA/CENPI/HELLS/MCM2/SMARCC1/TP53/TPR/KAT6A/CHAF1B/BAZ1B/TLK1/CHAF1A/SUPT16H/OIP5/SMCHD1/RSF1/PBRM1/MIS18BP1/HJURP/ASF1B/CENPN/KNL1/CENPK/CENPH/CENPO/CENPU/CENPL/SPTY2D1/ARID2/SHPRH/CENPW	32
BP	GO:0003151	outflow tract morphogenesis	17/1752	79/18670	0.000894784	0.0135619	0.0112135	JAG1/BMPR2/ELN/HIF1A/RARB/ROBO1/ROBO2/SFRP2/SOX11/TGFB2/VEGFA/FZD1/NRP2/NRP1/SEC24B/NIPBL/PARVA	17
BP	GO:0035966	response to topologically incorrect protein	33/1752	199/18670	0.000895466	0.0135619	0.0112135	CCND1/BOK/CANX/SERPINH1/EIF2S1/EP300/EXTL2/EXTL3/GFPT1/HSPA2/EIF2AK2/SHC1/HSPA13/THBS1/CUL3/EIF2AK3/PDIA6/HYOU1/HSPH1/KDELR3/HSPA4L/SEC31A/ATF6/UBXN4/FAF2/TOR1B/MBTPS2/TM7SF3/FKBP14/UGGT1/EDEM3/PPP1R15B/CREB3L1	33
BP	GO:0032092	positive regulation of protein binding	19/1752	93/18670	0.000900177	0.013598	0.0112433	ADD2/APOE/CAV1/ACE/EP300/EPB41/EPHA4/GSK3B/MMP9/TAF1/NRP1/PLK2/USP33/GNL3L/EPB41L5/TRIB3/CTHRC1/LRRK2/DTX3L	19
BP	GO:0097193	intrinsic apoptotic signaling pathway	44/1752	289/18670	0.000914187	0.0137537	0.0113721	APAF1/BOK/BRCA1/BRCA2/CASP2/CASP3/CAV1/DDX3X/E2F1/E2F2/EPHA2/EP300/MSH6/HIF1A/ITPR1/MMP9/MSH2/OPA1/PLAGL2/SEPTIN4/PRKDC/SCN2A/SFRP2/SNAI2/SOD2/TP53/CUL3/CUL1/EIF2AK3/BAG5/BCLAF1/MELK/HYOU1/NUPR1/RRM2B/TRIB3/EDA2R/FIGNL1/AEN/MARCHF7/CREB3L1/LRRK2/RTKN2/DDIAS	44
BP	GO:0009101	glycoprotein biosynthetic process	51/1752	348/18670	0.00091519	0.0137537	0.0113721	ATP7A/BGN/BMPR2/NCAN/CSPG4/DDOST/EXT2/EXTL2/EXTL3/FKTN/GALNT2/GCNT2/GFPT1/STT3A/LMAN1/RPN2/SOAT1/TUSC3/B3GALT1/TRIP11/B4GALT5/HS2ST1/HS3ST3B1/ARFGEF1/MAN1A2/CHSY1/SLC35D1/DPY19L1/POFUT1/ST8SIA5/CHST11/CHPF2/GALNT10/UGGT1/XYLT1/POGLUT2/EDEM3/POMK/ST6GAL2/MCFD2/DSEL/CANT1/POGLUT3/ALG10B/B3GALNT2/XXYLT1/TMTC3/TET3/ACER2/DPY19L2P2/ALG11	51
BP	GO:0000132	establishment of mitotic spindle orientation	9/1752	29/18670	0.000974179	0.0145743	0.0120505	CENPA/MAD2L1/PLK1/ZW10/SPRY1/SPRY2/NDC80/GPSM2/UBXN2B	9
BP	GO:0006513	protein monoubiquitination	15/1752	66/18670	0.000974775	0.0145743	0.0120505	CBL/RNF2/TRIM25/CUL4B/CUL3/CUL1/RNF40/UBE2T/UHRF1/DTL/BCOR/RAD18/KLHL12/CDC73/DTX3L	15
BP	GO:0042063	gliogenesis	44/1752	290/18670	0.000982129	0.0146468	0.0121105	ANXA1/ASPA/BOK/MYRF/CDK1/CDH2/CDK6/CDKN2C/CREB1/CSPG4/DAG1/E2F1/EGFR/EPHA4/ETV5/EZH2/MTOR/GAP43/KRAS/LAMA2/LAMB1/LIF/MAG/MMP14/P2RY1/PLP1/POU3F2/PRKCI/PTN/PTPRZ1/CCL3/SOX11/STAT3/CNTN2/TGFB2/NR2E1/B4GALT5/MMP24/SYNE2/GJC2/FA2H/NKX6-2/SLC45A3/MIR125B1	44
BP	GO:0033673	negative regulation of kinase activity	40/1752	257/18670	0.000995223	0.0148043	0.0122407	ADAR/APC/APOE/CASP3/CAV1/CBL/CDKN1C/CDKN2C/DUSP4/DUSP5/DUSP6/HMGCR/LRP6/PLK1/PKIB/PRKAR2B/RB1/SFRP2/NR2F2/YWHAG/SOCS3/LATS1/SPRY1/SPRY2/IPO7/PPM1E/TRIB2/DBNDD2/HEG1/TRIB3/DUSP16/SPRY4/PPP1R1B/UBASH3B/SOCS4/SMCR8/SPRED1/ZNF675/SPRED2/SPRED3	40
BP	GO:0002495	antigen processing and presentation of peptide antigen via MHC class II	20/1752	101/18670	0.00100855	0.0149645	0.0123732	AP1G1/CANX/CAPZA2/CENPE/CLTC/KIF2A/KIF11/TRAF6/KIF23/SEC24C/SEC24D/SEC24B/SEC23A/SEC24A/KIF2C/SEC31A/KIF4A/RACGAP1/KIF15/KIF18A	20
BP	GO:0016358	dendrite development	37/1752	233/18670	0.00104095	0.0153829	0.0127192	ALK/APOE/CDC20/DCC/EPHA4/EZH2/MTOR/GSK3B/ITGB1/CAPRIN1/MAP1B/MARK1/OPA1/MAPK6/PTN/NR2E1/UBE3A/LRP8/IQGAP1/NRP1/WASL/DLG5/ACTR2/PLK2/LZTS1/NLGN1/ARC/CAMSAP2/RBFOX2/SIPA1L1/FBXW8/ASAP1/TMEM106B/KIDINS220/LRRK2/SEZ6/DHX36	37
BP	GO:0043161	proteasome-mediated ubiquitin-dependent protein catabolic process	59/1752	419/18670	0.00104393	0.0153829	0.0127192	ARNTL/BUB1B/CAV1/CCNB1/CCNF/CDK1/CDC20/CDK2/CSNK1A1/GSK3B/MAD2L1/PLK1/SEL1L/SKP2/SMARCC1/HSPA13/AURKA/TAF1/UBE3A/TRIM25/CUL4B/CUL3/CUL1/PIAS1/CDC23/AURKB/PTTG1/UBE4A/BAG5/CLOCK/AREL1/KIF14/PLK2/UBE2C/UBXN4/FAF2/PSME4/LTN1/FBXO2/FBXO5/KLHL20/TRIB2/SENP1/ANKIB1/PBK/CCDC47/KLHL42/TRIB3/ANAPC1/FBXL18/EDEM3/ITCH/SPSB4/TRIM9/LRRK2/SOCS4/UBXN2B/UBR1/RNF180	59
BP	GO:0006268	DNA unwinding involved in DNA replication	6/1752	14/18670	0.00104728	0.0153829	0.0127192	MCM2/MCM4/MCM6/RAD51/RECQL/WRN	6
BP	GO:0007100	mitotic centrosome separation	6/1752	14/18670	0.00104728	0.0153829	0.0127192	CHEK1/KIF11/NEK2/AURKA/MAP9/UBXN2B	6
BP	GO:1902275	regulation of chromatin organization	31/1752	185/18670	0.00105849	0.0155086	0.0128231	ATRX/BRCA1/CAMK2D/CCNB1/CHEK1/DNMT1/LIF/MKI67/KDM5A/SNAI2/TP53/TPR/VEGFA/CDC45/TRIP12/RNF40/TLK1/PAXIP1/RTF1/NIPBL/ATAD2/UBR5/BCOR/PRMT6/RIF1/RESF1/ATF7IP/KMT2E/NSD1/LRRK2/SPTY2D1	31
BP	GO:0071229	cellular response to acid chemical	34/1752	209/18670	0.00106531	0.0155695	0.0128734	ACACA/ATP7A/CCNB1/CDK4/COL1A1/COL1A2/COL3A1/COL4A1/COL5A2/CREB1/DNMT1/E2F1/EGFR/EPHA3/MTOR/TNC/KDR/MMP2/OPA1/PDK3/PKD2/PRKAA1/PTK7/RARB/RORB/VEGFA/XRCC5/ADNP2/GNG2/PDGFD/CPEB4/SESN3/UBR1/CASTOR2	34
BP	GO:0045005	DNA-dependent DNA replication maintenance of fidelity	11/1752	41/18670	0.00107336	0.0156481	0.0129384	ATRX/BRCA2/MSH3/PCNA/RAD51/WRN/TIMELESS/RFWD3/EME1/BOD1L1/GEN1	11
BP	GO:0046794	transport of virus	14/1752	60/18670	0.00108206	0.0157357	0.0130108	CAV1/KPNA2/NUP98/RANBP2/TPR/XPO1/NUP155/NUP58/POM121/NUP153/NUP205/NUP160/NDC1/POM121C	14
BP	GO:0010770	positive regulation of cell morphogenesis involved in differentiation	27/1752	154/18670	0.00108511	0.0157409	0.0130151	BMPR2/CDH4/EPHA4/FLNA/FN1/CAPRIN1/MAP1B/NEDD9/NGFR/OPA1/PLXNA1/PLXNA2/ROBO1/ROBO2/SHOX2/VEGFA/LRP8/NRP1/SEMA5A/ACTR2/PLXNC1/ADNP/FBXW8/NIN/TNFRSF12A/PLXNA4/DHX36	27
BP	GO:0051261	protein depolymerization	21/1752	109/18670	0.00110618	0.0160067	0.0132349	ADD2/APC/CAPZA2/EPS8/KIF2A/MAP1B/MID1/TWF1/SYNJ1/SEMA5A/CKAP5/KIF2C/CAMSAP2/CKAP2/LIMA1/CRACD/TAOK1/KIF18A/MTPN/KIF18B/KIF24	21
BP	GO:0014013	regulation of gliogenesis	23/1752	124/18670	0.00113247	0.0163277	0.0135003	ASPA/CDK1/CDH2/CREB1/DAG1/E2F1/EPHA4/ETV5/EZH2/MTOR/LIF/MAG/PRKCI/PTN/PTPRZ1/CCL3/SOX11/CNTN2/NR2E1/GJC2/NKX6-2/SLC45A3/MIR125B1	23
BP	GO:0006022	aminoglycan metabolic process	29/1752	170/18670	0.00113395	0.0163277	0.0135003	ARSB/BGN/CLTC/NCAN/CSPG4/EXT2/EXTL2/EXTL3/FMOD/GCNT2/GLB1/GNS/HMMR/HSPG2/LUM/SDC1/B4GALT5/HS2ST1/HS3ST3B1/GPC6/CHSY1/SLC35D1/CEMIP2/CHST11/CHPF2/CEMIP/HPSE2/XYLT1/DSEL	29
BP	GO:0043523	regulation of neuron apoptotic process	34/1752	210/18670	0.00115912	0.0166492	0.0137661	APOE/BOK/CASP2/CASP3/EN1/F2R/HIF1A/ITGA1/KRAS/MAG/MSH2/MYBL2/PIK3CA/PRKCI/PTPRZ1/RASA1/ROCK1/CCL3/SOD2/SRPK2/TGFB2/TP53/XRCC2/NRP1/CRLF1/KIF14/HYOU1/CHL1/ADNP/NUPR1/OXR1/CPEB4/DRAXIN/MIR125B1	34
BP	GO:0051168	nuclear export	32/1752	194/18670	0.0011631	0.0166655	0.0137796	BARD1/CSE1L/DHX9/GSK3B/NCBP1/NUP98/RANBP2/ABCE1/TP53/TPR/XPO1/NUP155/NUP58/POM121/NUP153/MALT1/XPOT/SMG1/NUP205/NUP160/SMG6/CDC40/CTDSPL2/GTSE1/SDAD1/NDC1/XPO5/XPO4/DUSP16/FYTTD1/UHMK1/POM121C	32
BP	GO:0031670	cellular response to nutrient	16/1752	74/18670	0.0011871	0.0169677	0.0140295	ATP2B1/COL1A1/TNC/OPA1/P2RY1/MED1/PTN/SNAI2/TAF1/TNKS/TRIM24/POSTN/SSH1/BRIP1/MIR125B1/CASTOR2	16
BP	GO:0106027	neuron projection organization	18/1752	88/18670	0.00119702	0.0170678	0.0141123	ABCD2/APOE/EPHA4/GSK3B/ITGA3/CAPRIN1/OPA1/UBE3A/LRP8/WASL/HOMER1/ACTR2/NLGN1/ARC/SIPA1L1/TANC1/LRRK2/DHX36	18
BP	GO:0033483	gas homeostasis	5/1752	10/18670	0.001218	0.0172662	0.0142763	CAV1/HIF1A/SOD2/ADNP/NNT	5
BP	GO:0051255	spindle midzone assembly	5/1752	10/18670	0.001218	0.0172662	0.0142763	AURKB/KIF23/KIF4A/RACGAP1/MAP10	5
BP	GO:0046777	protein autophosphorylation	37/1752	235/18670	0.0012198	0.0172662	0.0142763	ALK/ATR/CAMK2D/CAV1/ACE/EGFR/EIF2S1/EPHA4/FER/MTOR/GSK3B/KDR/NEK2/PPP2R5E/EIF2AK2/AURKA/TAF1/TTK/VEGFA/TRIM24/IQGAP1/AURKB/EIF2AK3/MELK/RAD50/NEK6/LMTK2/SMG1/CDK12/TRPM7/TAOK1/WNK3/PEAK1/PDGFD/LRRK2/UHMK1/EIF2AK4	37
BP	GO:0099173	postsynapse organization	28/1752	163/18670	0.00122594	0.0173112	0.0143135	ACTN1/APOE/CDH2/EPHA4/ETV5/GAP43/IL1RAP/ITGA3/CAPRIN1/MYH10/NRCAM/OPA1/PTN/UBE3A/LRP8/NRP2/NRP1/WASL/HOMER1/ACTR2/NLGN1/ARC/SIPA1L1/SSH1/NLGN4X/TANC1/LRRK2/DHX36	28
BP	GO:0032535	regulation of cellular component size	53/1752	370/18670	0.00124462	0.0175327	0.0144966	ADD2/APOE/ATP7A/BMPR2/CAPZA2/CDH4/CDK4/CREB1/DCC/ELN/EPS8/FER/FN1/MTOR/GSK3B/MAG/MAP1B/MSN/NRCAM/TWF1/RASA1/CNTN2/VEGFA/NRP1/WASL/SEMA5A/LATS1/SLC12A6/USH1C/ACTR3/ACTR2/TENM1/VAV3/ARFGEF1/NCKAP1/IQGAP2/TMSB15A/ADNP/TNFRSF12A/LIMA1/KIRREL1/CRACD/ALS2/PLEKHG2/SEMA6D/FHOD3/PLXNA4/ARHGAP18/IQGAP3/WDR36/MTPN/ANO6/DRAXIN	53
BP	GO:0006611	protein export from nucleus	30/1752	179/18670	0.00125922	0.0176532	0.0145963	BARD1/CSE1L/GSK3B/NCBP1/NUP98/RANBP2/ABCE1/TP53/TPR/XPO1/NUP155/NUP58/POM121/NUP153/XPOT/SMG1/NUP205/NUP160/SMG6/CDC40/CTDSPL2/GTSE1/SDAD1/NDC1/XPO5/XPO4/DUSP16/FYTTD1/UHMK1/POM121C	30
BP	GO:0048771	tissue remodeling	30/1752	179/18670	0.00125922	0.0176532	0.0145963	JAG1/ANXA1/ATP7A/BGN/BMPR2/CAV1/CSPG4/ACE/EGFR/EPHA2/F2R/HIF1A/IGFBP5/LIF/LRP6/MMP2/MMP14/NOTCH2/TNFRSF11B/PTN/ROCK1/TFRC/TIMP1/TP53/TRAF6/ROCK2/SUCO/UBASH3B/CTHRC1/ZNF675	30
BP	GO:0002063	chondrocyte development	12/1752	48/18670	0.00127295	0.017803	0.0147201	BMPR2/SERPINH1/COL6A2/COL12A1/SFRP2/SHOX2/COL14A1/EIF2AK3/CHSY1/POC1A/CHST11/MEX3C	12
BP	GO:0003209	cardiac atrium morphogenesis	9/1752	30/18670	0.00127706	0.0178179	0.0147325	BMPR2/NOTCH2/PROX1/SHOX2/SOS1/TBX5/TGFB2/NSD2/HEG1	9
BP	GO:0001654	eye development	52/1752	362/18670	0.00129216	0.0179856	0.0148712	JAG1/SHROOM2/ATP2B1/ATP2B4/BMPR2/CASP2/CDK4/CDKN1C/COL4A1/COL5A1/COL5A2/COL8A1/EGFR/EPHA2/GPD2/HIF1A/LRP6/MYH10/OPA1/MED1/PRKCI/PROX1/PTN/RARB/RORB/RRM1/SOS1/SOX11/SP3/STAT3/TGFB2/TGFBR1/NR2E1/VEGFA/NRP1/USH1C/KDM5B/XRN2/ATF6/PDS5B/SIPA1L3/TSPAN12/NIPBL/NECTIN3/TUG1/TWSG1/RHOJ/LPCAT1/RDH10/SLC17A8/SH3PXD2B/FREM2	52
BP	GO:0045740	positive regulation of DNA replication	10/1752	36/18670	0.00134314	0.0186508	0.0154211	ATRX/CDK1/CDK2/DHX9/EGFR/PCNA/CDC7/DBF4/E2F8/E2F7	10
BP	GO:0006888	ER to Golgi vesicle-mediated transport	34/1752	212/18670	0.00136858	0.018959	0.015676	ARCN1/CAPZA2/COPA/COPB1/GAS1/LMAN1/PROS1/TRAPPC10/CUL3/USO1/ZW10/COPB2/SEC24C/SEC24D/SEC24B/COG5/SEC23A/HYOU1/SEC24A/KDELR2/KDELR3/SEC31A/TMED5/STX17/BCAP29/COG6/KLHL12/RINT1/TRAPPC11/PGAP1/YIPF5/MCFD2/LRRK2/MIA3	34
BP	GO:0071375	cellular response to peptide hormone stimulus	47/1752	321/18670	0.00144823	0.020015	0.0165491	ADCY7/APC/ATP2B1/CAV1/CCNA2/CDC6/CDK4/CREB1/EPRS1/FER/GJB2/GRB10/GSK3B/MAP1B/MYO5A/OPA1/PIK3CA/PPAT/PRKAA1/PRKAR2B/PRKCI/PRKDC/ROCK1/RPS6KB1/SHC1/SMARCC1/SOS1/SRD5A1/STAT1/STAT3/YWHAG/PIK3R3/USO1/SOCS3/ROCK2/GDF15/LPIN2/HDAC9/RAB31/RAB8B/PHIP/DENND4C/TRIB3/BRIP1/OSBPL8/SOGA1/SESN3	47
BP	GO:0014812	muscle cell migration	20/1752	104/18670	0.00146946	0.0202606	0.0167522	ANXA1/ATP7A/ACE/IGFBP3/IGFBP5/SERPINE1/PLAT/PLAU/PLXNA1/ROCK1/IQGAP1/NRP1/CCN4/DOCK4/POSTN/SSH1/PARVA/SEMA6D/PDGFD/DOCK7	20
BP	GO:0032355	response to estradiol	24/1752	134/18670	0.0014797	0.0203536	0.0168291	ANXA1/CCND1/CASP3/CCNA2/COL1A1/EGFR/ETS1/EZH2/GJB2/IGFBP2/MAP1B/OXTR/PCNA/PTN/RBBP8/SRD5A1/STAT3/NR2F2/TFPI/NCOA3/NRIP1/DDX18/POSTN/KIF18A	24
BP	GO:0050673	epithelial cell proliferation	60/1752	434/18670	0.00148888	0.0203844	0.0168546	APOE/ATP7A/CCND1/BMPR2/BRCA2/CAV1/KRIT1/CDK6/CDKN1C/COL8A1/EFNB2/EGFR/EPHA2/FABP7/MTOR/HIF1A/HOXA5/IGFBP3/IGFBP5/ITGA4/KDR/LAMB1/LAMC1/LOXL2/MCC/MMP14/NGFR/NOTCH2/NRAS/MED1/PRKDC/PROX1/PTN/RB1/ROBO1/SFRP2/SNAI2/SOX11/STAT1/STAT3/ADAM17/NR2F2/TGFB2/TGFBR1/THBS1/VEGFA/SCG2/CASK/NRP2/NRP1/SEMA5A/CYP7B1/KDM5B/NUPR1/UHRF1/AGGF1/CDC73/IQGAP3/BMPER/MIR10B	60
BP	GO:0001945	lymph vessel development	8/1752	25/18670	0.00148891	0.0203844	0.0168546	BMPR2/EFNB2/EPHA2/PROX1/NR2F2/VEGFA/PDPN/HEG1	8
BP	GO:0001701	in utero embryonic development	53/1752	373/18670	0.00149256	0.0203867	0.0168565	ARHGDIG/ATP7A/BRCA2/CCNB1/CDKN1C/EGFR/BPTF/HIF1A/ITGB1/LIF/MSH2/MYH10/NEK2/NPAT/OCRL/PKD2/MED1/PSPH/RBBP8/STIL/SP3/NR2F2/TGFBR1/TP53/TRAF6/KDM6A/VEGFA/XRCC2/CUL3/SOCS3/LATS1/CCNB2/GINS1/SEC24D/PLK4/RTF1/ATP11A/TANC2/CHST11/BCOR/NCAPG2/ASF1B/BIRC6/HEG1/KIDINS220/MIB1/EPB41L5/ALS2/E2F8/PHF6/GINS4/E2F7/RDH10	53
BP	GO:2001022	positive regulation of response to DNA damage stimulus	19/1752	97/18670	0.00152403	0.020768	0.0171717	ATR/BRCA1/DHX9/EGFR/FOXM1/PCNA/PRKDC/TIMELESS/BCLAF1/ACTR2/PAXIP1/SMCHD1/RIF1/TIGAR/PARP9/DTX3L/SPRED1/SPRED2/SPRED3	19
BP	GO:1900542	regulation of purine nucleotide metabolic process	25/1752	142/18670	0.00153226	0.0208316	0.0172244	AK4/ATP7A/CCNB1/CDK1/HIF1A/NUP98/PDK3/PGK1/PRKAA1/RANBP2/STAT3/TP53/TPR/NCOR1/NUP155/NUP58/POM121/NUP153/NUP205/NUP160/ZBTB20/NUPR1/NDC1/TIGAR/POM121C	25
BP	GO:0060562	epithelial tube morphogenesis	47/1752	322/18670	0.00154529	0.0209601	0.0173305	APAF1/CASP3/COL4A1/DAG1/EFNB2/EPHA2/EPHA4/ETV5/HIF1A/HOXA5/TNC/CXCL10/KRAS/LRP6/MET/MMP14/PKD2/PODXL/MED1/PROX1/PTK7/SFRP2/STIL/SOX11/TGFB2/TRAF6/KDM6A/VEGFA/LUZP1/FZD1/FZD6/DCHS1/NRP1/TIMELESS/DLG5/KIF20B/SPRY1/SPRY2/SEC24B/KDM5B/KIF26B/MIB1/SHROOM3/CTHRC1/RDH10/ARL13B/NPNT	47
BP	GO:0043467	regulation of generation of precursor metabolites and energy	27/1752	158/18670	0.00160509	0.0217046	0.0179461	AK4/ATP7A/CCNB1/CDK1/MTOR/GSK3B/HIF1A/NUP98/PGK1/PIK3CA/PRKAA1/RANBP2/STAT3/TP53/TPR/NCOR1/NUP155/NUP58/POM121/NUP153/NUP205/NUP160/ZBTB20/NUPR1/NDC1/TIGAR/POM121C	27
BP	GO:0051299	centrosome separation	6/1752	15/18670	0.00160761	0.0217046	0.0179461	CHEK1/KIF11/NEK2/AURKA/MAP9/UBXN2B	6
BP	GO:0006109	regulation of carbohydrate metabolic process	33/1752	206/18670	0.00162691	0.0219146	0.0181198	CLTC/CRY1/EP300/MTOR/GSK3B/HIF1A/HRH1/IGFBP3/NUP98/P2RY1/PDK3/PRKAA1/RANBP2/STAT3/TP53/TPR/NCOR1/NUP155/NUP58/POM121/NUP153/FAM3C/NCOA2/NUP205/NUP160/ZBTB20/NUPR1/NDC1/TIGAR/SLC35B4/SLC45A3/SOGA1/POM121C	33
BP	GO:0001953	negative regulation of cell-matrix adhesion	11/1752	43/18670	0.00164107	0.0219419	0.0181424	JAG1/HOXA7/MMP14/SERPINE1/RASA1/THBS1/CASK/POSTN/FAM107A/ACER2/NEXMIF	11
BP	GO:0010824	regulation of centrosome duplication	11/1752	43/18670	0.00164107	0.0219419	0.0181424	BRCA1/CCNF/STIL/XPO1/ALMS1/ROCK2/PLK4/PLK2/POC1A/CEP295/GEN1	11
BP	GO:0051293	establishment of spindle localization	11/1752	43/18670	0.00164107	0.0219419	0.0181424	CENPA/MAD2L1/PLK1/ZW10/ESPL1/SPRY1/SPRY2/NDC80/GPSM2/NUSAP1/UBXN2B	11
BP	GO:0150063	visual system development	52/1752	366/18670	0.00164805	0.0219419	0.0181424	JAG1/SHROOM2/ATP2B1/ATP2B4/BMPR2/CASP2/CDK4/CDKN1C/COL4A1/COL5A1/COL5A2/COL8A1/EGFR/EPHA2/GPD2/HIF1A/LRP6/MYH10/OPA1/MED1/PRKCI/PROX1/PTN/RARB/RORB/RRM1/SOS1/SOX11/SP3/STAT3/TGFB2/TGFBR1/NR2E1/VEGFA/NRP1/USH1C/KDM5B/XRN2/ATF6/PDS5B/SIPA1L3/TSPAN12/NIPBL/NECTIN3/TUG1/TWSG1/RHOJ/LPCAT1/RDH10/SLC17A8/SH3PXD2B/FREM2	52
BP	GO:0003401	axis elongation	9/1752	31/18670	0.00165146	0.0219419	0.0181424	HOXD13/TNC/LRP6/MED1/PTK7/SFRP2/SPRY1/SPRY2/RDH10	9
BP	GO:0071539	protein localization to centrosome	9/1752	31/18670	0.00165146	0.0219419	0.0181424	APC/BICD1/GSK3B/STIL/AURKA/SPAG5/CEP192/NEDD1/UBXN2B	9
BP	GO:0007099	centriole replication	10/1752	37/18670	0.0016879	0.0223246	0.0184588	BRCA1/CDK2/STIL/ALMS1/CEP135/PLK4/PLK2/CEP152/CEP295/WDR62	10
BP	GO:0033280	response to vitamin D	10/1752	37/18670	0.0016879	0.0223246	0.0184588	ATP2B1/TNC/CXCL10/MED1/PTN/SNAI2/STC1/TRIM25/TRIM24/MIR125B1	10
BP	GO:0043200	response to amino acid	21/1752	113/18670	0.00177416	0.0234125	0.0193583	ATP7A/CASP3/COL1A1/COL1A2/COL3A1/COL4A1/COL5A2/CREB1/DNMT1/EGFR/MTOR/MMP2/OPA1/PCNA/PTN/SST/PDGFD/CPEB4/SESN3/UBR1/CASTOR2	21
BP	GO:0014909	smooth muscle cell migration	18/1752	91/18670	0.0017852	0.0235052	0.0194349	ATP7A/ACE/IGFBP3/IGFBP5/SERPINE1/PLAT/PLAU/PLXNA1/IQGAP1/NRP1/CCN4/DOCK4/POSTN/SSH1/PARVA/SEMA6D/PDGFD/DOCK7	18
BP	GO:0060976	coronary vasculature development	12/1752	50/18670	0.00186097	0.0243929	0.020169	LTBP1/MYH10/PTK7/TBX5/TGFBR1/VEGFA/NRP1/SEC24B/ADAMTS6/CPLANE1/SPRED1/ARID2	12
BP	GO:1900087	positive regulation of G1/S transition of mitotic cell cycle	12/1752	50/18670	0.00186097	0.0243929	0.020169	ANXA1/CCND1/CCND2/CDC6/DDX3X/EGFR/ADAM17/CDC45/CUL4B/ANKRD17/KMT2E/MIR590	12
BP	GO:0032869	cellular response to insulin stimulus	34/1752	216/18670	0.00188806	0.0246925	0.0204167	APC/ATP2B1/CDK4/EPRS1/FER/GRB10/GSK3B/MYO5A/OPA1/PIK3CA/PPAT/PRKAA1/PRKCI/PRKDC/RPS6KB1/SHC1/SMARCC1/SOS1/SRD5A1/STAT1/YWHAG/PIK3R3/USO1/SOCS3/LPIN2/HDAC9/RAB31/RAB8B/PHIP/DENND4C/TRIB3/OSBPL8/SOGA1/SESN3	34
BP	GO:0010631	epithelial cell migration	50/1752	351/18670	0.00189228	0.0246925	0.0204167	ANGPT2/ANXA1/APOE/ARSB/BMPR2/KRIT1/EFNB2/EPHA2/ETS1/MTOR/HIF1A/ITGA3/ITGB1/KDR/LOXL2/MCC/MEOX2/MET/MMP9/PIK3CA/PKN2/PROX1/PTN/PTPRG/ROBO1/STC1/ADAM17/NR2F2/TGFB2/TGFBR1/THBS1/NR2E1/VEGFA/SCG2/PIK3R3/ADAM9/NRP2/NRP1/SEMA5A/ROCK2/HDAC9/PLK2/PAXIP1/SRPX2/RHOJ/EPB41L5/SPRED1/BMPER/MIA3/MIR10B	50
BP	GO:0071482	cellular response to light stimulus	23/1752	129/18670	0.00195211	0.0254165	0.0210153	ATR/CDC25A/CHEK1/CRY1/EIF2S1/EP300/ERCC4/PCNA/POLH/PTN/RBL2/TAF1/TP53/CUL4B/AURKB/POLD3/OPN3/POLK/PBK/RHNO1/SDE2/DHX36/EIF2AK4	23
BP	GO:0009408	response to heat	29/1752	176/18670	0.00196012	0.0254641	0.0210547	ATP2A2/ATR/CAMK2D/EIF2S1/EP300/MTOR/GSK3B/HSPA2/CXCL10/NUP98/RANBP2/SST/HSPA13/THBS1/TPR/BAG5/NUP155/NUP58/POM121/NUP153/HSPH1/NUP205/NUP160/MYOF/NDC1/TCIM/CLPB/DHX36/POM121C	29
BP	GO:0030206	chondroitin sulfate biosynthetic process	8/1752	26/18670	0.00197572	0.0256099	0.0211752	BGN/NCAN/CSPG4/CHSY1/SLC35D1/CHST11/CHPF2/XYLT1	8
BP	GO:0007127	meiosis I	21/1752	114/18670	0.0019866	0.0256373	0.0211978	BRCA2/CKS2/ERCC4/FANCD2/HSPA2/MSH3/PLK1/RAD51/AURKA/TOP2A/RAD54L/PTTG1/TRIP13/ESPL1/RAD50/FBXO5/NDC1/RMI1/BRIP1/MND1/EME1	21
BP	GO:0034968	histone lysine methylation	21/1752	114/18670	0.0019866	0.0256373	0.0211978	ATRX/BRCA1/DNMT1/EZH2/RBBP5/RLF/KDM6A/NSD2/KMT2D/PAXIP1/RTF1/SUZ12/BCOR/PRMT6/RIF1/ASH1L/KMT2E/SMYD2/KMT2C/NSD1/TET3	21
BP	GO:0061001	regulation of dendritic spine morphogenesis	11/1752	44/18670	0.00200544	0.0257483	0.0212896	EPHA4/CAPRIN1/OPA1/UBE3A/LRP8/ACTR2/NLGN1/ARC/SIPA1L1/LRRK2/DHX36	11
BP	GO:0090311	regulation of protein deacetylation	11/1752	44/18670	0.00200544	0.0257483	0.0212896	CAMK2D/EP300/PRKAA1/KDM5A/TP53/VEGFA/NIPBL/LRRK2/SPRED1/SPRED2/SPRED3	11
BP	GO:0075733	intracellular transport of virus	13/1752	57/18670	0.00200842	0.0257483	0.0212896	KPNA2/NUP98/RANBP2/TPR/XPO1/NUP155/NUP58/POM121/NUP153/NUP205/NUP160/NDC1/POM121C	13
BP	GO:1901342	regulation of vasculature development	58/1752	422/18670	0.00202341	0.025848	0.0213721	ANGPT2/ANXA1/BRCA1/KRIT1/CHI3L1/COL4A2/DNMT1/E2F2/EFNB2/EPHA2/ETS1/GTF2I/HIF1A/HOXA5/HSPG2/CXCL10/ITGA5/ITGB1/ITGB8/KDR/SMAD1/MEOX2/NFATC3/NGFR/SERPINE1/PGK1/PTN/ROCK1/S100A1/SFRP2/SOD2/STAT1/STAT3/TGFB2/THBS1/NR2E1/VEGFA/ADAM12/NRP1/SEMA5A/ROCK2/HDAC9/SPRY2/PLK2/TSPAN12/CEMIP2/SRPX2/TNFRSF12A/ERAP1/AGGF1/RHOJ/PDGFD/CREB3L1/MTDH/SPRED1/BMPER/MIR10B/MIR125B1	58
BP	GO:0071383	cellular response to steroid hormone stimulus	38/1752	250/18670	0.00202504	0.025848	0.0213721	ANXA1/ARNTL/ATP1A1/ATP2B1/BRCA1/CRY1/EGFR/EP300/GJB2/MED1/RARB/RB1/RORB/SKP2/SRD5A1/STC1/TAF1/NR2F2/TFPI/NR2E1/NR2C2/UBE3A/KMT2D/NCOA3/NRIP1/PIAS1/USP8/LATS1/CYP7B1/CLOCK/NCOR1/ABHD2/FAM107A/CNOT1/NCOA6/RBFOX2/UBR5/LBH	38
BP	GO:0060348	bone development	34/1752	217/18670	0.00204189	0.0260062	0.0215029	BMPR2/SERPINH1/COL1A1/COL6A2/COL12A1/EP300/LOX/LRP6/LTF/SMAD1/SMAD5/MMP14/MMP16/NOTCH2/MED1/RARB/SFRP2/SHOX2/SRD5A1/STC1/TP53/COL14A1/NSD2/DCHS1/CCN4/TRIP11/LRRC17/CHSY1/POC1A/MBTPS2/RAB23/XYLT1/ANO6/SH3PXD2B	34
BP	GO:0016264	gap junction assembly	5/1752	11/18670	0.00206096	0.0260224	0.0215163	CAV1/ACE/GJB1/GJB2/GJC1	5
BP	GO:0031442	positive regulation of mRNA 3'-end processing	5/1752	11/18670	0.00206096	0.0260224	0.0215163	CCNB1/NCBP1/NUDT21/CDC73/DHX36	5
BP	GO:0045835	negative regulation of meiotic nuclear division	5/1752	11/18670	0.00206096	0.0260224	0.0215163	LIF/RAD1/TTK/TRIP13/FBXO5	5
BP	GO:0046607	positive regulation of centrosome cycle	5/1752	11/18670	0.00206096	0.0260224	0.0215163	ROCK2/PLK4/POC1A/CEP295/UBXN2B	5
BP	GO:0060135	maternal process involved in female pregnancy	14/1752	64/18670	0.0020938	0.0263432	0.0217815	ADCY7/ANGPT2/BMPR2/CNR1/MTOR/GJB2/ITGA3/LIF/MED1/PPAT/PTN/STC1/NR2F2/ASH1L	14
BP	GO:0046825	regulation of protein export from nucleus	10/1752	38/18670	0.0021009	0.0263432	0.0217815	BARD1/GSK3B/TP53/TPR/XPO1/CTDSPL2/GTSE1/XPO5/XPO4/UHMK1	10
BP	GO:0003176	aortic valve development	9/1752	32/18670	0.0021089	0.0263432	0.0217815	JAG1/BMPR2/ELN/RB1/ROBO1/ROBO2/ROCK1/SNAI2/ROCK2	9
BP	GO:0031297	replication fork processing	9/1752	32/18670	0.0021089	0.0263432	0.0217815	ATRX/BRCA2/PCNA/RAD51/WRN/RFWD3/EME1/BOD1L1/GEN1	9
BP	GO:1905508	protein localization to microtubule organizing center	9/1752	32/18670	0.0021089	0.0263432	0.0217815	APC/BICD1/GSK3B/STIL/AURKA/SPAG5/CEP192/NEDD1/UBXN2B	9
BP	GO:0003007	heart morphogenesis	39/1752	259/18670	0.00211877	0.0263537	0.0217902	JAG1/BMPR2/COL5A1/ELN/MTOR/HIF1A/MYL3/NOTCH2/PKD2/MED1/PROX1/RARB/ROBO1/ROBO2/SFRP2/SHOX2/STIL/SNAI2/SOS1/SOX11/TBX5/TGFB2/TGFBR1/TP53/KDM6A/VEGFA/NSD2/FZD1/DCHS1/NRP2/NRP1/SPRY1/SEC24B/NIPBL/PARVA/HEG1/MIB1/ARID2/ARL13B	39
BP	GO:0048588	developmental cell growth	36/1752	234/18670	0.00212136	0.0263537	0.0217902	APOE/BMPR2/CDH4/DCC/FN1/MTOR/GSK3B/ITGA4/ITGB1/MAG/MAP1B/NRCAM/PLXNA1/AURKA/VCL/VEGFA/KMT2D/USP9X/IQGAP1/NRP2/NRP1/SEMA5A/POSTN/ADNP/FLRT3/NIN/MEX3C/TNFRSF12A/RAPH1/SEMA6D/SPG11/PLXNA4/WDR36/PI16/DRAXIN/EIF2AK4	36
BP	GO:0090398	cellular senescence	16/1752	78/18670	0.00212326	0.0263537	0.0217902	ARNTL/CDK6/KRAS/OPA1/PRKDC/RBL1/TP53/KAT6A/NAMPT/PLK2/NEK6/SMC5/FBXO5/PRMT6/SMC6/MIR590	16
BP	GO:0045637	regulation of myeloid cell differentiation	38/1752	251/18670	0.00217579	0.0269484	0.0222819	JAG1/CDK6/CREB1/EP300/ETS1/MTOR/HIF1A/HMGB3/HOXA5/HOXA7/LIF/LOX/LTF/KITLG/NOTCH2/MED1/PURB/RB1/RBBP5/CCL3/STAT1/STAT3/THBS1/KLF10/TRAF6/KMT2D/CD101/LRRC17/RBFOX2/SENP1/NCAPG2/PRMT6/KMT2E/KMT2C/CDC73/UBASH3B/ZNF675/MIR125B1	38
BP	GO:0050807	regulation of synapse organization	34/1752	218/18670	0.00220641	0.0272699	0.0225477	APOE/CDC20/CDH2/DAG1/EPHA4/ETV5/GAP43/IL1RAP/CAPRIN1/NRCAM/OPA1/OXTR/PTN/PTPRO/ROBO2/UBE3A/LRP8/FZD1/NRP2/DLG5/HOMER1/ACTR2/NLGN1/ARC/ADNP/FLRT3/SIPA1L1/SRPX2/SSH1/LRRN3/LRRN1/LRRK2/DHX36/LRRTM3	34
BP	GO:0048880	sensory system development	52/1752	371/18670	0.0022118	0.0272788	0.0225551	JAG1/SHROOM2/ATP2B1/ATP2B4/BMPR2/CASP2/CDK4/CDKN1C/COL4A1/COL5A1/COL5A2/COL8A1/EGFR/EPHA2/GPD2/HIF1A/LRP6/MYH10/OPA1/MED1/PRKCI/PROX1/PTN/RARB/RORB/RRM1/SOS1/SOX11/SP3/STAT3/TGFB2/TGFBR1/NR2E1/VEGFA/NRP1/USH1C/KDM5B/XRN2/ATF6/PDS5B/SIPA1L3/TSPAN12/NIPBL/NECTIN3/TUG1/TWSG1/RHOJ/LPCAT1/RDH10/SLC17A8/SH3PXD2B/FREM2	52
BP	GO:0006096	glycolytic process	21/1752	115/18670	0.00222021	0.0273219	0.0225908	HIF1A/NUP98/PGK1/PRKAA1/RANBP2/STAT3/TP53/TPR/NCOR1/NUP155/NUP58/POM121/NUP153/NUP205/NUP160/ZBTB20/NUPR1/NDC1/TIGAR/PGM2L1/POM121C	21
BP	GO:0048146	positive regulation of fibroblast proliferation	12/1752	51/18670	0.00222931	0.0273219	0.0225908	CCNA2/CCNB1/CDC6/CDK4/CDK6/DHX9/E2F1/EGFR/FN1/FOSL2/PRKDC/PDGFD	12
BP	GO:0050999	regulation of nitric-oxide synthase activity	12/1752	51/18670	0.00222931	0.0273219	0.0225908	APOE/ATP2B4/CAV1/CNR1/DHFR/EGFR/HIF1A/KRAS/S100A1/WASL/LYPLA1/DHFRP1	12
BP	GO:0019058	viral life cycle	47/1752	328/18670	0.0022563	0.0275549	0.0227834	ADAR/APOE/CAV1/CDK1/DAG1/DDX3X/EFNB2/EGFR/EPHA2/ITGA5/ITGAV/ITGB1/KPNA2/LTF/MOG/NUP98/OAS3/PLSCR1/PKN2/EIF2AK2/PROX1/PTX3/PVR/RANBP2/SRPK2/TFRC/TOP2A/TPR/XPO1/TRIM25/DEK/EEA1/XPR1/ROCK2/NUP155/NUP58/POM121/NUP153/MID2/NUP205/NUP160/RESF1/NDC1/ZC3HAV1/ITCH/EIF2AK4/POM121C	47
BP	GO:0036120	cellular response to platelet-derived growth factor stimulus	7/1752	21/18670	0.00225775	0.0275549	0.0227834	ATP7A/CBL/CCNA2/CREB1/PTN/IQGAP1/PDGFD	7
BP	GO:0090132	epithelium migration	50/1752	354/18670	0.00226391	0.0275725	0.022798	ANGPT2/ANXA1/APOE/ARSB/BMPR2/KRIT1/EFNB2/EPHA2/ETS1/MTOR/HIF1A/ITGA3/ITGB1/KDR/LOXL2/MCC/MEOX2/MET/MMP9/PIK3CA/PKN2/PROX1/PTN/PTPRG/ROBO1/STC1/ADAM17/NR2F2/TGFB2/TGFBR1/THBS1/NR2E1/VEGFA/SCG2/PIK3R3/ADAM9/NRP2/NRP1/SEMA5A/ROCK2/HDAC9/PLK2/PAXIP1/SRPX2/RHOJ/EPB41L5/SPRED1/BMPER/MIA3/MIR10B	50
BP	GO:0006140	regulation of nucleotide metabolic process	25/1752	146/18670	0.00227514	0.0276517	0.0228635	AK4/ATP7A/CCNB1/CDK1/HIF1A/NUP98/PDK3/PGK1/PRKAA1/RANBP2/STAT3/TP53/TPR/NCOR1/NUP155/NUP58/POM121/NUP153/NUP205/NUP160/ZBTB20/NUPR1/NDC1/TIGAR/POM121C	25
BP	GO:0050803	regulation of synapse structure or activity	35/1752	227/18670	0.00233502	0.0283206	0.0234165	APOE/CDC20/CDH2/DAG1/EPHA4/ETV5/GAP43/IL1RAP/CAPRIN1/NRCAM/OPA1/OXTR/PTN/PTPRO/ROBO2/UBE3A/LRP8/FZD1/NRP2/DLG5/HOMER1/ACTR2/NLGN1/ARC/ADNP/FLRT3/SIPA1L1/SRPX2/SSH1/LRRN3/LRRN1/LRRK2/DHX36/SLC17A8/LRRTM3	35
BP	GO:0000076	DNA replication checkpoint	6/1752	16/18670	0.00236943	0.0285379	0.0235962	CDC6/ORC1/CDC45/TIMELESS/TOPBP1/CLSPN	6
BP	GO:0033631	cell-cell adhesion mediated by integrin	6/1752	16/18670	0.00236943	0.0285379	0.0235962	ITGA4/ITGA5/ITGB1/PODXL/ADAM9/NPNT	6
BP	GO:0055119	relaxation of cardiac muscle	6/1752	16/18670	0.00236943	0.0285379	0.0235962	ATP1A1/ATP2A2/CAMK2D/PDE4B/PDE4D/PDE5A	6
BP	GO:0060828	regulation of canonical Wnt signaling pathway	42/1752	286/18670	0.00237345	0.0285379	0.0235962	APC/APOE/ARNTL/CAV1/CDH2/COL1A1/CSNK1A1/CSNK1G3/CTNND1/DDX3X/EGFR/GSK3B/IGFBP2/LRP6/MCC/CDK14/PTK7/PTPRO/SFRP2/SNAI2/FZD1/FZD6/CUL3/TNKS/LIMD1/SEMA5A/USP8/LATS1/USP34/PSME4/TMEM131L/INVS/UBR5/CSNK1G1/SCYL2/KLHL12/BICC1/CTHRC1/LRRK2/LYPD6/ASPM/DRAXIN	42
BP	GO:0006890	retrograde vesicle-mediated transport, Golgi to ER	17/1752	86/18670	0.0023789	0.0285379	0.0235962	ARCN1/CENPE/COPA/COPB1/KIF2A/KIF11/ZW10/COPB2/KIF23/KIF2C/KDELR2/KDELR3/KIF4A/RACGAP1/KIF15/RINT1/KIF18A	17
BP	GO:0048762	mesenchymal cell differentiation	34/1752	219/18670	0.00238223	0.0285379	0.0235962	JAG1/COL1A1/DAG1/EPHA3/EZH2/FN1/MTOR/GCNT2/GSK3B/HIF1A/LOXL2/LRP6/KITLG/SFRP2/SNAI2/SOX11/STAT1/TBX5/TGFB2/TGFBR1/NRP2/NRP1/SEMA5A/DLG5/SPRY1/PDPN/EPB41L5/KLHL12/SEMA6D/FAM83D/FAM172A/RDH10/BCL9L/MIR590	34
BP	GO:0010569	regulation of double-strand break repair via homologous recombination	11/1752	45/18670	0.0024329	0.0290853	0.0240488	CHEK1/RAD51/TP53BP1/TIMELESS/ACTR2/RAD51AP1/SMCHD1/PARPBP/RIF1/FIGNL1/RMI2	11
BP	GO:0014823	response to activity	14/1752	65/18670	0.0024425	0.0291405	0.0240944	ANGPT2/CBL/CDK1/COL4A2/CREB1/CRY1/MTOR/HIF1A/OPA1/PRKAA1/PRKDC/PTN/SRD5A1/POSTN	14
BP	GO:0060485	mesenchyme development	41/1752	278/18670	0.00245207	0.0291951	0.0241396	JAG1/BMPR2/COL1A1/DAG1/EPHA3/EZH2/FN1/MTOR/GCNT2/GSK3B/HIF1A/HOXA5/LOXL2/LRP6/KITLG/PKD2/PTK7/ROBO1/ROBO2/SFRP2/SNAI2/SOX11/STAT1/TBX5/TGFB2/TGFBR1/DCHS1/NRP2/NRP1/SEMA5A/DLG5/SPRY1/PDPN/EPB41L5/KLHL12/SEMA6D/FAM83D/FAM172A/RDH10/BCL9L/MIR590	41
BP	GO:0006757	ATP generation from ADP	21/1752	116/18670	0.00247662	0.0294275	0.0243317	HIF1A/NUP98/PGK1/PRKAA1/RANBP2/STAT3/TP53/TPR/NCOR1/NUP155/NUP58/POM121/NUP153/NUP205/NUP160/ZBTB20/NUPR1/NDC1/TIGAR/PGM2L1/POM121C	21
BP	GO:0060968	regulation of gene silencing	26/1752	155/18670	0.00253071	0.0300092	0.0248127	ADAR/CDK2/DHX9/DNMT1/EGFR/NUP98/POLR2B/RANBP2/STAT3/TP53/TPR/CDC45/LIMD1/NCOR1/NUP155/NUP58/POM121/NUP153/NUP205/NUP160/ATAD2/RESF1/NDC1/ATF7IP/XPO5/POM121C	26
BP	GO:0000188	inactivation of MAPK activity	8/1752	27/18670	0.00257957	0.030465	0.0251895	CAV1/DUSP4/DUSP5/DUSP6/DUSP16/SPRED1/SPRED2/SPRED3	8
BP	GO:0003148	outflow tract septum morphogenesis	8/1752	27/18670	0.00257957	0.030465	0.0251895	BMPR2/RARB/ROBO1/ROBO2/TGFB2/NRP2/NRP1/PARVA	8
BP	GO:0030204	chondroitin sulfate metabolic process	10/1752	39/18670	0.00259146	0.0305437	0.0252547	ARSB/BGN/NCAN/CSPG4/CHSY1/SLC35D1/CHST11/CHPF2/XYLT1/DSEL	10
BP	GO:0050890	cognition	43/1752	296/18670	0.00261216	0.0307257	0.0254052	APOE/CASP3/CNR1/CREB1/EGFR/EN1/EP300/FEN1/MTOR/GRM5/HIF1A/HMGCR/HRH1/ITGA3/ITGA5/ITGB1/KRAS/OXTR/PRKAR2B/PTN/PTPRZ1/SCN2A/CNTN2/TUSC3/PIAS1/SYNJ1/PJA2/DOP1B/ACTR2/CHL1/PLK2/FAM107A/ARC/ADNP/NIPBL/SHC3/NLGN4X/NETO1/PPP1R1B/POMK/TANC1/ATXN1L/EIF2AK4	43
BP	GO:0006301	postreplication repair	12/1752	52/18670	0.00265506	0.0310584	0.0256802	BRCA1/MSH2/PCNA/POLH/REV3L/RFC3/TRIM25/PCLAF/POLD3/POLK/DTL/RAD18	12
BP	GO:0046580	negative regulation of Ras protein signal transduction	12/1752	52/18670	0.00265506	0.0310584	0.0256802	ITGA3/ITGB1/MET/RASA1/TGFB2/CUL3/SPRY1/SPRY2/HEG1/SPRY4/ARHGAP42/TRIM67	12
BP	GO:0045765	regulation of angiogenesis	53/1752	383/18670	0.00266	0.0310584	0.0256802	ANGPT2/ANXA1/BRCA1/KRIT1/CHI3L1/COL4A2/E2F2/EPHA2/ETS1/GTF2I/HIF1A/HOXA5/HSPG2/CXCL10/ITGA5/ITGB1/ITGB8/KDR/SMAD1/MEOX2/NGFR/SERPINE1/PGK1/PTN/ROCK1/S100A1/SFRP2/STAT1/STAT3/TGFB2/THBS1/NR2E1/VEGFA/ADAM12/NRP1/SEMA5A/ROCK2/HDAC9/SPRY2/PLK2/TSPAN12/CEMIP2/SRPX2/TNFRSF12A/ERAP1/AGGF1/RHOJ/CREB3L1/MTDH/SPRED1/BMPER/MIR10B/MIR125B1	53
BP	GO:0043434	response to peptide hormone	59/1752	436/18670	0.00266169	0.0310584	0.0256802	ADCY7/ANXA1/APC/ATP2B1/CAV1/CCNA2/CDC6/CDK4/COL1A1/CREB1/CRY1/DAG1/EPRS1/FER/MTOR/GJB2/GRB10/GSK3B/IGFBP5/LRP6/MAP1B/MYO5A/OPA1/OXTR/PIK3CA/PPAT/PRKAA1/PRKAR2B/PRKCI/PRKDC/ROCK1/RPS6KB1/SHC1/SMARCC1/SOS1/SRD5A1/STAT1/STAT3/TIMP1/YWHAG/PIK3R3/USO1/IQGAP1/GGH/SOCS3/ROCK2/GDF15/LPIN2/HDAC9/RNF40/RAB31/RAB8B/PHIP/DENND4C/TRIB3/BRIP1/OSBPL8/SOGA1/SESN3	59
BP	GO:0001763	morphogenesis of a branching structure	31/1752	196/18670	0.00270495	0.0314376	0.0259938	COL4A1/DAG1/EPHA2/ETV5/HOXA5/HOXD13/TNC/KRAS/LRP6/MET/MMP14/PKD2/PLXNA1/MED1/PROX1/SFRP2/SHOX2/SNAI2/VEGFA/DCHS1/NRP1/TIMELESS/SOCS3/DLG5/SPRY1/SPRY2/KDM5B/ERMN/LRRK2/RDH10/NPNT	31
BP	GO:0051236	establishment of RNA localization	31/1752	196/18670	0.00270495	0.0314376	0.0259938	ATR/DHX9/NCBP1/NUP98/RANBP2/ABCE1/TPR/XPO1/TNKS/NUP155/CKAP5/NUP58/POM121/G3BP2/NUP153/LRPPRC/IGF2BP3/IGF2BP2/XPOT/SMG1/NUP205/ARC/NUP160/SMG6/CDC40/SDAD1/NDC1/PARP11/XPO5/FYTTD1/POM121C	31
BP	GO:0001837	epithelial to mesenchymal transition	24/1752	140/18670	0.00271035	0.0314379	0.025994	JAG1/COL1A1/DAG1/EPHA3/EZH2/MTOR/GCNT2/GSK3B/HIF1A/LOXL2/LRP6/SFRP2/SNAI2/TBX5/TGFB2/TGFBR1/DLG5/SPRY1/PDPN/EPB41L5/KLHL12/FAM83D/BCL9L/MIR590	24
BP	GO:0006367	transcription initiation from RNA polymerase II promoter	30/1752	188/18670	0.00273748	0.0316711	0.0261868	CCND1/CCNB1/CDK1/CDK4/CREB1/E2F2/E2F3/GTF2I/NOTCH2/POLR2B/MED1/RARB/RORB/TAF1/TAF2/TBX5/TCF4/TEAD1/NR2E1/TP53/NR2C2/ZNF45/PPM1D/MED14/MED23/MED13/PAXIP1/ATF7IP/CAND1/DHX36	30
BP	GO:0035107	appendage morphogenesis	25/1752	148/18670	0.00274936	0.0316711	0.0261868	ATRX/EN1/HOXC10/HOXD9/HOXD10/HOXD13/AFF3/LRP6/PLXNA2/MED1/RARB/SFRP2/SHOX2/SOX11/TBX5/TGFB2/FZD6/NIPBL/CHST11/MAP3K20/LMBR1/CPLANE1/LNPK/RDH10/FREM2	25
BP	GO:0035108	limb morphogenesis	25/1752	148/18670	0.00274936	0.0316711	0.0261868	ATRX/EN1/HOXC10/HOXD9/HOXD10/HOXD13/AFF3/LRP6/PLXNA2/MED1/RARB/SFRP2/SHOX2/SOX11/TBX5/TGFB2/FZD6/NIPBL/CHST11/MAP3K20/LMBR1/CPLANE1/LNPK/RDH10/FREM2	25
BP	GO:0043666	regulation of phosphoprotein phosphatase activity	21/1752	117/18670	0.00275754	0.0316711	0.0261868	RCAN1/MTOR/GSK3B/IGFBP3/ITGA1/PPP1R12A/PPP1R1A/PPP2R5E/EIF2AK2/PTN/ROCK1/ROCK2/LMTK2/SLC39A10/PPP1R14C/PPP1R1B/PPP1R15B/MASTL/PPP1R14A/BOD1L1/TIPRL	21
BP	GO:1900371	regulation of purine nucleotide biosynthetic process	21/1752	117/18670	0.00275754	0.0316711	0.0261868	AK4/HIF1A/NUP98/PDK3/PRKAA1/RANBP2/STAT3/TP53/TPR/NCOR1/NUP155/NUP58/POM121/NUP153/NUP205/NUP160/ZBTB20/NUPR1/NDC1/TIGAR/POM121C	21
BP	GO:0009100	glycoprotein metabolic process	57/1752	419/18670	0.00276716	0.0317192	0.0262266	ARSB/ATP7A/BGN/BMPR2/NCAN/CSPG4/DDOST/EXT2/EXTL2/EXTL3/FKTN/GALNT2/GCNT2/GFPT1/HIF1A/STT3A/LMAN1/PTX3/RPN2/SEL1L/SOAT1/TUSC3/B3GALT1/TRIP11/B4GALT5/HS2ST1/HS3ST3B1/ARFGEF1/MAN1A2/CHSY1/SLC35D1/GANAB/DPY19L1/POFUT1/FBXO2/ST8SIA5/CHST11/CHPF2/GALNT10/UGGT1/XYLT1/POGLUT2/EDEM3/POMK/ST6GAL2/MCFD2/DSEL/CANT1/POGLUT3/ALG10B/B3GALNT2/XXYLT1/TMTC3/TET3/ACER2/DPY19L2P2/ALG11	57
BP	GO:0033619	membrane protein proteolysis	13/1752	59/18670	0.00278392	0.0317923	0.026287	APOE/DAG1/NGFR/ROCK1/ADAM17/TIMP1/TIMP3/TRAF6/ADAM19/ADAM9/MBTPS2/ERAP1/SPPL2A	13
BP	GO:0097061	dendritic spine organization	16/1752	80/18670	0.00278441	0.0317923	0.026287	APOE/EPHA4/ITGA3/CAPRIN1/OPA1/UBE3A/LRP8/WASL/HOMER1/ACTR2/NLGN1/ARC/SIPA1L1/TANC1/LRRK2/DHX36	16
BP	GO:0030326	embryonic limb morphogenesis	22/1752	125/18670	0.00285555	0.0324777	0.0268538	EN1/HOXC10/HOXD9/HOXD10/HOXD13/AFF3/LRP6/MED1/RARB/SFRP2/SHOX2/TBX5/TGFB2/FZD6/NIPBL/CHST11/MAP3K20/LMBR1/CPLANE1/LNPK/RDH10/FREM2	22
BP	GO:0035113	embryonic appendage morphogenesis	22/1752	125/18670	0.00285555	0.0324777	0.0268538	EN1/HOXC10/HOXD9/HOXD10/HOXD13/AFF3/LRP6/MED1/RARB/SFRP2/SHOX2/TBX5/TGFB2/FZD6/NIPBL/CHST11/MAP3K20/LMBR1/CPLANE1/LNPK/RDH10/FREM2	22
BP	GO:0006403	RNA localization	35/1752	230/18670	0.0029135	0.0330725	0.0273455	ATR/BICD1/CCT6A/DHX9/NCBP1/NUP98/RANBP2/ABCE1/TPR/XPO1/TNKS/NUP155/CKAP5/NUP58/POM121/G3BP2/NUP153/LRPPRC/IGF2BP3/IGF2BP2/XPOT/SMG1/NUP205/ARC/NUP160/SMG6/CDC40/SDAD1/NDC1/PARP11/XPO5/FYTTD1/DCP2/DHX36/POM121C	35
BP	GO:0019362	pyridine nucleotide metabolic process	30/1752	189/18670	0.00296912	0.0335734	0.0277597	DLD/GPD2/HIF1A/IDH1/NT5E/NUP98/PGK1/PRKAA1/RANBP2/STAT3/TP53/TPR/TP53I3/NCOR1/NUP155/NUP58/POM121/NUP153/NAMPT/NUP205/NUP160/NNT/ZBTB20/NUPR1/PGM2/NDC1/TIGAR/PARP9/PGM2L1/POM121C	30
BP	GO:0046496	nicotinamide nucleotide metabolic process	30/1752	189/18670	0.00296912	0.0335734	0.0277597	DLD/GPD2/HIF1A/IDH1/NT5E/NUP98/PGK1/PRKAA1/RANBP2/STAT3/TP53/TPR/TP53I3/NCOR1/NUP155/NUP58/POM121/NUP153/NAMPT/NUP205/NUP160/NNT/ZBTB20/NUPR1/PGM2/NDC1/TIGAR/PARP9/PGM2L1/POM121C	30
BP	GO:0051092	positive regulation of NF-kappaB transcription factor activity	25/1752	149/18670	0.00301628	0.0340409	0.0281462	ALK/CAV1/DHX9/FER/IL1RAP/KRAS/LTF/MYD88/PRKCI/EIF2AK2/STAT3/TRAF5/TRAF6/TRIM25/CLOCK/TRIM14/MALT1/MID2/ERC1/DHX33/EDA2R/MTDH/MTPN/RTKN2/TAB3	25
BP	GO:1901522	positive regulation of transcription from RNA polymerase II promoter involved in cellular response to chemical stimulus	7/1752	22/18670	0.00304621	0.0342464	0.0283162	EP300/HIF1A/SMAD1/SMAD5/TP53/VEGFA/CHD6	7
BP	GO:2000773	negative regulation of cellular senescence	7/1752	22/18670	0.00304621	0.0342464	0.0283162	CDK6/PRKDC/RBL1/NAMPT/PLK2/FBXO5/MIR590	7
BP	GO:0030808	regulation of nucleotide biosynthetic process	21/1752	118/18670	0.00306477	0.0343889	0.028434	AK4/HIF1A/NUP98/PDK3/PRKAA1/RANBP2/STAT3/TP53/TPR/NCOR1/NUP155/NUP58/POM121/NUP153/NUP205/NUP160/ZBTB20/NUPR1/NDC1/TIGAR/POM121C	21
BP	GO:0007611	learning or memory	38/1752	256/18670	0.00308385	0.0345367	0.0285562	APOE/CASP3/CNR1/CREB1/EGFR/EN1/EP300/FEN1/MTOR/GRM5/HIF1A/HMGCR/HRH1/ITGA3/ITGA5/ITGB1/KRAS/OXTR/PRKAR2B/PTN/PTPRZ1/SCN2A/CNTN2/PIAS1/SYNJ1/PJA2/ACTR2/PLK2/ARC/ADNP/SHC3/NLGN4X/NETO1/PPP1R1B/POMK/TANC1/ATXN1L/EIF2AK4	38
BP	GO:0043542	endothelial cell migration	40/1752	273/18670	0.00309113	0.0345521	0.028569	ANGPT2/ANXA1/APOE/BMPR2/KRIT1/EFNB2/EPHA2/ETS1/HIF1A/ITGB1/KDR/LOXL2/MEOX2/MET/PIK3CA/PROX1/PTN/ROBO1/STC1/ADAM17/NR2F2/TGFBR1/THBS1/NR2E1/VEGFA/SCG2/PIK3R3/NRP2/NRP1/SEMA5A/ROCK2/HDAC9/PLK2/PAXIP1/SRPX2/RHOJ/SPRED1/BMPER/MIA3/MIR10B	40
BP	GO:0007229	integrin-mediated signaling pathway	19/1752	103/18670	0.00312361	0.0348485	0.028814	COL3A1/FLNA/ITGA1/ITGA3/ITGA4/ITGA5/ITGA7/ITGAV/ITGB1/ITGB8/NEDD9/PLP1/PTN/TIMP1/CUL3/ADAM9/NRP1/VAV3/FERMT2	19
BP	GO:0045840	positive regulation of mitotic nuclear division	12/1752	53/18670	0.00314456	0.034944	0.0288929	RB1/AURKA/CUL3/ESPL1/DLGAP5/UBE2C/SMC5/NIPBL/NUSAP1/PHIP/CDCA5/UBXN2B	12
BP	GO:0046031	ADP metabolic process	22/1752	126/18670	0.00316022	0.034944	0.0288929	AK4/HIF1A/NUP98/PGK1/PRKAA1/RANBP2/STAT3/TP53/TPR/NCOR1/NUP155/NUP58/POM121/NUP153/NUP205/NUP160/ZBTB20/NUPR1/NDC1/TIGAR/PGM2L1/POM121C	22
BP	GO:0032467	positive regulation of cytokinesis	10/1752	40/18670	0.00316957	0.034944	0.0288929	CDC6/ECT2/PKN2/CUL3/AURKB/KIF23/KIF20B/KIF14/RACGAP1/MAP10	10
BP	GO:0071526	semaphorin-plexin signaling pathway	10/1752	40/18670	0.00316957	0.034944	0.0288929	FLNA/MET/PLXNA1/PLXNA2/NRP2/NRP1/SEMA5A/PLXNC1/SEMA6D/PLXNA4	10
BP	GO:0098534	centriole assembly	10/1752	40/18670	0.00316957	0.034944	0.0288929	BRCA1/CDK2/STIL/ALMS1/CEP135/PLK4/PLK2/CEP152/CEP295/WDR62	10
BP	GO:0031145	anaphase-promoting complex-dependent catabolic process	16/1752	81/18670	0.00317401	0.034944	0.0288929	BUB1B/CCNB1/CDK1/CDC20/CDK2/MAD2L1/PLK1/AURKA/CUL3/CDC23/AURKB/PTTG1/UBE2C/PSME4/FBXO5/ANAPC1	16
BP	GO:0032204	regulation of telomere maintenance	16/1752	81/18670	0.00317401	0.034944	0.0288929	ATR/ATRX/CCT6A/ERCC4/NEK2/PKIB/XRCC5/TNKS/AURKB/RAD50/SMG1/SMG6/POT1/GNL3L/DCP2/DHX36	16
BP	GO:0090130	tissue migration	50/1752	360/18670	0.0032015	0.0351804	0.0290884	ANGPT2/ANXA1/APOE/ARSB/BMPR2/KRIT1/EFNB2/EPHA2/ETS1/MTOR/HIF1A/ITGA3/ITGB1/KDR/LOXL2/MCC/MEOX2/MET/MMP9/PIK3CA/PKN2/PROX1/PTN/PTPRG/ROBO1/STC1/ADAM17/NR2F2/TGFB2/TGFBR1/THBS1/NR2E1/VEGFA/SCG2/PIK3R3/ADAM9/NRP2/NRP1/SEMA5A/ROCK2/HDAC9/PLK2/PAXIP1/SRPX2/RHOJ/EPB41L5/SPRED1/BMPER/MIA3/MIR10B	50
BP	GO:0030260	entry into host cell	23/1752	134/18670	0.00323027	0.0352316	0.0291308	CAV1/CBL/CDK1/CTNND1/DAG1/EFNB2/EGFR/EPHA2/ITGA5/ITGAV/ITGB1/MET/MOG/PTX3/PVR/TFRC/TRIM25/XPR1/NUP153/MID2/EXOC7/CBLL1/ITCH	23
BP	GO:0044409	entry into host	23/1752	134/18670	0.00323027	0.0352316	0.0291308	CAV1/CBL/CDK1/CTNND1/DAG1/EFNB2/EGFR/EPHA2/ITGA5/ITGAV/ITGB1/MET/MOG/PTX3/PVR/TFRC/TRIM25/XPR1/NUP153/MID2/EXOC7/CBLL1/ITCH	23
BP	GO:0051806	entry into cell of other organism involved in symbiotic interaction	23/1752	134/18670	0.00323027	0.0352316	0.0291308	CAV1/CBL/CDK1/CTNND1/DAG1/EFNB2/EGFR/EPHA2/ITGA5/ITGAV/ITGB1/MET/MOG/PTX3/PVR/TFRC/TRIM25/XPR1/NUP153/MID2/EXOC7/CBLL1/ITCH	23
BP	GO:0051828	entry into other organism involved in symbiotic interaction	23/1752	134/18670	0.00323027	0.0352316	0.0291308	CAV1/CBL/CDK1/CTNND1/DAG1/EFNB2/EGFR/EPHA2/ITGA5/ITGAV/ITGB1/MET/MOG/PTX3/PVR/TFRC/TRIM25/XPR1/NUP153/MID2/EXOC7/CBLL1/ITCH	23
BP	GO:0006983	ER overload response	5/1752	12/18670	0.0032616	0.0353098	0.0291954	GSK3B/TP53/EIF2AK3/CCDC47/PPP1R15B	5
BP	GO:0007077	mitotic nuclear envelope disassembly	5/1752	12/18670	0.0032616	0.0353098	0.0291954	CCNB1/CDK1/PLK1/CCNB2/NEK6	5
BP	GO:0070601	centromeric sister chromatid cohesion	5/1752	12/18670	0.0032616	0.0353098	0.0291954	BUB1/BUB1B/NAA50/SGO2/SGO1	5
BP	GO:1902287	semaphorin-plexin signaling pathway involved in axon guidance	5/1752	12/18670	0.0032616	0.0353098	0.0291954	PLXNA1/PLXNA2/NRP1/PLXNC1/PLXNA4	5
BP	GO:0050678	regulation of epithelial cell proliferation	52/1752	378/18670	0.00328004	0.0354014	0.0292712	APOE/ATP7A/CCND1/BMPR2/BRCA2/CAV1/KRIT1/CDK6/CDKN1C/EFNB2/EGFR/MTOR/HIF1A/HOXA5/ITGA4/KDR/LAMB1/LAMC1/MCC/NGFR/NOTCH2/NRAS/MED1/PRKDC/PROX1/PTN/RB1/ROBO1/SFRP2/SNAI2/SOX11/STAT1/STAT3/ADAM17/NR2F2/TGFB2/TGFBR1/THBS1/VEGFA/SCG2/CASK/NRP2/NRP1/SEMA5A/CYP7B1/KDM5B/NUPR1/UHRF1/AGGF1/CDC73/IQGAP3/MIR10B	52
BP	GO:0001101	response to acid chemical	48/1752	343/18670	0.00329114	0.0354014	0.0292712	ACACA/ATP2B4/ATP7A/CASP3/CCNB1/CDK4/COL1A1/COL1A2/COL3A1/COL4A1/COL5A2/CREB1/DHFR/DNMT1/E2F1/EGFR/EPHA3/MTOR/GJB2/GLDC/HLCS/TNC/IGF2R/IGFBP2/KDR/MMP2/OPA1/PCNA/PDK3/PKD2/PRKAA1/PTK7/PTN/RARB/RORB/SST/TYMS/VEGFA/XRCC5/ADNP2/GNG2/PDGFD/CPEB4/SESN3/UBR1/ACER2/DHFRP1/CASTOR2	48
BP	GO:0006913	nucleocytoplasmic transport	48/1752	343/18670	0.00329114	0.0354014	0.0292712	ARNTL/BARD1/CSE1L/DHX9/ECT2/FLNA/GSK3B/KPNA2/TNPO1/PPP1R12A/NCBP1/NUP98/MED1/RANBP2/ABCE1/STAT3/TP53/TPR/XPO1/NUP155/NUP58/POM121/NUP153/IPO7/MALT1/XPOT/SMG1/NUP205/NUP160/SMG6/TNPO3/GEMIN5/IPO11/CDC40/UBR5/CTDSPL2/GTSE1/RAB23/SDAD1/IPO9/NDC1/XPO5/XPO4/DUSP16/FYTTD1/LRRK2/UHMK1/POM121C	48
BP	GO:0003180	aortic valve morphogenesis	8/1752	28/18670	0.0033185	0.0354014	0.0292712	JAG1/ELN/RB1/ROBO1/ROBO2/ROCK1/SNAI2/ROCK2	8
BP	GO:0033598	mammary gland epithelial cell proliferation	8/1752	28/18670	0.0033185	0.0354014	0.0292712	CCND1/BRCA2/EPHA2/HOXA5/MED1/ROBO1/KDM5B/IQGAP3	8
BP	GO:0070198	protein localization to chromosome, telomeric region	8/1752	28/18670	0.0033185	0.0354014	0.0292712	ATR/ATRX/BRCA2/CCT6A/XRCC5/TNKS/POT1/GNL3L	8
BP	GO:0071168	protein localization to chromatin	8/1752	28/18670	0.0033185	0.0354014	0.0292712	EZH2/MSH2/PLK1/RB1/NIPBL/MCM8/CDCA5/ESCO2	8
BP	GO:0090344	negative regulation of cell aging	8/1752	28/18670	0.0033185	0.0354014	0.0292712	CDK6/FOXM1/PRKDC/RBL1/NAMPT/PLK2/FBXO5/MIR590	8
BP	GO:0033599	regulation of mammary gland epithelial cell proliferation	6/1752	17/18670	0.00337383	0.0358607	0.0296509	CCND1/BRCA2/HOXA5/ROBO1/KDM5B/IQGAP3	6
BP	GO:0062033	positive regulation of mitotic sister chromatid segregation	6/1752	17/18670	0.00337383	0.0358607	0.0296509	RB1/CUL3/ESPL1/DLGAP5/SMC5/NIPBL	6
BP	GO:0042866	pyruvate biosynthetic process	21/1752	119/18670	0.00340018	0.0360099	0.0297743	HIF1A/NUP98/PGK1/PRKAA1/RANBP2/STAT3/TP53/TPR/NCOR1/NUP155/NUP58/POM121/NUP153/NUP205/NUP160/ZBTB20/NUPR1/NDC1/TIGAR/PGM2L1/POM121C	21
BP	GO:0051193	regulation of cofactor metabolic process	21/1752	119/18670	0.00340018	0.0360099	0.0297743	HIF1A/NUP98/PDK3/PRKAA1/RANBP2/STAT3/TP53/TPR/NCOR1/NUP155/NUP58/POM121/NUP153/NUP205/NUP160/NNT/ZBTB20/NUPR1/NDC1/TIGAR/POM121C	21
BP	GO:0032970	regulation of actin filament-based process	53/1752	388/18670	0.00349675	0.0369656	0.0305645	ADD2/RND3/ATP1A1/ATP2A2/CAMK2D/CAPZA2/CAV1/ECT2/ELN/EPHA3/EPS8/FER/FLNA/MTOR/MET/NOTCH2/PDE4B/PDE4D/PROX1/TWF1/RASA1/ROCK1/STC1/TGFBR1/ALMS1/NRP1/WASL/SEMA5A/LATS1/ROCK2/ACTR3/ACTR2/AKAP9/TENM1/ARFGEF1/PDPN/NCKAP1/IQGAP2/TMSB15A/FAM107A/PPM1E/LIMA1/KIRREL1/CCDC88A/RHOJ/CRACD/TAOK1/PLEKHG2/FHOD3/ARHGAP18/FRMD6/MTPN/SH3PXD2B	53
BP	GO:0014911	positive regulation of smooth muscle cell migration	11/1752	47/18670	0.00350821	0.0370199	0.0306094	ATP7A/IGFBP5/IQGAP1/NRP1/CCN4/DOCK4/POSTN/SSH1/SEMA6D/PDGFD/DOCK7	11
BP	GO:0030010	establishment of cell polarity	23/1752	135/18670	0.00355623	0.037459	0.0309724	KRIT1/CENPA/GSK3B/MAD2L1/MAP1B/MSN/PLK1/PRKCI/PTK7/ROCK1/WEE1/ZW10/ROCK2/KIF20B/SPRY1/SPRY2/NDC80/ARFGEF1/SIPA1L3/GPSM2/KIF26B/DOCK7/UBXN2B	23
BP	GO:0006606	protein import into nucleus	24/1752	143/18670	0.00359677	0.0377947	0.03125	ARNTL/CSE1L/ECT2/FLNA/KPNA2/TNPO1/NUP98/MED1/RANBP2/STAT3/TP53/TPR/NUP155/NUP58/POM121/NUP153/IPO7/TNPO3/IPO11/UBR5/RAB23/IPO9/LRRK2/POM121C	24
BP	GO:0010833	telomere maintenance via telomere lengthening	16/1752	82/18670	0.0036075	0.0377947	0.03125	ATR/CCT6A/ERCC4/NEK2/PKIB/RAD51/XRCC5/TNKS/AURKB/RAD50/SMG6/POT1/GNL3L/DCLRE1B/DCP2/DHX36	16
BP	GO:0016925	protein sumoylation	16/1752	82/18670	0.0036075	0.0377947	0.03125	NUP98/RANBP2/TPR/PIAS1/NUP155/NUP58/POM121/NUP153/HMG20A/NUP205/NUP160/SENP1/GNL3L/NDC1/KIAA1586/POM121C	16
BP	GO:0006979	response to oxidative stress	60/1752	451/18670	0.00362189	0.0378775	0.0313185	ANXA1/APOE/ARNTL/ATP2A2/ATP7A/CASP3/CCNA2/CDK1/CDK2/COL1A1/DHFR/DPEP1/ECT2/EGFR/EIF2S1/ETS1/ETV5/EZH2/FANCC/FANCD2/FER/GJB2/HIF1A/IDH1/MET/MMP2/MMP9/MMP14/PCNA/PKD2/PRKAA1/SDC1/SOD2/STAT1/TP53/TXNRD1/UBE3A/WRN/PXDN/FZD1/ATRN/ADAM9/PDLIM1/BAG5/MELK/ADNP2/RRM2B/CYCS/OXR1/SELENON/ALS2/PDGFD/CHD6/PPP1R15B/LRRK2/SESN3/VKORC1L1/ERCC6L2/GPX8/DHFRP1	60
BP	GO:0007044	cell-substrate junction assembly	18/1752	97/18670	0.00370464	0.0386048	0.0319199	ACTN1/EPHA3/FN1/ITGA5/KDR/LAMC1/MMP14/ROCK1/THBS1/VEGFA/PIP5K1A/IQGAP1/NRP1/ROCK2/FERMT2/FAM107A/EPB41L5/PEAK1	18
BP	GO:0060996	dendritic spine development	18/1752	97/18670	0.00370464	0.0386048	0.0319199	APOE/EPHA4/MTOR/CAPRIN1/OPA1/MAPK6/UBE3A/LRP8/WASL/DLG5/ACTR2/PLK2/NLGN1/ARC/SIPA1L1/ASAP1/LRRK2/DHX36	18
BP	GO:1902117	positive regulation of organelle assembly	15/1752	75/18670	0.00371937	0.0386894	0.0319898	MSN/PROX1/SDC1/CEP135/G3BP2/SPAG5/PLK4/CNOT1/RAB3GAP2/GPSM2/ASAP1/SH3GLB1/MNS1/CCDC88A/CEP295	15
BP	GO:0022612	gland morphogenesis	21/1752	120/18670	0.00376573	0.0391021	0.032331	CAV1/DAG1/EGFR/EPHA2/ETV5/HOXD13/TNC/IGFBP5/LRP6/MSN/PLXNA1/MED1/PROX1/PTN/SNAI2/TGFB2/CUL3/NRP1/CYP7B1/KDM5B/TWSG1	21
BP	GO:0008406	gonad development	33/1752	217/18670	0.00380799	0.0394708	0.0326359	ATRX/CCND1/BOK/BRCA2/CASP2/CASP3/CBL/FANCA/FLNA/HMGCS1/IDH1/KITLG/MMP14/MSH2/PTX3/KDM5A/ROBO2/RRM1/SDC1/SFRP2/SRD5A1/TGFB2/TGFBR1/TMF1/UBE3A/VEGFA/NRIP1/FNDC3A/NUPR1/KIF18A/BRIP1/RDH10/ASPM	33
BP	GO:0001841	neural tube formation	19/1752	105/18670	0.00389876	0.0402005	0.0332392	APAF1/CASP3/HIF1A/LRP6/PTK7/SFRP2/STIL/SOX11/TGFB2/TRAF6/KDM6A/LUZP1/FZD1/FZD6/KIF20B/SEC24B/MIB1/SHROOM3/CTHRC1	19
BP	GO:0051169	nuclear transport	48/1752	346/18670	0.00390552	0.0402005	0.0332392	ARNTL/BARD1/CSE1L/DHX9/ECT2/FLNA/GSK3B/KPNA2/TNPO1/PPP1R12A/NCBP1/NUP98/MED1/RANBP2/ABCE1/STAT3/TP53/TPR/XPO1/NUP155/NUP58/POM121/NUP153/IPO7/MALT1/XPOT/SMG1/NUP205/NUP160/SMG6/TNPO3/GEMIN5/IPO11/CDC40/UBR5/CTDSPL2/GTSE1/RAB23/SDAD1/IPO9/NDC1/XPO5/XPO4/DUSP16/FYTTD1/LRRK2/UHMK1/POM121C	48
BP	GO:0034333	adherens junction assembly	17/1752	90/18670	0.0039059	0.0402005	0.0332392	ACTN1/EPHA3/KDR/MMP14/ROCK1/THBS1/VCL/VEGFA/PIP5K1A/IQGAP1/NRP1/DLG5/ROCK2/FERMT2/FAM107A/EPB41L5/PEAK1	17
BP	GO:0045778	positive regulation of ossification	17/1752	90/18670	0.0039059	0.0402005	0.0332392	JAG1/ATP2B1/BMPR2/LTF/SMAD1/SMAD5/PTN/SFRP2/SOX11/TGFB2/CCN4/NIPBL/FBXO5/SUCO/CTHRC1/ANO6/NPNT	17
BP	GO:0007156	homophilic cell adhesion via plasma membrane adhesion molecules	27/1752	168/18670	0.00391802	0.0402544	0.0332838	CDH2/CDH4/CDH6/CDH11/ITGB1/PCDH1/PCDHGC3/PVR/ROBO1/ROBO2/CNTN2/DCHS1/IGSF9B/CADM1/NECTIN3/PCDH17/PCDH18/PCDHGC5/PCDHGC4/PCDHGB2/PCDHB13/PCDHB8/PCDHB7/PCDHAC2/PCDH19/PCDHB16/FAT3	27
BP	GO:0060041	retina development in camera-type eye	24/1752	144/18670	0.00394164	0.0403712	0.0333803	ATP2B1/ATP2B4/BMPR2/CASP2/COL4A1/HIF1A/LRP6/MYH10/OPA1/MED1/PROX1/PTN/RORB/RRM1/TGFB2/NR2E1/NRP1/USH1C/XRN2/TSPAN12/NECTIN3/RHOJ/LPCAT1/SLC17A8	24
BP	GO:0021915	neural tube development	26/1752	160/18670	0.0039432	0.0403712	0.0333803	APAF1/CASP3/EPHA2/EN1/HIF1A/LRP6/PKD2/PLXNA2/PROX1/PTK7/SFRP2/STIL/SOX11/TGFB2/TRAF6/KDM6A/LUZP1/FZD1/FZD6/DCHS1/KIF20B/SEC24B/MIB1/SHROOM3/CTHRC1/ARL13B	26
BP	GO:0051028	mRNA transport	25/1752	152/18670	0.00395195	0.0403901	0.033396	DHX9/NCBP1/NUP98/RANBP2/TPR/XPO1/TNKS/NUP155/NUP58/POM121/G3BP2/NUP153/LRPPRC/IGF2BP3/IGF2BP2/SMG1/NUP205/ARC/NUP160/SMG6/CDC40/NDC1/PARP11/FYTTD1/POM121C	25
BP	GO:0009266	response to temperature stimulus	36/1752	243/18670	0.00402456	0.0409615	0.0338685	ATP2A2/ATP2B1/ATR/CAMK2D/EIF2S1/EP300/MTOR/GSK3B/HSPA2/CXCL10/NUP98/PRKAA1/RANBP2/SST/HSPA13/THBS1/TPR/EIF2AK3/BAG5/NUP155/NUP58/POM121/NUP153/HSPH1/MMP24/NUP205/NUP160/MYOF/PCSK1N/NDC1/TCIM/LXN/CLPB/DHX36/EIF2AK4/POM121C	36
BP	GO:0071305	cellular response to vitamin D	7/1752	23/18670	0.00402889	0.0409615	0.0338685	ATP2B1/TNC/MED1/PTN/SNAI2/TRIM24/MIR125B1	7
BP	GO:0097150	neuronal stem cell population maintenance	7/1752	23/18670	0.00402889	0.0409615	0.0338685	JAG1/CDH2/FANCC/FANCD2/PROX1/MMP24/ASPM	7
BP	GO:0051098	regulation of binding	51/1752	373/18670	0.00403736	0.0409764	0.0338808	ADD2/APOE/CAV1/CSNK1A1/ACE/DHX9/E2F1/EIF2S1/EP300/EPB41/EPHA4/ERCC4/GSK3B/ITGA4/LIF/LOX/MET/MMP9/NCBP1/NEK2/P2RY1/PLK1/RB1/ROCK1/SOX11/AURKA/TAF1/TDG/TGFBR1/TRAF6/TNKS/NRP1/BTAF1/AURKB/PLK2/USP33/ADNP/NIPBL/RSF1/GNL3L/HJURP/EPB41L5/TRIB3/NSD1/PARP9/UBASH3B/CDCA5/CTHRC1/LRRK2/DTX3L/ZNF675	51
BP	GO:0050657	nucleic acid transport	30/1752	193/18670	0.0040699	0.0411637	0.0340357	DHX9/NCBP1/NUP98/RANBP2/ABCE1/TPR/XPO1/TNKS/NUP155/CKAP5/NUP58/POM121/G3BP2/NUP153/LRPPRC/IGF2BP3/IGF2BP2/XPOT/SMG1/NUP205/ARC/NUP160/SMG6/CDC40/SDAD1/NDC1/PARP11/XPO5/FYTTD1/POM121C	30
BP	GO:0050658	RNA transport	30/1752	193/18670	0.0040699	0.0411637	0.0340357	DHX9/NCBP1/NUP98/RANBP2/ABCE1/TPR/XPO1/TNKS/NUP155/CKAP5/NUP58/POM121/G3BP2/NUP153/LRPPRC/IGF2BP3/IGF2BP2/XPOT/SMG1/NUP205/ARC/NUP160/SMG6/CDC40/SDAD1/NDC1/PARP11/XPO5/FYTTD1/POM121C	30
BP	GO:0048145	regulation of fibroblast proliferation	16/1752	83/18670	0.00408849	0.0412804	0.0341321	CCNA2/CCNB1/CDC6/CDK4/CDK6/CREB1/DHX9/E2F1/EGFR/FN1/FOSL2/PRKDC/TP53/NUPR1/CDC73/PDGFD	16
BP	GO:0003230	cardiac atrium development	9/1752	35/18670	0.00410751	0.0413296	0.0341728	BMPR2/NOTCH2/PROX1/SHOX2/SOS1/TBX5/TGFB2/NSD2/HEG1	9
BP	GO:0051294	establishment of spindle orientation	9/1752	35/18670	0.00410751	0.0413296	0.0341728	CENPA/MAD2L1/PLK1/ZW10/SPRY1/SPRY2/NDC80/GPSM2/UBXN2B	9
BP	GO:0002042	cell migration involved in sprouting angiogenesis	18/1752	98/18670	0.00414947	0.04168	0.0344626	ANXA1/EFNB2/ITGB1/KDR/MEOX2/ROBO1/THBS1/NR2E1/VEGFA/PIK3R3/NRP1/HDAC9/PLK2/SRPX2/RHOJ/SPRED1/MIA3/MIR10B	18
BP	GO:0030968	endoplasmic reticulum unfolded protein response	21/1752	121/18670	0.00416346	0.041699	0.0344782	CCND1/BOK/CANX/EIF2S1/EP300/EXTL2/EXTL3/GFPT1/EIF2AK2/SHC1/HSPA13/EIF2AK3/PDIA6/HYOU1/KDELR3/SEC31A/ATF6/MBTPS2/FKBP14/PPP1R15B/CREB3L1	21
BP	GO:0008038	neuron recognition	11/1752	48/18670	0.00417275	0.041699	0.0344782	CASP3/CNR1/EPHA3/EPHA4/GAP43/NRCAM/ROBO1/ROBO2/CNTN2/NRP1/SEMA5A	11
BP	GO:0008542	visual learning	11/1752	48/18670	0.00417275	0.041699	0.0344782	CREB1/MTOR/HIF1A/HMGCR/HRH1/ITGB1/KRAS/PIAS1/NETO1/PPP1R1B/TANC1	11
BP	GO:0006929	substrate-dependent cell migration	8/1752	29/18670	0.00421158	0.0419436	0.0346805	FN1/MYH10/ROBO1/SNAI2/NRP2/NRP1/TNFRSF12A/EPB41L5	8
BP	GO:0060441	epithelial tube branching involved in lung morphogenesis	8/1752	29/18670	0.00421158	0.0419436	0.0346805	DAG1/HOXA5/TNC/KRAS/DLG5/SPRY1/SPRY2/RDH10	8
BP	GO:0051235	maintenance of location	46/1752	330/18670	0.00425463	0.0423003	0.0349754	APOE/BARD1/CAMK2D/CAV1/CRY1/DAG1/DIAPH1/F2R/FLNA/CXCL10/ITGAV/ITPR1/ITPR2/LTBP1/MEST/CXCL9/MYO5A/PDE4D/PKD2/TWF1/CCL3/SOAT1/SQLE/NRIP1/LATS1/G3BP2/AKAP9/TMSB15A/KDELR2/KDELR3/SYNE2/VPS13A/ARL2BP/GPSM2/ABHD5/PLCE1/VPS13C/TBCCD1/SELENON/CEMIP/PDIA2/UBASH3B/OSBPL8/STARD4/SLC30A7/ASPM	46
BP	GO:0002011	morphogenesis of an epithelial sheet	12/1752	55/18670	0.00434203	0.0430229	0.0355729	JAG1/COL5A1/DAG1/FLNA/MTOR/ITGA5/LRP6/SOS1/SOX11/ADAM17/PDPN/FLRT3	12
BP	GO:0048016	inositol phosphate-mediated signaling	12/1752	55/18670	0.00434203	0.0430229	0.0355729	ATP2B4/RCAN1/MTOR/GSK3B/HRH1/ITPR1/ITPR2/NFATC3/PTBP1/NFAT5/PLCE1/GPR62	12
BP	GO:0009880	embryonic pattern specification	13/1752	62/18670	0.00439007	0.0433519	0.0358449	HOXD8/LRP6/SMAD1/SMAD5/MEOX2/STIL/SIM2/KDM6A/NRP2/NRP1/SATB2/EPB41L5/PGAP1	13
BP	GO:1904356	regulation of telomere maintenance via telomere lengthening	13/1752	62/18670	0.00439007	0.0433519	0.0358449	ATR/CCT6A/ERCC4/NEK2/PKIB/XRCC5/TNKS/AURKB/SMG6/POT1/GNL3L/DCP2/DHX36	13
BP	GO:0014910	regulation of smooth muscle cell migration	16/1752	84/18670	0.00462076	0.0453494	0.0374965	ATP7A/ACE/IGFBP3/IGFBP5/SERPINE1/PLAU/PLXNA1/IQGAP1/NRP1/CCN4/DOCK4/POSTN/SSH1/SEMA6D/PDGFD/DOCK7	16
BP	GO:0048144	fibroblast proliferation	16/1752	84/18670	0.00462076	0.0453494	0.0374965	CCNA2/CCNB1/CDC6/CDK4/CDK6/CREB1/DHX9/E2F1/EGFR/FN1/FOSL2/PRKDC/TP53/NUPR1/CDC73/PDGFD	16
BP	GO:0007266	Rho protein signal transduction	31/1752	203/18670	0.0046304	0.0453494	0.0374965	APOE/RND3/ARHGDIG/COL1A2/COL3A1/ECT2/EPS8/F2R/F2RL2/ITGA3/ITGB1/MET/NGFR/ROBO1/ROCK1/SOS1/TRIO/CUL3/CTNNAL1/NRP1/ARHGAP29/ROCK2/VAV3/PDPN/ARHGEF12/ARHGEF3/RHOJ/HEG1/ALS2/PLEKHG2/ARHGAP42	31
BP	GO:0006509	membrane protein ectodomain proteolysis	10/1752	42/18670	0.00463113	0.0453494	0.0374965	APOE/DAG1/ROCK1/ADAM17/TIMP1/TIMP3/ADAM19/ADAM9/ERAP1/SPPL2A	10
BP	GO:0031641	regulation of myelination	10/1752	42/18670	0.00463113	0.0453494	0.0374965	MYRF/DAG1/MTOR/MAG/PTN/PTPRZ1/RARB/EIF2AK3/KIF14/NKX6-2	10
BP	GO:0043555	regulation of translation in response to stress	6/1752	18/18670	0.00466353	0.0455328	0.0376482	EIF2S1/EIF2AK2/RPS6KA3/EIF2AK3/PPP1R15B/EIF2AK4	6
BP	GO:0003231	cardiac ventricle development	22/1752	130/18670	0.00466544	0.0455328	0.0376482	JAG1/BMPR2/HIF1A/LTBP1/MYL3/MED1/PROX1/PTK7/ROBO1/ROBO2/SFRP2/SOX11/TBX5/TGFB2/TGFBR1/NSD2/LUZP1/FZD1/TRIP11/HECTD1/HEG1/CPLANE1	22
BP	GO:0008584	male gonad development	23/1752	138/18670	0.00470382	0.0456029	0.0377061	ATRX/CCND1/BOK/CBL/FANCA/FLNA/HMGCS1/KITLG/MMP14/MSH2/KDM5A/RRM1/SDC1/SFRP2/SRD5A1/TGFB2/TGFBR1/TMF1/FNDC3A/NUPR1/KIF18A/BRIP1/ASPM	23
BP	GO:0009135	purine nucleoside diphosphate metabolic process	23/1752	138/18670	0.00470382	0.0456029	0.0377061	AK4/HIF1A/NUP98/PGK1/PRKAA1/RANBP2/STAT3/TP53/TPR/CASK/NCOR1/NUP155/NUP58/POM121/NUP153/NUP205/NUP160/ZBTB20/NUPR1/NDC1/TIGAR/PGM2L1/POM121C	23
BP	GO:0009179	purine ribonucleoside diphosphate metabolic process	23/1752	138/18670	0.00470382	0.0456029	0.0377061	AK4/HIF1A/NUP98/PGK1/PRKAA1/RANBP2/STAT3/TP53/TPR/CASK/NCOR1/NUP155/NUP58/POM121/NUP153/NUP205/NUP160/ZBTB20/NUPR1/NDC1/TIGAR/PGM2L1/POM121C	23
BP	GO:0030048	actin filament-based movement	23/1752	138/18670	0.00470382	0.0456029	0.0377061	ATP1A1/CAMK2D/CAV1/FLNA/KCND3/MYO1B/MYH10/MYL3/MYO5A/PDE4B/PDE4D/ROCK1/STC1/TPM4/CACNA1G/WASL/NUP155/GJC1/PDPN/SYNE2/PARVA/EPB41L5/FRMD6	23
BP	GO:0072524	pyridine-containing compound metabolic process	30/1752	195/18670	0.00473852	0.0458632	0.0379213	DLD/GPD2/HIF1A/IDH1/NT5E/NUP98/PGK1/PRKAA1/RANBP2/STAT3/TP53/TPR/TP53I3/NCOR1/NUP155/NUP58/POM121/NUP153/NAMPT/NUP205/NUP160/NNT/ZBTB20/NUPR1/PGM2/NDC1/TIGAR/PARP9/PGM2L1/POM121C	30
BP	GO:0000212	meiotic spindle organization	5/1752	13/18670	0.00489392	0.0471332	0.0389715	ATRX/AURKA/ESPL1/FBXO5/ASPM	5
BP	GO:0051315	attachment of mitotic spindle microtubules to kinetochore	5/1752	13/18670	0.00489392	0.0471332	0.0389715	CENPE/NDC80/KIF2C/NUF2/CHAMP1	5
BP	GO:2001034	positive regulation of double-strand break repair via nonhomologous end joining	5/1752	13/18670	0.00489392	0.0471332	0.0389715	PRKDC/SMCHD1/RIF1/PARP9/DTX3L	5
BP	GO:0008361	regulation of cell size	28/1752	179/18670	0.00492955	0.0471656	0.0389982	APOE/ATP7A/BMPR2/CDH4/CDK4/CREB1/DCC/FN1/MTOR/GSK3B/MAG/MAP1B/MSN/NRCAM/VEGFA/NRP1/SEMA5A/SLC12A6/VAV3/ADNP/TNFRSF12A/SEMA6D/PLXNA4/IQGAP3/WDR36/MTPN/ANO6/DRAXIN	28
BP	GO:0048736	appendage development	28/1752	179/18670	0.00492955	0.0471656	0.0389982	ATRX/BMPR2/EN1/HOXC10/HOXD9/HOXD10/HOXD13/AFF3/LRP6/MEOX2/PLXNA2/MED1/RARB/SFRP2/SHOX2/SOX11/TBX5/NR2F2/TGFB2/FZD6/NIPBL/CHST11/MAP3K20/LMBR1/CPLANE1/LNPK/RDH10/FREM2	28
BP	GO:0051099	positive regulation of binding	28/1752	179/18670	0.00492955	0.0471656	0.0389982	ADD2/APOE/CAV1/ACE/DHX9/EIF2S1/EP300/EPB41/EPHA4/GSK3B/MET/MMP9/NCBP1/RB1/TAF1/TRAF6/NRP1/PLK2/USP33/NIPBL/GNL3L/EPB41L5/TRIB3/PARP9/CDCA5/CTHRC1/LRRK2/DTX3L	28
BP	GO:0060173	limb development	28/1752	179/18670	0.00492955	0.0471656	0.0389982	ATRX/BMPR2/EN1/HOXC10/HOXD9/HOXD10/HOXD13/AFF3/LRP6/MEOX2/PLXNA2/MED1/RARB/SFRP2/SHOX2/SOX11/TBX5/NR2F2/TGFB2/FZD6/NIPBL/CHST11/MAP3K20/LMBR1/CPLANE1/LNPK/RDH10/FREM2	28
BP	GO:0002062	chondrocyte differentiation	21/1752	123/18670	0.00506398	0.0483726	0.0399962	BMPR2/SERPINH1/COL6A2/COL12A1/LOXL2/RARB/SFRP2/SHOX2/SNAI2/SOX5/TGFBI/TGFBR1/COL14A1/CCN4/TRIP11/EIF2AK3/CHSY1/POC1A/CHST11/MEX3C/LNPK	21
BP	GO:0002262	myeloid cell homeostasis	24/1752	147/18670	0.00514645	0.0487846	0.0403369	ADAR/ANXA1/CASP3/CDK6/ETS1/FANCC/HIF1A/HOXA5/IREB2/SMAD5/KITLG/PDE4B/MED1/RB1/SP3/STAT1/STAT3/ADAM17/VEGFA/PTBP3/RBFOX2/SENP1/NCAPG2/KMT2E	24
BP	GO:0043524	negative regulation of neuron apoptotic process	24/1752	147/18670	0.00514645	0.0487846	0.0403369	APOE/BOK/EN1/F2R/HIF1A/KRAS/MAG/MSH2/PIK3CA/PRKCI/PTPRZ1/RASA1/ROCK1/SOD2/XRCC2/NRP1/CRLF1/KIF14/HYOU1/CHL1/ADNP/OXR1/CPEB4/DRAXIN	24
BP	GO:0061351	neural precursor cell proliferation	24/1752	147/18670	0.00514645	0.0487846	0.0403369	CDH2/FABP7/FLNA/HIF1A/INSM1/POU3F2/PROX1/PTN/PTPRZ1/RRM1/SOX5/NR2E1/TP53/VEGFA/FZD6/MELK/KIF14/RACGAP1/GJC2/CIP2A/SHCBP1/DOCK7/LRRK2/ASPM	24
BP	GO:0035304	regulation of protein dephosphorylation	23/1752	139/18670	0.00514883	0.0487846	0.0403369	RCAN1/MTOR/GSK3B/IGFBP3/ITGA1/PPP1R12A/PPP1R1A/PPP2R5E/EIF2AK2/PTBP1/PTN/ROCK1/ROCK2/LMTK2/SLC39A10/PPP1R14C/PPP1R1B/PPP1R15B/MASTL/PPP1R14A/CDCA2/BOD1L1/TIPRL	23
BP	GO:0046546	development of primary male sexual characteristics	23/1752	139/18670	0.00514883	0.0487846	0.0403369	ATRX/CCND1/BOK/CBL/FANCA/FLNA/HMGCS1/KITLG/MMP14/MSH2/KDM5A/RRM1/SDC1/SFRP2/SRD5A1/TGFB2/TGFBR1/TMF1/FNDC3A/NUPR1/KIF18A/BRIP1/ASPM	23
BP	GO:1904018	positive regulation of vasculature development	34/1752	230/18670	0.00525673	0.0497263	0.0411155	ANGPT2/ANXA1/BRCA1/CHI3L1/EFNB2/ETS1/HIF1A/ITGA5/ITGB1/ITGB8/KDR/SMAD1/SERPINE1/S100A1/SFRP2/SOD2/STAT3/THBS1/NR2E1/VEGFA/ADAM12/NRP1/SEMA5A/HDAC9/PLK2/SRPX2/ERAP1/AGGF1/RHOJ/PDGFD/MTDH/BMPER/MIR10B/MIR125B1	34
BP	GO:0044818	mitotic G2/M transition checkpoint	8/1752	30/18670	0.00527868	0.0498532	0.0412205	BRCA1/CDK1/CDC6/ORC1/TOPBP1/TAOK1/RINT1/CLSPN	8
CC	GO:0098687	chromosomal region	107/1810	349/19717	2.18689e-30	1.54176e-27	1.18322e-27	APC/BIRC5/ATR/ATRX/BRCA2/BUB1/BUB1B/CCNB1/CDK1/CDK2/CENPA/CENPE/CENPF/CHEK1/CSNK1A1/DNMT1/ERCC4/EZH2/FEN1/CENPI/HELLS/INCENP/MAD2L1/MCM2/MCM4/MCM6/MSH2/PPP1R12A/NEK2/NUP98/ORC1/ORC5/PCNA/PLK1/POLR2B/PRKDC/RAD51/CLIP1/AURKA/TP53BP1/TPR/TTK/WRN/XPO1/XRCC5/SMC1A/TNKS/BAZ1B/ZW10/AURKB/KNTC1/CKAP5/NCAPD2/DCLRE1A/RAD50/STAG1/NDC80/SPAG5/STAG2/KIF2C/ZWINT/OIP5/PDS5B/SMC5/FBXO28/PDS5A/NUP160/SMG6/NCAPD3/…	107
CC	GO:0000775	chromosome, centromeric region	75/1810	193/19717	4.85634e-29	1.71186e-26	1.31377e-26	APC/BIRC5/ATRX/BUB1/BUB1B/CCNB1/CENPA/CENPE/CENPF/CSNK1A1/DNMT1/CENPI/HELLS/INCENP/MAD2L1/PPP1R12A/NEK2/NUP98/PLK1/CLIP1/AURKA/TP53BP1/TPR/TTK/XPO1/SMC1A/BAZ1B/ZW10/AURKB/KNTC1/CKAP5/NCAPD2/STAG1/NDC80/SPAG5/STAG2/KIF2C/ZWINT/OIP5/PDS5B/FBXO28/PDS5A/NUP160/NCAPD3/CBX5/ERCC6L/ZWILCH/CDCA8/MIS18BP1/HJURP/CENPN/KNL1/SPC25/CENPK/NCAPG/CENPH/DSCC1/CENPO/CENPU/DSN1/KIF18A/NUF2/PHF6/KNSTRN/CENPL/CDCA5/S…	75
CC	GO:0000776	kinetochore	57/1810	135/19717	1.54548e-24	3.63188e-22	2.78729e-22	APC/BIRC5/BUB1/BUB1B/CCNB1/CENPA/CENPE/CENPF/CSNK1A1/CENPI/INCENP/MAD2L1/PPP1R12A/NEK2/NUP98/PLK1/CLIP1/TP53BP1/TPR/TTK/XPO1/SMC1A/ZW10/AURKB/KNTC1/CKAP5/NDC80/SPAG5/KIF2C/ZWINT/FBXO28/NUP160/CBX5/ERCC6L/ZWILCH/MIS18BP1/HJURP/CENPN/KNL1/SPC25/CENPK/CENPH/CENPO/CENPU/DSN1/KIF18A/NUF2/PHF6/KNSTRN/SPC24/SGO2/SGO1/SKA1/SKA3/BOD1L1/CHAMP1/CENPW	57
CC	GO:0000793	condensed chromosome	75/1810	223/19717	2.07966e-24	3.66539e-22	2.81301e-22	BIRC5/ATRX/BRCA1/BRCA2/BUB1/BUB1B/CCNB1/CDK2/CENPA/CENPE/CENPF/CHEK1/CSNK1A1/FANCD2/HSPA2/INCENP/MAD2L1/MKI67/NEK2/PLK1/RAD1/RAD51/AURKA/TOP2A/TP53BP1/SMC1A/BAZ1B/ZW10/AURKB/KNTC1/CKAP5/NCAPD2/SMC4/RAD50/LRPPRC/STAG1/NDC80/SMC2/SPAG5/STAG2/KIF2C/TOPBP1/ZWINT/SMC5/FBXO28/NCAPD3/NCAPH/ERCC6L/NCAPG2/ZWILCH/RIF1/MIS18BP1/HJURP/CENPN/KNL1/SPC25/CENPK/NCAPG/CENPH/CENPO/SMC6/CENPU/DSN1/NUF2/PHF6/KNSTRN/…	75
CC	GO:0005819	spindle	97/1810	347/19717	2.94068e-24	4.14636e-22	3.18213e-22	PARP4/BIRC5/BUB1B/CCNB1/CDK1/CDC6/CDC20/CENPE/CENPF/CLTC/DIAPH1/ECT2/HSPA2/INCENP/KIF2A/KIF11/KIFC1/MAD2L1/MID1/MYH10/NEDD9/NEK2/PKD2/PLK1/RB1/SNCG/AURKA/TPR/TTK/ALMS1/SMC1A/CDC7/CUL3/TNKS/PRC1/LATS1/ZW10/AURKB/KIF23/KIF20B/NCOR1/ESPL1/KNTC1/DLGAP5/CKAP5/CEP170/KIF14/KIF20A/STAG1/TACC3/SPAG5/STAG2/PLK2/NEK6/TOPBP1/TPX2/MTCL1/ARL2BP/KIF4A/POC1A/FBXO5/CKAP2/INVS/EML4/RACGAP1/GPSM2/NIN/NUSAP1/MAP10/…	97
CC	GO:0000779	condensed chromosome, centromeric region	51/1810	118/19717	1.17364e-22	1.37903e-20	1.05833e-20	BIRC5/ATRX/BUB1/BUB1B/CCNB1/CENPA/CENPE/CENPF/CSNK1A1/INCENP/MAD2L1/NEK2/PLK1/AURKA/TP53BP1/SMC1A/ZW10/AURKB/KNTC1/CKAP5/NCAPD2/NDC80/SPAG5/KIF2C/ZWINT/FBXO28/NCAPD3/ERCC6L/ZWILCH/MIS18BP1/HJURP/CENPN/KNL1/SPC25/CENPK/NCAPG/CENPH/CENPO/CENPU/DSN1/NUF2/PHF6/KNSTRN/SPC24/SGO2/SGO1/SKA1/SKA3/BOD1L1/CHAMP1/CENPW	51
CC	GO:0000777	condensed chromosome kinetochore	45/1810	105/19717	5.65229e-20	5.69266e-18	4.36883e-18	BIRC5/BUB1/BUB1B/CCNB1/CENPA/CENPE/CENPF/CSNK1A1/INCENP/MAD2L1/NEK2/PLK1/TP53BP1/SMC1A/ZW10/KNTC1/CKAP5/NDC80/SPAG5/KIF2C/ZWINT/FBXO28/ERCC6L/ZWILCH/MIS18BP1/HJURP/CENPN/KNL1/SPC25/CENPK/CENPH/CENPO/CENPU/DSN1/NUF2/PHF6/KNSTRN/SPC24/SGO2/SGO1/SKA1/SKA3/BOD1L1/CHAMP1/CENPW	45
CC	GO:0000922	spindle pole	50/1810	164/19717	8.96456e-15	7.90002e-13	6.06288e-13	CCNB1/CDC6/CDC20/CENPF/KIF2A/KIF11/MAD2L1/NEDD9/NEK2/PLK1/AURKA/ALMS1/SMC1A/CUL3/TNKS/PRC1/LATS1/ZW10/AURKB/KIF20B/KNTC1/DLGAP5/CKAP5/STAG1/TACC3/SPAG5/STAG2/PLK2/NEK6/TOPBP1/TPX2/MTCL1/POC1A/CKAP2/GPSM2/NIN/MAP10/TBCCD1/BIRC6/DSN1/FAM83D/KATNAL1/KNSTRN/NEDD1/UBXN2B/CKAP2L/SGO1/ASPM/BOD1L1/WDR62	50
CC	GO:0072686	mitotic spindle	39/1810	109/19717	2.34032e-14	1.83325e-12	1.40693e-12	CDK1/CENPE/CLTC/DIAPH1/ECT2/KIF11/KIFC1/MAD2L1/PKD2/AURKA/TPR/SMC1A/CDC7/TNKS/AURKB/KIF23/KIF20B/NCOR1/ESPL1/STAG1/TACC3/SPAG5/STAG2/TPX2/EML4/RACGAP1/GPSM2/NIN/NUSAP1/MAP10/MAP9/FAM83D/KIF18A/CEP295/KNSTRN/KIF18B/CKAP2L/SKA1/ASPM	39
CC	GO:0005876	spindle microtubule	24/1810	59/19717	1.00241e-10	7.067e-09	5.42357e-09	PARP4/BIRC5/CDK1/CENPE/CLTC/KIF2A/KIF11/PLK1/AURKA/CUL3/PRC1/ZW10/AURKB/KNTC1/KIF4A/NUSAP1/HAUS2/MAP9/KIF18A/CEP295/KIF18B/SKA1/SKA3/BOD1L1	24
CC	GO:0005874	microtubule	78/1810	416/19717	7.58672e-10	4.47506e-08	3.43439e-08	PARP4/APC/BIRC5/SHROOM2/BICD1/CCT6A/CDK1/CENPE/CLTC/INCENP/KIF2A/KIF11/KIFC1/MAP1B/MID1/MYO5A/NEK2/PLK1/CLIP1/SNTB2/AURKA/CUL3/IQGAP1/SYNJ1/PRC1/ZW10/AURKB/KIF23/KIF20B/KNTC1/CKAP5/CEP170/KIF14/KIF20A/LRPPRC/SPRY2/TUBA1B/TUBB4A/APPBP2/ARFGEF2/SPAG5/NEK6/HSPH1/KIF2C/MID2/WDR47/TPX2/CAMSAP2/KIF4A/CKAP2/INVS/EML4/RACGAP1/NIN/NUSAP1/GTSE1/MAP10/KIF26B/HAUS2/KIF21A/KIF15/SLAIN2/SHROOM3/MAP9/KIF18A/KAT…	78
CC	GO:0000780	condensed nuclear chromosome, centromeric region	15/1810	26/19717	7.61713e-10	4.47506e-08	3.43439e-08	ATRX/BUB1/BUB1B/CCNB1/CENPA/PLK1/AURKA/AURKB/NDC80/MIS18BP1/CENPK/CENPO/DSN1/NUF2/SGO1	15
CC	GO:0000794	condensed nuclear chromosome	30/1810	99/19717	2.31934e-09	1.2578e-07	9.65298e-08	ATRX/BRCA1/BRCA2/BUB1/BUB1B/CCNB1/CENPA/CHEK1/HSPA2/INCENP/NEK2/PLK1/RAD1/RAD51/AURKA/SMC1A/AURKB/NCAPD2/RAD50/LRPPRC/NDC80/TOPBP1/NCAPD3/NCAPH/MIS18BP1/CENPK/CENPO/DSN1/NUF2/SGO1	30
CC	GO:0000778	condensed nuclear chromosome kinetochore	11/1810	15/19717	3.65308e-09	1.83959e-07	1.41179e-07	BUB1/BUB1B/CCNB1/CENPA/PLK1/NDC80/MIS18BP1/CENPK/CENPO/DSN1/NUF2	11
CC	GO:0000307	cyclin-dependent protein kinase holoenzyme complex	18/1810	42/19717	8.1192e-09	3.81602e-07	2.92861e-07	CCND1/CCNA2/CCNB1/CCND2/CCNF/CCNT1/CDK1/CDK2/CDK4/CDK6/CKS1B/CKS2/PCNA/CDK14/RB1/CDK13/CCNB2/CDK12	18
CC	GO:0005657	replication fork	23/1810	70/19717	3.10698e-08	1.36901e-06	1.05065e-06	DNMT1/PCNA/POLA1/POLH/PRIM1/PURB/RFC3/TOP1/TP53/TP53BP1/WRN/XRCC2/CDC45/TIMELESS/BAZ1B/POLD3/WDHD1/UHRF1/GINS2/MCM10/RAD18/SMARCAD1/GINS4	23
CC	GO:0005925	focal adhesion	71/1810	405/19717	7.48894e-08	2.94529e-06	2.26036e-06	ACTN1/ANXA1/RND3/CAPN5/CAV1/CBL/CDH2/CLTC/CSPG4/DAG1/EFNB2/EGFR/EPHA2/FLNA/HSPG2/TNC/IGF2R/ITGA1/ITGA3/ITGA4/ITGA5/ITGAV/ITGB1/ITGB8/KRAS/MCAM/MMP14/MSN/PPP1R12A/NEDD9/PLAU/PTK7/TWF1/PTPN12/PVR/SNTB2/ADAM17/TPM4/VCL/YWHAG/FZD1/PIP5K1A/CASK/ADAM9/IQGAP1/NRP1/CPNE3/LIMD1/PDLIM1/KIF23/AKAP12/GIT2/ACTR3/ACTR2/HYOU1/NCKAP1/FERMT2/FAM107A/USP33/SYNE2/FLRT3/SENP1/LIMA1/FBLIM1/PARVA/EPB41L5/AFAP1/PEAK1/S…	71
CC	GO:0090734	site of DNA damage	23/1810	73/19717	7.51988e-08	2.94529e-06	2.26036e-06	POLH/RAD51/RBBP8/TP53/TP53BP1/XRCC5/TIMELESS/ACTR3/ACTR2/RAD50/SMC5/SMCHD1/CBX5/POLK/RFWD3/RIF1/RAD18/SMARCAD1/SMC6/WDR76/PARP9/ESCO2/RNF169	23
CC	GO:0005924	cell-substrate adherens junction	71/1810	408/19717	1.01034e-07	3.74888e-06	2.87708e-06	ACTN1/ANXA1/RND3/CAPN5/CAV1/CBL/CDH2/CLTC/CSPG4/DAG1/EFNB2/EGFR/EPHA2/FLNA/HSPG2/TNC/IGF2R/ITGA1/ITGA3/ITGA4/ITGA5/ITGAV/ITGB1/ITGB8/KRAS/MCAM/MMP14/MSN/PPP1R12A/NEDD9/PLAU/PTK7/TWF1/PTPN12/PVR/SNTB2/ADAM17/TPM4/VCL/YWHAG/FZD1/PIP5K1A/CASK/ADAM9/IQGAP1/NRP1/CPNE3/LIMD1/PDLIM1/KIF23/AKAP12/GIT2/ACTR3/ACTR2/HYOU1/NCKAP1/FERMT2/FAM107A/USP33/SYNE2/FLRT3/SENP1/LIMA1/FBLIM1/PARVA/EPB41L5/AFAP1/PEAK1/S…	71
CC	GO:0030055	cell-substrate junction	71/1810	412/19717	1.49534e-07	5.27108e-06	4.04529e-06	ACTN1/ANXA1/RND3/CAPN5/CAV1/CBL/CDH2/CLTC/CSPG4/DAG1/EFNB2/EGFR/EPHA2/FLNA/HSPG2/TNC/IGF2R/ITGA1/ITGA3/ITGA4/ITGA5/ITGAV/ITGB1/ITGB8/KRAS/MCAM/MMP14/MSN/PPP1R12A/NEDD9/PLAU/PTK7/TWF1/PTPN12/PVR/SNTB2/ADAM17/TPM4/VCL/YWHAG/FZD1/PIP5K1A/CASK/ADAM9/IQGAP1/NRP1/CPNE3/LIMD1/PDLIM1/KIF23/AKAP12/GIT2/ACTR3/ACTR2/HYOU1/NCKAP1/FERMT2/FAM107A/USP33/SYNE2/FLRT3/SENP1/LIMA1/FBLIM1/PARVA/EPB41L5/AFAP1/PEAK1/S…	71
CC	GO:0030496	midbody	38/1810	173/19717	3.02321e-07	1.01493e-05	7.78911e-06	BIRC5/CDK1/CENPE/CENPF/CTNND1/ECT2/INCENP/MYH10/NEK2/PLK1/PKN2/AURKA/IQGAP1/PRC1/USP8/AURKB/KIF23/KIF20B/URB2/KIF14/KIF20A/SPAG5/MTCL1/EXOC7/ARL2BP/KIF4A/CLIC4/RACGAP1/SH3GLB1/SSH1/MAP10/CDCA8/CEP55/BIRC6/SHCBP1/KLHL13/ASPM/CHAMP1	38
CC	GO:0000940	condensed chromosome outer kinetochore	9/1810	14/19717	5.93084e-07	1.90057e-05	1.45859e-05	BUB1/BUB1B/CCNB1/CENPF/PLK1/NDC80/SKA1/SKA3/BOD1L1	9
CC	GO:0051233	spindle midzone	14/1810	34/19717	6.82654e-07	2.09248e-05	1.60588e-05	CDC6/CENPE/PLK1/AURKA/AURKB/KIF20B/KIF14/RACGAP1/MAP10/CDCA8/RIF1/MAP9/KIF18A/KIF18B	14
CC	GO:0000781	chromosome, telomeric region	35/1810	161/19717	1.13005e-06	3.31951e-05	2.54756e-05	ATR/ATRX/BRCA2/CDK1/CDK2/CHEK1/ERCC4/EZH2/FEN1/MCM2/MCM4/MCM6/MSH2/ORC1/ORC5/PCNA/POLR2B/PRKDC/RAD51/TP53BP1/WRN/XRCC5/TNKS/DCLRE1A/RAD50/SMC5/SMG6/SMCHD1/CBX5/POT1/RIF1/DCLRE1B/CDC73/SMC6/DHX36	35
CC	GO:0005911	cell-cell junction	74/1810	459/19717	1.18228e-06	3.33403e-05	2.5587e-05	ACTN1/ANXA1/APC/SHROOM2/ATP1A1/ATP2A2/CCND1/BMPR2/KRIT1/CDH2/CDH4/CDH6/CDH11/CDK4/CTNND1/DAG1/ECT2/EPHA2/EIF4G2/FABP7/FLNA/GJB1/GJB2/ITGA5/ITGB1/KCNA2/AFDN/CLDN11/OXTR/PCDH1/PKD2/PODXL/PRKCI/PKN2/PTK7/TWF1/PVR/SCN2A/ADAM17/TGFBR1/VCL/VEGFA/CDC42BPA/CASK/LIN7A/IQGAP1/LIMD1/CLDN12/PDLIM1/MAGI1/DLG5/GJC1/ACTR3/LDB3/SIPA1L3/DDX58/CADM1/FLRT3/PANX1/CLIC4/NECTIN3/STEAP1/KIRREL1/ASH1L/GJC2/HEG1/SHROOM3/…	74
CC	GO:0031252	cell leading edge	67/1810	403/19717	1.25522e-06	3.40359e-05	2.61208e-05	ACTN1/APC/ATP2B1/ATP7A/CDH2/CDK6/CSPG4/CTNND1/DAG1/DIAPH1/EPHA2/EPS8/FER/ITGA5/ITGAV/ITGB1/KCNA2/MCC/KITLG/MKLN1/MYH10/MYO5A/NEDD9/PIK3CA/PKD2/PODXL/PRKCI/PKN2/TWF1/PTPN13/PTPRO/RASA1/ROBO2/ROCK1/CLIP1/ADAM17/PIP5K1A/CDC42BPA/IQGAP1/WASL/MTMR6/ACTR3/ACTR2/SPRY2/PDPN/NCKAP1/IQGAP2/FERMT2/FAM107A/SYNE2/PSD3/DDX58/SLC39A6/TNFRSF12A/LIMA1/SSH1/TRPM7/CCDC88A/PARVA/EPB41L5/ALS2/ARAP3/RAPH1/SPRY4/KIF18A…	67
CC	GO:0044420	extracellular matrix component	17/1810	51/19717	1.53829e-06	4.01663e-05	3.08257e-05	COL1A1/COL1A2/COL3A1/COL4A1/COL4A2/COL5A1/COL5A2/COL8A1/COL12A1/ELN/TNC/LAMB1/LAMC1/LTBP1/LUM/PTPRZ1/COL14A1	17
CC	GO:0097431	mitotic spindle pole	12/1810	27/19717	1.61741e-06	4.0724e-05	3.12536e-05	AURKA/SMC1A/TNKS/KIF20B/STAG1/SPAG5/STAG2/GPSM2/NIN/MAP10/FAM83D/ASPM	12
CC	GO:0034399	nuclear periphery	30/1810	131/19717	2.08488e-06	5.06841e-05	3.88975e-05	CENPF/DAG1/HLCS/LMNB1/NUP98/PCNA/POLA1/TP53/TPR/SMC1A/ENC1/CASK/NUP153/TENM1/DCAF7/STAG1/ARFGEF1/STAG2/XPOT/SCAF8/PAXIP1/NUP205/SATB2/KIF4A/CLIC4/UHRF1/PRPF40A/SMARCAD1/LMNB2/CENPW	30
CC	GO:0035861	site of double-strand break	18/1810	58/19717	2.47214e-06	5.80953e-05	4.45853e-05	POLH/RAD51/RBBP8/TP53/TP53BP1/TIMELESS/ACTR3/ACTR2/RAD50/SMC5/SMCHD1/RFWD3/RIF1/RAD18/SMARCAD1/SMC6/ESCO2/RNF169	18
CC	GO:0030027	lamellipodium	38/1810	193/19717	5.08579e-06	0.000115661	8.87638e-05	APC/CDH2/CSPG4/CTNND1/DAG1/EPHA2/FER/ITGAV/ITGB1/KCNA2/MCC/KITLG/MYH10/NEDD9/PIK3CA/PKD2/PODXL/PKN2/PTPN13/PTPRO/ROCK1/PIP5K1A/CDC42BPA/WASL/ACTR3/ACTR2/PDPN/NCKAP1/IQGAP2/FERMT2/SYNE2/SLC39A6/SSH1/CCDC88A/PARVA/ALS2/ARAP3/RAPH1	38
CC	GO:0005635	nuclear envelope	72/1810	464/19717	6.6254e-06	0.000145966	0.000112022	BOK/CCND2/CDK4/CENPF/CSE1L/EGFR/HOXA7/IGF2R/ITPR1/KCNH1/LBR/LMNB1/MAD2L1/SMAD1/NUP98/PDE4D/POLA1/PTGDS/RANBP2/RRM1/CLIP1/TMPO/TPR/XPO1/TNKS/MTMR6/GTF3C3/NUP155/NUP58/POM121/NUP153/LRPPRC/IPO7/WDR3/XPOT/ATF6/NUP205/UBXN4/ATP11B/SYNE2/NUP160/NEMP1/DPY19L1/CBX5/LEMD3/FAM169A/ANKRD17/MYOF/TOR1B/SENP1/ZNF354C/IPO11/DTL/RIF1/MNS1/LRRC59/IPO9/NDC1/TXLNG/PARP11/INTS2/XPO4/AEN/BRIP1/LMNB2/MTDH/OSBPL6/OSBP…	72
CC	GO:0043596	nuclear replication fork	14/1810	41/19717	9.3332e-06	0.000199391	0.000153023	PCNA/POLA1/PRIM1/PURB/TOP1/CDC45/TIMELESS/BAZ1B/POLD3/WDHD1/GINS2/MCM10/SMARCAD1/GINS4	14
CC	GO:0001726	ruffle	34/1810	172/19717	1.43234e-05	0.000296999	0.000227932	ACTN1/APC/CDK6/DIAPH1/EPHA2/EPS8/ITGA5/ITGAV/ITGB1/MKLN1/MYO5A/PODXL/TWF1/RASA1/ROCK1/CLIP1/ADAM17/PIP5K1A/IQGAP1/MTMR6/SPRY2/PDPN/NCKAP1/FAM107A/PSD3/DDX58/TNFRSF12A/LIMA1/TRPM7/EPB41L5/ALS2/ARAP3/SPRY4/KIF18A	34
CC	GO:0031965	nuclear membrane	50/1810	296/19717	1.74419e-05	0.000349916	0.000268543	BOK/CCND2/CDK4/EGFR/HOXA7/ITPR1/KCNH1/LBR/LMNB1/SMAD1/NUP98/PDE4D/PTGDS/RANBP2/TPR/XPO1/TNKS/GTF3C3/NUP155/NUP58/POM121/NUP153/LRPPRC/WDR3/NUP205/ATP11B/SYNE2/NEMP1/DPY19L1/LEMD3/FAM169A/ANKRD17/MYOF/TOR1B/SENP1/ZNF354C/DTL/RIF1/NDC1/TXLNG/INTS2/AEN/BRIP1/LMNB2/MTDH/OSBPL6/OSBPL8/CERS6/DPY19L2P2/POM121C	50
CC	GO:0098644	complex of collagen trimers	9/1810	19/19717	1.7868e-05	0.000349916	0.000268543	COL1A1/COL1A2/COL3A1/COL4A1/COL4A2/COL5A1/COL5A2/COL8A1/LUM	9
CC	GO:0005871	kinesin complex	16/1810	55/19717	2.21147e-05	0.000421374	0.000323384	CENPE/KIF2A/KIF11/KIFC1/KIF23/KIF20B/KIF14/KIF20A/KIF2C/KIF4A/KIF26B/KIF21A/KIF15/KIF18A/KIF18B/KIF24	16
CC	GO:0062023	collagen-containing extracellular matrix	63/1810	406/19717	2.44698e-05	0.00045398	0.000348407	ANXA1/APOE/AZGP1/BGN/SERPINH1/CDH2/COL1A1/COL1A2/COL3A1/COL4A1/COL4A2/COL5A1/COL5A2/COL6A2/COL8A1/COL12A1/CSPG4/DAG1/ELN/F13A1/FMOD/FN1/GDF10/HSPG2/TNC/LAMA2/LAMB1/LAMC1/LMAN1/LOXL2/LTBP1/LUM/MGP/MMP2/MMP9/NID1/SERPINE1/SERPINB8/PLSCR1/PTN/PTPRZ1/SFRP2/TGFB2/TGFBI/THBS1/TIMP1/TIMP3/COL14A1/VWF/PXDN/CASK/ADAM19/GDF15/GPC6/POSTN/NID2/MXRA5/SRPX2/EMILIN3/CTHRC1/NPNT/FREM2/SNORC	63
CC	GO:1990752	microtubule end	11/1810	29/19717	2.74734e-05	0.000496635	0.000381143	MYO5A/CLIP1/CKAP5/SPAG5/KIF2C/CAMSAP2/NIN/SLAIN2/KNSTRN/KIF18B/ASPM	11
CC	GO:0005721	pericentric heterochromatin	9/1810	20/19717	2.98399e-05	0.000525928	0.000403623	ATRX/CENPA/DNMT1/HELLS/INCENP/BAZ1B/NCAPD3/CBX5/ESCO2	9
CC	GO:1902554	serine/threonine protein kinase complex	21/1810	88/19717	3.54647e-05	0.000609819	0.000468006	CCND1/CCNA2/CCNB1/CCND2/CCNF/CCNT1/CDK1/CDK2/CDK4/CDK6/CKS1B/CKS2/PCNA/CDK14/RB1/TGFBR1/CDK13/CCNB2/ERC1/CDK12/SMCR8	21
CC	GO:0030120	vesicle coat	16/1810	58/19717	4.56078e-05	0.000765559	0.000587529	AP1G1/ARCN1/CLTC/COPA/COPB1/HIP1/COPB2/SEC24C/SEC24D/SEC24B/SEC23A/SEC24A/SYNRG/SEC31A/KLHL12/FCHO2	16
CC	GO:1990023	mitotic spindle midzone	7/1810	13/19717	5.66475e-05	0.000923261	0.000708557	CENPE/AURKB/KIF20B/MAP10/MAP9/KIF18A/KIF18B	7
CC	GO:0000784	nuclear chromosome, telomeric region	26/1810	125/19717	5.7622e-05	0.000923261	0.000708557	ATR/ATRX/BRCA2/CDK1/ERCC4/FEN1/MCM2/MCM4/MCM6/MSH2/ORC1/ORC5/PCNA/POLR2B/PRKDC/RAD51/TP53BP1/XRCC5/TNKS/DCLRE1A/RAD50/SMCHD1/CBX5/POT1/DCLRE1B/CDC73	26
CC	GO:0044450	microtubule organizing center part	34/1810	185/19717	6.82083e-05	0.0010686	0.000820095	BRCA1/CCNF/KIF2A/PDE4B/PLK1/ROCK1/RP2/STIL/AURKA/TOP2A/ALMS1/TNKS/CEP135/KIAA0586/CKAP5/CEP170/MPHOSPH9/SPAG5/PLK4/PLK2/CEP152/EXOC7/POC1A/NIN/CEP192/CEP55/RESF1/CCDC88A/CEP295/CEP41/SSX2IP/NEDD1/WDR62/KIF24	34
CC	GO:0031258	lamellipodium membrane	9/1810	22/19717	7.45755e-05	0.00114295	0.000877158	CSPG4/EPHA2/ITGAV/KCNA2/PDPN/NCKAP1/FERMT2/SYNE2/SLC39A6	9
[truncated: 195 more rows]

## Sheet: Table S7
Supplementary Table 7. The characteristics of CGGA1 and CGGA2 cohort.
characteristics		CGGA1 (mRNAseq_325)	CGGA2 (mRNA-array_301)
Age	<=60	161	148
	>60	10	8
Gender	Female	66	69
	Male	105	87
[truncated: 6 more rows]

## Sheet: Table S8
Supplementary Table 8. GSEA of significant GOBP and HALLMARK terms between high- and low-risk group.
[truncated: 1,617 more rows]

[truncated: 2 more sheets: Table S9, Table S10]
